# Supplementary material for: Tools to assess the measurement properties of quality of life instruments: a meta-review
Source: PubMed Central journal article supplement — BMJ Open. 2020 Aug 11;10(8):e036038. doi: 10.1136/bmjopen-2019-036038 (PMC7422655; doi:10.1136/bmjopen-2019-036038), 2020-08-11
Supplement: bmjopen-2019-036038.draft_revisions.pdf [file bmjopen-2019-036038.draft_revisions.pdf]

# BMJ Open

BMJ Open is committed to open peer review. As part of this commitment we make the peer review history of every article we publish publicly available.

When an article is published we post the peer reviewers' comments and the authors' responses online. We also post the versions of the paper that were used during peer review. These are the versions that the peer review comments apply to.

The versions of the paper that follow are the versions that were submitted during the peer review process. They are not the versions of record or the final published versions. They should not be cited or distributed as the published version of this manuscript.

BMJ Open is an open access journal and the full, final, typeset and author-corrected version of record of the manuscript is available on our site with no access controls, subscription charges or pay-per-view fees (<http://bmjopen.bmj.com>).

If you have any questions on BMJ Open's open peer review process please email [info.bmjopen@bmj.com](mailto:info.bmjopen@bmj.com)

# BMJ Open

## TOOLS TO ASSESS THE MEASUREMENT PROPERTIES OF QUALITY OF LIFE INSTRUMENTS: A META-REVIEW

|                               |                                                                                                                                                                                                                                                                                                                                                                                                                                                                                                                                                                                    |
|-------------------------------|------------------------------------------------------------------------------------------------------------------------------------------------------------------------------------------------------------------------------------------------------------------------------------------------------------------------------------------------------------------------------------------------------------------------------------------------------------------------------------------------------------------------------------------------------------------------------------|
| Journal:                      | <i>BMJ Open</i>                                                                                                                                                                                                                                                                                                                                                                                                                                                                                                                                                                    |
| Manuscript ID                 | bmjopen-2019-036038                                                                                                                                                                                                                                                                                                                                                                                                                                                                                                                                                                |
| Article Type:                 | Original research                                                                                                                                                                                                                                                                                                                                                                                                                                                                                                                                                                  |
| Date Submitted by the Author: | 27-Nov-2019                                                                                                                                                                                                                                                                                                                                                                                                                                                                                                                                                                        |
| Complete List of Authors:     | Lorente, Sonia; Universitat Autònoma de Barcelona, Department of Psychobiology and Methodology of Health Science Area of Behavioral Science Methodology; Consorci Sanitari de Terrassa, Pediatric Area Viladrich, Carme; Universitat Autònoma de Barcelona, Department of Psychobiology and Methodology of Health Science Area of Behavioral Science Methodology<br>Vives, Jaume; Universitat Autònoma de Barcelona, Losilla, Josep-Maria; Universitat Autònoma de Barcelona, Department of Psychobiology and Methodology of Health Science Area of Behavioral Science Methodology |
| Keywords:                     | Quality in health care < HEALTH SERVICES ADMINISTRATION & MANAGEMENT, QUALITATIVE RESEARCH, Protocols & guidelines < HEALTH SERVICES ADMINISTRATION & MANAGEMENT                                                                                                                                                                                                                                                                                                                                                                                                                   |
|                               |                                                                                                                                                                                                                                                                                                                                                                                                                                                                                                                                                                                    |

SCHOLARONE™  
Manuscripts

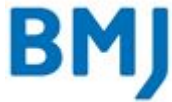

I, the Submitting Author has the right to grant and does grant on behalf of all authors of the Work (as defined in the below author licence), an exclusive licence and/or a non-exclusive licence for contributions from authors who are: i) UK Crown employees; ii) where BMJ has agreed a CC-BY licence shall apply, and/or iii) in accordance with the terms applicable for US Federal Government officers or employees acting as part of their official duties; on a worldwide, perpetual, irrevocable, royalty-free basis to BMJ Publishing Group Ltd ("BMJ") its licensees and where the relevant Journal is co-owned by BMJ to the co-owners of the Journal, to publish the Work in this journal and any other BMJ products and to exploit all rights, as set out in our [licence](#).

The Submitting Author accepts and understands that any supply made under these terms is made by BMJ to the Submitting Author unless you are acting as an employee on behalf of your employer or a postgraduate student of an affiliated institution which is paying any applicable article publishing charge ("APC") for Open Access articles. Where the Submitting Author wishes to make the Work available on an Open Access basis (and intends to pay the relevant APC), the terms of reuse of such Open Access shall be governed by a Creative Commons licence – details of these licences and which [Creative Commons](#) licence will apply to this Work are set out in our licence referred to above.

Other than as permitted in any relevant BMJ Author's Self Archiving Policies, I confirm this Work has not been accepted for publication elsewhere, is not being considered for publication elsewhere and does not duplicate material already published. I confirm all authors consent to publication of this Work and authorise the granting of this licence.

## TOOLS TO ASSESS HRQOL MEASUREMENT PROPERTIES

1

TOOLS TO ASSESS THE MEASUREMENT PROPERTIES OF QUALITY OF LIFE  
INSTRUMENTS: A META-REVIEW

Sonia LORENTE, Carme VILADRICH, Jaume VIVES, Josep-Maria LOSILLA

Universitat Autònoma de Barcelona

Sonia LORENTE, PhD Student, Adjunct Lecturer, Department of Psychobiology and Methodology of Health Science, Universitat Autònoma de Barcelona, UAB; Paediatric nurse, PNP, Hospital de Terrassa, Consorci Sanitari de Terrassa, Sonia.Lorente@uab.cat; Carme VILADRICH, PhD, Associate Professor, Department of Psychobiology and Methodology of Health Science, Universitat Autònoma de Barcelona, UAB, Carme.Viladrich@uab.cat; Jaume VIVES, PhD, Associate Professor, Department of Psychobiology and Methodology of Health Science, Universitat Autònoma de Barcelona, UAB, Jaume.Vives@uab.cat; Josep-Maria LOSILLA, PhD, Associate Professor, Department of Psychobiology and Methodology of Health Science, Universitat Autònoma de Barcelona, UAB, JosepMaria.Losilla@uab.cat

The authors declare no conflict of interest. This work is supported by the Grant PGC2018-100675-B-I00, Spanish Ministry of Science, Innovation and Universities (Spain). Correspondence concerning this article should be addressed to Jaume Vives, Department of Psychobiology and Methodology of Health Science, Universitat Autònoma de Barcelona, UAB. E-mail: [Jaume.Vives@uab.cat](mailto:Jaume.Vives@uab.cat)

## ABSTRACT

**Objective:** Using tools to assess the measurement properties of health status instruments improves the methodological quality of systematic reviews of measurement properties. This meta-review aimed to discuss the methodological, research and practical applications of the reported tools in systematic reviews that assess the measurement properties of instruments evaluating Health-Related Quality of Life (HRQoL). **Design:** Meta-review. **Methods:** Electronic search was carried out on bibliographic databases, including PubMed, CINAHL, PsycINFO, SCOPUS, WOS, COSMIN database, and ProQuest Dissertations & Theses, being limited by time (2008-2019) and language (English). The meta-review was conducted following the Preferred Reporting Items for Systematic Reviews and Meta-Analysis Guidelines (PRISMA). **Results:** A total of 226 systematic reviews were assessed. Concerning the quality of the review process, some methodological lacks were found, as the poor compliance with reporting or methodological guidelines. Regarding the procedures to assess the quality of measurement properties, 146 (64.6%) of reviewers applied one tool at least. Tool format and structure differed among standards or scientific traditions (i.e. psychology, medicine and economics), but most assess both measurement properties and the usability of instruments. As far as the results and conclusions of systematic reviews are concerned, only 60 (26.5%) linked the purpose of instrument to the evidence of measurement properties (e.g. evaluative to responsiveness). **Conclusions:** The quality of the review process increased over time, but reports should still improve with regard to adherence to guidelines. The COSMIN would be the most widespread and comprehensive tool both to assess the risk of bias of primary studies, and measurement properties of HRQoL instruments for evaluative purposes. Nonetheless, some improvements with respect to the length and structure, and the evaluation of the feasibility and burden may be advisable to increase its applicability and dissemination among researchers in order to conduct high quality systematic reviews. **PROSPERO**

## TOOLS TO ASSESS HRQOL MEASUREMENT PROPERTIES

3

**number:** CRD42017065232. **Key words:** Meta-review, Quality of life, Health instruments, Measurement properties, Measurement standards, HRQoL.

For peer review only

## TOOLS TO ASSESS HRQOL MEASUREMENT PROPERTIES

4

**STRENGTHS AND LIMITATIONS**

- The search strategy has been designed to be comprehensive, following the Peer Review of Electronic Search Strategies (PRESS) guidelines including specific filters for finding studies on psychometric properties of measurement instruments.
- A total of 226 systematic reviews were included and, to our knowledge, this meta-review provides the broadest overview of the most common tools used to assess measurement properties of HRQoL instruments and their relationship with measurement standards, scientific traditions and purposes of the measures.
- Some of the included systematic reviews poorly reported the review process, outcomes, and conclusions, and this fact may have led to miss some data.
- Inclusion of studies published in English only may have led to language bias.

## INTRODUCTION

Systematic reviews of measurement properties critically appraise the content and measurement properties of all instruments measuring a certain construct of interest in a specific study population<sup>1</sup>. Systematic reviews provide a comprehensive overview of the measurement properties of health instruments and support evidence in the selection of instruments for a given purpose (e.g. research, clinical practice, predictive)<sup>2,3</sup>. Because of their relevance, in this type of systematic review, different authors have evaluated the methodological quality not only of their key phases, namely the search strategy, the bias risk assessment of the primary studies and the data synthesis, but also if the measurement properties of the health status instruments have been appraised with standardized procedures or tools during the data extraction phase<sup>1,2,4,5</sup>. However, depending on the measurement standards upon these tools were developed, the approach to analyse the measurement properties of instruments may vary<sup>6</sup>, which could lead to different conclusions and recommendations in spite of the effort undertaken by the international Society for Quality of Life Research to set consensus based minimum standards<sup>7</sup>. Besides, according to Rosenkoetter and Tate<sup>6</sup>, the available assessment tools commonly used by clinicians and researchers to select the appropriate outcome measures for specific purposes show a variety of forms and cover a mix of standards related to reporting, methodological quality and statistical outcome quality.

The present meta-review aims to discuss the methodological, research and practical applications of the reported tools in systematic reviews that assess the measurement properties of instruments evaluating the quality of life within the context of health and disease, i.e., Health-Related Quality of Life (HRQoL)<sup>8</sup>. The specific objectives are to identify systematic reviews assessing the measurement properties of HRQoL instruments; identify the main tools applied to assess their measurement properties; describe the contents of the tools



## TOOLS TO ASSESS HRQOL MEASUREMENT PROPERTIES

6

1  
2  
3 applied (validity, reliability, feasibility, etc.); identify the measurement standards upon which  
4  
5 these tools were developed or conform to, comparing their similarities and differences, and  
6  
7 appraise how authors of these systematic reviews include the assessment of the measurement  
8  
9 quality in their results and conclusions, i.e. to what extent conclusions depend on the results  
10  
11 of the evaluation of the measurement properties, as well as their relationship, if any, with the  
12  
13 purpose of the HRQoL instrument (e.g. evaluative).  
14  
15

**METHODS**

16  
17  
18  
19 The protocol of this review<sup>9</sup> was prospectively registered. We conducted this meta-review  
20  
21 following the Preferred Reporting Items for Systematic Reviews and Meta-Analysis  
22  
23 Guidelines (PRISMA)<sup>10,11</sup>.  
24  
25

**Search strategy**

26  
27  
28 A systematic search was performed in PubMed, US National Library of Medicine, by  
29  
30 National Center for Biotechnology Information (NCBI); CINAHL, Cumulative Index to  
31  
32 Nursing and Allied Health Literature, by EBSCOhost; PsycINFO, Psychological Information,  
33  
34 by APA PsycNET; SCOPUS by Elsevier; WoS ,Web of Science CORE, by Thomson  
35  
36 Reuters, and Consensus-based Standards for the selection of Health Measurement  
37  
38 Instruments database by COSMIN Initiative (<http://www.cosmin.nl/>). ProQuest Dissertations  
39  
40 & Theses Global was used for searching grey literature, and search alerts in all databases  
41  
42 were set. The search strategy followed the Peer Review of Electronic Search Strategies  
43  
44 (PRESS) guidelines recommendations<sup>12,13</sup>, and consisted of 3 filters composed of search  
45  
46 terms for the following: (1) systematic review methodology; (2) HRQoL instruments; and (3)  
47  
48 measurement properties. The latter filter was developed by the Vrije University Medical  
49  
50 Center for finding studies on measurement properties of measurement instruments<sup>14</sup>. All  
51  
52 filters were adapted for all databases. Search was performed in July 2018, limited by time,  
53  
54 and language (English) (See Supplementary File S1 for search strings for all databases).  
55  
56  
57  
58  
59  
60

## TOOLS TO ASSESS HRQOL MEASUREMENT PROPERTIES

7

**Inclusion criteria***Time frame*

We limited our search to studies published between 2008-2019, including search alerts.

*Study design*

Systematic reviews aiming to report or to assess the measurement properties of instruments evaluating the quality of life within the context of health and disease<sup>8</sup>. Systematic reviews were required to include the full results report and detailed information about the procedures used to assess the measurement properties. Systematic reviews exclusively focused on the evaluation of clinical interventions were excluded.

*Setting and Participants*

We included the whole range of ages (new-borns, toddlers, children, teenagers, young adults, middle-age adults and elderly people), in any healthcare setting.

**Study screening**

References identified by the search strategy were entered into Mendeley reference management software, and duplicates were removed. Titles and abstracts were screened independently by two reviewers. When decisions were unable to be made from title and abstract alone, the full paper was retrieved. Full-text inclusion criteria were checked independently by two reviewers. Discrepancies during the process were resolved through discussion (with a third reviewer when necessary).

**Data extraction**

Extracted information of each selected systematic review and meta-analysis included general information as author, year, and quality of review process of systematic reviews (e.g. protocol registration, reporting guidelines, use of flowchart). Information concerning the main identified tools applied to assess the measurement properties of HRQoL instruments included the title, purpose/use, number of items, response categories, instrument assessment

1  
2  
3 criteria, and measurement properties assessed. Information of how authors of these  
4  
5 systematic reviews include the assessment of the quality of HRQoL in their results and  
6  
7 conclusions. Authors of eligible studies were contacted to provide missing or additional data  
8  
9 when necessary.  
10

## 11 **RESULTS**

### 12 **Search results**

13  
14  
15  
16  
17 Figure 1 shows the results of the search strategy, reported according to the PRISMA flow  
18  
19 diagram. A total of 4280 references were identified through databases search. After removing  
20  
21 duplicates, 3015 titles and abstracts were screened. After the assessment of 485 full-text  
22  
23 documents for eligibility, plus 20 additional articles identified by citation alerts, a total of 226  
24  
25 systematic reviews were included in the qualitative analysis. These systematic reviews  
26  
27 covered a wide range of HRQoL instruments, both generic and disease-specific. A total of 23  
28  
29 (10.2%) of systematic reviews assessed the quality of one measurement property only, such  
30  
31 as the conceptual and measurement model or the content validity (See Supplementary File 2  
32  
33 for characteristics and references of studies).  
34  
35  
36

37 -----Insert Figure 1 here or near here-----  
38

### 39 **Quality of review process of systematic reviews**

40  
41  
42 Table 1 shows the quality of review process of systematic reviews. Findings showed that 18  
43  
44 (8.0%) of reports registered the protocol prospectively, a figure that raised to 16% when  
45  
46 considering the reports from 2014 onwards; 64 (28.3%) followed reporting guidelines such as  
47  
48 PRISMA (45.3% the last six years), 33 (14.6%; 18.9% the last six years) assessed the  
49  
50 reporting and/or the methodological quality of primary studies using recommended guides,  
51  
52 such as Standards for the Reporting of Diagnostic Accuracy Studies (STARD) and Quality  
53  
54 Assessment of Diagnostic Accuracy Studies (QUADAS), respectively, 218 (96.5%) reported  
55  
56 the search strategy, 99 (43.8%) reported the detailed syntax for one database at least, 117  
57  
58  
59  
60

## TOOLS TO ASSESS HRQOL MEASUREMENT PROPERTIES

9

(51.8%) made the article selection by two or more independent reviewers, 148 (65.5%) used a flowchart to report search outcomes, and 127 (56.2%) stated the funding. These last percentages slightly increased when reducing the time frame to the last six years.

-----Insert Table 1 here or near here-----

**Assessment of measurement properties of HRQoL instruments**

Assessment procedures of measurement properties varied considerably. A total of 146 (64.6%) out of 226 systematic reviews applied one tool at least, that is, a published and well accepted list of criteria, to rate the evidence on measurement properties of instruments; 38 (16.8%) applied their own author's criteria only; 30 (13.3%) followed literature recommendations included in very highly circulated books or papers only, and 12 (5.3%) used an *ad hoc* checklist of criteria only. A total of 80 (35.9%) systematic reviews did combine different procedures. Most usual combinations were the use of two tools or one tool and literature recommendations.

*Tools to assess measurement properties of HRQoL instruments*

The first twelve columns of Table 2 present the characteristics for the identified tools used to assess measurement properties using the last update we are aware of. Tools are reported in order of frequency of use, as pointed out in the last row of the table: 1) "Consensus-based Standards for the selection of Health Measurement INstruments (COSMIN)", COSMIN initiative<sup>15,16</sup>; 2) "Quality Criteria for Measurement Properties", Terwee et al.<sup>17</sup>; 3) "Attributes and Criteria to assess Health Status and Quality of Life Instruments", Scientific Advisory Committee Medical Outcomes Trust (SACMOT)<sup>18,19</sup>; 4) "Health Status Measures in Economic Evaluation", Brazier et al.<sup>20,21</sup>; 5) "Guidance for Industry Patient-reported Outcomes Measures", Food and Drug Administration (FDA)<sup>22,23</sup>; 6) "Evaluating Patient-based Outcomes Measures for use in clinical trials", Fitzpatrick et al.<sup>24</sup> (also known as Fitzpatrick's criteria); 7) "International Classification of Functioning" and "International

## TOOLS TO ASSESS HRQOL MEASUREMENT PROPERTIES

10

1  
2  
3 Classification of Functioning for Children and Youth”, World Health Organization<sup>25</sup>; 8)  
4  
5 “Evaluating Measures of Patient Reported Outcomes (EMPRO)”, Spanish Cooperative  
6  
7 Investigation Network for Health and Health Service Outcomes Research (IRYSS)<sup>26</sup>; 9)  
8  
9 “Spinal Cord Injury Criteria”, Spinal Cord Injury Rehabilitation Evidence (SCIRE)<sup>27,28</sup>; 10)  
10  
11 “Criteria for Assessing the Tools of Disability Outcomes Research”, Andresen<sup>29</sup> (also known  
12  
13 as Andresen’s tool); 11) “CanChild Outcomes Measures”, CanChild Center for Childhood  
14  
15 Disability Research<sup>30</sup>, and 12) “Outcomes Measures in Rheumatology Clinical Trials  
16  
17 (OMERACT)”, OMERACT initiative<sup>31</sup>. Table 2 also includes a last column showing the  
18  
19 characteristics of Testing Standards by American Educational Research Association (AERA),  
20  
21 American Psychological Association (APA) and National Council on Measurement in  
22  
23 Education (NCME)<sup>32,33</sup> initially published in 1954 and regularly updated every decade using  
24  
25 consensus based procedures. Because most of the technical vocabulary for measurement  
26  
27 properties in HRQoL instruments is inspired in the Testing Standards, they will be used as a  
28  
29 reference to compare the twelve identified tools. In fact, these standards have already been  
30  
31 recommended to establish a unified approach to validity and reliability of results derived from  
32  
33 psychometric instruments in clinical medicine, research and education<sup>34</sup>.  
34  
35  
36  
37  
38  
39  
40 Different methodologies were used to develop the tools. The expert panel consensus and the  
41  
42 literature review were the most usual methods, led by Steering Committees or Staff/Working  
43  
44 Groups. The format and structure of these tools also vary. Whereas seven of them were  
45  
46 structured in items that allow obtaining quality scores, the other six took the form of  
47  
48 standards or guidelines. Tools with an item structure were the COSMIN, Quality Criteria for  
49  
50 Measurement Properties, EMPRO, SCI Criteria, Criteria for Assessing the Tools of Disability  
51  
52 Outcomes Research (Andresen’s tool), CanChild Outcomes Measures, and OMERACT.  
53  
54  
55  
56 Among all measurement properties considered in Testing Standards, eleven out of the twelve  
57  
58 tools recommended to assess the conceptual and measurement model; content, structural,  
59  
60

## TOOLS TO ASSESS HRQOL MEASUREMENT PROPERTIES

11

1  
2  
3 convergent, discriminant, concurrent and predictive validity; responsiveness or sensitivity to  
4  
5 change; internal consistency, test retest and inter-rater reliability. However, the approach to  
6  
7 analyse these measurement properties vary, with examples found in construct validity,  
8  
9 criterion validity and reliability. Depending on the tool, construct validity can be evaluated  
10  
11 either by hypothesis confirmation in general (e.g. COSMIN or EMPRO), or by specific  
12  
13 hypothesis based on correlations with other measures, i.e. convergent and discriminant  
14  
15 validity (e.g. Andresen's tool). Criterion validity can be assessed either by the comparison  
16  
17 with a gold standard, specificity and sensitivity, or predictive values (e.g. FDA), or only by  
18  
19 the comparison with a gold standard (e.g. CanChild Outcomes Measures). Reliability can be  
20  
21 analysed either by test retest reliability, inter-rater reliability and internal consistency (e.g.  
22  
23 FDA), or only by test retest and inter-rater agreement (e.g. Economic evaluation). Despite the  
24  
25 Testing Standards recommendations, just one tool include additional criteria to assess  
26  
27 consequential validity (SCI), and four assess the fairness (e.g. accessible forms for subjects  
28  
29 with vision impairment, or for specific populations) (SACMOT, FDA, SCI and Andresen's  
30  
31 tool). None of them include criteria to assess the validity of response processes. Other  
32  
33 HRQoL instrument characteristics, such as feasibility (e.g. cost of obtaining a sample),  
34  
35 acceptability (e.g. suitability from the patient perspective), or burden (e.g. the time or effort  
36  
37 placed on the administration of the instrument) are assessed instead. Finally, notice that some  
38  
39 concepts changed their place over time. The clearest case is evidence regarding cross-cultural  
40  
41 equivalence which was treated as an additional characteristic of the instruments in tools  
42  
43 released before 2014 (e.g., EMPRO or SCI) but was considered a proper measurement  
44  
45 property in the 2018's update of COSMIN. It is also considered a measurement property in  
46  
47 Testing Standards where is included as a particular case of differential item functioning when  
48  
49 assessing the internal structure of the instruments (See Supplementary File S3 for more  
50  
51 details).  
52  
53  
54  
55  
56  
57  
58  
59  
60

-----Insert Table 2 here or near here-----

### **Purpose of instruments and their association to measurement properties**

Some of the differences between tools can be attributed to the fact that they are devoted to the evaluation of instruments developed with different purposes. For instance, COSMIN aims at assessing the quality of instruments for an evaluative purpose whereas the Economic Evaluation tool aims at the assessment of instruments for analytical purposes. Nevertheless, the relation between the purpose of the instruments and the measurement properties assessed is not regularly included in the conclusions of the systematic reviews. Table 3 shows the purposes of instruments, based on the framework proposed by McDowell et al.<sup>35</sup>, and the association to measurement properties that reviewers established in their conclusions. The purposes for which instruments had been more frequently used were Evaluative 168 (74.3%), and Impact of Disease on HRQoL assessment, 127 (56.2%), either alone or in conjunction. Other purposes were Analytic 33 (14.6%), Diagnostic 16 (7.1%), Descriptive 4 (1.8%), and Predictive 1 (0.4%). A total of 6 (2.7%) systematic reviews did not report or did not clearly state the purpose of the instruments. As far as the assessment and conclusions is concerned, only 60 (26.5%) systematic reviews linked the purpose of the instrument to measurement properties. The most usual purpose, Evaluative, was associated to responsiveness, content validity or reliability, to name a few. The assessment of the Impact of Disease on HRQoL was associated to conceptual and measurement model and content validity, the Analytic purpose to preference-based valuation (e.g. utility scores) and agreement, and the Diagnostic purpose to known groups validity and test retest reliability. To better understand these results, some examples are given. When evaluative purpose was associated to responsiveness, we found conclusions such as: “For use in longitudinal studies or clinical practice, where responsiveness is an issue, the Minnesota Living with Heart Failure Questionnaire (MLHFQ) and the Chronic Heart Failure Questionnaire (CFHQ) would be adequate”<sup>36</sup>. When Impact of



## TOOLS TO ASSESS HRQOL MEASUREMENT PROPERTIES

13

1  
2  
3 Disease on HRQoL purpose was associated to measurement model, conclusions resembled  
4 this one, for instance: “None of the RLS specific QOL measures appears to have been  
5 informed by a conceptual model or a conceptual framework. Consequently, none can be  
6 considered comprehensive in terms of assessing the full impact of Rest Legs Syndrome on  
7 QOL”<sup>37</sup>. Third, an example illustrating general conclusions, i.e. conclusions that did not  
8 associate the purpose of the instrument to any specific measurement properties, were as  
9 follows: “None of the available instruments fulfils the psychometric demands of reliability,  
10 validity and responsiveness to serve as a primary outcome measure in clinical trials”<sup>38</sup>

**Discussion**

21  
22  
23 The present meta-review identified 226 systematic reviews assessing measurement properties  
24 of HRQoL instruments in order to analyse the quality of the review process, describe the  
25 most used tools to assess measurement properties and examine how reviewers included the  
26 assessment of the quality of HRQoL in their conclusions. It has been shown how the quality  
27 of the review process has increased over time as well as how reviewers reported the search  
28 strategy, stated inclusion and exclusion criteria taking the judgement of two or more  
29 independent reviewers into account and used a flow chart to report search outcomes.  
30 However, some crucial methodological lacks were also found. Practices such as the  
31 registration of the protocol, reporting the detailed search syntax for one database at least,  
32 adherence to reporting guidelines, and assessing the reporting and the methodological quality  
33 of primary studies were quite sparse even in recent years. As Pussegoda et al.<sup>4</sup> suggested, this  
34 fact may be related to the perceived time-consuming task of using guidelines or to the lack of  
35 information about the most appropriate tool. According to our data, there is still large room for  
36 improvement in the assessment of the methodological quality of included studies in order to  
37 attend to Terwee et al.’s warning<sup>2</sup> of avoiding the risk of presenting biased results, leading to  
38 underestimate or overestimate the quality of an instrument.  
39  
40  
41  
42  
43  
44  
45  
46  
47  
48  
49  
50  
51  
52  
53  
54  
55  
56  
57  
58  
59  
60



## TOOLS TO ASSESS HRQOL MEASUREMENT PROPERTIES

14

1  
2  
3 Assessment procedures of measurement properties of HRQoL instruments were diverse.

4  
5 Most of the reviewers used a tool or more than one. Nevertheless, there were reviewers that  
6  
7 applied their own criteria, followed literature recommendations or applied different *ad hoc*  
8  
9 devised checklists. It is noticeable the use of such diverse procedures, even in recent years,  
10  
11 when well accepted tools to assess measurement properties are available.  
12  
13

14  
15 Our meta-review identified up to twelve tools. Seven of them had an item structure, offering  
16  
17 a comparable approach to rate the evidence on measurement properties. Length and scoring  
18  
19 differed, but also the instrument assessment criteria. Actually, depending on the tool used, the  
20  
21 approach to assess properties varied greatly, with potentially serious consequences. The fact  
22  
23 that a single measurement property is or isn't required can change the status of quality of the  
24  
25 evidence supporting the same measurement instrument. The variety of forms found were in  
26  
27 concordance to results from related research, which also highlighted the complexity with  
28  
29 regard to definitions of measurement properties<sup>6</sup>. This complexity is also reflected in the  
30  
31 search filter developed by the COSMIN initiative<sup>14</sup>. They recommend using 3 filters that sum  
32  
33 up more than 100 search terms in order to get sensible and specific results. In addition, and  
34  
35 also depending on the tool used, other characteristics, such as feasibility, acceptability, and  
36  
37 burden were assessed. In spite of the dispersion, a shared conclusion can be stated as follows:  
38  
39 because these instruments are to be used in the daily practice, their usability should be always  
40  
41 balanced with other characteristics considered as proper measurement properties<sup>39,40</sup>. For  
42  
43 instance, an instrument needs to be long enough to ensure reliability and construct validity,  
44  
45 but short enough to ensure the adequate response rate and sample size. Otherwise the  
46  
47 instrument purpose and sustainability will be on hazards<sup>39</sup>.  
48  
49  
50  
51  
52

53  
54 The differences between tools and their potentially serious consequences on the assessment  
55  
56 of the quality of the primary studies may be better addressed in the light of three  
57  
58 considerations: the date of publication, the main scientific tradition involved when  
59  
60

## TOOLS TO ASSESS HRQOL MEASUREMENT PROPERTIES

15

1  
2  
3 developing the tools, and the purpose of the instruments under assessment. Some differences  
4  
5 can be simply explained by the date of publication of the tools. As an example, where more  
6  
7 ancient tools require specific forms of validity evidence related to external variables such as  
8  
9 convergent and discriminant validity, recent tools incorporate the more general view of  
10  
11 hypothesis testing. That is, when developing a new use for an instrument, hypotheses should  
12  
13 be made regarding the expected relations with other relevant variables in their nomological  
14  
15 network and these hypotheses and no other should be tested<sup>32</sup>. Regarding the scientific  
16  
17 traditions, the assessment of outcomes is a constitutive part of the disciplines of Education  
18  
19 and Psychology where the Testing Standards come from. In these contexts, participation is  
20  
21 taken for granted as assessment practices result in high stakes decisions such as, for instance,  
22  
23 certification or personnel selection. The main concern regarding integrity of the instrument  
24  
25 purpose is its fakeability, which could distort the decision-making process, and this would  
26  
27 explain the interest in response processes in this field<sup>41,42</sup>. By contrast, the main objective in  
28  
29 the discipline of Medicine is to provide health care services. Evaluation of subjective views  
30  
31 of patients was a late addition related to the inclusion of HRQoL in the accounting of health  
32  
33 care outcomes. As aforementioned, the integrity of the instrument purpose requires that it  
34  
35 does not interfere with the main objective of both patients and professionals<sup>39</sup>. Specifically, in  
36  
37 the context of disability research, the administrative and respondent burden requires  
38  
39 additional consideration. The administrative burden may include the need for a Sign  
40  
41 Language interpreter, and the respondent burden includes the length of the questionnaire,  
42  
43 which is especially relevant when using HRQoL instruments with cognitively impaired  
44  
45 subjects<sup>29</sup>. Balancing the traditional psychometric criteria, the practicalities of the instruments  
46  
47 and patient preferences is a generic recommendation for health research, but becomes on  
48  
49 special obligation for research with people with specific needs<sup>29</sup>. Moreover, devising test  
50  
51 accommodations or accessible forms when needed is expected to become a required  
52  
53  
54  
55  
56  
57  
58  
59  
60

## TOOLS TO ASSESS HRQOL MEASUREMENT PROPERTIES

16

1  
2  
3 psychometric criterion in near future, provided that it has already been included under the  
4 title “fairness in testing” as a new section next to validity and reliability in the chapter of  
5 measurement foundations in the more recent update of Testing Standards<sup>32</sup>.  
6  
7

8  
9  
10 The third in the party would be Economic evaluation, traditionally embedded in providing  
11 quantitative judgments able to be integrated in mathematical models such as those used in  
12 calculating quality-adjusted life years (QALYs) and using preference-based methods to  
13 obtain their data. Due to that, some very popular measurement properties such as internal  
14 structure based on factor analysis are not relevant and thus not considered in their tools. In  
15 this tradition the main concerns regarding the integrity of the instrument purpose is whose  
16 values should be considered when determining preferences and how well the preferences of  
17 patients and decision makers are likely to conform to the main assumptions of the utility  
18 models<sup>20,21</sup>.  
19  
20  
21  
22  
23  
24  
25  
26  
27  
28  
29

30 In our view, considering in the first place the third consideration, the purpose of the  
31 instrument, would help to reconcile the different requirements. Tools should be adapted or  
32 extended in order to test the measurement quality of instruments intended to be used with  
33 different purposes, such as evaluative, impact of disease on HRQoL assessment, analytic,  
34 diagnostic, descriptive or predictive. Notice that depending on the purpose, some domains of  
35 validity and reliability may be of greater or lesser relevance<sup>6,16</sup>. For instance, an instrument  
36 developed to assess longitudinal changes should demonstrate high responsiveness<sup>6</sup>, but when  
37 the purpose is diagnostic, the instrument should be able to distinguish among individuals or  
38 groups<sup>6</sup>, i.e. known groups validity, or the internal consistency reliability based on inter-item  
39 relationships is not relevant for a preference-based instrument but is relevant for an  
40 instrument based on a unidimensional measurement model. However, our data showed that  
41 only few authors established a clear link in recommendations between the purpose of the  
42 measure and the evidence of measurement properties reported. The vast field of HRQoL  
43  
44  
45  
46  
47  
48  
49  
50  
51  
52  
53  
54  
55  
56  
57  
58  
59  
60

## TOOLS TO ASSESS HRQOL MEASUREMENT PROPERTIES

17

1  
2  
3 offered a plethora of instruments but, as most reviewers did not take the purpose into account,  
4  
5 the overall rating of measurement properties was not consistent and thus the instrument may  
6  
7 or may not be adequate. Because the evaluation and improvement of quality of life is  
8  
9 considered a public health priority<sup>8</sup>, we strongly encourage researchers to assess the quality  
10  
11 of measurement properties of HRQoL instruments according to the purpose of the measure.  
12  
13 Otherwise there is a serious risk of biased results which could lead to underrate the quality  
14  
15 and suitability of the instrument.  
16  
17

*Conclusions*

18  
19  
20  
21 The quality of the systematic review process has been increasing over time, but it should still  
22  
23 improve regarding to the prospective registration of protocol and with respect to the adoption  
24  
25 of guidelines to increase its methodological quality and that of its report. In the specific  
26  
27 context of systematic reviews of measurement instruments, enhancing the quality of the  
28  
29 process also involves the assessment of measurement properties by using a standardized tool.  
30  
31 Selection of the most suitable tool may be addressed according to the coverage of the  
32  
33 appraised measurement properties, but also in the light of other important criteria, that are the  
34  
35 purpose of the HRQoL instruments evaluated, the format of the tool, and if it assesses both  
36  
37 usability (e.g. feasibility or burden) and accommodation (or accessible forms). First, the  
38  
39 assessment methodology should be adapted when necessary, establishing the relation  
40  
41 between the purpose of the HRQoL instruments and the measurement properties assessed.  
42  
43 Second, to standardize the review process, the tool's format should be item-structured,  
44  
45 offering a comparable approach to rate the evidence on measurement properties. So, those  
46  
47 tools that take the form of guidelines, as the SACMOT or the Economic Evaluation, would be  
48  
49 considerably upgraded if the structure is reconverted, since the current format just allow to  
50  
51 describe rather than to critically appraise the quality of an instrument, as well as difficult the  
52  
53 comparability of results. Third, because systematic reviews on measurement properties aim to  
54  
55  
56  
57  
58  
59  
60

## TOOLS TO ASSESS HRQOL MEASUREMENT PROPERTIES

18

1  
2  
3 help professionals to select the best instrument for a clinical scenario, the feasibility, patient's  
4 preferences, administrator and respondent burden, and the accommodations (or accessible  
5 forms) should be addressed and evaluated. Otherwise the suitability and purpose of  
6 instruments might be compromised, especially in the context of disability research. Tools  
7 identified in our meta-review that meet most of these criteria may be the COSMIN, EMPRO,  
8 SCI criteria, Andresen's tool, Can Child Outcomes, and OMERACT, since all of them cover  
9 a wide range of measurement properties, offer an item structure, and assess the usability of  
10 instruments.

11  
12 Special mention is due to the COSMIN, the most widespread and comprehensive tool to  
13 assess measurement properties of health instruments designed for an evaluative purpose. As  
14 mentioned above, the COSMIN should be adapted if it was generalized to the assessment of  
15 health measurement instruments for purposes other than evaluative. In our opinion some  
16 improvements concerning the length and structure of the COSMIN are also advisable, as the  
17 current format is fairly complex and time-consuming, so requiring high expertise in the field  
18 of psychometrics, and lots of resources. In this regard, the recent updated version of the  
19 OMERACT, which provides a checklist with four steps to appraise the quality of the  
20 measurement properties, might be an example of streamlining the review process and the  
21 instrument selection<sup>31</sup>. Assessing the accommodation or accessible forms for specific  
22 population as a psychometric criterion, as the Testing Standards recommend under the title  
23 "fairness in testing", would be also recommendable. Finally, the feasibility, which the  
24 COSMIN merely describes, should be rated, and the burden assessment should be included,  
25 with examples found in EMPRO or Andresen's tool.

26  
27 The process of systematic review of measurement instruments should also include the  
28 appraisal of risk of bias (RoB) of the selected primary studies. It is noteworthy that the last  
29 update of the COSMIN has incorporated a guideline to appraise the RoB of primary studies  
30  
31  
32  
33  
34  
35  
36  
37  
38  
39  
40  
41  
42  
43  
44  
45  
46  
47  
48  
49  
50  
51  
52  
53  
54  
55  
56  
57  
58  
59  
60

## TOOLS TO ASSESS HRQOL MEASUREMENT PROPERTIES

19

1  
2  
3 according to the Cochrane methodology for systematic reviews of trial and diagnostic studies.  
4  
5 It must be considered, however, that the RoB evaluation of studies is itself a productive field  
6  
7 of research with a long tradition, with specific tools that have been developed for different  
8  
9 research questions and study designs. Examples might be found in the Cochrane  
10  
11 Collaboration's Tool for Assessing the Risk of Bias of Clinical Trials<sup>43</sup>, the Newcastle  
12  
13 Ottawa Scale (NOS)<sup>44</sup> for nonrandomised studies, or the Quality Assessment Tool for Cohort  
14  
15 Studies (Q-COH II)<sup>45,46</sup>. From our point of view, the COSMIN proposal could also be  
16  
17 simplified and improved by guiding the reviewers towards the identification of the most  
18  
19 appropriate RoB assessment tools instead of developing their own RoB appraisal guidelines,  
20  
21 taking advantage of knowledge and innovations in that field of research. And last, but not  
22  
23 least, improving the quality of systematic reviews encompasses researchers, sponsors and  
24  
25 promoters, but also journals, that should require the full compliance with reporting and  
26  
27 methodological guidelines, and the use of assessment tools.  
28  
29  
30  
31

**Patient and Public Involvement**

32  
33  
34 No patient or public involvement  
35  
36

**Ethics and dissemination**

37  
38  
39 Ethical approval is not necessary for meta-reviews  
40  
41

**Data availability statement**

42  
43  
44 Data are available upon reasonable request to the authors.  
45  
46

**Authors' contribution**

47  
48  
49 All authors meet the criteria recommended by the International Committee of Medical  
50  
51 Journal Editors, ICMJE. All authors made substantial contributions to conception and design,  
52  
53 piloted the inclusion criteria and provided direction of the data extraction and analysis. SL  
54  
55 draft the article, and JV, CV and JML critically revised the draft for important intellectual  
56  
57 content. All authors agreed on the final version.  
58  
59  
60

**Funding statement**

This work was supported by the Grant PGC2018-100675-B-I00, Spanish Ministry of Science, Innovation and Universities (Spain).

**Competing interests' statement.**

The authors declare no conflict of interest. The authors have no financial relationships relevant to this article to disclose, and the funders had no role in the study design, data collection and analysis, decision to publish, or preparation of the manuscript.

**Correspondence**

Correspondence concerning this article should be addressed to Jaume Vives, Department of Psychobiology and Methodology of Health Science, Universitat Autònoma de Barcelona, UAB. E-mail: [jaume.vives@uab.cat](mailto:jaume.vives@uab.cat)

**REFERENCES**

1. Mokkink L, Terwee C, Stratford P, et al. Evaluation of the methodological quality of systematic reviews of health status measurement instruments. *Qual Life Res.* 2009;18(3):313-333. doi:10.1007/s11136-009-9451-9
2. Terwee C, Prinsen C, Ricci Garotti M, Suman A, de Vet HCW, Mokkink LB. The quality of systematic reviews of health-related outcome measurement instruments. *Qual Life Res.* 2016;25:767-779. doi:10.1007/s11136-015-1122-4
3. Prinsen C, Mokkink L, Bouter L, et al. COSMIN guideline for systematic reviews of Patient-Reported Outcome Measures. *Qual Life Res.* 2018;0(0):1-11. doi:10.1007/s11136-018-1798-3
4. Pussegoda K, Turner L, Garritty C, et al. Identifying approaches for assessing methodological and reporting quality of systematic reviews: A descriptive study. *Syst Rev.* 2017;6(1):1-12. doi:10.1186/s13643-017-0507-6
5. Pussegoda K, Turner L, Garritty C, et al. Systematic review adherence to methodological or reporting quality. *Syst Rev.* 2017;6(1):1-14. doi:10.1186/s13643-017-0527-2
6. Rosenkoetter U, Tate RL. Assessing Features of Psychometric Assessment Instruments: A Comparison of the COSMIN Checklist with Other Critical Appraisal Tools. *Brain Impair.* 2017:1-16. doi:10.1017/BrImp.2017.29
7. Reeve BB, Wyrwich KW, Wu AW, et al. ISOQOL recommends minimum standards for patient-reported outcome measures used in patient-centered outcomes and comparative effectiveness research. *Qual Life Res An Int J Qual Life Asp Treat Care Rehabil.* 2013;22(8):1889-1905. doi:10.1007/s11136-012-0344-y
8. Secretary's Advisory Committee on National Health Promotion and Disease Prevention Objectives. *Health-Related Quality of Life and Well-Being.*; 2010.



- 1  
2  
3 <https://www.healthypeople.gov/sites/default/files/HRQoLWBFullReport.pdf>.
- 4  
5  
6 9. Lorente S, Vives J, Viladrich C, Losilla J. Tools to assess the measurement properties  
7  
8 of quality of life instruments : a meta-review protocol. *BMJ Open*. 2018;8:1-4.  
9  
10 doi:10.1136/bmjopen-2018-022829
- 11  
12 10. Moher D, Liberati A, Tetzlaff J, Altman DG. Preferred Reporting Items for Systematic  
13  
14 Reviews and Meta-Analyses: The PRISMA Statement. *Ann Intern Med*.  
15  
16 2009;151(4):264-269. doi:10.1371/journal.pmed1000097
- 17  
18  
19 11. Liberati A, Altman DG, Tetzlaff J, et al. The PRISMA Statement for Reporting  
20  
21 Systematic Reviews and Meta-Analyses of Studies That Evaluate Health Care  
22  
23 Interventions : Explanation and Elaboration. *Ann Intern Med*. 2009;151(4):W65-W94.  
24  
25 doi:10.1371/journal.pmed.1000100
- 26  
27  
28 12. McGowan J, Sampson M, Salzwedel DM, Cogo E, Foerster V, Lefebvre C. PRESS  
29  
30 Peer Review of Electronic Search Strategies: 2015 Guideline Explanation and  
31  
32 Elaboration (PRESS E&E). *Cadth Methods Guidel*. 2016;(January):40-46.  
33  
34 doi:10.1016/j.jclinepi.2016.01.021
- 35  
36  
37 13. McGowan J, Sampson M, Salzwedel DM, Cogo E, Foerster V, Lefebvre C. PRESS  
38  
39 Peer Review of Electronic Search Strategies: 2015 Guideline Statement. *J Clin*  
40  
41 *Epidemiol*. 2016;75:40-46. doi:10.1016/j.jclinepi.2016.01.021
- 42  
43  
44 14. Terwee CB, Jansma EP, Riphagen II, De Vet H. Development of a methodological  
45  
46 PubMed search filter for finding studies on measurement properties of measurement  
47  
48 instruments. *Qual Life Res*. 2009;18(8):1115-1123. doi:10.1007/s11136-009-9528-5
- 49  
50  
51 15. Mokkink L, Terwee C, Patrick D, et al. *The COSMIN Checklist Manual*.; 2012.  
52  
53 [http://www.cosmin.nl/images/upload/files/COSMIN checklist manual v9.pdf](http://www.cosmin.nl/images/upload/files/COSMIN%20checklist%20manual%20v9.pdf).
- 54  
55  
56 16. Mokkink LB, Prinsen CA, Patrick DL, et al. COSMIN Methodology for systematic  
57  
58 reviews of Patient-Reported Outcome Measures (PROMs). User manual. 2018:1-78.  
59  
60

## TOOLS TO ASSESS HRQOL MEASUREMENT PROPERTIES

23

- 1  
2  
3 <http://www.cosmin.nl/>.
- 4  
5  
6 17. Terwee C, Bot S, de Boer M, et al. Quality criteria were proposed for measurement  
7  
8 properties of health status questionnaires. *J Clin Epidemiol*. 2007;60(1):34-42.  
9  
10 doi:10.1016/j.jclinepi.2006.03.012  
11
- 12 18. Aaronson N, Alonso J, Burnam A, et al. Assessing health status and quality-of-life  
13  
14 instruments and review criteria. *Qual Life Res*. 2002;11(3):193-215.  
15  
16
- 17 19. Lohr K, Aaronson N, Alonso J, Burnam M, Patrick D, Perrin E. Evaluating Quality of  
18  
19 Life and Health status instruments: development of scientific review criteria. *Clin*  
20  
21 *Ther*. 1996;18(5):979-992.  
22  
23
- 24 20. Brazier J, Deverill M, Green C, Harper R, Booth A. A review of the use of health  
25  
26 status measures in economic evaluation. *Health Technol Assess (Rockv)*. 1999;3(9).  
27  
28
- 29 21. Brazier J, Ratcliffe J. *The Measurement and Valuation of Health for Economic*  
30  
31 *Evaluation*. Vol 4. Second Edi. Elsevier; 2017. doi:[http://dx.doi.org/10.1016/B978-0-](http://dx.doi.org/10.1016/B978-0-12-803678-5.00457-4)  
32  
33 [12-803678-5.00457-4](http://dx.doi.org/10.1016/B978-0-12-803678-5.00457-4)  
34
- 35 22. Department of Health and Human Services. Guidance for Industry Patient-reported  
36  
37 Outcome measures: Use in Medical Product Development to Support Labeling Claims:  
38  
39 draft guidance. *Health Qual Life Outcomes*. 2006;20:1-20. doi:10.1186/1477-7525-4-  
40  
41 79  
42  
43
- 44 23. Department of Health and Human Services. *Guidance for Industry Patient-Reported*  
45  
46 *Outcome Measures: Use in Medical Product Development to Support Labeling*  
47  
48 *Claims.*; 2009. doi:10.1111/j.1524-4733.2009.00609.x  
49  
50
- 51 24. Fitzpatrick R, Davey C, Buxton MJ, Jones DR. *Evaluating Patient-Based Outcome*  
52  
53 *Measures for Use in Clinical Trials*. Vol 2.; 1998. doi:9812244  
54  
55
- 56 25. World Health Organization. International Classification of Functioning (ICF).  
57  
58 [www.who.int/classifications/icf/en/](http://www.who.int/classifications/icf/en/).  
59  
60

## TOOLS TO ASSESS HRQOL MEASUREMENT PROPERTIES

24

- 1  
2  
3 26. Valderas JM, Ferrer M, Mendivil J, et al. Development of EMPRO: A tool for the  
4  
5 standardized assessment of patient-reported outcome measures. *Value Heal*.  
6  
7 2008;11(4):700-708. doi:10.1111/j.1524-4733.2007.00309.x  
8  
9
- 10 27. Spinal Cord. Spinal Cord Injury Rehabilitation Evidence. <https://scireproject.com>.  
11
- 12 28. Johnston M V, Graves DE. Towards guidelines for evaluation of measures: An  
13  
14 introduction with application to spinal cord injury. *J Spinal Cord Med*. 2008;31(1):13-  
15  
16 26. doi:10.1080/10790268.2008.11753976  
17  
18
- 19 29. Andresen EM. Criteria for assessing the tools of disability outcomes research. *Arch*  
20  
21 *Phys Med Rehabil*. 2000;81(12 SUPPL. 2):15-20. doi:10.1053/apmr.2000.20619  
22  
23
- 24 30. Law M. *Outcome Measures Rating Form Guidelines*.; 2004.  
25  
26 <https://www.canchild.ca/system/tenon/assets/attachments/000/000/371/original/measg>  
27  
28 uid.pdf.  
29
- 30 31. OMERACT. Instrument selection for Core Outcome Measurement Sets. In:  
31  
32 *OMERACT Handbook*. ; 2019. <https://omeracthandbook.org/handbook>.  
33  
34
- 35 32. American Educational Research Association, American Psychological Association,  
36  
37 National Council on Measurement in Education. *Standards for Educational and*  
38  
39 *Psychological Testing*. American Educational Research Association.; 2014.  
40  
41
- 42 33. American Educational Research Association, American Psychological Association,  
43  
44 National Council on Measurement in Education. *Standards for Educational and*  
45  
46 *Psychological Testing*. American Educational Research Association.; 1999.  
47  
48
- 49 34. Cook DA, Beckman TJ. Current concepts in validity and reliability for psychometric  
50  
51 instruments: Theory and application. *Am J Med*. 2006;119(2):166.e7-166.e16.  
52  
53 doi:10.1016/j.amjmed.2005.10.036  
54  
55
- 56 35. McDowell I, Spassoff RA, Kristjansson B. On the classification of population health  
57  
58 measurements. *Am J Public Health*. 2004;94(3):1413-1448.  
59  
60

- 1  
2  
3 doi:10.1142/s0217751x95000681  
4  
5  
6 36. Garin O, Ferrer M, Pont À, et al. Disease-specific health-related quality of life  
7  
8 questionnaires for heart failure: A systematic review with meta-analyses. *Qual Life*  
9  
10 *Res.* 2009;18(1):71-85. doi:10.1007/s11136-008-9416-4  
11  
12 37. Speight J, Howarth A. Quality of life in restless legs syndrome: A systematic review of  
13  
14 clinical trials and a critical review of instruments. *Patient.* 2010;3(3):185-203.  
15  
16 doi:10.2165/11534390-000000000-00000  
17  
18 38. Chassany O, Holtmann G, Malagelada J, Gebauer U, Doerfler H, Devault K.  
19  
20 Systematic review: health-related quality of life (HRQOL) questionnaires in gastro-  
21  
22 oesophageal reflux disease. *Aliment Pharmacol Ther.* 2008;27(11):1053-1070.  
23  
24 doi:http://dx.doi.org/10.1111/j.1365-2036.2008.03683.x  
25  
26  
27 39. Beattie M, Lauder W, Atherton I, Murphy DJ. Instruments to measure patient  
28  
29 experience of health care quality in hospitals: a systematic review protocol. *Syst Rev.*  
30  
31 2014;3(1):4. doi:http://dx.doi.org/10.1186/2046-4053-3-4  
32  
33  
34 40. Lorente S, Losilla J-M, Vives J. Instruments to assess patient comfort during  
35  
36 hospitalization: A psychometric review. *J Adv Nurs.* 2018;74(5):1001-1015.  
37  
38 doi:10.1111/jan.13495  
39  
40  
41 41. Ferrando PJ, Anguiano-Carrasco C. A Structural Model-Based Optimal Person-Fit  
42  
43 Procedure for Identifying Faking. *Educ Psychol Meas.* 2012;73(2):173-190.  
44  
45 doi:10.1177/0013164412460049  
46  
47  
48 42. Ferrando PJ, Anguiano-Carrasco C. A structural equation model at the individual and  
49  
50 group level for assessing faking-related change. *Struct Equ Model.* 2011;18(1):91-109.  
51  
52 doi:10.1080/10705511.2011.532725  
53  
54  
55 43. Higgins JPT, Altman DG, Gøtzsche PC, et al. The Cochrane Collaboration's tool for  
56  
57 assessing risk of bias in randomised trials. *BMJ.* 2011;343(7829):1-9.  
58  
59  
60

- 1  
2  
3 doi:10.1136/bmj.d5928  
4  
5  
6 44. Wells G, Shea B, O'Connell D, et al. The Newcastle-Otawa Scale (NOS) for assessing  
7 the quality of nonrandomised studies in meta-analyses 2000.  
8  
9 www.ohri.ca/programs/clinical\_epidemiology/oxford.asp.  
10  
11  
12 45. Jarde A, Losilla J-M, Vives J, Rodrigo MF. Q-Coh : A tool to screen the  
13 methodological quality of cohort studies in systematic reviews and meta-analyses. *Int J*  
14 *Clin Heal Psychol*. 2013;13(2):138-146. doi:10.1016/S1697-2600(13)70017-6  
15  
16  
17 46. Jarde A, Losilla J-M, Oliveras I, Vives J. Quality assessment tool for cohort studies (Q-  
18 COH II) User's manual. 2014:1-13.  
19  
20  
21  
22  
23  
24  
25  
26  
27  
28  
29  
30  
31  
32  
33  
34  
35  
36  
37  
38  
39  
40  
41  
42  
43  
44  
45  
46  
47  
48  
49  
50  
51  
52  
53  
54  
55  
56  
57  
58  
59  
60

## TOOLS TO ASSESS HRQOL MEASUREMENT PROPERTIES

27

Table 1. Quality of review process of systematic reviews

|                                                                    | 2008-2019 |      | 2014-2019 |      |
|--------------------------------------------------------------------|-----------|------|-----------|------|
|                                                                    | n         | %    | n         | %    |
| Protocol registered prospectively                                  |           |      |           |      |
| • Yes, PROSPERO                                                    | 18        | 8.0  | 17        | 16.0 |
| • No registered                                                    | 208       | 92.0 | 89        | 84.0 |
| Standards of systematic review reporting and/or quality assessment |           |      |           |      |
| • Yes (AMSTAR, PRISMA, QUOROM...)                                  | 64        | 28.3 | 48        | 45.3 |
| • No                                                               | 162       | 71.7 | 58        | 54.7 |
| Standards to assess reporting and/or quality assessment of primary |           |      |           |      |
| • Yes (QUADAS, STARD...)                                           | 33        | 14.6 | 20        | 18.9 |
| • No                                                               | 193       | 85.4 | 86        | 81.1 |
| Number of databases searched                                       |           |      |           |      |
| • 1-3                                                              | 87        | 38.5 | 41        | 38.7 |
| • 4-6                                                              | 98        | 43.4 | 52        | 49.0 |
| • 7-9                                                              | 21        | 9.3  | 7         | 6.6  |
| • >=10                                                             | 17        | 7.5  | 5         | 4.7  |
| • Not reported                                                     | 3         | 1.3  | 1         | 0.9  |
| Other sources                                                      |           |      |           |      |
| • Official websites/Internet                                       | 25        | 11.1 | 7         | 3.8  |
| • Virtual libraries                                                | 22        | 9.7  | 10        | 9.4  |
| • Google/Google Scholar                                            | 20        | 8.9  | 9         | 8.5  |
| • Scientific journals/Thesis                                       | 6         | 2.7  | 2         | 1.9  |
| Search strategy                                                    |           |      |           |      |
| Terms, databases, time period                                      |           |      |           |      |
| • Yes                                                              | 218       | 96.5 | 103       | 97.1 |
| • No                                                               | 8         | 3.5  | 3         | 2.9  |
| Search syntax                                                      |           |      |           |      |
| • Detailed syntax reported (Truncations, Booleans...)              | 99        | 43.8 | 62        | 58.5 |
| • Syntax not reported or not detailed enough to be replicable      | 122       | 54.0 | 43        | 40.6 |
| • Supplementary file under request (not available)                 | 5         | 2.2  | 1         | 0.9  |
| Inclusion / Exclusion selection criteria                           |           |      |           |      |
| • Reported and well-defined                                        | 209       | 92.5 | 102       | 96.2 |
| • Not reported or not clearly stated                               | 17        | 7.5  | 4         | 3.8  |
| Article selection                                                  |           |      |           |      |
| • By 2 or more independent reviewers                               | 117       | 51.8 | 70        | 66.0 |
| • Not reported or not clearly stated                               | 109       | 48.2 | 36        | 34.0 |
| Flow chart                                                         |           |      |           |      |
| • Yes                                                              | 148       | 65.5 | 90        | 84.9 |
| • No                                                               | 78        | 34.4 | 16        | 15.1 |
| Funding                                                            |           |      |           |      |
| • Reported                                                         | 127       | 56.2 | 64        | 60.4 |
| • Not reported or not clearly stated                               | 99        | 43.8 | 42        | 39.6 |
| TOTAL                                                              | 226       | 100  | 106       | 100  |

PROSPERO= Prospective Register of Systematic Reviews; AMSTAR=Assessment of Multiple Systematic reviews; PRISMA= Preferred Reporting Items for Systematic Reviews and Meta-Analyses; QUOROM=Quality of Reporting of Meta-analysis; QUADAS= Quality Assessment of Diagnostic Accuracy Studies; STARD= Standards for the Reporting of Diagnostic Accuracy Studies; n= frequency; %= percentage

## TOOLS TO ASSESS HRQOL MEASUREMENT PROPERTIES

Table 2. Tools to assess measurement properties. Characteristics and comparison to Testing Standards

| Tools                         | 1)COSMIN                                                                                   | 2)TERWEE'S CRITERIA                                                         | 3)ATTRIBUTES & CRITERIA                                                                   | 4)ECONOMIC EVALUATION                                                            | 5)GUIDANCE FOR INDUSTRY                                                                                                                            | 6)FITZPATRICK'S CRITERIA                                                                                            | 7)ICF ICFCY                      | 8)EMPRO                                                              | 9)SCI CRITERIA                                                                                                   | 10)ANDRESEN'S TOOL                                                                   | 11)CANCHILD OUTCOMES                                                                                    | 12)OMERACT                                                                                                                   | 13)TESTING STANDARDS                                                                                                                                                       |
|-------------------------------|--------------------------------------------------------------------------------------------|-----------------------------------------------------------------------------|-------------------------------------------------------------------------------------------|----------------------------------------------------------------------------------|----------------------------------------------------------------------------------------------------------------------------------------------------|---------------------------------------------------------------------------------------------------------------------|----------------------------------|----------------------------------------------------------------------|------------------------------------------------------------------------------------------------------------------|--------------------------------------------------------------------------------------|---------------------------------------------------------------------------------------------------------|------------------------------------------------------------------------------------------------------------------------------|----------------------------------------------------------------------------------------------------------------------------------------------------------------------------|
| <b>Development</b>            | Delphi                                                                                     | Author criteria                                                             | Expert panel                                                                              | Literature                                                                       | Consensus                                                                                                                                          | Literature                                                                                                          |                                  | Expert panel                                                         | Expert panel Literature                                                                                          | Literature                                                                           | Expert panel                                                                                            | Expert Panel Delphi                                                                                                          | Consensus                                                                                                                                                                  |
| <b>Sponsor/s</b>              | COSMIN Initiative                                                                          | Author                                                                      | SACMOT Working group                                                                      | Standing Group of Health Technology                                              | FDA Staff                                                                                                                                          | Standing Group of Health Technology                                                                                 | WHO Member States                | IRYSS Committee                                                      | SCIRE Working group                                                                                              | Author                                                                               | CanChild Center Staff                                                                                   | OMERACT Initiative                                                                                                           | AERA, APA NCME                                                                                                                                                             |
| <b>Approval Updates</b>       | 2010<br>2018                                                                               | 2007                                                                        | 1996<br>2002, 2013                                                                        | 1999<br>2017                                                                     | 2006<br>2009                                                                                                                                       | 1998                                                                                                                | 2001<br>2019 <sup>a</sup>        | 2008                                                                 | 2008, 2016                                                                                                       | 2000                                                                                 | 1987 <sup>b</sup><br>2004                                                                               | 1992<br>1998,2007,2014,<br>2019                                                                                              | 1954<br>1966, 1974, 1985,<br>1999, 2014                                                                                                                                    |
| <b>Items (scoring)</b>        | 5-18 items/box (+/-/?)                                                                     | 8-9 items total (+/-/?)                                                     | Not item structured (no scoring)                                                          | Not item structured (no scoring)                                                 | Not item structured (no scoring)                                                                                                                   | Not item structured (no scoring)                                                                                    | Not item structured (no scoring) | 39 items(strongly agree, agree, disagree, strongly disagree)         | 3-5 items/box (++++/+++ / ++/+)                                                                                  | 11 items total (A, B, C)                                                             | 2-6 items/box (excellent, adequate, poor)                                                               | 2-5 items/box (Green, amber, red, white)                                                                                     | Not item structured (no scoring)                                                                                                                                           |
| <b>Measurement properties</b> | Content Construct (Int.Structure Cross-Cultural Hypotheses test) Criterion (Gold standard) | Content Construct (Hypotheses test) Criterion (Gold standard) Floor/Ceiling | Conceptual & measurement model Face Construct (Hypotheses test) Criterion (Gold standard) | Descriptive (Content Construct) Preference-based valuation Empirical (Criterion) | Conceptual model Content Construct (Hypothesis test, Discriminant, Convergent, Known groups) Criterion (Gold standard, sensitivity) Responsiveness | Purpose Content/Face Construct (Convergent, Discriminant, Int.Structure) Criterion (Predictive) Cut-score precision | Content                          | Conceptual & measurement model Construct (Hypotheses test) Criterion | Content Criterion (Concurrent Predictive "Discriminant") Clinical utility (Consequential validity) Floor/Ceiling | Conceptual & measurement model Instrument bias Int.Structure Convergent Discriminant | Purpose Scale construction Content Construct (Hypotheses test) Criterion (Gold standard) Responsiveness | Content, Face Construct (Convergent, Divergent) Criterion (Accuracy) Discrimination (Sensitivity over time & over treatment) | Content Response process Int. Structure (Dimensions, DIF) Relations to other variables (Hypotheses test, Convergent, Discriminant, Criterion, Responsiveness) Consequences |
| <b>Validity</b>               |                                                                                            |                                                                             |                                                                                           |                                                                                  |                                                                                                                                                    |                                                                                                                     |                                  |                                                                      |                                                                                                                  |                                                                                      |                                                                                                         |                                                                                                                              |                                                                                                                                                                            |
| <b>Reliability</b>            | Int. Consistency Measurement error (Test retest, Agreement)                                | Int.Consistency Reproducibility (Agreement, Relative measurement error)     | Int.Consistency Reproducibility (Test retest, inter-rater)                                | Test retest Inter-rater                                                          | Test retest Inter-rater Int.Consistency                                                                                                            | Int.Consistency Reproducibility (Test retest)                                                                       |                                  | Int.Consistency Reproducibility (Test retest, Inter-rater)           | Int.Consistency Test retest                                                                                      | Int.Consistency Test retest                                                          | Int.Consistency Intra/Inter-rater Test retest                                                           | Reproducibility Test retest                                                                                                  | Int.Consistency Test retest Alternate forms Scorers & Decision consistency/accuracy                                                                                        |
| <b>Fairness</b>               |                                                                                            |                                                                             |                                                                                           |                                                                                  |                                                                                                                                                    |                                                                                                                     |                                  |                                                                      |                                                                                                                  |                                                                                      |                                                                                                         |                                                                                                                              | Equivalence of accommodations                                                                                                                                              |
| <b>Other characteristics</b>  |                                                                                            |                                                                             |                                                                                           |                                                                                  |                                                                                                                                                    |                                                                                                                     |                                  |                                                                      | Norms                                                                                                            | Norms, Standard values                                                               | Norms Standardization                                                                                   |                                                                                                                              | Scales, norms, Score comparability                                                                                                                                         |
|                               | Interpretability                                                                           | Interpretability                                                            | Interpretability                                                                          |                                                                                  | Interpretability                                                                                                                                   | Interpretability                                                                                                    |                                  | Interpretability                                                     |                                                                                                                  |                                                                                      |                                                                                                         |                                                                                                                              | Test development and revision                                                                                                                                              |
|                               |                                                                                            |                                                                             | Burden                                                                                    |                                                                                  | Burden                                                                                                                                             | Acceptability (Burden)                                                                                              |                                  | Burden                                                               | Burden                                                                                                           | Burden                                                                               |                                                                                                         |                                                                                                                              |                                                                                                                                                                            |
|                               |                                                                                            |                                                                             | Administration Accessible forms                                                           |                                                                                  | Administration Accessible forms                                                                                                                    |                                                                                                                     |                                  | Administration                                                       | Administration Accessible forms                                                                                  | Administration Accessible forms                                                      |                                                                                                         |                                                                                                                              |                                                                                                                                                                            |
|                               |                                                                                            |                                                                             | Cultural Adaptations                                                                      | Practicality                                                                     |                                                                                                                                                    | Feasibility Cultural Adaptations                                                                                    |                                  | Cultural Adaptations                                                 | Applicability Cultural Adaptations                                                                               | Cultural Adaptations                                                                 | Clinical utility (Feasibility)                                                                          | Feasibility                                                                                                                  |                                                                                                                                                                            |
| <b>Frequency of use (%)</b>   | 49 (21.8)                                                                                  | 42 (18.6)                                                                   | 33 (14.6)                                                                                 | 17 (7.5)                                                                         | 14 (6.2)                                                                                                                                           | 14 (6.2)                                                                                                            | 7 (3.1)                          | 4 (1.8)                                                              | 2 (0.9)                                                                                                          | 2 (0.9)                                                                              | 1(0.4)                                                                                                  | 1 (0.4)                                                                                                                      | 0                                                                                                                                                                          |

Note: DIF= Differential Item Functioning; %=Percentage; Invariance=Measurement invariance; Int.Structure= Internal Structure; Int. Consistency= Internal Consistency; AERA= American Educational Research Association; APA= American Psychological Association; NCME= National Council on Measurement in Education; SACMOT= Scientific Advisory Committee Medical Outcomes Trust; FDA= Food and Drug Administration; WHO= World Health Organization; IRYSS= Spanish Cooperative Investigation Network for Health and Health Service Outcomes Research; SCIRE= Spinal Cord Injury Rehabilitation Evidence; COSMIN=Consensus Standards for Selection of Health Measurement Instruments; TERWEE'S CRITERIA= Quality Criteria for Measurement Properties; ATTRIBUTES&CRITERIA= Attributes and Criteria to assess Health Status and Quality of Life Instruments; ECONOMIC EVALUATION= Health Status Measures in Economic Evaluation; GUIDANCE FOR INDUSTRY=Guidance for Industry patient-reported outcomes measures; FITZPATRICK'S CRITERIA=Evaluating patient-based outcomes measures for use in clinical trials.; ICF= International Classification of Functioning; ICFCY= International Classification of Functioning for Children and Youth; EMPRO= Evaluating Measures of Patient Reported Outcomes; SCI CRITERIA= Spinal Cord Injury guidelines; ANDRESEN'S TOOL=Criteria for Assessing the Tools of Disability Outcomes Research; CANCHILD OUTCOMES= CanChild Outcomes Measures; OMERACT= Outcomes Measures in Rheumatology Clinical Trials; TESTING STANDARDS= Standards for Educational and Psychological Testing. See text for references.

<sup>a</sup>Updated version at website, <sup>b</sup> Reference at 2004

## TOOLS TO ASSESS HRQOL MEASUREMENT PROPERTIES

29

Table 3. Intended purpose of instruments and their association to measurement properties

| <b>Purposes of instruments identified across the systematic reviews</b>        |                                                                                                                                                                                            | <b>Frequency</b> | <b>% (Over 226)</b> |
|--------------------------------------------------------------------------------|--------------------------------------------------------------------------------------------------------------------------------------------------------------------------------------------|------------------|---------------------|
| Evaluative (Change scores pre-post studies. Effectiveness of an intervention)  |                                                                                                                                                                                            | 168              | 74.3                |
| Impact of disease on HROQL (disease symptoms, burden...)                       |                                                                                                                                                                                            | 127              | 56.2                |
| Analytic (Health policies. Cost-effectiveness. Funding)                        |                                                                                                                                                                                            | 33               | 14.6                |
| Diagnostic (Distinguish between groups, levels of severity...)                 |                                                                                                                                                                                            | 16               | 7.1                 |
| Descriptive (Health measures in surveys. Needs of groups of people)            |                                                                                                                                                                                            | 4                | 1.8                 |
| Predictive (Anticipation of future health status. Risk factors. Risk profiles) |                                                                                                                                                                                            | 1                | 0.4                 |
| Purpose no reported or no clearly stated                                       |                                                                                                                                                                                            | 6                | 2.7                 |
| <b>Conclusions according to the purpose of instruments</b>                     |                                                                                                                                                                                            | <b>n</b>         | <b>% (Over 226)</b> |
| Yes, reviewers made specific conclusions                                       |                                                                                                                                                                                            | 60               | 26.5                |
| No, reviewers made general conclusions                                         |                                                                                                                                                                                            | 166              | 73.5                |
| <b>Measurement properties associated to the purpose of the instrument</b>      |                                                                                                                                                                                            | <b>n</b>         | <b>% (Over 60)</b>  |
| Evaluative                                                                     | Responsiveness / Conceptual and Measurement Model / Content validity / Reliability (internal consistency, test retest) / Respondent Burden / Convergent validity / Cross cultural validity | 39               | 65.0                |
| Impact                                                                         | Conceptual and Measurement Model / Content validity                                                                                                                                        | 23               | 38.3                |
| Analytic                                                                       | Preference-based valuation / Agreement                                                                                                                                                     | 10               | 4.4                 |
| Diagnostic                                                                     | Known groups validity / Test retest                                                                                                                                                        | 7                | 3.1                 |

Note: (%) =Percentage



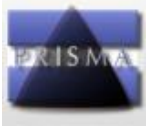

## PRISMA 2009 Flow Diagram

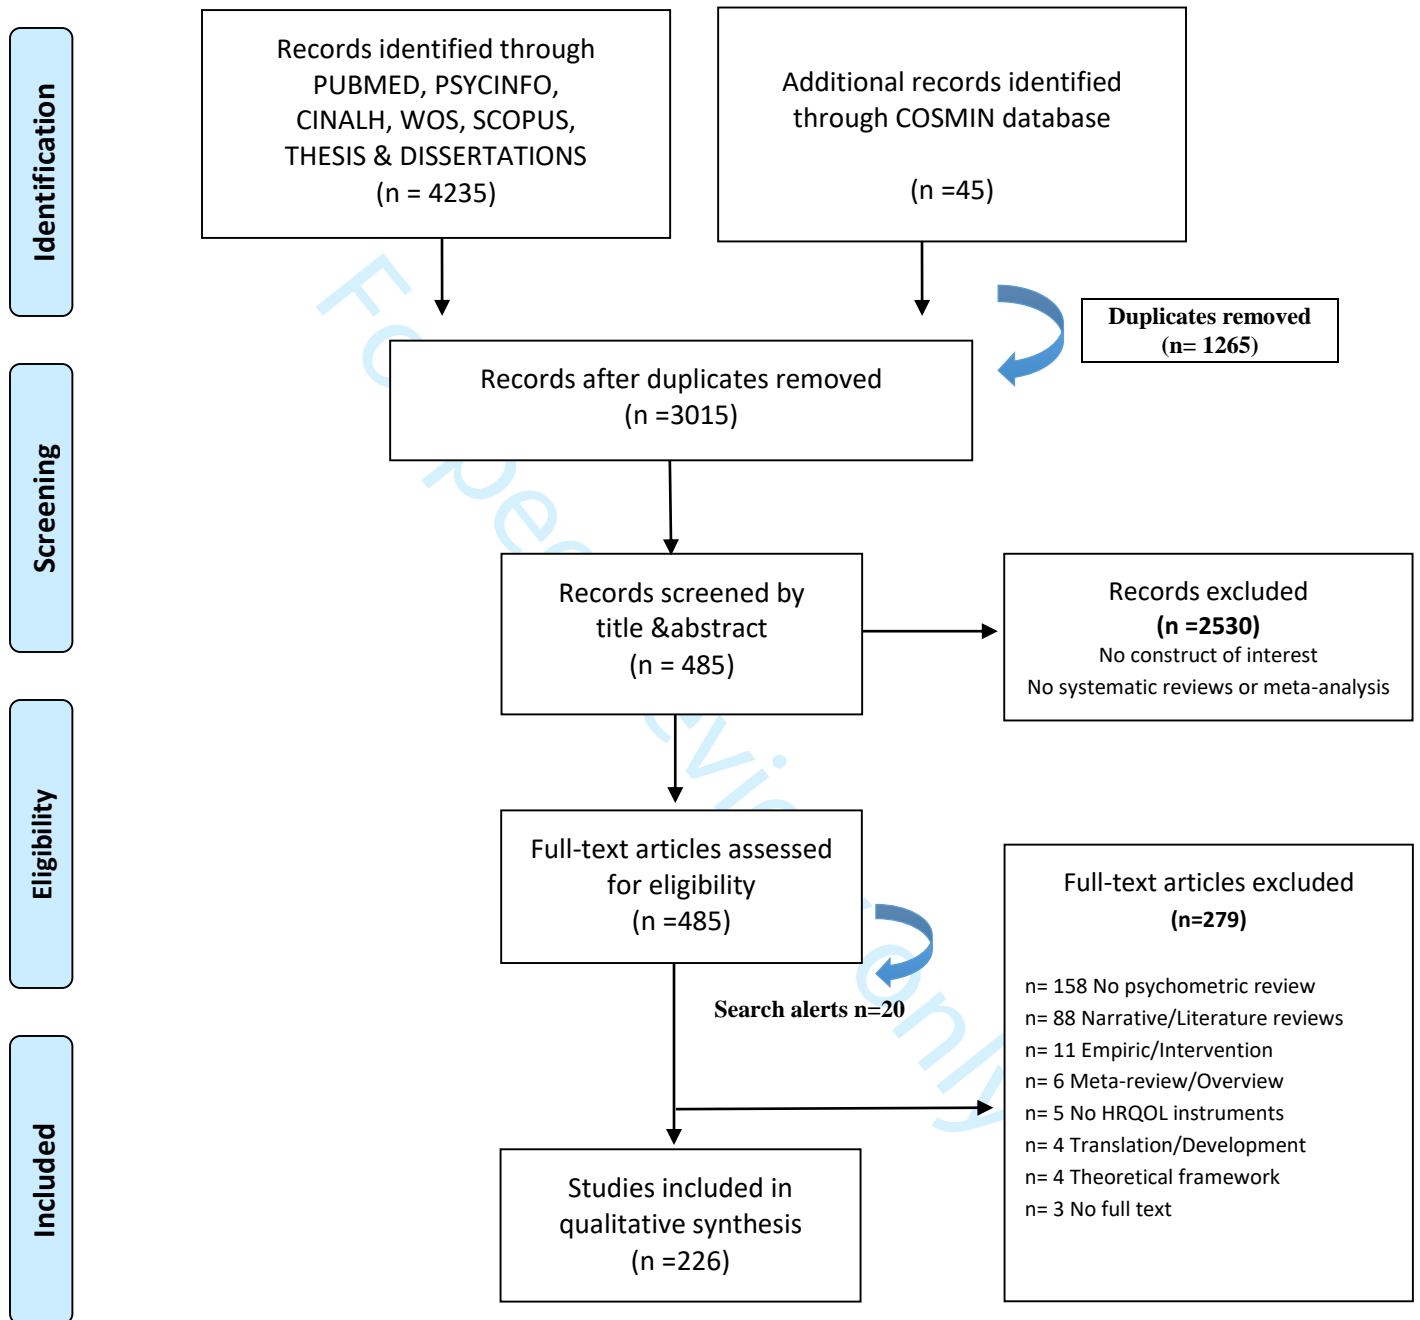

From: Moher D, Liberati A, Tetzlaff J, Altman DG, The PRISMA Group (2009). Preferred Reporting Items for Systematic Reviews and Meta-Analyses: The PRISMA Statement. PLoS Med 6(6): e1000097. doi:10.1371/journal.pmed1000097

For more information, visit [www.prisma-statement.org](http://www.prisma-statement.org).

For peer review only - <http://bmjopen.bmj.com/site/about/guidelines.xhtml>

## Supplementary File S1. Search strategy

## Search strings for Pubmed

|    |                                                                                                                                                                                                                                                                                                                                                                                                                                                                                                                                                                                                                                                                                                                                                                                                                                                                                                                                                                                                                                                                                                                                                                                                                                                                                                                                                                                                                                                                                                                                                                                                                                                                                                                                                                                                                                                                                                                                                                                                                                                                                                                                                                                                                                                                                                                                                                                                                                                                                                                                                                                                                                                                                                                                                                                                                                                                                                                                                                                                                                                                                                                                                                                                                                                                                                                                                                                                                                                                                                                                                                                                                                                                                                                                                                        |
|----|------------------------------------------------------------------------------------------------------------------------------------------------------------------------------------------------------------------------------------------------------------------------------------------------------------------------------------------------------------------------------------------------------------------------------------------------------------------------------------------------------------------------------------------------------------------------------------------------------------------------------------------------------------------------------------------------------------------------------------------------------------------------------------------------------------------------------------------------------------------------------------------------------------------------------------------------------------------------------------------------------------------------------------------------------------------------------------------------------------------------------------------------------------------------------------------------------------------------------------------------------------------------------------------------------------------------------------------------------------------------------------------------------------------------------------------------------------------------------------------------------------------------------------------------------------------------------------------------------------------------------------------------------------------------------------------------------------------------------------------------------------------------------------------------------------------------------------------------------------------------------------------------------------------------------------------------------------------------------------------------------------------------------------------------------------------------------------------------------------------------------------------------------------------------------------------------------------------------------------------------------------------------------------------------------------------------------------------------------------------------------------------------------------------------------------------------------------------------------------------------------------------------------------------------------------------------------------------------------------------------------------------------------------------------------------------------------------------------------------------------------------------------------------------------------------------------------------------------------------------------------------------------------------------------------------------------------------------------------------------------------------------------------------------------------------------------------------------------------------------------------------------------------------------------------------------------------------------------------------------------------------------------------------------------------------------------------------------------------------------------------------------------------------------------------------------------------------------------------------------------------------------------------------------------------------------------------------------------------------------------------------------------------------------------------------------------------------------------------------------------------------------------|
| 1  | ("Quality of Life"[Mesh] OR HRQL[tiab] OR HRQoL[tiab] OR QoL[tiab] OR "quality of life"[tiab])                                                                                                                                                                                                                                                                                                                                                                                                                                                                                                                                                                                                                                                                                                                                                                                                                                                                                                                                                                                                                                                                                                                                                                                                                                                                                                                                                                                                                                                                                                                                                                                                                                                                                                                                                                                                                                                                                                                                                                                                                                                                                                                                                                                                                                                                                                                                                                                                                                                                                                                                                                                                                                                                                                                                                                                                                                                                                                                                                                                                                                                                                                                                                                                                                                                                                                                                                                                                                                                                                                                                                                                                                                                                         |
| 2  | (instrument[tiab] OR instruments[tiab] OR questionnaire[tiab] OR questionnaires[tiab] OR scale[tiab] OR scales[tiab] OR tool[tiab] OR tools[tiab])                                                                                                                                                                                                                                                                                                                                                                                                                                                                                                                                                                                                                                                                                                                                                                                                                                                                                                                                                                                                                                                                                                                                                                                                                                                                                                                                                                                                                                                                                                                                                                                                                                                                                                                                                                                                                                                                                                                                                                                                                                                                                                                                                                                                                                                                                                                                                                                                                                                                                                                                                                                                                                                                                                                                                                                                                                                                                                                                                                                                                                                                                                                                                                                                                                                                                                                                                                                                                                                                                                                                                                                                                     |
| 3  | (Validation Studies[pt] OR "reproducibility of results"[MeSH Terms] OR reproducib*[tiab] OR "psychometrics"[MeSH] OR psychometr*[tiab] OR clinimetr*[tiab] OR clinometr*[tiab] OR "observer variation"[MeSH] OR observer variation[tiab] OR "discriminant analysis"[MeSH] OR reliab*[tiab] OR valid*[tiab] OR coefficient[tiab] OR "internal consistency"[tiab] OR (cronbach*[tiab] AND (alpha[tiab] OR alphas[tiab])) OR "item correlation"[tiab] OR "item correlations"[tiab] OR "item selection"[tiab] OR "item selections"[tiab] OR "item reduction"[tiab] OR "item reductions"[tiab] OR agreement[tw] OR precision[tw] OR imprecision[tw] OR "precise values"[tw] OR test-retest [tiab] OR (test[tiab] AND retest[tiab]) OR (reliab*[tiab] AND (test[tiab] OR retest[tiab])) OR stability[tiab] OR interrater[tiab] OR inter-rater[tiab] OR intrarater[tiab] OR intra-rater[tiab] OR intertester[tiab] OR inter-tester[tiab] OR intratester[tiab] OR intra-tester[tiab] OR interobserver[tiab] OR inter-observer[tiab] OR intraobserver[tiab] OR intra-observer[tiab] OR intertechnician[tiab] OR inter-technician[tiab] OR intratechnician[tiab] OR intra-technician[tiab] OR interexaminer[tiab] OR inter-examiner[tiab] OR intraexaminer[tiab] OR intra-examiner[tiab] OR interassay[tiab] OR inter-assay[tiab] OR intraassay[tiab] OR intra-assay[tiab] OR interindividual[tiab] OR inter-individual[tiab] OR intraindividual[tiab] OR intra-individual[tiab] OR interparticipant[tiab] OR inter-participant[tiab] OR intraparticipant[tiab] OR intra-participant[tiab] OR kappa[tiab] OR "kappa's"[tiab] OR kappas[tiab] OR "coefficient of variation"[tiab] OR repeatab*[tw] OR ((replicab*[tw] OR repeated[tw]) AND (measure[tw] OR measures[tw] OR findings[tw] OR result[tw] OR results[tw] OR test[tw] OR tests[tw])) OR generaliza*[tiab] OR generalisa*[tiab] OR concordance[tiab] OR (intraclass[tiab] AND correlation*[tiab]) OR discriminative[tiab] OR "known group"[tiab] OR "factor analysis"[tiab] OR "factor analyses"[tiab] OR "factor structure"[tiab] OR "factor structure"[tiab] OR dimensionality[tiab] OR subscale*[tiab] OR "multitrait scaling analysis"[tiab] OR "multitrait scaling analyses"[tiab] OR "item discriminant"[tiab] OR "interscale correlation"[tiab] OR "interscale correlations"[tiab] OR ((error[tiab] OR errors[tiab]) AND (measure*[tiab] OR correlat*[tiab] OR evaluat*[tiab] OR accuracy[tiab] OR accurate[tiab] OR precision[tiab] OR mean[tiab])) OR "individual variability"[tiab] OR "interval variability"[tiab] OR "rate variability"[tiab] OR "variability analysis"[tiab] OR (uncertainty[tiab] AND (measurement[tiab] OR measuring[tiab])) OR "standard error of measurement"[tiab] OR sensitiv*[tiab] OR responsive*[tiab] OR (limit[tiab] AND detection[tiab]) OR "minimal detectable concentration"[tiab] OR interpretab*[tiab] OR (small*[tiab] AND (real[tiab] OR detectable[tiab]) AND (change[tiab] OR difference[tiab])) OR "meaningful change"[tiab] OR "minimal important change"[tiab] OR "minimal important difference"[tiab] OR "minimally important change"[tiab] OR "minimally important difference"[tiab] OR "minimal detectable change"[tiab] OR "minimal detectable difference"[tiab] OR "minimally detectable change"[tiab] OR "minimally detectable difference"[tiab] OR "minimal real change"[tiab] OR "minimal real difference"[tiab] OR "minimally real change"[tiab] OR "minimally real difference"[tiab] OR "ceiling effect"[tiab] OR "floor effect"[tiab] OR "Item response model"[tiab] OR IRT[tiab] OR Rasch[tiab] OR "Differential item functioning"[tiab] OR DIF [tiab] OR "computer adaptive testing"[tiab] OR "item bank"[tiab] OR "cross-cultural equivalence"[tiab]) |
| 4  | #1 AND #2 AND #3                                                                                                                                                                                                                                                                                                                                                                                                                                                                                                                                                                                                                                                                                                                                                                                                                                                                                                                                                                                                                                                                                                                                                                                                                                                                                                                                                                                                                                                                                                                                                                                                                                                                                                                                                                                                                                                                                                                                                                                                                                                                                                                                                                                                                                                                                                                                                                                                                                                                                                                                                                                                                                                                                                                                                                                                                                                                                                                                                                                                                                                                                                                                                                                                                                                                                                                                                                                                                                                                                                                                                                                                                                                                                                                                                       |
| 5  | ("protocol"[ti] OR "addresses"[Publication Type] OR "biography"[Publication Type] OR "case reports"[Publication Type] OR "comment"[Publication Type] OR "directory"[Publication Type] OR "editorial"[Publication Type] OR "festschrift"[Publication Type] OR "interview"[Publication Type] OR "lectures"[Publication Type] OR "legal cases"[Publication Type] OR "legislation"[Publication Type] OR "letter"[Publication Type] OR "news"[Publication Type] OR "newspaper article"[Publication Type] OR "patient education handout"[Publication Type] OR "popular works"[Publication Type] OR "congresses"[Publication Type] OR "consensus development conference"[Publication Type] OR "consensus development conference"[Publication Type] OR "practice guideline"[Publication Type])                                                                                                                                                                                                                                                                                                                                                                                                                                                                                                                                                                                                                                                                                                                                                                                                                                                                                                                                                                                                                                                                                                                                                                                                                                                                                                                                                                                                                                                                                                                                                                                                                                                                                                                                                                                                                                                                                                                                                                                                                                                                                                                                                                                                                                                                                                                                                                                                                                                                                                                                                                                                                                                                                                                                                                                                                                                                                                                                                                                 |
| 6  | #4 NOT #5                                                                                                                                                                                                                                                                                                                                                                                                                                                                                                                                                                                                                                                                                                                                                                                                                                                                                                                                                                                                                                                                                                                                                                                                                                                                                                                                                                                                                                                                                                                                                                                                                                                                                                                                                                                                                                                                                                                                                                                                                                                                                                                                                                                                                                                                                                                                                                                                                                                                                                                                                                                                                                                                                                                                                                                                                                                                                                                                                                                                                                                                                                                                                                                                                                                                                                                                                                                                                                                                                                                                                                                                                                                                                                                                                              |
| 7  | FILTER: Article Type (Review or Systematic Review)                                                                                                                                                                                                                                                                                                                                                                                                                                                                                                                                                                                                                                                                                                                                                                                                                                                                                                                                                                                                                                                                                                                                                                                                                                                                                                                                                                                                                                                                                                                                                                                                                                                                                                                                                                                                                                                                                                                                                                                                                                                                                                                                                                                                                                                                                                                                                                                                                                                                                                                                                                                                                                                                                                                                                                                                                                                                                                                                                                                                                                                                                                                                                                                                                                                                                                                                                                                                                                                                                                                                                                                                                                                                                                                     |
| 8  | FILTER: Subject (Systematic Review)                                                                                                                                                                                                                                                                                                                                                                                                                                                                                                                                                                                                                                                                                                                                                                                                                                                                                                                                                                                                                                                                                                                                                                                                                                                                                                                                                                                                                                                                                                                                                                                                                                                                                                                                                                                                                                                                                                                                                                                                                                                                                                                                                                                                                                                                                                                                                                                                                                                                                                                                                                                                                                                                                                                                                                                                                                                                                                                                                                                                                                                                                                                                                                                                                                                                                                                                                                                                                                                                                                                                                                                                                                                                                                                                    |
| 9  | FILTER: Language (English)                                                                                                                                                                                                                                                                                                                                                                                                                                                                                                                                                                                                                                                                                                                                                                                                                                                                                                                                                                                                                                                                                                                                                                                                                                                                                                                                                                                                                                                                                                                                                                                                                                                                                                                                                                                                                                                                                                                                                                                                                                                                                                                                                                                                                                                                                                                                                                                                                                                                                                                                                                                                                                                                                                                                                                                                                                                                                                                                                                                                                                                                                                                                                                                                                                                                                                                                                                                                                                                                                                                                                                                                                                                                                                                                             |
| 10 | FILTER: Period (2008-2018)                                                                                                                                                                                                                                                                                                                                                                                                                                                                                                                                                                                                                                                                                                                                                                                                                                                                                                                                                                                                                                                                                                                                                                                                                                                                                                                                                                                                                                                                                                                                                                                                                                                                                                                                                                                                                                                                                                                                                                                                                                                                                                                                                                                                                                                                                                                                                                                                                                                                                                                                                                                                                                                                                                                                                                                                                                                                                                                                                                                                                                                                                                                                                                                                                                                                                                                                                                                                                                                                                                                                                                                                                                                                                                                                             |

## Search strings for CINAHL

|   |                                                                                                                                                                                                                                                                                                                                                                                                                                                                                                                                                                                                                                                                                                                                                                                                                                                                                                                                                                                                                                                                                                                                                                                                                                                                                                                                                                                                                                                                                                                                                                                                                                                                                                                                                                                                                                                                                                                                                                                                                                                                                                                                                                                                                                                                                                                                                                                                                                                                                                                                                                                                                                                                                                                                                                                                                                                                                                                                                                                                                                                                                                                                                                                                                                                                                                                                                                                                                                                                                                                                                                                                                                                                                                                                                                                                                                                                                                                                                                                                                                                                                                                                                                                                                                                                                                                                                                                                                                                                                                                                                                                                                                                                                                                                                                                                                                                                                                                                                                                                                                                                                                                                                                                                                                                                                                                                                                                                                                                                                                                                                                                                                                                                                                                                            |
|---|--------------------------------------------------------------------------------------------------------------------------------------------------------------------------------------------------------------------------------------------------------------------------------------------------------------------------------------------------------------------------------------------------------------------------------------------------------------------------------------------------------------------------------------------------------------------------------------------------------------------------------------------------------------------------------------------------------------------------------------------------------------------------------------------------------------------------------------------------------------------------------------------------------------------------------------------------------------------------------------------------------------------------------------------------------------------------------------------------------------------------------------------------------------------------------------------------------------------------------------------------------------------------------------------------------------------------------------------------------------------------------------------------------------------------------------------------------------------------------------------------------------------------------------------------------------------------------------------------------------------------------------------------------------------------------------------------------------------------------------------------------------------------------------------------------------------------------------------------------------------------------------------------------------------------------------------------------------------------------------------------------------------------------------------------------------------------------------------------------------------------------------------------------------------------------------------------------------------------------------------------------------------------------------------------------------------------------------------------------------------------------------------------------------------------------------------------------------------------------------------------------------------------------------------------------------------------------------------------------------------------------------------------------------------------------------------------------------------------------------------------------------------------------------------------------------------------------------------------------------------------------------------------------------------------------------------------------------------------------------------------------------------------------------------------------------------------------------------------------------------------------------------------------------------------------------------------------------------------------------------------------------------------------------------------------------------------------------------------------------------------------------------------------------------------------------------------------------------------------------------------------------------------------------------------------------------------------------------------------------------------------------------------------------------------------------------------------------------------------------------------------------------------------------------------------------------------------------------------------------------------------------------------------------------------------------------------------------------------------------------------------------------------------------------------------------------------------------------------------------------------------------------------------------------------------------------------------------------------------------------------------------------------------------------------------------------------------------------------------------------------------------------------------------------------------------------------------------------------------------------------------------------------------------------------------------------------------------------------------------------------------------------------------------------------------------------------------------------------------------------------------------------------------------------------------------------------------------------------------------------------------------------------------------------------------------------------------------------------------------------------------------------------------------------------------------------------------------------------------------------------------------------------------------------------------------------------------------------------------------------------------------------------------------------------------------------------------------------------------------------------------------------------------------------------------------------------------------------------------------------------------------------------------------------------------------------------------------------------------------------------------------------------------------------------------------------------------------------------------------------|
| 1 | TI "quality of life" OR "HRQOL" OR AB "quality of life" OR "HRQOL"                                                                                                                                                                                                                                                                                                                                                                                                                                                                                                                                                                                                                                                                                                                                                                                                                                                                                                                                                                                                                                                                                                                                                                                                                                                                                                                                                                                                                                                                                                                                                                                                                                                                                                                                                                                                                                                                                                                                                                                                                                                                                                                                                                                                                                                                                                                                                                                                                                                                                                                                                                                                                                                                                                                                                                                                                                                                                                                                                                                                                                                                                                                                                                                                                                                                                                                                                                                                                                                                                                                                                                                                                                                                                                                                                                                                                                                                                                                                                                                                                                                                                                                                                                                                                                                                                                                                                                                                                                                                                                                                                                                                                                                                                                                                                                                                                                                                                                                                                                                                                                                                                                                                                                                                                                                                                                                                                                                                                                                                                                                                                                                                                                                                         |
| 2 | TI (instrument OR instruments OR questionnaire OR questionnaires OR scale OR scale OR tool OR tools) OR AB (instrument OR instruments OR questionnaire OR questionnaires OR scale OR scale OR tool OR tools)                                                                                                                                                                                                                                                                                                                                                                                                                                                                                                                                                                                                                                                                                                                                                                                                                                                                                                                                                                                                                                                                                                                                                                                                                                                                                                                                                                                                                                                                                                                                                                                                                                                                                                                                                                                                                                                                                                                                                                                                                                                                                                                                                                                                                                                                                                                                                                                                                                                                                                                                                                                                                                                                                                                                                                                                                                                                                                                                                                                                                                                                                                                                                                                                                                                                                                                                                                                                                                                                                                                                                                                                                                                                                                                                                                                                                                                                                                                                                                                                                                                                                                                                                                                                                                                                                                                                                                                                                                                                                                                                                                                                                                                                                                                                                                                                                                                                                                                                                                                                                                                                                                                                                                                                                                                                                                                                                                                                                                                                                                                               |
| 3 | TI ("Validation Studies" OR "reproducibility of results" OR reproducib* OR "psychometrics" OR psychometr* OR clinimetr* OR clinometr* OR "observer variation" OR observer variation OR "discriminant analysis" OR reliab* OR valid* OR coefficient OR "internal consistency" OR (cronbach* AND (alpha OR alphas)) OR "item correlation" OR "item correlations" OR "item selection" OR "item selections" OR "item reduction" OR "item reductions" OR agreement OR precision OR imprecision OR "precise values" OR test-retest OR (test AND retest) OR (reliab* AND (test OR retest)) OR stability OR interrater OR inter-rater OR intrarater OR intra-rater OR intertester OR inter-tester OR intratester OR intra-tester OR interobserver OR inter-observer OR intraobserver OR intra-observer OR intertechnician OR inter-technician OR intratechnician OR intra-technician OR interexaminer OR inter-examiner OR intraexaminer OR intra-examiner OR interassay OR inter-assay OR intraassay OR intra-assay OR interindividual OR inter-individual OR intraindividual OR intra-individual OR interparticipant OR inter-participant OR intraparticipant OR intra-participant OR kappa OR "kappa's" OR kappas OR "coefficient of variation" OR repeatab* OR ((replicab* OR repeated) AND (measure OR measures OR findings OR result OR results OR test OR tests)) OR generaliza* OR generalisa* OR concordance OR (intraclass AND correlation*) OR discriminative OR "known group" OR "factor analysis" OR "factor analyses" OR "factor structure" OR "factor structure" OR dimensionality OR subscale* OR "multitrait scaling analysis" OR "multitrait scaling analyses" OR "item discriminant" OR "interscale correlation" OR "interscale correlations" OR ((error OR errors) AND (measure* OR correlat* OR evaluat* OR accuracy OR accurate OR precision OR mean)) OR "individual variability" OR "interval variability" OR "rate variability" OR "variability analysis" OR (uncertainty AND (measurement OR measuring)) OR "standard error of measurement" OR sensitiv* OR responsive* OR (limit AND detection) OR "minimal detectable concentration" OR interpretab* OR (small* AND (real OR detectable) AND (change OR difference)) OR "meaningful change" OR "minimal important change" OR "minimal important difference" OR "minimally important change" OR "minimally important difference" OR "minimal detectable change" OR "minimal detectable difference" OR "minimally detectable change" OR "minimally detectable difference" OR "minimal real change" OR "minimal real difference" OR "minimally real change" OR "minimally real difference" OR "ceiling effect" OR "floor effect" OR "Item response model" OR IRT OR Rasch OR "Differential item functioning" OR DIF OR "computer adaptive testing" OR "item bank" OR "cross-cultural equivalence") OR AB ("Validation Studies" OR "reproducibility of results" OR reproducib* OR "psychometrics" OR psychometr* OR clinimetr* OR clinometr* OR "observer variation" OR observer variation OR "discriminant analysis" OR reliab* OR valid* OR coefficient OR "internal consistency" OR (cronbach* AND (alpha OR alphas)) OR "item correlation" OR "item correlations" OR "item selection" OR "item selections" OR "item reduction" OR "item reductions" OR agreement OR precision OR imprecision OR "precise values" OR test-retest OR (test AND retest) OR (reliab* AND (test OR retest)) OR stability OR interrater OR inter-rater OR intrarater OR intra-rater OR intertester OR inter-tester OR intratester OR intra-tester OR interobserver OR inter-observer OR intraobserver OR intra-observer OR intertechnician OR inter-technician OR intratechnician OR intra-technician OR interexaminer OR inter-examiner OR intraexaminer OR intra-examiner OR interassay OR inter-assay OR intraassay OR intra-assay OR interindividual OR inter-individual OR intraindividual OR intra-individual OR interparticipant OR inter-participant OR intraparticipant OR intra-participant OR kappa OR "kappa's" OR kappas OR "coefficient of variation" OR repeatab* OR ((replicab* OR repeated) AND (measure OR measures OR findings OR result OR results OR test OR tests)) OR generaliza* OR generalisa* OR concordance OR (intraclass AND correlation*) OR discriminative OR "known group" OR "factor analysis" OR "factor analyses" OR "factor structure" OR "factor structure" OR dimensionality OR subscale* OR "multitrait scaling analysis" OR "multitrait scaling analyses" OR "item discriminant" OR "interscale correlation" OR "interscale correlations" OR ((error OR errors) AND (measure* OR correlat* OR evaluat* OR accuracy OR accurate OR precision OR mean)) OR "individual variability" OR "interval variability" OR "rate variability" OR "variability analysis" OR (uncertainty AND (measurement OR measuring)) OR "standard error of measurement" OR sensitiv* OR responsive* OR (limit AND detection) OR "minimal detectable concentration" OR interpretab* OR (small* AND (real OR detectable) AND (change OR difference)) OR "meaningful change" OR "minimal important change" OR "minimal important difference" OR "minimally important change" OR "minimally important difference" OR "minimal detectable change" OR "minimal detectable difference" OR "minimally detectable change" OR "minimally detectable difference" OR "minimal real change" OR "minimal real difference" OR "minimally real change" OR "minimally real difference" OR "ceiling effect" OR "floor effect" OR "Item response model" OR IRT OR Rasch OR "Differential item functioning" OR DIF OR "computer adaptive testing" OR "item bank" OR "cross-cultural equivalence") |
| 4 | TI review OR AB review                                                                                                                                                                                                                                                                                                                                                                                                                                                                                                                                                                                                                                                                                                                                                                                                                                                                                                                                                                                                                                                                                                                                                                                                                                                                                                                                                                                                                                                                                                                                                                                                                                                                                                                                                                                                                                                                                                                                                                                                                                                                                                                                                                                                                                                                                                                                                                                                                                                                                                                                                                                                                                                                                                                                                                                                                                                                                                                                                                                                                                                                                                                                                                                                                                                                                                                                                                                                                                                                                                                                                                                                                                                                                                                                                                                                                                                                                                                                                                                                                                                                                                                                                                                                                                                                                                                                                                                                                                                                                                                                                                                                                                                                                                                                                                                                                                                                                                                                                                                                                                                                                                                                                                                                                                                                                                                                                                                                                                                                                                                                                                                                                                                                                                                     |
| 5 | #1 AND #2 AND #3 AND #4                                                                                                                                                                                                                                                                                                                                                                                                                                                                                                                                                                                                                                                                                                                                                                                                                                                                                                                                                                                                                                                                                                                                                                                                                                                                                                                                                                                                                                                                                                                                                                                                                                                                                                                                                                                                                                                                                                                                                                                                                                                                                                                                                                                                                                                                                                                                                                                                                                                                                                                                                                                                                                                                                                                                                                                                                                                                                                                                                                                                                                                                                                                                                                                                                                                                                                                                                                                                                                                                                                                                                                                                                                                                                                                                                                                                                                                                                                                                                                                                                                                                                                                                                                                                                                                                                                                                                                                                                                                                                                                                                                                                                                                                                                                                                                                                                                                                                                                                                                                                                                                                                                                                                                                                                                                                                                                                                                                                                                                                                                                                                                                                                                                                                                                    |
| 6 | TI ("protocol" OR "addresses" OR "biography" OR "case reports" OR "comment" OR "directory" OR "editorial" OR "festschrift" OR "interview" OR "lectures" OR "legal cases" OR "legislation" OR "letter" OR "news" OR "newspaper article" OR "patient education handout" OR "popular works" OR "congresses" OR "consensus development conference" OR "consensus development conference" OR "practice guideline")                                                                                                                                                                                                                                                                                                                                                                                                                                                                                                                                                                                                                                                                                                                                                                                                                                                                                                                                                                                                                                                                                                                                                                                                                                                                                                                                                                                                                                                                                                                                                                                                                                                                                                                                                                                                                                                                                                                                                                                                                                                                                                                                                                                                                                                                                                                                                                                                                                                                                                                                                                                                                                                                                                                                                                                                                                                                                                                                                                                                                                                                                                                                                                                                                                                                                                                                                                                                                                                                                                                                                                                                                                                                                                                                                                                                                                                                                                                                                                                                                                                                                                                                                                                                                                                                                                                                                                                                                                                                                                                                                                                                                                                                                                                                                                                                                                                                                                                                                                                                                                                                                                                                                                                                                                                                                                                              |
| 7 | #5 NOT #6                                                                                                                                                                                                                                                                                                                                                                                                                                                                                                                                                                                                                                                                                                                                                                                                                                                                                                                                                                                                                                                                                                                                                                                                                                                                                                                                                                                                                                                                                                                                                                                                                                                                                                                                                                                                                                                                                                                                                                                                                                                                                                                                                                                                                                                                                                                                                                                                                                                                                                                                                                                                                                                                                                                                                                                                                                                                                                                                                                                                                                                                                                                                                                                                                                                                                                                                                                                                                                                                                                                                                                                                                                                                                                                                                                                                                                                                                                                                                                                                                                                                                                                                                                                                                                                                                                                                                                                                                                                                                                                                                                                                                                                                                                                                                                                                                                                                                                                                                                                                                                                                                                                                                                                                                                                                                                                                                                                                                                                                                                                                                                                                                                                                                                                                  |
| 7 | FILTER: Language (English)                                                                                                                                                                                                                                                                                                                                                                                                                                                                                                                                                                                                                                                                                                                                                                                                                                                                                                                                                                                                                                                                                                                                                                                                                                                                                                                                                                                                                                                                                                                                                                                                                                                                                                                                                                                                                                                                                                                                                                                                                                                                                                                                                                                                                                                                                                                                                                                                                                                                                                                                                                                                                                                                                                                                                                                                                                                                                                                                                                                                                                                                                                                                                                                                                                                                                                                                                                                                                                                                                                                                                                                                                                                                                                                                                                                                                                                                                                                                                                                                                                                                                                                                                                                                                                                                                                                                                                                                                                                                                                                                                                                                                                                                                                                                                                                                                                                                                                                                                                                                                                                                                                                                                                                                                                                                                                                                                                                                                                                                                                                                                                                                                                                                                                                 |
| 8 | FILTER: Period (2008-2018)                                                                                                                                                                                                                                                                                                                                                                                                                                                                                                                                                                                                                                                                                                                                                                                                                                                                                                                                                                                                                                                                                                                                                                                                                                                                                                                                                                                                                                                                                                                                                                                                                                                                                                                                                                                                                                                                                                                                                                                                                                                                                                                                                                                                                                                                                                                                                                                                                                                                                                                                                                                                                                                                                                                                                                                                                                                                                                                                                                                                                                                                                                                                                                                                                                                                                                                                                                                                                                                                                                                                                                                                                                                                                                                                                                                                                                                                                                                                                                                                                                                                                                                                                                                                                                                                                                                                                                                                                                                                                                                                                                                                                                                                                                                                                                                                                                                                                                                                                                                                                                                                                                                                                                                                                                                                                                                                                                                                                                                                                                                                                                                                                                                                                                                 |

### Search strings for PsycInfo

|   |                                                                                                                                                                                                                                            |
|---|--------------------------------------------------------------------------------------------------------------------------------------------------------------------------------------------------------------------------------------------|
| 1 | it=Quality of life                                                                                                                                                                                                                         |
| 2 | it=Questionnaires OR it="Rating Scales" OR it=Screening OR it="Screening Tests" OR it="Psychological Assessment" OR it=Inventories OR it="Individual Testing" OR it="Human Factors Measures" OR it="Checklist Testing" OR it=Psychometrics |
| 3 | #1 AND #2                                                                                                                                                                                                                                  |
| 4 | FILTER: Methodology (Literature Review)                                                                                                                                                                                                    |
| 5 | FILTER: Language (English)                                                                                                                                                                                                                 |
| 6 | FILTER: Period (2008-2018)                                                                                                                                                                                                                 |

### Search strings for Scopus

|   |                                                                                                                                                                                                                                                                                                                                                                                                                                                                                                                                                                                                                                                                                                                                                                                                                                                                                                                                                                                                                                                                                                                                                                                                                                                                                                                                                                                                                                                                                                                                                                                                                                                                                                                                                                                                                                                                                                                                                                                                                                                                                                                                                                                                                                                                                                                                                                                                                                                                                                                                                                                                                                                                                                                                                                                                                                                                               |
|---|-------------------------------------------------------------------------------------------------------------------------------------------------------------------------------------------------------------------------------------------------------------------------------------------------------------------------------------------------------------------------------------------------------------------------------------------------------------------------------------------------------------------------------------------------------------------------------------------------------------------------------------------------------------------------------------------------------------------------------------------------------------------------------------------------------------------------------------------------------------------------------------------------------------------------------------------------------------------------------------------------------------------------------------------------------------------------------------------------------------------------------------------------------------------------------------------------------------------------------------------------------------------------------------------------------------------------------------------------------------------------------------------------------------------------------------------------------------------------------------------------------------------------------------------------------------------------------------------------------------------------------------------------------------------------------------------------------------------------------------------------------------------------------------------------------------------------------------------------------------------------------------------------------------------------------------------------------------------------------------------------------------------------------------------------------------------------------------------------------------------------------------------------------------------------------------------------------------------------------------------------------------------------------------------------------------------------------------------------------------------------------------------------------------------------------------------------------------------------------------------------------------------------------------------------------------------------------------------------------------------------------------------------------------------------------------------------------------------------------------------------------------------------------------------------------------------------------------------------------------------------------|
| 1 | TITLE-ABS-KEY("Quality of life" OR "HRQOL")                                                                                                                                                                                                                                                                                                                                                                                                                                                                                                                                                                                                                                                                                                                                                                                                                                                                                                                                                                                                                                                                                                                                                                                                                                                                                                                                                                                                                                                                                                                                                                                                                                                                                                                                                                                                                                                                                                                                                                                                                                                                                                                                                                                                                                                                                                                                                                                                                                                                                                                                                                                                                                                                                                                                                                                                                                   |
| 2 | TITLE-ABS-KEY(instrument OR instruments OR questionnaire OR questionnaires OR scale OR scale OR tool OR tools)                                                                                                                                                                                                                                                                                                                                                                                                                                                                                                                                                                                                                                                                                                                                                                                                                                                                                                                                                                                                                                                                                                                                                                                                                                                                                                                                                                                                                                                                                                                                                                                                                                                                                                                                                                                                                                                                                                                                                                                                                                                                                                                                                                                                                                                                                                                                                                                                                                                                                                                                                                                                                                                                                                                                                                |
| 3 | TITLE-ABS-KEY("Validation Studies" OR "reproducibility of results" OR reproducib* OR "psychometrics" OR psychometr* OR clinimetr* OR clinometr* OR "observer variation" OR observer variation OR "discriminant analysis" OR reliab* OR valid* OR coefficient OR "internal consistency" OR (cronbach* AND (alpha OR alphas)) OR "item correlation" OR "item correlations" OR "item selection" OR "item selections" OR "item reduction" OR "item reductions" OR agreement OR precision OR imprecision OR "precise values" OR test-retest OR (test AND retest) OR (reliab* AND (test OR retest)) OR stability OR interrater OR inter-rater OR intrarater OR intra-rater OR intertester OR inter-tester OR intratester OR intra-tester OR interobserver OR inter-observer OR intraobserver OR intra-observer OR intertechnician OR inter-technician OR intratechnician OR intra-technician OR interexaminer OR inter-examiner OR intraexaminer OR intra-examiner OR interassay OR inter-assay OR intraassay OR intra-assay OR interindividual OR inter-individual OR intraindividual OR intra-individual OR interparticipant OR inter-participant OR intraparticipant OR intra-participant OR kappa OR "kappa's" OR kappas OR "coefficient of variation" OR repeatab* OR ((replicab* OR repeated) AND (measure OR measures OR findings OR result OR results OR test OR tests)) OR generaliza* OR generalisa* OR concordance OR (intraclass AND correlation*) OR discriminative OR "known group" OR "factor analysis" OR "factor analyses" OR "factor structure" OR "factor structure" OR dimensionality OR subscale* OR "multitrait scaling analysis" OR "multitrait scaling analyses" OR "item discriminant" OR "interscale correlation" OR "interscale correlations" OR ((error OR errors) AND (measure* OR correlat* OR evaluat* OR accuracy OR accurate OR precision OR mean)) OR "individual variability" OR "interval variability" OR "rate variability" OR "variability analysis" OR (uncertainty AND (measurement OR measuring)) OR "standard error of measurement" OR sensitiv* OR responsive* OR (limit AND detection) OR "minimal detectable concentration" OR interpretab* OR (small* AND (real OR detectable) AND (change OR difference)) OR "meaningful change" OR "minimal important change" OR "minimal important difference" OR "minimally important change" OR "minimally important difference" OR "minimal detectable change" OR "minimal detectable difference" OR "minimally detectable change" OR "minimally detectable difference" OR "minimal real change" OR "minimal real difference" OR "minimally real change" OR "minimally real difference" OR "ceiling effect" OR "floor effect" OR "Item response model" OR IRT OR Rasch OR "Differential item functioning" OR DIF OR "computer adaptive testing" OR "item bank" OR "cross-cultural equivalence") |
| 4 | #1 AND #2 AND #3                                                                                                                                                                                                                                                                                                                                                                                                                                                                                                                                                                                                                                                                                                                                                                                                                                                                                                                                                                                                                                                                                                                                                                                                                                                                                                                                                                                                                                                                                                                                                                                                                                                                                                                                                                                                                                                                                                                                                                                                                                                                                                                                                                                                                                                                                                                                                                                                                                                                                                                                                                                                                                                                                                                                                                                                                                                              |
| 5 | TITLE("protocol" OR "addresses" OR "biography" OR "case reports" OR "comment" OR "directory" OR "editorial" OR "festschrift" OR "interview" OR "lectures" OR "legal cases" OR "legislation" OR "letter" OR "news" OR "newspaper article" OR "patient education handout" OR "popular works" OR "congresses" OR "consensus development conference" OR "consensus development conference" OR "practice guideline")                                                                                                                                                                                                                                                                                                                                                                                                                                                                                                                                                                                                                                                                                                                                                                                                                                                                                                                                                                                                                                                                                                                                                                                                                                                                                                                                                                                                                                                                                                                                                                                                                                                                                                                                                                                                                                                                                                                                                                                                                                                                                                                                                                                                                                                                                                                                                                                                                                                               |
| 6 | #4 NOT #5                                                                                                                                                                                                                                                                                                                                                                                                                                                                                                                                                                                                                                                                                                                                                                                                                                                                                                                                                                                                                                                                                                                                                                                                                                                                                                                                                                                                                                                                                                                                                                                                                                                                                                                                                                                                                                                                                                                                                                                                                                                                                                                                                                                                                                                                                                                                                                                                                                                                                                                                                                                                                                                                                                                                                                                                                                                                     |
| 7 | FILTER: Document Type (Review)                                                                                                                                                                                                                                                                                                                                                                                                                                                                                                                                                                                                                                                                                                                                                                                                                                                                                                                                                                                                                                                                                                                                                                                                                                                                                                                                                                                                                                                                                                                                                                                                                                                                                                                                                                                                                                                                                                                                                                                                                                                                                                                                                                                                                                                                                                                                                                                                                                                                                                                                                                                                                                                                                                                                                                                                                                                |
| 8 | FILTER: Language (English)                                                                                                                                                                                                                                                                                                                                                                                                                                                                                                                                                                                                                                                                                                                                                                                                                                                                                                                                                                                                                                                                                                                                                                                                                                                                                                                                                                                                                                                                                                                                                                                                                                                                                                                                                                                                                                                                                                                                                                                                                                                                                                                                                                                                                                                                                                                                                                                                                                                                                                                                                                                                                                                                                                                                                                                                                                                    |
| 9 | FILTER: Period (2008-2018)                                                                                                                                                                                                                                                                                                                                                                                                                                                                                                                                                                                                                                                                                                                                                                                                                                                                                                                                                                                                                                                                                                                                                                                                                                                                                                                                                                                                                                                                                                                                                                                                                                                                                                                                                                                                                                                                                                                                                                                                                                                                                                                                                                                                                                                                                                                                                                                                                                                                                                                                                                                                                                                                                                                                                                                                                                                    |

## Search strings for Web of Science (WoS)

|   |                                                                                                                                                                                                                                                                                                                                                                                                                                                                                                                                                                                                                                                                                                                                                                                                                                                                                                                                                                                                                                                                                                                                                                                                                                                                                                                                                                                                                                                                                                                                                                                                                                                                                                                                                                                                                                                                                                                                                                                                                                                                                                                                                                                                                                                                                                                                                                                                                                                                                                                                                                                                                                                                                                                                                                                                                                                                     |
|---|---------------------------------------------------------------------------------------------------------------------------------------------------------------------------------------------------------------------------------------------------------------------------------------------------------------------------------------------------------------------------------------------------------------------------------------------------------------------------------------------------------------------------------------------------------------------------------------------------------------------------------------------------------------------------------------------------------------------------------------------------------------------------------------------------------------------------------------------------------------------------------------------------------------------------------------------------------------------------------------------------------------------------------------------------------------------------------------------------------------------------------------------------------------------------------------------------------------------------------------------------------------------------------------------------------------------------------------------------------------------------------------------------------------------------------------------------------------------------------------------------------------------------------------------------------------------------------------------------------------------------------------------------------------------------------------------------------------------------------------------------------------------------------------------------------------------------------------------------------------------------------------------------------------------------------------------------------------------------------------------------------------------------------------------------------------------------------------------------------------------------------------------------------------------------------------------------------------------------------------------------------------------------------------------------------------------------------------------------------------------------------------------------------------------------------------------------------------------------------------------------------------------------------------------------------------------------------------------------------------------------------------------------------------------------------------------------------------------------------------------------------------------------------------------------------------------------------------------------------------------|
| 1 | TI=("Quality of Life" OR "HRQOL")                                                                                                                                                                                                                                                                                                                                                                                                                                                                                                                                                                                                                                                                                                                                                                                                                                                                                                                                                                                                                                                                                                                                                                                                                                                                                                                                                                                                                                                                                                                                                                                                                                                                                                                                                                                                                                                                                                                                                                                                                                                                                                                                                                                                                                                                                                                                                                                                                                                                                                                                                                                                                                                                                                                                                                                                                                   |
| 2 | TS=(instrument OR instruments OR questionnaire OR questionnaires OR scale OR scales OR tool OR tools)                                                                                                                                                                                                                                                                                                                                                                                                                                                                                                                                                                                                                                                                                                                                                                                                                                                                                                                                                                                                                                                                                                                                                                                                                                                                                                                                                                                                                                                                                                                                                                                                                                                                                                                                                                                                                                                                                                                                                                                                                                                                                                                                                                                                                                                                                                                                                                                                                                                                                                                                                                                                                                                                                                                                                               |
| 3 | TS=("Validation Studies" OR "reproducibility of results" OR reproducib* OR "psychometrics" OR psychometr* OR clinimetr* OR clinometr* OR "observer variation" OR observer variation OR "discriminant analysis" OR reliab* OR valid* OR coefficient OR "internal consistency" OR (cronbach* AND (alpha OR alphas)) OR "item correlation" OR "item correlations" OR "item selection" OR "item selections" OR "item reduction" OR "item reductions" OR agreement OR precision OR imprecision OR "precise values" OR test-retest OR (test AND retest) OR (reliab* AND (test OR retest)) OR stability OR interrater OR inter-rater OR intrarater OR intra-rater OR intertester OR inter-tester OR intratester OR intra-tester OR interobserver OR inter-observer OR intraobserver OR intra-observer OR intertechnician OR inter-technician OR intratechnician OR intra-technician OR interexaminer OR inter-examiner OR intraexaminer OR intra-examiner OR interassay OR inter-assay OR intraassay OR intra-assay OR interindividual OR inter-individual OR intraindividual OR intra-individual OR interparticipant OR inter-participant OR intraparticipant OR intra-participant OR kappa OR "kappa's" OR kappas OR "coefficient of variation" OR repeatab* OR ((replicab* OR repeated) AND (measure OR measures OR findings OR result OR results OR test OR tests)) OR generaliza* OR generalisa* OR concordance OR (intraclass AND correlation*) OR discriminative OR "known group" OR "factor analysis" OR "factor analyses" OR "factor structure" OR "factor structure" OR dimensionality OR subscale* OR "multitrait scaling analysis" OR "multitrait scaling analyses" OR "item discriminant" OR "interscale correlation" OR "interscale correlations" OR ((error OR errors) AND (measure* OR correlat* OR evaluat* OR accuracy OR accurate OR precision OR mean)) OR "individual variability" OR "interval variability" OR "rate variability" OR "variability analysis" OR (uncertainty AND (measurement OR measuring)) OR "standard error of measurement" OR sensitiv* OR responsive* OR (limit AND detection) OR "minimal detectable concentration" OR interpretab* OR (small* AND (real OR detectable) AND (change OR difference)) OR "meaningful change" OR "minimal important change" OR "minimal important difference" OR "minimally important change" OR "minimally important difference" OR "minimal detectable change" OR "minimal detectable difference" OR "minimally detectable change" OR "minimally detectable difference" OR "minimal real change" OR "minimal real difference" OR "minimally real change" OR "minimally real difference" OR "ceiling effect" OR "floor effect" OR "Item response model" OR IRT OR Rasch OR "Differential item functioning" OR DIF OR "computer adaptive testing" OR "item bank" OR "cross-cultural equivalence") |
| 4 | #1 AND #2 AND #3                                                                                                                                                                                                                                                                                                                                                                                                                                                                                                                                                                                                                                                                                                                                                                                                                                                                                                                                                                                                                                                                                                                                                                                                                                                                                                                                                                                                                                                                                                                                                                                                                                                                                                                                                                                                                                                                                                                                                                                                                                                                                                                                                                                                                                                                                                                                                                                                                                                                                                                                                                                                                                                                                                                                                                                                                                                    |
| 5 | TI=("protocol" OR "addresses" OR "biography" OR "case reports" OR "comment" OR "directory" OR "editorial" OR "festschrift" OR "interview" OR "lectures" OR "legal cases" OR "legislation" OR "letter" OR "news" OR "newspaper article" OR "patient education handout" OR "popular works" OR "congresses" OR "consensus development conference" OR "consensus development conference" OR "practice guideline")                                                                                                                                                                                                                                                                                                                                                                                                                                                                                                                                                                                                                                                                                                                                                                                                                                                                                                                                                                                                                                                                                                                                                                                                                                                                                                                                                                                                                                                                                                                                                                                                                                                                                                                                                                                                                                                                                                                                                                                                                                                                                                                                                                                                                                                                                                                                                                                                                                                       |
| 6 | #4 NOT #5                                                                                                                                                                                                                                                                                                                                                                                                                                                                                                                                                                                                                                                                                                                                                                                                                                                                                                                                                                                                                                                                                                                                                                                                                                                                                                                                                                                                                                                                                                                                                                                                                                                                                                                                                                                                                                                                                                                                                                                                                                                                                                                                                                                                                                                                                                                                                                                                                                                                                                                                                                                                                                                                                                                                                                                                                                                           |
| 7 | FILTER: Document Type (Literature Review)                                                                                                                                                                                                                                                                                                                                                                                                                                                                                                                                                                                                                                                                                                                                                                                                                                                                                                                                                                                                                                                                                                                                                                                                                                                                                                                                                                                                                                                                                                                                                                                                                                                                                                                                                                                                                                                                                                                                                                                                                                                                                                                                                                                                                                                                                                                                                                                                                                                                                                                                                                                                                                                                                                                                                                                                                           |
| 8 | FILTER: Language (English)                                                                                                                                                                                                                                                                                                                                                                                                                                                                                                                                                                                                                                                                                                                                                                                                                                                                                                                                                                                                                                                                                                                                                                                                                                                                                                                                                                                                                                                                                                                                                                                                                                                                                                                                                                                                                                                                                                                                                                                                                                                                                                                                                                                                                                                                                                                                                                                                                                                                                                                                                                                                                                                                                                                                                                                                                                          |
| 9 | FILTER: Period (2008-2018)                                                                                                                                                                                                                                                                                                                                                                                                                                                                                                                                                                                                                                                                                                                                                                                                                                                                                                                                                                                                                                                                                                                                                                                                                                                                                                                                                                                                                                                                                                                                                                                                                                                                                                                                                                                                                                                                                                                                                                                                                                                                                                                                                                                                                                                                                                                                                                                                                                                                                                                                                                                                                                                                                                                                                                                                                                          |

## Search strings for ProQuest Dissertations &amp; Theses Global

|   |                                                                                                                                                                                                                                                                                                                                                                                                                                                                                                                                                                                                                                                                                                                                                                                                                                                                                                                                                                                                                                                                                                                                                                                                                                                                                                                                                                                                                                                                                                                                                                                                                                                                                                                                                                                                                                                                                                                                                                                                                                                                                                                                                                                                                                                                                                                                                                                                                                                                                                                                                                                                                                                                                                                                                                                                                                                                                                                                                                                                                                                                                                                                                                                                                                                                                                                                                                                                                                                                                                                                                                                                                                                                                                                                                                                                                                                                                                                                                                                                                                                                                                                                                                                                                                                                                                                                                                                                                                                                                                                                                                                                                                                                                                                                                                                                                                                                                                                                                                                                                                                                                                                                                                                                                                                                                                                                                                                                                                                                                                                                                                                                                                                                                                                                          |
|---|------------------------------------------------------------------------------------------------------------------------------------------------------------------------------------------------------------------------------------------------------------------------------------------------------------------------------------------------------------------------------------------------------------------------------------------------------------------------------------------------------------------------------------------------------------------------------------------------------------------------------------------------------------------------------------------------------------------------------------------------------------------------------------------------------------------------------------------------------------------------------------------------------------------------------------------------------------------------------------------------------------------------------------------------------------------------------------------------------------------------------------------------------------------------------------------------------------------------------------------------------------------------------------------------------------------------------------------------------------------------------------------------------------------------------------------------------------------------------------------------------------------------------------------------------------------------------------------------------------------------------------------------------------------------------------------------------------------------------------------------------------------------------------------------------------------------------------------------------------------------------------------------------------------------------------------------------------------------------------------------------------------------------------------------------------------------------------------------------------------------------------------------------------------------------------------------------------------------------------------------------------------------------------------------------------------------------------------------------------------------------------------------------------------------------------------------------------------------------------------------------------------------------------------------------------------------------------------------------------------------------------------------------------------------------------------------------------------------------------------------------------------------------------------------------------------------------------------------------------------------------------------------------------------------------------------------------------------------------------------------------------------------------------------------------------------------------------------------------------------------------------------------------------------------------------------------------------------------------------------------------------------------------------------------------------------------------------------------------------------------------------------------------------------------------------------------------------------------------------------------------------------------------------------------------------------------------------------------------------------------------------------------------------------------------------------------------------------------------------------------------------------------------------------------------------------------------------------------------------------------------------------------------------------------------------------------------------------------------------------------------------------------------------------------------------------------------------------------------------------------------------------------------------------------------------------------------------------------------------------------------------------------------------------------------------------------------------------------------------------------------------------------------------------------------------------------------------------------------------------------------------------------------------------------------------------------------------------------------------------------------------------------------------------------------------------------------------------------------------------------------------------------------------------------------------------------------------------------------------------------------------------------------------------------------------------------------------------------------------------------------------------------------------------------------------------------------------------------------------------------------------------------------------------------------------------------------------------------------------------------------------------------------------------------------------------------------------------------------------------------------------------------------------------------------------------------------------------------------------------------------------------------------------------------------------------------------------------------------------------------------------------------------------------------------------------------------------------------------------------|
| 1 | ti("Quality of life" OR HRQOL) OR ab("Quality of life" OR HRQOL)                                                                                                                                                                                                                                                                                                                                                                                                                                                                                                                                                                                                                                                                                                                                                                                                                                                                                                                                                                                                                                                                                                                                                                                                                                                                                                                                                                                                                                                                                                                                                                                                                                                                                                                                                                                                                                                                                                                                                                                                                                                                                                                                                                                                                                                                                                                                                                                                                                                                                                                                                                                                                                                                                                                                                                                                                                                                                                                                                                                                                                                                                                                                                                                                                                                                                                                                                                                                                                                                                                                                                                                                                                                                                                                                                                                                                                                                                                                                                                                                                                                                                                                                                                                                                                                                                                                                                                                                                                                                                                                                                                                                                                                                                                                                                                                                                                                                                                                                                                                                                                                                                                                                                                                                                                                                                                                                                                                                                                                                                                                                                                                                                                                                         |
| 2 | ti(instrument OR instruments OR questionnaire OR questionnaires OR scale OR scales OR tool OR tools) OR ab(instrument OR instruments OR questionnaire OR questionnaires OR scale OR scales OR tool OR tools)                                                                                                                                                                                                                                                                                                                                                                                                                                                                                                                                                                                                                                                                                                                                                                                                                                                                                                                                                                                                                                                                                                                                                                                                                                                                                                                                                                                                                                                                                                                                                                                                                                                                                                                                                                                                                                                                                                                                                                                                                                                                                                                                                                                                                                                                                                                                                                                                                                                                                                                                                                                                                                                                                                                                                                                                                                                                                                                                                                                                                                                                                                                                                                                                                                                                                                                                                                                                                                                                                                                                                                                                                                                                                                                                                                                                                                                                                                                                                                                                                                                                                                                                                                                                                                                                                                                                                                                                                                                                                                                                                                                                                                                                                                                                                                                                                                                                                                                                                                                                                                                                                                                                                                                                                                                                                                                                                                                                                                                                                                                             |
| 3 | ti("Validation Studies" OR "reproducibility of results" OR reproducib* OR "psychometrics" OR psychometr* OR clinimetr* OR clinometr* OR "observer variation" OR observer variation OR "discriminant analysis" OR reliab* OR valid* OR coefficient OR "internal consistency" OR (cronbach* AND (alpha OR alphas)) OR "item correlation" OR "item correlations" OR "item selection" OR "item selections" OR "item reduction" OR "item reductions" OR agreement OR precision OR imprecision OR "precise values" OR test-retest OR (test AND retest) OR (reliab* AND (test OR retest)) OR stability OR interrater OR inter-rater OR intrarater OR intra-rater OR intertester OR inter-tester OR intratester OR intra-tester OR interobserver OR inter-observer OR intraobserver OR intra-observer OR intertechnician OR inter-technician OR intratechnician OR intra-technician OR interexaminer OR inter-examiner OR intraexaminer OR intra-examiner OR interassay OR inter-assay OR intraassay OR intra-assay OR interindividual OR inter-individual OR intraindividual OR intra-individual OR interparticipant OR inter-participant OR intraparticipant OR intra-participant OR kappa OR "kappa's" OR kappas OR "coefficient of variation" OR repeatab* OR ((replicab* OR repeated) AND (measure OR measures OR findings OR result OR results OR test OR tests)) OR generaliza* OR generalisa* OR concordance OR (intraclass AND correlation*) OR discriminative OR "known group" OR "factor analysis" OR "factor analyses" OR "factor structure" OR "factor structure" OR dimensionality OR subscale* OR "multitrait scaling analysis" OR "multitrait scaling analyses" OR "item discriminant" OR "interscale correlation" OR "interscale correlations" OR ((error OR errors) AND (measure* OR correlat* OR evaluat* OR accuracy OR accurate OR precision OR mean)) OR "individual variability" OR "interval variability" OR "rate variability" OR "variability analysis" OR (uncertainty AND (measurement OR measuring)) OR "standard error of measurement" OR sensitiv* OR responsive* OR (limit AND detection) OR "minimal detectable concentration" OR interpretab* OR (small* AND (real OR detectable) AND (change OR difference)) OR "meaningful change" OR "minimal important change" OR "minimal important difference" OR "minimally important change" OR "minimally important difference" OR "minimal detectable change" OR "minimal detectable difference" OR "minimally detectable change" OR "minimally detectable difference" OR "minimal real change" OR "minimal real difference" OR "minimally real change" OR "minimally real difference" OR "ceiling effect" OR "floor effect" OR "Item response model" OR IRT OR Rasch OR "Differential item functioning" OR DIF OR "computer adaptive testing" OR "item bank" OR "cross-cultural equivalence") OR ab("Validation Studies" OR "reproducibility of results" OR reproducib* OR "psychometrics" OR psychometr* OR clinimetr* OR clinometr* OR "observer variation" OR observer variation OR "discriminant analysis" OR reliab* OR valid* OR coefficient OR "internal consistency" OR (cronbach* AND (alpha OR alphas)) OR "item correlation" OR "item correlations" OR "item selection" OR "item selections" OR "item reduction" OR "item reductions" OR agreement OR precision OR imprecision OR "precise values" OR test-retest OR (test AND retest) OR (reliab* AND (test OR retest)) OR stability OR interrater OR inter-rater OR intrarater OR intra-rater OR intertester OR inter-tester OR intratester OR intra-tester OR interobserver OR inter-observer OR intraobserver OR intra-observer OR intertechnician OR inter-technician OR intratechnician OR intra-technician OR interexaminer OR inter-examiner OR intraexaminer OR intra-examiner OR interassay OR inter-assay OR intraassay OR intra-assay OR interindividual OR inter-individual OR intraindividual OR intra-individual OR interparticipant OR inter-participant OR intraparticipant OR intra-participant OR kappa OR "kappa's" OR kappas OR "coefficient of variation" OR repeatab* OR ((replicab* OR repeated) AND (measure OR measures OR findings OR result OR results OR test OR tests)) OR generaliza* OR generalisa* OR concordance OR (intraclass AND correlation*) OR discriminative OR "known group" OR "factor analysis" OR "factor analyses" OR "factor structure" OR "factor structure" OR dimensionality OR subscale* OR "multitrait scaling analysis" OR "multitrait scaling analyses" OR "item discriminant" OR "interscale correlation" OR "interscale correlations" OR ((error OR errors) AND (measure* OR correlat* OR evaluat* OR accuracy OR accurate OR precision OR mean)) OR "individual variability" OR "interval variability" OR "rate variability" OR "variability analysis" OR (uncertainty AND (measurement OR measuring)) OR "standard error of measurement" OR sensitiv* OR responsive* OR (limit AND detection) OR "minimal detectable concentration" OR interpretab* OR (small* AND (real OR detectable) AND (change OR difference)) OR "meaningful change" OR "minimal important change" OR "minimal important difference" OR "minimally important change" OR "minimally important difference" OR "minimal detectable change" OR "minimal detectable difference" OR "minimally detectable change" OR "minimally detectable difference" OR "minimal real change" OR "minimal real difference" OR "minimally real change" OR "minimally real difference" OR "ceiling effect" OR "floor effect" OR "Item response model" OR IRT OR Rasch OR "Differential item functioning" OR DIF OR "computer adaptive testing" OR "item bank" OR "cross-cultural equivalence") |
| 4 | #1 AND #2 AND #3                                                                                                                                                                                                                                                                                                                                                                                                                                                                                                                                                                                                                                                                                                                                                                                                                                                                                                                                                                                                                                                                                                                                                                                                                                                                                                                                                                                                                                                                                                                                                                                                                                                                                                                                                                                                                                                                                                                                                                                                                                                                                                                                                                                                                                                                                                                                                                                                                                                                                                                                                                                                                                                                                                                                                                                                                                                                                                                                                                                                                                                                                                                                                                                                                                                                                                                                                                                                                                                                                                                                                                                                                                                                                                                                                                                                                                                                                                                                                                                                                                                                                                                                                                                                                                                                                                                                                                                                                                                                                                                                                                                                                                                                                                                                                                                                                                                                                                                                                                                                                                                                                                                                                                                                                                                                                                                                                                                                                                                                                                                                                                                                                                                                                                                         |
| 5 | ti(Systematic Review) OR ab(Systematic Review)                                                                                                                                                                                                                                                                                                                                                                                                                                                                                                                                                                                                                                                                                                                                                                                                                                                                                                                                                                                                                                                                                                                                                                                                                                                                                                                                                                                                                                                                                                                                                                                                                                                                                                                                                                                                                                                                                                                                                                                                                                                                                                                                                                                                                                                                                                                                                                                                                                                                                                                                                                                                                                                                                                                                                                                                                                                                                                                                                                                                                                                                                                                                                                                                                                                                                                                                                                                                                                                                                                                                                                                                                                                                                                                                                                                                                                                                                                                                                                                                                                                                                                                                                                                                                                                                                                                                                                                                                                                                                                                                                                                                                                                                                                                                                                                                                                                                                                                                                                                                                                                                                                                                                                                                                                                                                                                                                                                                                                                                                                                                                                                                                                                                                           |
| 5 | #4 AND #5                                                                                                                                                                                                                                                                                                                                                                                                                                                                                                                                                                                                                                                                                                                                                                                                                                                                                                                                                                                                                                                                                                                                                                                                                                                                                                                                                                                                                                                                                                                                                                                                                                                                                                                                                                                                                                                                                                                                                                                                                                                                                                                                                                                                                                                                                                                                                                                                                                                                                                                                                                                                                                                                                                                                                                                                                                                                                                                                                                                                                                                                                                                                                                                                                                                                                                                                                                                                                                                                                                                                                                                                                                                                                                                                                                                                                                                                                                                                                                                                                                                                                                                                                                                                                                                                                                                                                                                                                                                                                                                                                                                                                                                                                                                                                                                                                                                                                                                                                                                                                                                                                                                                                                                                                                                                                                                                                                                                                                                                                                                                                                                                                                                                                                                                |
| 6 | ti("protocol" OR "addresses" OR "biography" OR "case reports" OR "comment" OR "directory" OR "editorial" OR "festschrift" OR "interview" OR "lectures" OR "legal cases" OR "legislation" OR "letter" OR "news" OR "newspaper article" OR "patient education handout" OR "popular works" OR "congresses" OR "consensus development conference" OR "consensus development conference" OR "practice guideline")                                                                                                                                                                                                                                                                                                                                                                                                                                                                                                                                                                                                                                                                                                                                                                                                                                                                                                                                                                                                                                                                                                                                                                                                                                                                                                                                                                                                                                                                                                                                                                                                                                                                                                                                                                                                                                                                                                                                                                                                                                                                                                                                                                                                                                                                                                                                                                                                                                                                                                                                                                                                                                                                                                                                                                                                                                                                                                                                                                                                                                                                                                                                                                                                                                                                                                                                                                                                                                                                                                                                                                                                                                                                                                                                                                                                                                                                                                                                                                                                                                                                                                                                                                                                                                                                                                                                                                                                                                                                                                                                                                                                                                                                                                                                                                                                                                                                                                                                                                                                                                                                                                                                                                                                                                                                                                                             |
| 7 | #5 NOT #6                                                                                                                                                                                                                                                                                                                                                                                                                                                                                                                                                                                                                                                                                                                                                                                                                                                                                                                                                                                                                                                                                                                                                                                                                                                                                                                                                                                                                                                                                                                                                                                                                                                                                                                                                                                                                                                                                                                                                                                                                                                                                                                                                                                                                                                                                                                                                                                                                                                                                                                                                                                                                                                                                                                                                                                                                                                                                                                                                                                                                                                                                                                                                                                                                                                                                                                                                                                                                                                                                                                                                                                                                                                                                                                                                                                                                                                                                                                                                                                                                                                                                                                                                                                                                                                                                                                                                                                                                                                                                                                                                                                                                                                                                                                                                                                                                                                                                                                                                                                                                                                                                                                                                                                                                                                                                                                                                                                                                                                                                                                                                                                                                                                                                                                                |
| 8 | FILTER: Language (English)                                                                                                                                                                                                                                                                                                                                                                                                                                                                                                                                                                                                                                                                                                                                                                                                                                                                                                                                                                                                                                                                                                                                                                                                                                                                                                                                                                                                                                                                                                                                                                                                                                                                                                                                                                                                                                                                                                                                                                                                                                                                                                                                                                                                                                                                                                                                                                                                                                                                                                                                                                                                                                                                                                                                                                                                                                                                                                                                                                                                                                                                                                                                                                                                                                                                                                                                                                                                                                                                                                                                                                                                                                                                                                                                                                                                                                                                                                                                                                                                                                                                                                                                                                                                                                                                                                                                                                                                                                                                                                                                                                                                                                                                                                                                                                                                                                                                                                                                                                                                                                                                                                                                                                                                                                                                                                                                                                                                                                                                                                                                                                                                                                                                                                               |
| 9 | FILTER: Period (2008-2018)                                                                                                                                                                                                                                                                                                                                                                                                                                                                                                                                                                                                                                                                                                                                                                                                                                                                                                                                                                                                                                                                                                                                                                                                                                                                                                                                                                                                                                                                                                                                                                                                                                                                                                                                                                                                                                                                                                                                                                                                                                                                                                                                                                                                                                                                                                                                                                                                                                                                                                                                                                                                                                                                                                                                                                                                                                                                                                                                                                                                                                                                                                                                                                                                                                                                                                                                                                                                                                                                                                                                                                                                                                                                                                                                                                                                                                                                                                                                                                                                                                                                                                                                                                                                                                                                                                                                                                                                                                                                                                                                                                                                                                                                                                                                                                                                                                                                                                                                                                                                                                                                                                                                                                                                                                                                                                                                                                                                                                                                                                                                                                                                                                                                                                               |



## S2. Characteristics and references of studies.

| ID | Year | Author            | Title                                                                                                                                                                                                          | Type of review                                                                                            | Instruments assessed | Number Instruments        | Measurement Properties |
|----|------|-------------------|----------------------------------------------------------------------------------------------------------------------------------------------------------------------------------------------------------------|-----------------------------------------------------------------------------------------------------------|----------------------|---------------------------|------------------------|
| 1  | 2008 | Barbosa & Gaviao  | Oral health-related quality of life in children: Part III. Is there agreement between parents in rating their children's oral health-related quality of life? A systematic review                              | Studies on the quality of all available validated instruments to measure HRQoL in a particular population | Both                 | More than two instruments | One specific property  |
| 2  | 2008 | Basra et al       | The Dermatology Life Quality Index 1994–2007: a comprehensive review of validation data and clinical results                                                                                                   | Studies on the quality of one instrument to measures HRQoL in general population                          | Disease-specific     | One instrument            | Multiple properties    |
| 3  | 2008 | Carabin et al     | Quality of life measurement tools for people living with HIV/AIDS.                                                                                                                                             | Studies on the quality of all available validated instruments to measure HRQoL in a particular population | Both                 | More than two instruments | Multiple properties    |
| 4  | 2008 | Chassany et al    | Systematic review: health-related quality of life (HRQOL) questionnaires in gastro-oesophageal reflux disease.                                                                                                 | Studies on the quality of all available validated instruments to measure HRQoL in a particular population | Both                 | More than two instruments | Multiple properties    |
| 5  | 2008 | El Achhab et al   | Disease-specific health-related quality of life instruments among adults diabetic: a systematic review.                                                                                                        | Studies on the quality of a selection of instruments to measure HRQoL in a particular population          | Disease-specific     | More than two instruments | Multiple properties    |
| 6  | 2008 | Finger et al      | Quality of life in age-related macular degeneration: a review of available vision-specific psychometric tools.                                                                                                 | Studies on the quality of a selection of instruments to measure HRQoL in a particular population          | Disease-specific     | More than two instruments | Multiple properties    |
| 7  | 2008 | Franic & Bothe    | Psychometric evaluation of condition-specific instruments used to assess health-related, quality of life, attitudes, and related constructs in stuttering                                                      | Studies on the quality of a selection of instruments to measure HRQoL in a particular population          | Disease-specific     | More than two instruments | Multiple properties    |
| 8  | 2008 | Janssens et al    | Health-related quality-of-life measures for long-term follow-up in children after major trauma.                                                                                                                | Studies on the quality of all available validated instruments to measure HRQoL in a particular population | Generic              | More than two instruments | Multiple properties    |
| 9  | 2008 | Klassen et al     | Clinical research in Pediatric plastic surgery and Systematic review of quality of life questionnaires                                                                                                         | Studies on the quality of a selection of instruments to measure HRQoL in a particular population          | Disease-specific     | More than two instruments | Multiple properties    |
| 10 | 2008 | Kluivers et al    | Systematic review on recovery specific quality of life instruments                                                                                                                                             | Studies on the quality of a selection of instruments to measure HRQoL in a particular population          | Disease-specific     | More than two instruments | Multiple properties    |
| 11 | 2008 | Langham et al     | Health-related quality of life instruments in studies of adult men with testosterone deficiency syndrome: a critical assessment.                                                                               | Studies on the quality of all available validated instruments to measure HRQoL in a particular population | Both                 | More than two instruments | Multiple properties    |
| 12 | 2008 | Pearce et al      | Measuring quality of life in cancer survivors: a methodological review of existing scales                                                                                                                      | Studies on the quality of a selection of instruments to measure HRQoL in a particular population          | Disease-specific     | More than two instruments | Multiple properties    |
| 13 | 2008 | Price et al       | Measures of functional status and quality-of-life in schizophrenia                                                                                                                                             | Studies on the quality of all available validated instruments to measure HRQoL in a particular population | Both                 | More than two instruments | Multiple properties    |
| 14 | 2008 | Quittner et al    | Systematic review of health-related quality of life measures for children with respiratory conditions.                                                                                                         | Studies on the quality of a selection of instruments to measure HRQoL in a particular population          | Disease-specific     | More than two instruments | Multiple properties    |
| 15 | 2008 | Reaney et al      | Understanding and assessing the impact of alcoholism on quality of life. A systematic review of the content validity of instruments used to assess health related quality of life in alcoholism                | Studies on the quality of all available validated instruments to measure HRQoL in a particular population | Both                 | More than two instruments | One specific property  |
| 16 | 2008 | Schalarman et al  | The use of health-related quality of life (HRQOL) in children and adolescents as an outcome criterion to evaluate family oriented support for young carers in Germany: an integrative review of the literature | Studies on the quality of all available validated instruments to measure HRQoL in a particular population | Generic              | More than two instruments | Multiple properties    |
| 17 | 2008 | Solans et al      | Health-related quality of life measurement in children and adolescents: A systematic review of generic and disease-specific instruments.                                                                       | Studies on the quality of all available validated instruments to measure HRQoL in a particular population | Both                 | More than two instruments | Multiple properties    |
| 18 | 2008 | Tschiesner et al  | Content comparison of quality of life questionnaires used in head and neck cancer based on the international classification of functioning, disability and health: a systematic review.                        | Studies on the quality of a selection of instruments to measure HRQoL in a particular population          | Disease-specific     | More than two instruments | One specific property  |
| 19 | 2008 | Upton et al       | Parent-child agreement across child health-related quality of life instruments: a review of the literature.                                                                                                    | Studies on the quality of all available validated instruments to measure HRQoL in a particular population | Both                 | More than two instruments | Multiple properties    |
| 20 | 2009 | Davies N.         | Measuring health-related quality of life in cancer patients.                                                                                                                                                   | Studies on the quality of all available validated instruments to measure HRQoL in a particular population | Both                 | More than two instruments | Multiple properties    |
| 21 | 2009 | Derret et al      | Outcome after injury-a systematic literature search of studies using the EQ-5D                                                                                                                                 | Studies on the quality of one instrument to measures HRQoL in general population                          | Generic              | One instrument            | Multiple properties    |
| 22 | 2009 | Epton et al       | Quality of life in amyotrophic lateral sclerosis/motor neuron disease: a structured review.                                                                                                                    | Studies on the quality of all available validated instruments to measure HRQoL in a particular population | Both                 | More than two instruments | Multiple properties    |
| 23 | 2009 | Fitzsimmons et al | A systematic review of the use and validation of health-related quality of life instruments in older cancer patients.                                                                                          | Studies on the quality of all available validated instruments to measure HRQoL in a particular population | Both                 | More than two instruments | Multiple properties    |
| 24 | 2009 | Garin et al       | Disease-specific health-related quality of life questionnaires for heart failure: A systematic review with meta-analyses.                                                                                      | Studies on the quality of a selection of instruments to measure HRQoL in a particular population          | Disease-specific     | More than two instruments | Multiple properties    |

| ID | Year | Author              | Title                                                                                                                                                                                                                  | Type of review                                                                                            | Instruments assessed | Number Instruments        | Measurement Properties |
|----|------|---------------------|------------------------------------------------------------------------------------------------------------------------------------------------------------------------------------------------------------------------|-----------------------------------------------------------------------------------------------------------|----------------------|---------------------------|------------------------|
| 25 | 2009 | Garvie et al        | Quality of life measurement in paediatric and adolescent populations with HIV: A review of the literature                                                                                                              | Studies on the quality of all available validated instruments to measure HRQoL in a particular population | Both                 | More than two instruments | Multiple properties    |
| 26 | 2009 | Guo et al           | Measuring health-related quality of life in tuberculosis: a systematic review.                                                                                                                                         | Studies on the quality of all available validated instruments to measure HRQoL in a particular population | Both                 | More than two instruments | Multiple properties    |
| 27 | 2009 | Jay et al           | A review of quality of life instruments used in liver transplantation.                                                                                                                                                 | Studies on the quality of all available validated instruments to measure HRQoL in a particular population | Both                 | More than two instruments | Multiple properties    |
| 28 | 2009 | Speight et al       | Not all roads lead to Rome-a review of quality of life measurement in adults with diabetes.                                                                                                                            | Studies on the quality of all available validated instruments to measure HRQoL in a particular population | Both                 | More than two instruments | Multiple properties    |
| 29 | 2009 | Street et al        | Health related quality of life assessment in metastatic disease of the spine: a systematic review.                                                                                                                     | Studies on the quality of all available validated instruments to measure HRQoL in a particular population | Both                 | More than two instruments | One specific property  |
| 30 | 2009 | Waters et al        | Quality of life instruments for children and adolescents with neurodisabilities: How to choose the appropriate instrument.                                                                                             | Studies on the quality of all available validated instruments to measure HRQoL in a particular population | Both                 | More than two instruments | Multiple properties    |
| 31 | 2009 | Wettergren et al    | The use, feasibility and psychometric properties of an individualised quality-of-life instrument: A systematic review of the SEIQoL-DW.                                                                                | Studies on the quality of one instrument to measures HRQoL in general population                          | Generic              | One instrument            | Multiple properties    |
| 32 | 2010 | Albers et al        | Evaluation of quality-of-life measures for use in palliative care: a systematic review.                                                                                                                                | Studies on the quality of all available validated instruments to measure HRQoL in a particular population | Both                 | More than two instruments | Multiple properties    |
| 33 | 2010 | Branski et al       | Measuring quality of life in dysphonic patients: a systematic review of content development in patient-reported outcomes measures.                                                                                     | Studies on the quality of a selection of instruments to measure HRQoL in a particular population          | Disease-specific     | More than two instruments | Multiple properties    |
| 34 | 2010 | Bronsard et al      | What are the best outcome measures for assessing quality of life in plaque type psoriasis? A systematic review of the literature.                                                                                      | Studies on the quality of all available validated instruments to measure HRQoL in a particular population | Both                 | More than two instruments | Multiple properties    |
| 35 | 2010 | Carlon et al        | A systematic review of the psychometric properties of Quality of life measures for school children with cerebral palsy                                                                                                 | Studies on the quality of a selection of instruments to measure HRQoL in a particular population          | Disease-specific     | More than two instruments | Multiple properties    |
| 36 | 2010 | Chen et al          | Measuring Quality of Life in Oncologic Breast Surgery: A Systematic Review of Patient-Reported Outcome Measures.                                                                                                       | Studies on the quality of all available validated instruments to measure HRQoL in a particular population | Both                 | More than two instruments | Multiple properties    |
| 37 | 2010 | Forhan et al        | A systematic review of the quality of psychometric evidence supporting the use of an obesity-specific quality of life measure for use with persons who have class III obesity: Diagnostic in Obesity and Complications | Studies on the quality of one instrument to measures HRQoL in a particular population                     | Disease-specific     | One instrument            | Multiple properties    |
| 38 | 2010 | Danquah et al       | Quality of life measures for patients on hemodialysis: a review of psychometric properties.                                                                                                                            | Studies on the quality of all available validated instruments to measure HRQoL in a particular population | Both                 | More than two instruments | Multiple properties    |
| 39 | 2010 | Hill et al          | Quality of life instruments and definitions in individuals with spinal cord injury: a systematic review.                                                                                                               | Studies on the quality of all available validated instruments to measure HRQoL in a particular population | Both                 | More than two instruments | Multiple properties    |
| 40 | 2010 | Kamalski et al      | Measuring disease-specific health-related quality of life to evaluate treatment outcomes in tinnitus patients: a systematic review.                                                                                    | Studies on the quality of a selection of instruments to measure HRQoL in a particular population          | Disease-specific     | More than two instruments | Multiple properties    |
| 41 | 2010 | Klassen et al       | Quality of life questionnaires for children with cancer and childhood cancer survivors: a review of the development of available measures                                                                              | Studies on the quality of all available validated instruments to measure HRQoL in a particular population | Both                 | More than two instruments | Multiple properties    |
| 42 | 2010 | Kwon et al          | Quality of life of women with urinary incontinence: a systematic literature review.                                                                                                                                    | Studies on the quality of all available validated instruments to measure HRQoL in a particular population | Both                 | More than two instruments | Multiple properties    |
| 43 | 2010 | Luckett et al       | Assessing health-related quality of life in gynecologic oncology: a systematic review of questionnaires and their ability to detect clinically important differences and change.                                       | Studies on the quality of all available validated instruments to measure HRQoL in a particular population | Both                 | More than two instruments | Multiple properties    |
| 44 | 2010 | Palfreyman et al    | Assessing current health-related quality of life questionnaires administered to patients with venous ulcers: Can they be used in economic evaluations?                                                                 | Studies on the quality of all available validated instruments to measure HRQoL in a particular population | Both                 | More than two instruments | Multiple properties    |
| 45 | 2010 | Palfreyman et al    | A systematic review of health-related quality of life instruments used for people with venous ulcers: an assessment of their suitability and psychometric properties.                                                  | Studies on the quality of all available validated instruments to measure HRQoL in a particular population | Both                 | More than two instruments | Multiple properties    |
| 46 | 2010 | Passarelli et al    | Validity Studies of Quality of Life Instruments for Eating Disorders                                                                                                                                                   | Studies on the quality of a selection of instruments to measure HRQoL in a particular population          | Disease-specific     | More than two instruments | Multiple properties    |
| 47 | 2010 | Riordain & McCreary | The use of quality of life measures in oral medicine: A review of the literature                                                                                                                                       | Studies on the quality of all available validated instruments to measure HRQoL in general population      | Both                 | More than two instruments | Multiple properties    |
| 48 | 2010 | Speight & Howarth   | Quality of life in restless legs syndrome: A systematic review of clinical trials and a critical review of instruments.                                                                                                | Studies on the quality of a selection of instruments to measure HRQoL in a particular population          | Disease-specific     | More than two instruments | Multiple properties    |
| 49 | 2010 | Street et al        | Introducing a New Health Related Quality of Life Outcome tool for metastatic disease of the spine                                                                                                                      | Studies on the quality of all available validated instruments to measure HRQoL in a particular population | Both                 | More than two instruments | One specific property  |



| ID | Year | Author                 | Title                                                                                                                                                                                                              | Type of review                                                                                            | Instruments assessed | Number Instruments            | Measurement Properties |
|----|------|------------------------|--------------------------------------------------------------------------------------------------------------------------------------------------------------------------------------------------------------------|-----------------------------------------------------------------------------------------------------------|----------------------|-------------------------------|------------------------|
| 50 | 2010 | Zeng et al             | Quality of life measurement in women with cervical cancer: implications for Chinese cervical cancer survivors                                                                                                      | Studies on the quality of all available validated instruments to measure HRQoL in a particular population | Both                 | More than two instruments     | Multiple properties    |
| 51 | 2011 | Carlton & Kaltenthaler | Health-related quality of life measures (HRQoL) in patients with amblyopia and strabismus: a systematic review.                                                                                                    | Studies on the quality of a selection of instruments to measure HRQoL in a particular population          | Disease-specific     | More than two instruments     | Multiple properties    |
| 52 | 2011 | Carlton & Kaltenthaler | Amblyopia and quality of life: a systematic review                                                                                                                                                                 | Studies on the quality of all available validated instruments to measure HRQoL in a particular population | Both                 | More than two instruments     | Multiple properties    |
| 53 | 2011 | da Silva et al         | Quality of life assessment after Acute Coronary Syndrome: Systematic Review                                                                                                                                        | Studies on the quality of all available validated instruments to measure HRQoL in a particular population | Both                 | More than two instruments     | Multiple properties    |
| 54 | 2011 | Eckstein et al         | Measuring Quality of Life in Cleft Lip and Palate patients: currently available patient reported outcomes                                                                                                          | Studies on the quality of a selection of instruments to measure HRQoL in a particular population          | Disease-specific     | More than two instruments     | Multiple properties    |
| 55 | 2011 | Fayed et al            | Health status and QOL instruments used in childhood cancer research: deciphering conceptual content using World Health Organization definitions                                                                    | Studies on the quality of all available validated instruments to measure HRQoL in a particular population | Both                 | More than two instruments     | One specific property  |
| 56 | 2011 | Glover et al           | Understanding and assessing the impact of End-Stage renal disease on QOL. A systematic review of the content validity...                                                                                           | Studies on the quality of all available validated instruments to measure HRQoL in a particular population | Both                 | More than two instruments     | One specific property  |
| 57 | 2011 | Hounsoms et al         | EQ-5D as a Quality of Life measure in people with dementia and their carers: evidence and key issues                                                                                                               | Studies on the quality of one instrument to measure HRQoL in a particular population                      | Generic              | One instrument                | Multiple properties    |
| 58 | 2011 | Janssen et al          | The use of the EQ-5D preference based health status measure in adults with type 2 diabetes mellitus                                                                                                                | Studies on the quality of one instrument to measure HRQoL in a particular population                      | Generic              | One instrument                | Multiple properties    |
| 59 | 2011 | Kowal- Bielecka        | Analysis of the validation status of WOL and Functional measures in Pulmonary Arterial Hypertension.                                                                                                               | Studies on the quality of a selection of instruments to measure HRQoL in a particular population          | Both                 | Comparison of two instruments | Multiple properties    |
| 60 | 2011 | Lien et al             | Comparison of the EORTC QLQ-C15-PAL and the FACIT-Pal for assessment of quality of life in patients with advanced cancer                                                                                           | Studies on the quality of a selection of instruments to measure HRQoL in a particular population          | Disease-specific     | Comparison of two instruments | One specific property  |
| 61 | 2011 | Luckett et al          | Choosing between the EORTC QLQ-C30 and FACT for measuring health related quality of life in cancer clinical research: issues, evidence and recommendations                                                         | Studies on the quality of a selection of instruments to measure HRQoL in a particular population          | Disease-specific     | Comparison of two instruments | Multiple properties    |
| 62 | 2011 | Mordiffi et al         | Quality of life tools for adult patients with cancer undergoing chemotherapy: a systematic review                                                                                                                  | Studies on the quality of a selection of instruments to measure HRQoL in a particular population          | Disease-specific     | More than two instruments     | Multiple properties    |
| 63 | 2011 | Noyes et al            | EQ-5D for the Assessment of Health-Related Quality of Life and Resource Allocation in Children: A Systematic Methodological Review                                                                                 | Studies on the quality of one instrument to measure HRQoL in a particular population                      | Generic              | One instrument                | Multiple properties    |
| 64 | 2011 | Papaioannou et al      | How valid and responsive are generic health status measures, such as EQ-5D and SF-36, in schizophrenia? A systematic review.                                                                                       | Studies on the quality of a selection of instruments to measure HRQoL in a particular population          | Generic              | More than two instruments     | Multiple properties    |
| 65 | 2011 | Reavey et al           | Measuring quality of life and patient satisfaction after body contouring: a systematic review of patient-reported outcome measures.                                                                                | Studies on the quality of a selection of instruments to measure HRQoL in a particular population          | Disease-specific     | More than two instruments     | Multiple properties    |
| 66 | 2011 | Schiarti et al         | Content comparison of health-related quality of life measures for cerebral palsy based on the International Classification of Functioning Quality of life in people with venous leg ulcers: an integrative review. | Studies on the quality of all available validated instruments to measure HRQoL in a particular population | Both                 | More than two instruments     | One specific property  |
| 67 | 2011 | Tayyem et al           | Analysis of Health-Related quality of life instruments measuring the impact of bariatric surgery: systematic review of instruments and their content validity                                                      | Studies on the quality of all available validated instruments to measure HRQoL in a particular population | Both                 | More than two instruments     | One specific property  |
| 68 | 2011 | Virginia et al         | Quality of life in people with venous leg ulcers: an integrative review                                                                                                                                            | Studies on the quality of all available validated instruments to measure HRQoL in a particular population | Both                 | More than two instruments     | Multiple properties    |
| 69 | 2011 | Whitehurst et al       | Systematic review and empirical comparison of contemporaneous EQ-5D and SF-6D group mean scores                                                                                                                    | Studies on the quality of a selection of instruments to measure HRQoL in general population               | Generic              | Comparison of two instruments | One specific property  |
| 70 | 2011 | Wilson et al           | Spinal cord injury and quality of life: a systematic review of outcome measures                                                                                                                                    | Studies on the quality of all available validated instruments to measure HRQoL in a particular population | Both                 | More than two instruments     | Multiple properties    |
| 71 | 2012 | Bhatt et al            | Health outcome measures for diabetes mellitus: a review                                                                                                                                                            | Studies on the quality of a selection of instruments to measure HRQoL in a particular population          | Disease-specific     | More than two instruments     | Multiple properties    |
| 72 | 2012 | Chopra & Kamal         | A systematic review of quality of life instruments in long-term breast cancer survivors.                                                                                                                           | Studies on the quality of a selection of instruments to measure HRQoL in a particular population          | Disease-specific     | More than two instruments     | Multiple properties    |
| 73 | 2012 | Cormier et al          | Health related quality of life in patients with melanoma. Overview of instruments and outcomes                                                                                                                     | Studies on the quality of all available validated instruments to measure HRQoL in a particular population | Both                 | More than two instruments     | Multiple properties    |
| 74 | 2012 | Correia & De Carlo     | Evaluation of quality of life in a palliative care context: an integrative literature review.                                                                                                                      | Studies on the quality of all available validated instruments to measure HRQoL in a particular population | Both                 | More than two instruments     | Multiple properties    |

| ID | Year | Author               | Title                                                                                                                                                              | Type of review                                                                                            | Instruments assessed | Number Instruments            | Measurement Properties |
|----|------|----------------------|--------------------------------------------------------------------------------------------------------------------------------------------------------------------|-----------------------------------------------------------------------------------------------------------|----------------------|-------------------------------|------------------------|
| 75 | 2012 | Gräske et al         | Dementia-Specific Quality of Life Instruments and Their Appropriateness in Shared-Housing Arrangements--A Literature Study.                                        | Studies on the quality of a selection of instruments to measure HRQoL in a particular population          | Disease-specific     | More than two instruments     | Multiple properties    |
| 76 | 2012 | Ho et al             | Measuring Quality of life and patient satisfaction in facial paralysis patients: a systematic review of patient reported outcome measures                          | Studies on the quality of a selection of instruments to measure HRQoL in a particular population          | Disease-specific     | More than two instruments     | Multiple properties    |
| 77 | 2012 | Hogg et al           | Measures of health related quality of life in diabetes-related foot disease: a systematic review                                                                   | Studies on the quality of all available validated instruments to measure HRQoL in a particular population | Both                 | More than two instruments     | Multiple properties    |
| 78 | 2012 | Luquiens et al       | Quality of life among alcohol-dependent patients: how satisfactory are the available instruments? A systematic review                                              | Studies on the quality of all available validated instruments to measure HRQoL in a particular population | Both                 | More than two instruments     | Multiple properties    |
| 79 | 2012 | Madureira et al      | Quality of life measurements in patients with osteoporosis and fractures                                                                                           | Studies on the quality of all available validated instruments to measure HRQoL in a particular population | Both                 | More than two instruments     | Multiple properties    |
| 80 | 2012 | Milne et al          | Measuring Health-Related Quality of Life for Patients with Diabetic Retinopathy                                                                                    | Studies on the quality of all available validated instruments to measure HRQoL in a particular population | Both                 | More than two instruments     | Multiple properties    |
| 81 | 2012 | Ojo et al            | A Systematic Review of Head and Neck Cancer Quality of Life Assessment Instruments                                                                                 | Studies on the quality of a selection of instruments to measure HRQoL in a particular population          | Disease-specific     | More than two instruments     | Multiple properties    |
| 82 | 2012 | Popovic et al        | Comparison of the EORTC QLQ-BM22 and the FACT-BP for assessment of quality of life in cancer patients with bone metastases                                         | Studies on the quality of a selection of instruments to measure HRQoL in a particular population          | Disease-specific     | Comparison of two instruments | Multiple properties    |
| 83 | 2012 | Quintanilla et al    | Comparison of disease-specific quality of life instruments in the assessment of chronic rhinosinusitis                                                             | Studies on the quality of a selection of instruments to measure HRQoL in a particular population          | Disease-specific     | More than two instruments     | Multiple properties    |
| 84 | 2012 | Rajmil et al         | Health-related quality of life measurement in children and adolescents in Ibero-American countries, 2000 to 2010.                                                  | Studies on the quality of a selection of instruments to measure HRQoL in a particular population          | Both                 | More than two instruments     | Multiple properties    |
| 85 | 2012 | Shin & Shin          | Measurement of quality of life in menopausal women: a systematic review.                                                                                           | Studies on the quality of a selection of instruments to measure HRQoL in a particular population          | Disease-specific     | More than two instruments     | Multiple properties    |
| 86 | 2012 | Smith et al          | Measuring health-related quality of life in diabetic peripheral neuropathy: a systematic review.                                                                   | Studies on the quality of a selection of instruments to measure HRQoL in a particular population          | Disease-specific     | More than two instruments     | Multiple properties    |
| 87 | 2012 | Tosh et al           | A review of generic preference-based measures of health-related quality of life in visual disorders.                                                               | Studies on the quality of all available validated instruments to measure HRQoL in a particular population | Generic              | More than two instruments     | Multiple properties    |
| 88 | 2012 | Townsend-White et al | Review: a systematic review of quality of life measures for people with intellectual disabilities and challenging behaviours                                       | Studies on the quality of all available validated instruments to measure HRQoL in a particular population | Generic              | More than two instruments     | Multiple properties    |
| 89 | 2012 | Walker et al         | Are they worth it? A systematic review of QOL instruments for use with mentally disordered offenders                                                               | Studies on the quality of all available validated instruments to measure HRQoL in a particular population | Both                 | More than two instruments     | Multiple properties    |
| 90 | 2012 | Whitehurst et al     | A review of preference-based health-related quality of life questionnaires in spinal cord injury research.                                                         | Studies on the quality of all available validated instruments to measure HRQoL in a particular population | Generic              | More than two instruments     | Multiple properties    |
| 91 | 2012 | Yip et al            | Reliability, validity and feasibility of quality of life instruments for adult patients with cancer undergoing chemotherapy: Result from a systematic review.      | Studies on the quality of a selection of instruments to measure HRQoL in a particular population          | Disease-specific     | More than two instruments     | Multiple properties    |
| 92 | 2013 | Al Sayah et al       | Health related quality of life measures in Arabic speaking populations: A systematic review on cross-cultural adaptation and measurement properties                | Studies on the quality of all available validated instruments to measure HRQoL in a particular population | Generic              | More than two instruments     | Multiple properties    |
| 93 | 2013 | Basra et al          | Infants' Dermatitis Quality of Life Index: a decade of experience of validation and clinical application.                                                          | Studies on the quality of one instrument to measure HRQoL in a particular population                      | Disease-specific     | One instrument                | Multiple properties    |
| 94 | 2013 | Castelino et al      | Comparison of the psychometric properties of health-related quality of life measures used in adults with systemic lupus erythematosus: a review of the literature. | Studies on the quality of all available validated instruments to measure HRQoL in a particular population | Both                 | More than two instruments     | Multiple properties    |
| 95 | 2013 | Chandratne et al     | Health-related quality of life in gout: a systematic review.                                                                                                       | Studies on the quality of all available validated instruments to measure HRQoL in a particular population | Both                 | More than two instruments     | Multiple properties    |
| 96 | 2013 | Chow et al           | Condition-specific quality of life questionnaires for caregivers of children with pediatric conditions: A systematic review.                                       | Studies on the quality of a selection of instruments to measure HRQoL in a particular population          | Disease-specific     | More than two instruments     | Multiple properties    |
| 97 | 2013 | Davis et al          | A review of the psychometric performance of the EQ-5D in people with urinary incontinence.                                                                         | Studies on the quality of one instrument to measure HRQoL in a particular population                      | Generic              | One instrument                | Multiple properties    |
| 98 | 2013 | de Almeida et al     | Quality of life instruments for skull base pathology: Systematic review and methodologic appraisal                                                                 | Studies on the quality of a selection of instruments to measure HRQoL in a particular population          | Disease-specific     | More than two instruments     | Multiple properties    |
| 99 | 2013 | Djan et al           | A systematic review of questionnaires to measure the impact of appearance on quality of life for head and neck cancer patients.                                    | Studies on the quality of a selection of instruments to measure HRQoL in a particular population          | Both                 | More than two instruments     | Multiple properties    |

| ID  | Year | Author           | Title                                                                                                                                                                                                                        | Type of review                                                                                            | Instruments assessed | Number Instruments        | Measurement Properties |
|-----|------|------------------|------------------------------------------------------------------------------------------------------------------------------------------------------------------------------------------------------------------------------|-----------------------------------------------------------------------------------------------------------|----------------------|---------------------------|------------------------|
| 100 | 2013 | Gakhar et al     | Health-related quality of life assessment after antiretroviral therapy: A review of the literature                                                                                                                           | Studies on the quality of all available validated instruments to measure HRQoL in a particular population | Both                 | More than two instruments | Multiple properties    |
| 101 | 2013 | Hitzig et al     | Identifying and classifying quality-of-life tools for assessing pressure ulcers after spinal cord injury.                                                                                                                    | Studies on the quality of all available validated instruments to measure HRQoL in a particular population | Both                 | More than two instruments | Multiple properties    |
| 102 | 2013 | Jabir et al      | Assessing Improvement in Quality of Life and Patient Satisfaction following Body Contouring Surgery in Patients with Massive Weight Loss: A Critical Review of Outcome Measures Employed.                                    | Studies on the quality of all available validated instruments to measure HRQoL in a particular population | Both                 | More than two instruments | Multiple properties    |
| 103 | 2013 | Lee et al        | A systematic review of patient-reported outcome instruments of nonmelanoma skin cancer in the dermatologic population                                                                                                        | Studies on the quality of a selection of instruments to measure HRQoL in a particular population          | Both                 | More than two instruments | Multiple properties    |
| 104 | 2013 | Levterova et al  | Instruments for disease-specific quality-of-life measurement in patients with type 2 diabetes mellitus--a systematic review.                                                                                                 | Studies on the quality of a selection of instruments to measure HRQoL in a particular population          | Disease-specific     | More than two instruments | Multiple properties    |
| 105 | 2013 | Li et al         | Psychometric properties of self-reported quality of life measures for people with intellectual disabilities: A systematic review.                                                                                            | Studies on the quality of all available validated instruments to measure HRQoL in a particular population | Both                 | More than two instruments | Multiple properties    |
| 106 | 2013 | Lin et al        | Evaluation of content on EQ-5D as compared to disease-specific utility measures.                                                                                                                                             | Studies on the quality of a selection of instruments to measure HRQoL in a particular population          | Both                 | More than two instruments | One specific property  |
| 107 | 2013 | Mitera et al     | Quality of life measures used in radiation therapy trials for patients with metastatic spinal cord compression (MSCC)                                                                                                        | Studies on the quality of all available validated instruments to measure HRQoL in a particular population | Both                 | More than two instruments | Multiple properties    |
| 108 | 2013 | Mogos et al      | A Systematic Review of Quality of Life Measures in Pregnant and Postpartum Mothers.                                                                                                                                          | Studies on the quality of all available validated instruments to measure HRQoL in a particular population | Both                 | More than two instruments | Multiple properties    |
| 109 | 2013 | Mousavi et al    | Assessment of Questionnaires Measuring Quality of Life in Infertile Couples: A Systematic Review.                                                                                                                            | Studies on the quality of all available validated instruments to measure HRQoL in a particular population | Both                 | More than two instruments | One specific property  |
| 110 | 2013 | Moyle et al      | Health-related quality of life in older people with severe dementia: challenges for measurement and management                                                                                                               | Studies on the quality of all available validated instruments to measure HRQoL in a particular population | Both                 | More than two instruments | Multiple properties    |
| 111 | 2013 | Muzzatti et al   | Assessing quality of life in long-term cancer survivors: a review of available tools.                                                                                                                                        | Studies on the quality of all available validated instruments to measure HRQoL in a particular population | Both                 | More than two instruments | Multiple properties    |
| 112 | 2013 | Paltzer et al    | Measuring the health-related quality of life (HRQoL) of young children in resource-limited settings: a review of existing measures.                                                                                          | Studies on the quality of all available validated instruments to measure HRQoL in a particular population | Both                 | More than two instruments | One specific property  |
| 113 | 2013 | Perales et al    | Health-related quality-of-life instruments for Alzheimer's disease and mixed dementia.                                                                                                                                       | Studies on the quality of a selection of instruments to measure HRQoL in a particular population          | Disease-specific     | More than two instruments | Multiple properties    |
| 114 | 2013 | Pusic et al      | Quality of life among breast cancer patients with lymphedema: A systematic review of patient-reported outcome instruments and outcomes.                                                                                      | Studies on the quality of all available validated instruments to measure HRQoL in a particular population | Both                 | More than two instruments | Multiple properties    |
| 115 | 2013 | Roncada et al    | Specific instruments to assess quality of life in children and adolescents with asthma.                                                                                                                                      | Studies on the quality of all available validated instruments to measure HRQoL in a particular population | Disease-specific     | More than two instruments | Multiple properties    |
| 116 | 2013 | Salek et al      | Clinical experience and psychometric properties of the Children's Dermatology Life Quality Index (CDLQI), 1995-2012                                                                                                          | Studies on the quality of one instrument to measures HRQoL in a particular population                     | Disease-specific     | One instrument            | Multiple properties    |
| 117 | 2013 | Testart et al    | Quality of life and other outcome measures in caregivers of patients with schizophrenia                                                                                                                                      | Studies on the quality of all available validated instruments to measure HRQoL in a particular population | Both                 | More than two instruments | Multiple properties    |
| 118 | 2013 | Weldam et al     | Evaluation of Quality of Life instruments for use in COPD care and research: A systematic review.                                                                                                                            | Studies on the quality of all available validated instruments to measure HRQoL in a particular population | Both                 | More than two instruments | Multiple properties    |
| 119 | 2013 | Wheelright et al | A systematic review of health-related quality of life instruments in patients with cancer cachexia                                                                                                                           | Studies on the quality of all available validated instruments to measure HRQoL in a particular population | Both                 | More than two instruments | Multiple properties    |
| 120 | 2013 | Yang et al       | An assessment of validity and responsiveness of generic measures of health-related quality of life in hearing impairment.                                                                                                    | Studies on the quality of all available validated instruments to measure HRQoL in a particular population | Generic              | More than two instruments | Multiple properties    |
| 121 | 2014 | Anthony et al    | Considering quality of life for children with cancer: a systematic review of patient-reported outcome measures and the development of a conceptual model                                                                     | Studies on the quality of all available validated instruments to measure HRQoL in a particular population | Both                 | More than two instruments | One specific property  |
| 122 | 2014 | Aspden et al     | Quality-of-life measures for use within care homes: a systematic review of their measurement properties.                                                                                                                     | Studies on the quality of all available validated instruments to measure HRQoL in a particular population | Both                 | More than two instruments | Multiple properties    |
| 123 | 2014 | Balioussis et al | Identifying and classifying quality of life tools for assessing spasticity after spinal cord injury.                                                                                                                         | Studies on the quality of all available validated instruments to measure HRQoL in a particular population | Both                 | More than two instruments | Multiple properties    |
| 124 | 2014 | Brazier et al    | A systematic review, psychometric analysis and qualitative assessment of generic preference-based measures of health in mental health populations and the estimation of mapping functions from widely used specific measures | Studies on the quality of a selection of instruments to measure HRQoL in a particular population          | Generic              | More than two instruments | Multiple properties    |

| ID  | Year | Author             | Title                                                                                                                                                            | Type of review                                                                                            | Instruments assessed | Number Instruments            | Measurement Properties |
|-----|------|--------------------|------------------------------------------------------------------------------------------------------------------------------------------------------------------|-----------------------------------------------------------------------------------------------------------|----------------------|-------------------------------|------------------------|
| 125 | 2014 | Chiu et al         | Comparison of three shortened questionnaires for assessment of quality of life in advanced cancer.                                                               | Studies on the quality of a selection of instruments to measure HRQoL in a particular population          | Disease-specific     | More than two instruments     | Multiple properties    |
| 126 | 2014 | Chow et al         | Comparison of the EORTC QLQ-BN20 and the FACT-Br quality of life questionnaires for patients with primary brain cancers: a literature review.                    | Studies on the quality of a selection of instruments to measure HRQoL in a particular population          | Disease-specific     | Comparison of two instruments | Multiple properties    |
| 127 | 2014 | Garin et al        | Assessing health-related quality of life in patients with heart failure: a systematic, standardized comparison of available measures.                            | Studies on the quality of a selection of instruments to measure HRQoL in a particular population          | Disease-specific     | More than two instruments     | Multiple properties    |
| 128 | 2014 | Gilchrist et al    | Assessment of the quality of measures of child oral health-related quality of life.                                                                              | Studies on the quality of a selection of instruments to measure HRQoL in a particular population          | Generic              | More than two instruments     | Multiple properties    |
| 129 | 2014 | Grubbs et al       | A review of quality of life measures in dry eye questionnaires.                                                                                                  | Studies on the quality of all available validated instruments to measure HRQoL in a particular population | Both                 | More than two instruments     | Multiple properties    |
| 130 | 2014 | Gupta et al        | The COPD assessment test: a systematic review.                                                                                                                   | Studies on the quality of one instrument to measure HRQoL in a particular population                      | Disease-specific     | One instrument                | Multiple properties    |
| 131 | 2014 | Hawkins et al      | A Systematic Review of Functional and Quality of Life Assessment after Major Lower Extremity Amputation                                                          | Studies on the quality of all available validated instruments to measure HRQoL in a particular population | Both                 | More than two instruments     | Multiple properties    |
| 132 | 2014 | Hewison et al      | An evaluative review of questionnaires recommended for the assessment of quality of life and symptom severity in women with urinary incontinence.                | Studies on the quality of all available validated instruments to measure HRQoL in a particular population | Both                 | More than two instruments     | Multiple properties    |
| 133 | 2014 | Ikeda et al        | Assessment of quality of life in children and youth with autism spectrum disorder: a critical review.                                                            | Studies on the quality of all available validated instruments to measure HRQoL in a particular population | Both                 | More than two instruments     | Multiple properties    |
| 134 | 2014 | Jardine et al      | Self-reported quality of life of young children with conditions from early infancy: a systematic review.                                                         | Studies on the quality of all available validated instruments to measure HRQoL in a particular population | Both                 | More than two instruments     | One specific property  |
| 135 | 2014 | Kuspinar et al     | A review of the psychometric properties of generic utility measures in multiple sclerosis.                                                                       | Studies on the quality of all available validated instruments to measure HRQoL in a particular population | Generic              | More than two instruments     | Multiple properties    |
| 136 | 2014 | Lee et al          | Measurement properties of rheumatoid arthritis-specific quality-of-life questionnaires: Systematic review of the literature.                                     | Studies on the quality of a selection of instruments to measure HRQoL in a particular population          | Disease-specific     | More than two instruments     | Multiple properties    |
| 137 | 2014 | Lieu et al         | Pediatric quality of life in children with otolaryngologic disease: what inventories are available and what is still needed?                                     | Studies on the quality of all available validated instruments to measure HRQoL in a particular population | Both                 | More than two instruments     | Multiple properties    |
| 138 | 2014 | Longworth et al    | Use of generic and condition-specific measures of health-related quality of life in NICE decision-making: a systematic review, statistical modelling and survey. | Studies on the quality of all available validated instruments to measure HRQoL in a particular population | Both                 | More than two instruments     | Multiple properties    |
| 139 | 2014 | Makai et al        | Quality of life instruments for economic evaluations in health and social care for older people: A systematic review.                                            | Studies on the quality of a selection of instruments to measure HRQoL in a particular population          | Generic              | More than two instruments     | Multiple properties    |
| 140 | 2014 | Niu et al          | Health-related quality of life in women with breast cancer: a literature-based review of psychometric properties of breast cancer-specific measures.             | Studies on the quality of a selection of instruments to measure HRQoL in a particular population          | Disease-specific     | More than two instruments     | Multiple properties    |
| 141 | 2014 | Salvilla et al     | Disease-specific health-related quality of life instruments for IgE-mediated food allergy                                                                        | Studies on the quality of a selection of instruments to measure HRQoL in a particular population          | Disease-specific     | More than two instruments     | Multiple properties    |
| 142 | 2014 | Schmidt et al      | Assessing quality of life in patients with prostate cancer: a systematic and standardized comparison of available instruments.                                   | Studies on the quality of a selection of instruments to measure HRQoL in a particular population          | Disease-specific     | More than two instruments     | Multiple properties    |
| 143 | 2014 | Smith et al        | Most domains of the European Organisation for Research and Treatment of Cancer Quality of Life Questionnaire C30 are reliable.                                   | Studies on the quality of one instrument to measure HRQoL in a particular population                      | Disease-specific     | One instrument                | One specific property  |
| 144 | 2014 | Souza et al        | Tools used for evaluation of Brazilian children's quality of life                                                                                                | Studies on the quality of all available validated instruments to measure HRQoL in a particular population | Generic              | More than two instruments     | Multiple properties    |
| 145 | 2014 | Swigris et al      | The psychometric properties of the St George's Respiratory Questionnaire (SGRQ) in patients with idiopathic pulmonary fibrosis: a literature review.             | Studies on the quality of one instrument to measure HRQoL in a particular population                      | Disease-specific     | One instrument                | Multiple properties    |
| 146 | 2014 | Timmerman et al    | Psychometric characteristics of health-related quality-of-life questionnaires in oropharyngeal dysphagia.                                                        | Studies on the quality of a selection of instruments to measure HRQoL in a particular population          | Disease-specific     | More than two instruments     | Multiple properties    |
| 147 | 2014 | Treanor & Donnelly | A methodological review of the Short Form Health Survey 36 (SF-36) and its derivatives among breast cancer survivors                                             | Studies on the quality of a selection of instruments to measure HRQoL in a particular population          | Generic              | More than two instruments     | Multiple properties    |
| 148 | 2014 | Watt et al         | Assessing health-related quality of life in patients with benign non-toxic goitre                                                                                | Studies on the quality of all available validated instruments to measure HRQoL in a particular population | Both                 | More than two instruments     | Multiple properties    |
| 149 | 2014 | Wolpe et al        | Assessing the impact of urinary incontinence on quality of life: systematic review of instruments in Portuguese.                                                 | Studies on the quality of a selection of instruments to measure HRQoL in a particular population          | Disease-specific     | More than two instruments     | Multiple properties    |



| ID  | Year | Author                 | Title                                                                                                                                                                                     | Type of review                                                                                            | Instruments assessed | Number Instruments        | Measurement Properties |
|-----|------|------------------------|-------------------------------------------------------------------------------------------------------------------------------------------------------------------------------------------|-----------------------------------------------------------------------------------------------------------|----------------------|---------------------------|------------------------|
| 150 | 2015 | Alrubaiy et al         | Systematic review of health-related quality of life measures for inflammatory bowel disease                                                                                               | Studies on the quality of a selection of instruments to measure HRQoL in a particular population          | Disease-specific     | More than two instruments | Multiple properties    |
| 151 | 2015 | Aspesberro et al       | Health-related quality of life following pediatric critical illness.                                                                                                                      | Studies on the quality of all available validated instruments to measure HRQoL in a particular population | Both                 | More than two instruments | Multiple properties    |
| 152 | 2015 | Bédard et al           | Systematic review of vision-related quality of life questionnaires for older institutionalised seniors with dementia                                                                      | Studies on the quality of one instrument to measure HRQoL in a particular population                      | Disease-specific     | One instrument            | Multiple properties    |
| 153 | 2015 | Bowling et al          | Quality of life in dementia: a systematically conducted narrative review of dementia-specific measurement scales.                                                                         | Studies on the quality of a selection of instruments to measure HRQoL in a particular population          | Disease-specific     | More than two instruments | Multiple properties    |
| 154 | 2015 | Conijn et al           | Assessing the quality of available patient reported outcome measures for intermittent claudication: a systematic review using the COSMIN checklist.                                       | Studies on the quality of a selection of instruments to measure HRQoL in a particular population          | Disease-specific     | More than two instruments | Multiple properties    |
| 155 | 2015 | de Climens et al       | Review of patient-reported outcome instruments measuring health-related quality of life and satisfaction in patients with type 2 diabetes treated with oral therapy.                      | Studies on the quality of all available validated instruments to measure HRQoL in a particular population | Both                 | More than two instruments | Multiple properties    |
| 156 | 2015 | Dronavalli & Thompson  | A systematic review of measurement tools of health and well-being for evaluating community-based interventions.                                                                           | Studies on the quality of all available validated instruments to measure HRQoL in a particular population | Both                 | More than two instruments | Multiple properties    |
| 157 | 2015 | Hamoen et al           | Measuring health-related quality of life in men with prostate cancer: A systematic review of the most used questionnaires and their validity.                                             | Studies on the quality of all available validated instruments to measure HRQoL in a particular population | Both                 | More than two instruments | Multiple properties    |
| 158 | 2015 | Hu et al               | How Quality of Life as Patient-Reported Outcome Has Been Studied for Rheumatoid Arthritis in Chinese-Speaking Population                                                                  | Studies on the quality of all available validated instruments to measure HRQoL in a particular population | Both                 | More than two instruments | Multiple properties    |
| 159 | 2015 | Janssens et al         | Measurement properties of multidimensional patient-reported outcome measures in neurodisability: a systematic review of evaluation studies.                                               | Studies on the quality of all available validated instruments to measure HRQoL in a particular population | Generic              | More than two instruments | Multiple properties    |
| 160 | 2015 | Launois et al          | Health-related quality-of-life scales specific for chronic venous disorders of the lower limbs.                                                                                           | Studies on the quality of a selection of instruments to measure HRQoL in a particular population          | Disease-specific     | More than two instruments | Multiple properties    |
| 161 | 2015 | Monticone et al        | Measurement properties of translated versions of the Scoliosis Research Society-22 Patient Questionnaire, SRS-22: A systematic review.                                                    | Studies on the quality of one instrument to measure HRQoL in a particular population                      | Disease-specific     | One instrument            | Multiple properties    |
| 162 | 2015 | Nguyen et al           | EORTC QLQ-BR23 and FACT-B for the assessment of quality of life in patients with breast cancer: a literature review.                                                                      | Studies on the quality of a selection of instruments to measure HRQoL in a particular population          | Disease-specific     | More than two instruments | Multiple properties    |
| 163 | 2015 | Oliveira et al         | Evaluation of cross-cultural adaptation and measurement properties of breast cancer-specific quality-of-life questionnaires: A systematic review.                                         | Studies on the quality of a selection of instruments to measure HRQoL in a particular population          | Disease-specific     | More than two instruments | Multiple properties    |
| 164 | 2015 | Polinder et al         | Health-related quality of life after TBI: a systematic review of study design, instruments, measurement properties, and outcome.                                                          | Studies on the quality of all available validated instruments to measure HRQoL in a particular population | Both                 | More than two instruments | Multiple properties    |
| 165 | 2015 | Taghavi et al          | Health-related quality of life in polycystic ovary syndrome patients: A systematic review.                                                                                                | Studies on the quality of one instrument to measure HRQoL in a particular population                      | Disease-specific     | One instrument            | Multiple properties    |
| 166 | 2015 | Wong et al             | Systematic review recommends the European Organization for Research and Treatment of Cancer colorectal cancer-specific module for measuring quality of life in colorectal cancer patients | Studies on the quality of all available validated instruments to measure HRQoL in a particular population | Both                 | More than two instruments | Multiple properties    |
| 167 | 2016 | Algar et al            | Measuring the quality of life and well-being of people with dementia: A review of observational measures.                                                                                 | Studies on the quality of all available validated instruments to measure HRQoL in a particular population | Both                 | More than two instruments | Multiple properties    |
| 168 | 2016 | Bryant et al           | A Systematic Review of Psychometric Properties of Health-Related Quality-of-Life and Symptom Instruments in Adult Acute Leukemia Survivors.                                               | Studies on the quality of all available validated instruments to measure HRQoL in a particular population | Both                 | More than two instruments | Multiple properties    |
| 169 | 2016 | Coombes et al          | Health-related quality-of-life outcome measures in paediatric palliative care: A systematic review of psychometric properties and feasibility of use.                                     | Studies on the quality of all available validated instruments to measure HRQoL in a particular population | Both                 | More than two instruments | Multiple properties    |
| 170 | 2016 | Dichter et al          | Linguistic validation and reliability properties are weak investigated of most dementia-specific quality of life measurements-a systematic review                                         | Studies on the quality of a selection of instruments to measure HRQoL in a particular population          | Disease-specific     | More than two instruments | Multiple properties    |
| 171 | 2016 | Ganesh et al           | Comparison of the FACT-C, EORTC QLQ-CR38, and QLQ-CR29 quality of life questionnaires for patients with colorectal cancer: a literature review.                                           | Studies on the quality of a selection of instruments to measure HRQoL in a particular population          | Generic              | More than two instruments | Multiple properties    |
| 172 | 2016 | Gutiérrez-Vargas et al | Instruments to measure the quality of life in patients with oral mucositis undergoing oncological treatment: a systematic review of the literature.                                       | Studies on the quality of all available validated instruments to measure HRQoL in a particular population | Generic              | More than two instruments | Multiple properties    |
| 173 | 2016 | Hand et al             | Measuring health-related quality of life in adults with chronic conditions in primary care settings: Critical review of concepts and 3 tools                                              | Studies on the quality of all available validated instruments to measure HRQoL in a particular population | Generic              | More than two instruments | Multiple properties    |
| 174 | 2016 | Heinl et al            | Measurement properties of adult quality of life measurement instruments for eczema: a systematic review                                                                                   | Studies on the quality of a selection of instruments to measure HRQoL in a particular population          | Disease-specific     | More than two instruments | Multiple properties    |

| ID  | Year | Author          | Title                                                                                                                                                                                                                                                                                                                     | Type of review                                                                                            | Instruments assessed | Number Instruments            | Measurement Properties |
|-----|------|-----------------|---------------------------------------------------------------------------------------------------------------------------------------------------------------------------------------------------------------------------------------------------------------------------------------------------------------------------|-----------------------------------------------------------------------------------------------------------|----------------------|-------------------------------|------------------------|
| 175 | 2016 | Kotecha et al   | Patient-Reported Outcomes for Quality of Life Assessment in Atrial Fibrillation: A Systematic Review of Measurement Properties.                                                                                                                                                                                           | Studies on the quality of a selection of instruments to measure HRQoL in a particular population          | Disease-specific     | More than two instruments     | Multiple properties    |
| 176 | 2016 | Lee et al       | A systematic review of measurement properties of the instruments measuring health-related quality of life in patients with irritable bowel syndrome.                                                                                                                                                                      | Studies on the quality of a selection of instruments to measure HRQoL in a particular population          | Disease-specific     | More than two instruments     | Multiple properties    |
| 177 | 2016 | Maratia et al   | Assessing health-related quality of life in patients with breast cancer: a systematic and standardized comparison of available instruments using the EMPRO tool.                                                                                                                                                          | Studies on the quality of all available validated instruments to measure HRQoL in a particular population | Both                 | More than two instruments     | Multiple properties    |
| 178 | 2016 | Mestre et al    | Rating scales for behavioral symptoms in Huntington's disease: Critique and recommendations.                                                                                                                                                                                                                              | Studies on the quality of all available validated instruments to measure HRQoL in a particular population | Both                 | More than two instruments     | Multiple properties    |
| 179 | 2016 | Spinou et al    | The validity of health-related quality of life questionnaires in bronchiectasis: a systematic review and meta-analysis                                                                                                                                                                                                    | Studies on the quality of all available validated instruments to measure HRQoL in a particular population | Both                 | More than two instruments     | Multiple properties    |
| 180 | 2016 | Tapia et al     | Health-Related Quality-of-Life Instruments for Pediatric Patients with Diverse Facial Deformities: A Systematic Literature Review                                                                                                                                                                                         | Studies on the quality of a selection of instruments to measure HRQoL in a particular population          | Both                 | More than two instruments     | Multiple properties    |
| 181 | 2016 | Wong et al      | A systematic review of quality of thyroid-specific health related quality of life instruments recommends ThyPRO for patients with benign thyroid diseases                                                                                                                                                                 | Studies on the quality of a selection of instruments to measure HRQoL in a particular population          | Disease-specific     | More than two instruments     | Multiple properties    |
| 182 | 2016 | Woo et al       | Comparison of the EORTC STO-22 and the FACT-Ga quality of life questionnaires for patients with gastric cancer.                                                                                                                                                                                                           | Studies on the quality of a selection of instruments to measure HRQoL in a particular population          | Generic              | Comparison of two instruments | Multiple properties    |
| 183 | 2017 | Ahmadi et al    | Acceptability, reliability, and validity of the Stroke and Aphasia Quality of Life Scale-39 (SAQOL-39) across languages: A systematic review.                                                                                                                                                                             | Studies on the quality of a selection of instruments to measure HRQoL in a particular population          | Disease-specific     | More than two instruments     | Multiple properties    |
| 184 | 2017 | Baghdadli et al | Measurement properties of screening and diagnostic tools for autism spectrum adults of mean normal intelligence: A systematic review.                                                                                                                                                                                     | Studies on the quality of a selection of instruments to measure HRQoL in a particular population          | Disease-specific     | More than two instruments     | Multiple properties    |
| 185 | 2017 | Best et al      | Identifying and classifying quality of life tools for neurogenic bladder function after spinal cord injury: A systematic review.                                                                                                                                                                                          | Studies on the quality of all available validated instruments to measure HRQoL in a particular population | Both                 | More than two instruments     | Multiple properties    |
| 186 | 2017 | Chen et al      | Inflammatory bowel disease-specific health-related quality of life instruments: a systematic review of measurement properties.                                                                                                                                                                                            | Studies on the quality of a selection of instruments to measure HRQoL in a particular population          | Disease-specific     | More than two instruments     | Multiple properties    |
| 187 | 2017 | Frew et al      | Disease-specific health related quality of life patient reported outcome measures in Genodermatoses: a systematic review and critical evaluation.                                                                                                                                                                         | Studies on the quality of a selection of instruments to measure HRQoL in a particular population          | Disease-specific     | More than two instruments     | Multiple properties    |
| 188 | 2017 | Heaney et al    | A review of the psychometric properties and use of the Rheumatoid Arthritis Quality of Life Questionnaire (RaQoL) in clinical research                                                                                                                                                                                    | Studies on the quality of one instrument to measures HRQoL in a particular population                     | Disease-specific     | One instrument                | Multiple properties    |
| 189 | 2017 | Heinl et al     | Measurement properties of quality-of-life measurement instruments for infants, children and adolescents with eczema: a systematic review.                                                                                                                                                                                 | Studies on the quality of a selection of instruments to measure HRQoL in a particular population          | Both                 | More than two instruments     | Multiple properties    |
| 190 | 2017 | Kandel et al    | Patient-reported Outcomes for Assessment of Quality of Life in Refractive Error: A Systematic Review.                                                                                                                                                                                                                     | Studies on the quality of all available validated instruments to measure HRQoL in a particular population | Both                 | More than two instruments     | Multiple properties    |
| 191 | 2017 | Kao et al       | Scoping Review of Pediatric Tonsillectomy Quality of Life Assessment Instruments                                                                                                                                                                                                                                          | Studies on the quality of all available validated instruments to measure HRQoL in a particular population | Both                 | More than two instruments     | Multiple properties    |
| 192 | 2017 | Khan et al      | Health Status and Quality of Life in Tuberculosis: Systematic Review of Study Design, Instruments, Measuring Properties and Outcomes.                                                                                                                                                                                     | Studies on the quality of a selection of instruments to measure HRQoL in a particular population          | Disease-specific     | More than two instruments     | Multiple properties    |
| 193 | 2017 | Kwan et al      | A systematic review of quality-of-life domains and items relevant to patients with spondyloarthritis                                                                                                                                                                                                                      | Studies on the quality of a selection of instruments to measure HRQoL in a particular population          | Disease-specific     | More than two instruments     | One specific property  |
| 194 | 2017 | Limpberg et al  | Health-related quality of life questionnaires in individuals with haemophilia: a systematic review of their measurement properties                                                                                                                                                                                        | Studies on the quality of all available validated instruments to measure HRQoL in a particular population | Both                 | More than two instruments     | Multiple properties    |
| 195 | 2017 | Lucendo et al   | Systematic review: health-related quality of life in children and adults with eosinophilic oesophagitis-instruments for measurement and determinant factors. Systematic review: health-related quality of life in children and adults with eosinophilic oesophagitis-instruments for measurement and determinant factors. | Studies on the quality of all available validated instruments to measure HRQoL in a particular population | Both                 | More than two instruments     | Multiple properties    |
| 196 | 2017 | Page et al      | Instruments measuring the disease-specific quality of life of family carers of people with neurodegenerative diseases: a systematic review.                                                                                                                                                                               | Studies on the quality of a selection of instruments to measure HRQoL in a particular population          | Disease-specific     | More than two instruments     | Multiple properties    |
| 197 | 2017 | Poku et al      | Systematic review assessing the measurement properties of patient-reported outcomes for venous leg ulcers.                                                                                                                                                                                                                | Studies on the quality of all available validated instruments to measure HRQoL in a particular population | Both                 | More than two instruments     | Multiple properties    |
| 198 | 2017 | Roydhouse et al | Systematic review of caregiver responses for patient health-related quality of life in adult cancer care.                                                                                                                                                                                                                 | Studies on the quality of all available validated instruments to measure HRQoL in a particular population | Both                 | More than two instruments     | One specific property  |

| ID  | Year | Author               | Title                                                                                                                                                                                                                              | Type of review                                                                                            | Instruments assessed | Number Instruments            | Measurement Properties |
|-----|------|----------------------|------------------------------------------------------------------------------------------------------------------------------------------------------------------------------------------------------------------------------------|-----------------------------------------------------------------------------------------------------------|----------------------|-------------------------------|------------------------|
| 199 | 2017 | Strada et al         | Measuring quality of life in opioid-dependent people: a systematic review of assessment instruments.                                                                                                                               | Studies on the quality of all available validated instruments to measure HRQoL in a particular population | Both                 | More than two instruments     | Multiple properties    |
| 200 | 2017 | Sullivan et al       | Assessing quality of life of patients with hypospadias: A systematic review of validated patient-reported outcome instruments.                                                                                                     | Studies on the quality of all available validated instruments to measure HRQoL in a particular population | Both                 | More than two instruments     | Multiple properties    |
| 201 | 2017 | Tang et al           | Assessing quality of life in diabetes: II - Deconstructing measures into a simple framework.                                                                                                                                       | Studies on the quality of a selection of instruments to measure HRQoL in a particular population          | Disease-specific     | More than two instruments     | Multiple properties    |
| 202 | 2017 | Tax et al            | Measuring health-related quality of life in cervical cancer patients: a systematic review of the most used questionnaires and their validity.                                                                                      | Studies on the quality of a selection of instruments to measure HRQoL in a particular population          | Disease-specific     | Comparison of two instruments | Multiple properties    |
| 203 | 2017 | Xin & McIntosh       | Assessment of the construct validity and responsiveness of preference-based quality of life measures in people with Parkinson's: a systematic review                                                                               | Studies on the quality of all available validated instruments to measure HRQoL in a particular population | Both                 | More than two instruments     | Multiple properties    |
| 204 | 2018 | Aber et al           | Themes that Determine Quality of Life in Patients with Peripheral Arterial Disease: A Systematic Review                                                                                                                            | Studies on the quality of all available validated instruments to measure HRQoL in a particular population | Both                 | More than two instruments     | One specific property  |
| 205 | 2018 | Chiarotto et al      | Evidence on the measurement properties of health-related quality of life instruments is largely missing in patients with low back pain, a systematic review.                                                                       | Studies on the quality of all available validated instruments to measure HRQoL in a particular population | Generic              | More than two instruments     | Multiple properties    |
| 206 | 2018 | Cornelissen et al    | Quality of Life Questionnaires in Breast Cancer-Related Lymphedema Patients: Review of the Literature                                                                                                                              | Studies on the quality of all available validated instruments to measure HRQoL in a particular population | Both                 | More than two instruments     | One specific property  |
| 207 | 2018 | de Vries et al       | Recommendations on the most suitable quality-of-life measurement instruments for bariatric and body contouring surgery: a systematic review.                                                                                       | Studies on the quality of a selection of instruments to measure HRQoL in a particular population          | Disease-specific     | More than two instruments     | Multiple properties    |
| 208 | 2018 | Dow et al            | How best to assess quality of life in informal carers of people with dementia; A systematic review of existing outcome measures                                                                                                    | Studies on the quality of all available validated instruments to measure HRQoL in a particular population | Both                 | More than two instruments     | Multiple properties    |
| 209 | 2018 | Grobet et al         | Application and measurement properties of EQ-5D to measure quality of life in patients with upper extremity orthopaedic disorders: a systematic literature review.                                                                 | Studies on the quality of one instrument to measure HRQoL in a particular population                      | Generic              | One instrument                | Multiple properties    |
| 210 | 2018 | Haywood et al        | Assessing health-related quality of life (HRQoL) in survivors of out-of-hospital cardiac arrest: A systematic review of patient-reported outcome measures                                                                          | Studies on the quality of all available validated instruments to measure HRQoL in a particular population | Both                 | More than two instruments     | Multiple properties    |
| 211 | 2018 | Luan et al           | A Review of Studies of Quality of Life for Chinese-Speaking Patients with Ischemic Heart Disease                                                                                                                                   | Studies on the quality of a selection of instruments to measure HRQoL in a particular population          | Both                 | More than two instruments     | Multiple properties    |
| 212 | 2018 | Mason et al          | Evaluating patient-reported outcome measures (PROMs) for bladder cancer: a systematic review using the Consensus-based Standards for the selection of health Measurement Instruments (COSMIN)                                      | Studies on the quality of all available validated instruments to measure HRQoL in a particular population | Both                 | More than two instruments     | Multiple properties    |
| 213 | 2018 | Mohammed et al       | Pharmaceutical care and health related quality of life outcomes over the past 25 years: Have we measured dimensions that really matter?                                                                                            | Studies on the quality of all available validated instruments to measure HRQoL in a particular population | Both                 | More than two instruments     | One specific property  |
| 214 | 2018 | Mpundu-Kaambwa et al | A review of preference-based measures for the assessment of quality of life in children and adolescents with cerebral palsy.                                                                                                       | Studies on the quality of a selection of instruments to measure HRQoL in a particular population          | Both                 | More than two instruments     | Multiple properties    |
| 215 | 2018 | Pollo et al          | Evaluation Instruments for Quality of Life Related to Melasma: An Integrative Review.                                                                                                                                              | Studies on the quality of one instrument to measure HRQoL in a particular population                      | Disease-specific     | One instrument                | Multiple properties    |
| 216 | 2018 | Tian & Cao           | Systematic review of the psychometric properties of disease-specific, quality-of-life questionnaires for patients with hepatobiliary or pancreatic cancers                                                                         | Studies on the quality of a selection of instruments to measure HRQoL in a particular population          | Disease-specific     | More than two instruments     | Multiple properties    |
| 217 | 2018 | van Ierssel et al    | Identifying the concepts contained within health-related quality of life outcome measures in concussion research using the International Classification of Functioning, Disability, and Health as a reference: a systematic review | Studies on the quality of a selection of instruments to measure HRQoL in a particular population          | Disease-specific     | More than two instruments     | One specific property  |
| 218 | 2018 | van Roij et al       | Measuring health-related quality of life in patients with advanced cancer: a systematic review of self-administered measurement instruments.                                                                                       | Studies on the quality of all available validated instruments to measure HRQoL in a particular population | Both                 | More than two instruments     | Multiple properties    |
| 219 | 2018 | Yarlas et al         | Psychometric validation of the SF-36@Health Survey in ulcerative colitis: results from a systematic literature review                                                                                                              | Studies on the quality of one instrument to measure HRQoL in a particular population                      | Generic              | One instrument                | Multiple properties    |
| 220 | 2018 | Yazdani et al        | Psychometric Properties of Quality of Life Assessment Tools in Morbid Obesity: A Review of Literature.                                                                                                                             | Studies on the quality of all available validated instruments to measure HRQoL in a particular population | Both                 | More than two instruments     | Multiple properties    |
| 221 | 2018 | Zaror et al          | Assessing oral health-related quality of life in children and adolescents : a systematic review and standardized comparison of available instruments                                                                               | Studies on the quality of all available validated instruments to measure HRQoL in a particular population | Both                 | More than two instruments     | Multiple properties    |
| 222 | 2018 | Hettiarachchi et al  | Pediatric Quality of Life Instruments in Oral Health Research: A Systematic Review                                                                                                                                                 | Studies on the quality of all available validated instruments to measure HRQoL in a particular population | Both                 | More than two instruments     | Multiple properties    |

| ID  | Year | Author             | Title                                                                                                                                                                             | Type of review                                                                                            | Instruments assessed | Number Instruments        | Measurement Properties |
|-----|------|--------------------|-----------------------------------------------------------------------------------------------------------------------------------------------------------------------------------|-----------------------------------------------------------------------------------------------------------|----------------------|---------------------------|------------------------|
| 223 | 2019 | Hughes et al       | Psychometric properties and feasibility of use of dementia specific quality of life instruments for use in care settings: a systematic review                                     | Studies on the quality of a selection of instruments to measure HRQoL in a particular population          | Disease-specific     | More than two instruments | Multiple properties    |
| 224 | 2019 | Speyer et al       | "Measurement properties of self-report questionnaires on health related quality of life and functional health status in dysphonia: a systematic review using the COSMIN taxonomy" | Studies on the quality of all available validated instruments to measure HRQoL in a particular population | Both                 | More than two instruments | Multiple properties    |
| 225 | 2019 | van der Hout et al | Measuring health-related quality of life in colorectal cancer patients: systematic review of measurement properties of the EORTC QLQ-CR29                                         | Studies on the quality of one instrument to measure HRQoL in a particular population                      | Generic              | One instrument            | Multiple properties    |
| 226 | 2019 | Vasconcelos et al  | Quality of Life in Women with Defecatory Dysfunctions: Systematic Review of Questionnaires Validated in the Portuguese Language                                                   | Studies on the quality of a selection of instruments to measure HRQoL in a particular population          | Disease-specific     | More than two instruments | Multiple properties    |

Note: The concept "Both" is referred to generic and disease-specific instruments.

For peer review only



## REFERENCES

1. Barbosa T, Gavião M. Oral health-related quality of life in children: Part III. Is there agreement between parents in rating their children's oral health-related quality of life? A systematic review. *Int J Dent Hyg*. 2008;6(2):108–13.
2. Basra MKA, Fenech R, Gatt RM, Salek MS, Finlay AY. The Dermatology Life Quality Index 1994-2007: A comprehensive review of validation data and clinical results. *Br J Dermatol*. 2008;159(5):997–1035.
3. Carabin H, Sonleitner N, Keesee M, Shinault K. Quality of life measurement tools for people living with HIV/AIDS. *J HIV/AIDS Soc Serv*. 2008;7(1):71–82.
4. Chassany O, Holtmann G, Malagelada J, Gebauer U, Doerfler H, Devault K. Systematic review: health-related quality of life (HRQOL) questionnaires in gastro-oesophageal reflux disease. *Aliment Pharmacol Ther*. 2008;27(11):1053–70.
5. El Achhab Y, Nejjarci C, Chikri M, Lyoussi B. Disease-specific health-related quality of life instruments among adults diabetic: A systematic review. *Diabetes Res Clin Pract*. 2008;80(2):171–84.
6. Finger RP, Fleckenstein M, Holz FG, Scholl HPN. Quality of life in age-related macular degeneration: a review of available vision-specific psychometric tools. *Qual Life Res*. 2008;17(4):559–74.
7. Franic DM, Bothe AK. Psychometric Evaluation of Condition-Specific Instruments Used to Assess Health-Related Quality of Life, Attitudes, and Related Constructs in Stuttering. *Am J Speech*. 2008;17(1):60–80.
8. Janssens L, Gorter JW, Ketelaar M, Kramer WLM, Holtslag HR. Health-related quality-of-life measures for long-term follow-up in children after major trauma. *Qual Life Res*. 2008;17(5):701–13.
9. Klassen AF, Stotland MA, Skarsgard ED, Pusic AL. Clinical research in pediatric plastic surgery and systematic review of quality-of-life questionnaires. *Clin Plast Surg*. 2008;35:251–7.
10. Kluivers KB, Riphagen I, Vierhout ME, Brölmann HAM, de Vet HCW. Systematic review on recovery specific quality-of-life instruments. *Surgery*. 2008;143(2):206–15.
11. Langham S, Maggi M, Schulman C, Quinton R, Uhl-Hochgraeber K. Health-related quality of life instruments in studies of adult men with testosterone deficiency syndrome: A critical assessment. *J Sex Med*. 2008;5(12):2842–52.
12. Pearce NJM, Sanson-Fisher R, Campbell HS. Measuring quality of life in cancer survivors: a methodological review of existing scales. *Psychooncology*. 2008;17(7):629–40.
13. Price MA, Hill CD, Williams VS, Morlock RJ, Leewenkamp O, Patterson T. Measures of functional status and quality-of-life in schizophrenia. *Curr Psychiatry Rev*. 2008;4(1):28–38.
14. Quittner AL, Modi A, Cruz I. Systematic review of health-related quality of life measures for children with respiratory conditions. *Paediatr Respir Rev*. 2008;9(3):220–32.
15. Reaney MD, Martin C, Speight J. Understanding and Assessing the Impact of Alcoholism on Quality of Life. *Patient*. 2008;1(3):151–63.
16. Schlarman J, Metzger-Blau S, Schnepf W, Schlarman JG, Metzger-Blau S, Schnepf W, et al. The use of health-related quality of life (HRQOL) in children and adolescents as an outcome criterion to evaluate family oriented support for young carers in Germany: an integrative review of the literature. *BMC Public Health*. 2008;8(1):414.
17. Solans M, Pane S, Estrada M-D, Serra-Sutton V, Berra S, Herdman M, et al. Health-related quality of life measurement in children and adolescents: A systematic review of generic and disease-specific instruments. *Value Heal*. 2008;11(4):742–64.
18. Tschiesner U, Rogers SN, Harréus U, Berghaus A, Cieza A. Content comparison of quality of life questionnaires used in head and neck cancer based on the international classification of functioning, disability and health: A systematic review. *Eur Arch Oto-Rhino-Laryngology*. 2008;265(6):627–37.
19. Upton P, Lawford J, Eiser C. Parent-child agreement across child health-related quality of life instruments: a review of the literature. *Qual Life Res*. 2008;17(6):895–913.
20. Davies N. Measuring health-related. *Nurs Stand*. 2009;23(30):42–50.
21. Derrett S, Black J, Herbison GP. Outcome after injury-a systematic literature search of studies using the EQ-5D. *J Trauma*. 2009;67(4):883–90.
22. Epton J, Harris R, Jenkinson C. Quality of life in amyotrophic lateral sclerosis/motor neuron disease: a structured review. *Amyotroph Lateral Scler*. 2009;10(1):15–26.
23. Fitzsimmons D, Gilbert J, Howse F, Young T, Arraras JI, Brédart A, et al. A systematic review of the use and validation of health-related quality of life instruments in older cancer patients. *Eur J Cancer*. 2009;45(1):19–32.
24. Garin O, Ferrer M, Pont À, Rué M, Kotzeva A, Wiklund I, et al. Disease-specific health-related quality of life questionnaires for heart failure: A systematic review with meta-analyses. *Qual Life Res*. 2009;18(1):71–85.
25. Garvie PA, Lawford J, Banet MS, West RL. Quality of life measurement in paediatric and adolescent populations with HIV: A review of the literature. *Childcare, Heal Dev*. 2009;35(4):440–53.
26. Guo N, Marra F, Marra CA. Measuring health-related quality of life in tuberculosis: a systematic review. *Health Qual Life Outcomes*. 2009;7:14.
27. Jay CL, Butt Z, Ladner DP, Skaro AI, Abecassis MM. A review of quality of life instruments used in liver transplantation. *J Hepatol*. 2009;51(5):949–59.
28. Speight J, Reaney MD, Barnard KD. Not all roads lead to Rome-a review of quality of life measurement in adults with diabetes. *Diabet Med*. 2009;26(4):315–27.
29. Street J, Berven S, Fisher C, Ryken T. Health Related Quality of Life Assessment in Metastatic Disease of the Spine. *Spine (Phila Pa 1976)*. 2009;34(Supplement):S128–34.
30. Waters E, Davis E, Ronen GM, Rosenbaum P, Livingston M, Saigal S. Quality of life instruments for children and adolescents with neurodisabilities: How to choose the appropriate instrument. Vol. 51, *Developmental Medicine & Child Neurology*. 2009. p. 660–9.

- 1  
2  
3  
4  
5  
6  
7  
8  
9  
10  
11  
12  
13  
14  
15  
16  
17  
18  
19  
20  
21  
22  
23  
24  
25  
26  
27  
28  
29  
30  
31  
32  
33  
34  
35  
36  
37  
38  
39  
40  
41  
42  
43  
44  
45  
46  
47  
48  
49  
50  
51  
52  
53  
54  
55  
56  
57  
58  
59  
60  
61
31. Wettergren L, Kettis-Lindblad Å, Sprangers M, Ring L. The use, feasibility and psychometric properties of an individualised quality-of-life instrument: A systematic review of the SEIQoL-DW. *Qual Life Res.* 2009;18(6):737–46.
32. Albers G, Echteld MA, de Vet HCW, Onwuteaka-Philipsen BD, van der Linden MHM, Deliens L. Evaluation of quality-of-life measures for use in palliative care: a systematic review. *Palliat Med.* 2010;24(1):17–37.
33. Branski RC, Cukier-Blaj S, Pusic A, Cano SJ, Klassen A, Mener D, et al. Measuring quality of life in dysphonic patients: a systematic review of content development in patient-reported outcomes measures. *J Voice.* 2010;23(2):193–8.
34. Bronsard V, Paul C, Prey S, Puzenat E, Gourraud P-A, Aractingi S, et al. What are the best outcome measures for assessing quality of life in plaque type psoriasis? A systematic review of the literature. *J Eur Acad Dermatology Venereol.* 2010;24 Suppl 2:17–22.
35. Carlon S, Shields N, Yong K, Gilmore R, Sakzewski L, Boyd R. A systematic review of the psychometric properties of Quality of Life measures for school aged children with cerebral palsy. *BMC Pediatr.* 2010;10:81.
36. Chen CM, Cano SJ, Klassen AF, King T, McCarthy C, Cordeiro PG, et al. Measuring Quality of Life in Oncologic Breast Surgery: A Systematic Review of Patient-Reported Outcome Measures. *Breast J.* 2010;16(6):587–97.
37. Danquah FVN, Wasserman J, Meininger J, Bergstrom N. Quality of life measures for patients on hemodialysis: a review of psychometric properties. *Nephrol Nurs J.* 2010;37(3):255–69; quiz 270.
38. Forhan M, Vrkljan B, MacDermid J. A systematic review of the quality of psychometric evidence supporting the use of an obesity-specific quality of life measure for use with persons who have class III obesity: Diagnostic in Obesity and Complications. *Obes Rev.* 2010;11(3):222–8.
39. Hill MR, Noonan VK, Sakakibara BM, Miller WC, SCIRE. Quality of life instruments and definitions in individuals with spinal cord injury: A systematic review. *Spinal Cord.* 2010;48(6):438–50.
40. Kamalski DM, Hoekstra CE, van Zanten BG, Grolman W, Rovers MM. Measuring disease-specific health-related quality of life to evaluate treatment outcomes in tinnitus patients: a systematic review. *Otolaryngol Neck Surg.* 2010;143(2):181–5.
41. Klassen AF, Strohm SJ, Maurice-Stam H, Grootenhuis MA. Quality of life questionnaires for children with cancer and childhood cancer survivors: a review of the development of available measures. *Support Care Cancer.* 2010 Sep;18(9):1207–17.
42. Kwon BE, Kim GY, Son YJ, Roh YS, You MA. Quality of life of women with urinary incontinence: a systematic literature review. *Int Neurourol J.* 2010;14(3):133–8.
43. Luckett T, King M, Butow P, Friedlander M, Paris T. Assessing health-related quality of life in gynecologic oncology: a systematic review of questionnaires and their ability to detect clinically important differences and change. *Int J Gynecol Cancer.* 2010;20(4):664–84.
44. Palfreyman SJ, Shackley P, Brazier JE. Assessing current health-related quality of life questionnaires administered to patients with venous ulcers: Can they be used in economic evaluations? Vol. 19, *Journal of Clinical Nursing.* 2010. p. 892–7.
45. Palfreyman SJ, Tod AM, Brazier JE, Michaels JA, SJ P, AM T, et al. A systematic review of health-related quality of life instruments used for people with venous ulcers: an assessment of their suitability and psychometric properties. *J Clin Nurs.* 2010;19(19–20):2673–703.
46. Passarelli P, Stefano SC, Blay SL. Validity Studies of Quality of Life Instruments for Eating Disorders. *J Nerv Ment Dis.* 2010;198(12):854–9.
47. Riordain RN, McCreary C. The use of quality of life measures in oral medicine: A review of the literature. *Oral Dis.* 2010;16(5):419–30.
48. Speight J, Howarth A. Quality of life in restless legs syndrome: A systematic review of clinical trials and a critical review of instruments. Vol. 3, *The Patient.* 2010. p. 185–203.
49. Street J, Lenehan B, Berven S, Fisher C. Introducing a New Health-Related Quality of Life Outcome Tool for Metastatic Disease of the Spine. *Spine (Phila Pa 1976).* 2010;35(14):1377–86.
50. Zeng YC, Ching SSY, Loke AY. Quality of life measurement in women with cervical cancer: implications for Chinese cervical cancer survivors. Vol. 8, *Health and Quality of Life Outcomes.* 2010. p. 30.
51. Carlton J, Kaltenthaler E. Amblyopia and quality of life: a systematic review. *Eye.* 2011;25(4):403–13.
52. Carlton J, Kaltenthaler E. Health-related quality of life measures (HRQoL) in patients with amblyopia and strabismus: A systematic review. *Br J Ophthalmol.* 2011;95(3):325–30.
53. da Silva SA, Passos SRL, Carballo MT, Figueiró M. Quality of Life Assessment after Acute Coronary Syndrome : Systematic Review. *Arq Bras Cardiol.* 2011;97(6):526–40.
54. Eckstein DA, Wu RL, Akinbiyi T, Silver L, Taub PJ. Measuring Quality of Life in Cleft Lip and Palate Patients. *Plast Reconstr Surg.* 2011;128(5):518e–526e.
55. Fayed N, Schiariti V, Bostan C, Cieza A, Klassen A. Health status and QOL instruments used in childhood cancer research: deciphering conceptual content using World Health Organization definitions. *Qual Life Res.* 2011;20(8):1247–58.
56. Glover C, Banks P, Carson A, Martin CR, Duffy T. Understanding and Assessing the Impact of Alcoholism on Quality of Life. *Patient.* 2011;4(1):10–30.
57. González-Consuegra RV, Verdú J. Quality of life in people with venous leg ulcers: An integrative review. *J Adv Nurs.* 2011;67(5):926–44.
58. Hounsome N, Orrell M, Edwards RT. EQ-5D as a quality of life measure in people with dementia and their carers: evidence and key issues. *Value Heal.* 2011;14(2):390–9.
59. Janssen MF, Lubetkin EI, Sekhobo JP, Pickard AS. The use of the EQ-5D preference-based health status measure in adults with Type 2 diabetes mellitus. *Diabet Med.* 2011;28(4):395–413.
60. Kowal-Bielecka O, Avouac J, Pittrow D, Huscher D, Behrens F, Denton CP, et al. Analysis of the validation status of quality of life and functional disability measures in pulmonary arterial hypertension related to systemic sclerosis: Results of a systematic literature analysis by the expert panel on outcomes measures in pulmonary art. *J Rheumatol.* 2011;38(11):2419–27.
61. Lien K, Zeng L, Nguyen J, Cramarossa G, Culleton S, Caissie A, et al. Comparison of the EORTC QLQ-C15-PAL and the FACIT-Pal for assessment of quality of life in patients with advanced cancer. *Expert Rev Pharmacoecon Outcomes Res.* 2011;11(5):541–6.

- 1 62. Luckett T, King MT, Butow PN, Oguchi M, Rankin N, Price MA, et al. Choosing between the EORTC QLQ-C30 and FACT-G for measuring health-related quality of life in cancer clinical research: Issues, evidence and recommendations. *Ann Oncol*. 2011;22(10):2179–90.
- 2 63. Mordiffi SZ, Kin YW, NK EA. Quality of life tools for adult patients with cancer undergoing chemotherapy: a systematic review. *JBI*. 2011;9(57):2482–532.
- 3 64. Noyes J, Edwards RT. EQ-5D for the assessment of health-related quality of life and resource allocation in children: A systematic methodological review. *Value Heal*. 2011;14(8):1117–29.
- 4 65. Papaioannou D, Brazier J, Parry G. How valid and responsive are generic health status measures, such as EQ-5D and SF-36, in Schizophrenia? A systematic review. *Value Heal*. 2011;14(6):907–20.
- 5 66. Reavey PL, Klassen AF, Cano SJ, McCarthy C, Scott A, Rubin JP, et al. Measuring quality of life and patient satisfaction after body contouring: a systematic review of patient-reported outcome measures. *Aesthetic Surg J*. 2011;31(7):807–13.
- 6 67. Schiariti V, Fayed N, Cieza A, Klassen A, O'Donnell M. Content comparison of health-related quality of life measures for cerebral palsy based on the International Classification of Functioning. Vol. 33, *Disability and Rehabilitation*. Informa Healthcare; 2011. p. 1330–9.
- 7 68. Tayyem R, Ali A, Atkinson J, Martin CR. Analysis of Health-Related Quality-of-Life Instruments Measuring the Impact of Bariatric Surgery. *Patient*. 2011;4(2):73–87.
- 8 69. Whitehurst DGT, Bryan S, Lewis M. Systematic review and empirical comparison of contemporaneous EQ-5D and SF-6D group mean scores. *Med Decis Making*. 2011;31(6):E34–44.
- 9 70. Wilson JR, Hashimoto RE, Dettori JR, Fehlings MG. Spinal cord injury and quality of life: a systematic review of outcome measures. *Evid Based Spine Care J*. 2011;2(1):37–44.
- 10 71. Bhatt JK, Thomas S, Nanjan MJ. Health outcome measures for diabetes mellitus: A review. Vol. 7, *Applied Research in Quality of Life*. Springer; 2012. p. 413–43.
- 11 72. Chopra I, Kamal KM. A systematic review of quality of life instruments in long-term breast cancer survivors. *Health Qual Life Outcomes*. 2012;10(1):1–15.
- 12 73. Cormier JN, Cromwell DD, Ross MI. Health-related quality of life in patients with melanoma: overview of instruments and outcomes. *Dermatol Clin*. 2012;30(2):245–54.
- 13 74. Correia FR, De Carlo MMR do P. Evaluation of quality of life in a palliative care context: an integrative literature review. *Rev Lat Am Enfermagem*. 2012;20(2):401–10.
- 14 75. Gräske J, Fischer T, Kuhlmeier A, Wolf-Ostermann K. Dementia-Specific Quality of Life Instruments and Their Appropriateness in Shared-Housing Arrangements-A Literature Study. *Geriatr Nurs (Minneapolis)*. 2012;33(3):204–16.
- 15 76. Ho AL, Scott AM, Klassen AF, Cano SJ, Pusic AL, Van Laeken N. Measuring Quality of Life and Patient Satisfaction in Facial Paralysis Patients. *Plast Reconstr Surg*. 2012 Jul;130(1):91–9.
- 16 77. Hogg FRA, Peach G, Price P, Thompson MM, Hinchliffe RJ. Measures of health-related quality of life in diabetes-related foot disease: A systematic review. *Diabetologia*. 2012;55(3):552–65.
- 17 78. Luquiens A, Reynaud M, Falissard B, Aubin HJ. Quality of life among alcohol-dependent patients: How satisfactory are the available instruments? A systematic review. Vol. 125, *Drug and Alcohol Dependence*. 2012. p. 192–202.
- 18 79. Madureira MM, Ciconelli RM, Pereira RMR. Quality of life measurements in patients with osteoporosis and fractures. *Clinics*. 2012;67(11):1315–20.
- 19 80. Milne A, Johnson JA, Tennant M, Rudniski C, Dryden DM. Measuring Health-Related Quality of Life for Patients With Diabetic Retinopathy. *Technol Assess*. 2012;267–309.
- 20 81. Ojo B, Genden EM, Teng MS, Milbury K, Misisukiewicz KJ, Badr H. A systematic review of head and neck cancer quality of life assessment instruments. *Oral Oncol*. 2012;48(10):92–937.
- 21 82. Popovic M, Nguyen J, Chen E, Di Giovanni J, Zeng L, Chow E. Comparison of the EORTC QLQ-BM22 and the FACT-BP for assessment of quality of life in cancer patients with bone metastases. *Expert Rev Pharmacoeconomics Outcomes Res*. 2012;12(2):213–9.
- 22 83. Quintanilla-Dieck L, Litvack JR, Made JC, Smith TL. Comparison of disease-specific quality-of-life instruments in the assessment of chronic rhinosinusitis. *Int Forum Allergy Rhinol*. 2012;2(6):437–43.
- 23 84. Rajmil L, Roizen M, Psy AU, Hidalgo-Rasmussen C, Fernandez G, Dapuerto JJ. Health-related quality of life measurement in children and adolescents in Ibero-American countries, 2000 to 2010. *Value Heal*. 2012;15(2):312–22.
- 24 85. Shin H, Shin HS. Measurement of quality of life in menopausal women: a systematic review. *West J Nurs Res*. 2012;34(4):475–503.
- 25 86. Smith SC, Lamping DL, Maclaine GDH. Measuring health-related quality of life in diabetic peripheral neuropathy: a systematic review. *Diabetes Res Clin Pract*. 2012;96(3):261–70.
- 26 87. Tosh J, Brazier J, Evans P, Longworth L. A review of generic preference-based measures of health-related quality of life in visual disorders. *Value Heal*. 2012;15(1):118–27.
- 27 88. Townsend-White C, Pham ANT, Vassos M V. Review: a systematic review of quality of life measures for people with intellectual disabilities and challenging behaviours. *J Intellect Disabil Res*. 2012;56(3):270–84.
- 28 89. Walker H, Tulloch L, Martin C. Are they worth it? A systematic review of QOL instruments for use with mentally disordered offenders who have a diagnosis of psychosis. Vol. 14, *The British Journal of Forensic Practice*. 2012. p. 252–68.
- 29 90. Whitehurst DGT, Noonan VK, Dvorak MFS, Bryan S. A review of preference-based health-related quality of life questionnaires in spinal cord injury research. *Spinal Cord*. 2012;50(9):646–54.
- 30 91. Yip WK, Mordiffi SZ, Ang E. Reliability, validity and feasibility of quality of life instruments for adult patients with cancer undergoing chemotherapy: Result from a systematic review. *Int J Evid Based Healthc*. 2012;10(1):27–52.
- 31 92. Al Sayah F, Ishaque S, Lau D, Johnson JA. Health related quality of life measures in Arabic speaking populations: A systematic review on cross-cultural adaptation and measurement properties. *Qual Life Res*. 2013;22(1):213–29.

93. Basra MKA, Gada V, Ungaro S, Finlay AY, Salek SM. Infants' Dermatitis Quality of Life Index: a decade of experience of validation and clinical application. *Br J Dermatol*. 2013;169(4):760–8.
94. Castelino M, Abbott J, McElhone K, Teh LS. Comparison of the psychometric properties of health-related quality of life measures used in adults with systemic lupus erythematosus: A review of the literature. *Rheumatology*. 2013;52(4):684–96.
95. Chandratre P, Roddy E, Clarson L, Richardson J, Hider SL, Mallen CD. Health-related quality of life in gout: A systematic review. *Rheumatology*. 2013;52(11):2031–40.
96. Chow MYK, Morrow AM, Cooper Robbins SC, Leask J. Condition-specific quality of life questionnaires for caregivers of children with pediatric conditions: A systematic review. *Qual Life Res*. 2013;22(8):2183–200.
97. Davis S, Wailoo A. A review of the psychometric performance of the EQ-5D in people with urinary incontinence. *Health Qual Life Outcomes*. 2013;11:20.
98. de Almeida JR, Witterick IJ, Gullane PJ, Gentili F, Lohfeld L, Ringash J, et al. Quality of life instruments for skull base pathology: Systematic review and methodologic appraisal. *Head Neck*. 2013;36(10):1391.
99. Djan R, Penington A. A systematic review of questionnaires to measure the impact of appearance on quality of life for head and neck cancer patients. *J Plast Reconstr Aesthetic Surg*. 2013;66(5):647–59.
100. Gakhar H, Kamalli A, Holodniy M. Health-related Quality of Life Assessment after Antiretroviral Therapy: A Review of the Literature. *Drugs*. 2013;73(7):651–72.
101. Hitzig SL, Balioussis C, Nussbaum E, McGillivray CF, Catharine Craven B, Noreau L. Identifying and classifying quality-of-life tools for assessing pressure ulcers after spinal cord injury. *J Spinal Cord Med*. 2013;36(6):600–15.
102. Jabir S. Assessing Improvement in Quality of Life and Patient Satisfaction following Body Contouring Surgery in Patients with Massive Weight Loss: A Critical Review of Outcome Measures Employed. *Plast Surg Int*. 2013;
103. Lee EH, Klassen AF, Nehal KS, Cano SJ, Waters J, Pusic AL. A systematic review of patient-reported outcome instruments of nonmelanoma skin cancer in the dermatologic population. *J Am Acad Dermatol*. 2013;69(2):e59–67.
104. Levterova BA, Dimitrova DD, Levterov GE, Dragova EA. Instruments for Disease-Specific Quality-of-Life Measurement in Patients with Type 2 Diabetes Mellitus - A Systematic Review / Инструменты Для Оценки Специфического Качества Жизни Пациентов, Больных Сахарным Диабетом Типа 2. *Folia Med (Plovdiv)*. 2013;55(1):83–92.
105. Li C, Tsoi EWS, Zhang AL, Chen S, Wang CKJ. Psychometric properties of self-reported quality of life measures for people with intellectual disabilities: A systematic review. Vol. 25, *Journal of Developmental and Physical Disabilities*. Springer; 2013. p. 253–70.
106. Lin FJ, Longworth L, Pickard AS. Evaluation of content on EQ-5D as compared to disease-specific utility measures. *Qual Life Res*. 2013;22(4):853–74.
107. Mitera G, Zeiadin N, Sahgal A, Finkelstein J, Chow E, Loblaw A. Quality of life measures used in radiation therapy trials for patients with Metastatic Spinal Cord Compression (MSCC). In: *Advanced Cancer*. 2013. p. 97–106.
108. Mogos MF, August EM, Salinas-Miranda AA, Sultan DH, Salihi HM. A Systematic Review of Quality of Life Measures in Pregnant and Postpartum Mothers. *Appl Res Qual Life*. 2013;8(2):219–50.
109. Mousavi SA, Masoumi SZ, Keramat A, Pooralajal J, Shobeiri F, Abbas Mousavi S, et al. Assessment of Questionnaires Measuring Quality of Life in Infertile Couples: A Systematic Review. *J Reprod Infertil*. 2013 Jul;14(3):110–9.
110. Moyle W, Murfield JE. Health-related quality of life in older people with severe dementia: challenges for measurement and management. *Expert Rev Pharmacoeconomics Outcomes Res*. 2013;13(1):109–22.
111. Muzzatti B, Annunziata MA. Assessing quality of life in long-term cancer survivors: a review of available tools. *Support Care Cancer*. 2013;21(11):3143–52.
112. Paltzer J, Barker E, Witt WP. Measuring the health-related quality of life (HRQoL) of young children in resource-limited settings: a review of existing measures. *Qual Life Res*. 2013;22(6):1177–87.
113. Perales J, Cosco TD, Stephan BCM, Haro JM, Brayne C. Health-related quality-of-life instruments for Alzheimer's disease and mixed dementia. *Int Psychogeriatrics*. 2013;25(5):691–706.
114. Pusic AL, Cemal Y, Albornoz C, Klassen A, Cano S, Sulimanoff I, et al. Quality of life among breast cancer patients with lymphedema: A systematic review of patient-reported outcome instruments and outcomes. *J Cancer Surviv*. 2013;7(1):83–92.
115. Roncada C, Mattiello R, Pitrez PM, Sarria EE. Specific instruments to assess quality of life in children and adolescents with asthma. *J Pediatr (Rio J)*. 2013;89(3):217–25.
116. Salek MS, Jung S, Brincat-Ruffini LA, MacFarlane L, Lewis-Jones MS, Basra MKA, et al. Clinical experience and psychometric properties of the Children's Dermatology Life Quality Index (CDLQI), 1995–2012. *Br J Dermatol*. 2013;169(4):734–59.
117. Testart J, Richieri R, Caqueo-Urizar A, Lancon C, Auquier P, Boyer L. Quality of life and other outcome measures in caregivers of patients with schizophrenia. *Expert Rev Pharmacoeconomics Outcomes Res*. 2013;13(5):641–9.
118. Weldam SWM, Schuurmans MJ, Liu R, Lammers JWW. Evaluation of Quality of Life instruments for use in COPD care and research: A systematic review. *Int J Nurs Stud*. 2013;50(5):688–707.
119. Wheelwright S, Darlington A-S, Hopkinson JB, Fitzsimmons D, White A, Johnson CD. A systematic review of health-related quality of life instruments in patients with cancer cachexia. *Support Care Cancer*. 2013;21(9):2625–36.
120. Yang Y, Longworth L, Brazier J. An assessment of validity and responsiveness of generic measures of health-related quality of life in hearing impairment. Vol. 22, *Quality of Life Research*. 2013. p. 2813–28.
121. Anthony SJ, Selkirk E, Sung L, Klaassen RJ, Dix D, Scheinemann K, et al. Considering quality of life for children with cancer: a systematic review of patient-reported outcome measures and the development of a conceptual model. *Qual Life Res*. 2014;23(3):771–89.
122. Aspden T, Bradshaw SA, Playford ED, Riazi A. Quality-of-life measures for use within care homes: A systematic review of their measurement properties. *Age Ageing*. 2014;43(5):596–603.
123. Balioussis C, Hitzig S, Flett H, Noreau L, Craven B. Identifying and Classifying Quality of Life Tools for Assessing Spasticity After Spinal Cord Injury. *Top Spinal Cord Inj Rehabil*. 2014;20(3):208–24.

124. Brazier J, Connell J, Papaioannou D, Mukuria C, Mulhern B, Peasgood T, et al. A systematic review, psychometric analysis and qualitative assessment of generic preference-based measures of health in mental health populations and the estimation of mapping functions from widely used specific measures. *Health Technol Assess (Rockv)*. 2014;18(34):1–188.
125. Chiu L, Chiu N, Chow E, Cella D, Beaumont JL, Lam H, et al. Comparison of Three Shortened Questionnaires for Assessment of Quality of Life in Advanced Cancer. *J Palliat Med*. 2014;17(8):918–23.
126. Chow R, Lao N, Popovic M, Chow E, Cella D, Beaumont J, et al. Comparison of the EORTC QLQ-BN20 and the FACT-Br quality of life questionnaires for patients with primary brain cancers: a literature review. *Support Care Cancer*. 2014;22(9):2593–8.
127. Garin O, Herdman M, Vilagut G, Ferrer M, Ribera A, Rajmil L, et al. Assessing health-related quality of life in patients with heart failure: a systematic, standardized comparison of available measures. *Heart Fail Rev*. 2014;19(3):359–67.
128. Gilchrist F, Rodd H, Deery C, Marshman Z. Assessment of the quality of measures of child oral health-related quality of life. *BMC Oral Health*. 2014;14:40.
129. Grubbs JR, Tolleson-Rinehart S, Huynh K, Davis RM. A review of Quality of Life Measures in Dry Eye Questionnaires. 2014;33(2):215–8.
130. Gupta N, Pinto LM, Morogan A, Bourbeau J. The COPD assessment test: a systematic review. *Eur Respir J*. 2014;44(4):873–84.
131. Hawkins AT, Henry AJ, Crandell DM, Nguyen LL. A systematic review of functional and quality of life assessment after major lower extremity amputation. *Ann Vasc Surg*. 2014;28(3):763–80.
132. Hewison A, Mccaughan D, Watt I. An evaluative review of questionnaires recommended for the assessment of quality of life and symptom severity in women with urinary incontinence. *J Clin Nurs*. 2014;23(21–22):2998–3011.
133. Ikeda E, Hinckson E, Krageloh C. Assessment of quality of life in children and youth with autism spectrum disorder: a critical review. *Qual Life Res*. 2014;23(4):1069–85.
134. Jardine J, Glinianaia S V, McConachie H, Embleton ND, Rankin J. Self-reported quality of life of young children with conditions from early infancy: a systematic review. *Pediatrics*. 2014;134(4):e1129–48.
135. Kuspinar A, Mayo NE. A review of the psychometric properties of generic utility measures in multiple sclerosis. Vol. 32, *Pharmacoeconomics*. Springer; 2014. p. 759–73.
136. Lee J, Kim SH, Moon SH, Lee EH. Measurement properties of rheumatoid arthritis-specific quality-of-life questionnaires: systematic review of the literature. *Qual Life Res*. 2014;23(10):2779–91.
137. Lieu JEC, Chalivendra V, Ead B. Pediatric quality of life in children with otolaryngologic disease: what inventories are available and what is still needed? *Curr Opin Otolaryngol Head Neck Surg*. 2014;22(6):506–20.
138. Longworth L, Yang Y, Young T, Mulhern B, Hernández Alava M, Mukuria C, et al. Use of generic and condition-specific measures of health-related quality of life in NICE decision-making: A systematic review, statistical modelling and survey. *Health Technol Assess (Rockv)*. 2014;18(9):1–224.
139. Makai P, Brouwer WBF, Koopmanschap MA, Stolk EA, Nieboer AP. Quality of life instruments for economic evaluations in health and social care for older people: a systematic review. *Soc Sci Med*. 2014;102:83–93.
140. Niu H-Y, Niu C-Y, Wang J-H, Zhang Y, He P. Health-related quality of life in women with breast cancer: a literature-based review of psychometric properties of breast cancer-specific measures. *Asian Pacific J Cancer Prev*. 2014;15(8):3533–6.
141. Salvilla SA, Dubois AEJ, Flokstra-De Blok BMJ, Panesar SS, Worth A, Patel S, et al. Disease-specific health-related quality of life instruments for IgE-mediated food allergy. *Allergy*. 2014;69(7):834–44.
142. Schmidt S, Garin O, Pardo Y, Valderas JM, Alonso J, Rebollo P, et al. Assessing quality of life in patients with prostate cancer: a systematic and standardized comparison of available instruments. *Qual Life Res*. 2014 Oct;23(8):2169–81.
143. Smith AB, Cocks K, Taylor M, Parry D. Most domains of the European Organisation for Research and Treatment of Cancer Quality of Life Questionnaire C30 are reliable. *J Clin Epidemiol*. 2014;67(8):952–7.
144. Souza JGS, Pamponet MA, Souza TCS, Pereira AR, Souza AGS, Martins AME d. BL. Tools used for evaluation of Brazilian children’s quality of life. *Rev Paul Pediatr*. 2014;32(2):272–8.
145. Swigris JJ, Esser D, Conoscenti CS, Brown KK. The psychometric properties of the St George’s Respiratory Questionnaire (SGRQ) in patients with idiopathic pulmonary fibrosis: a literature review. *Health Qual Life Outcomes*. 2014;12:124.
146. Timmerman AA, Speyer R, Heijnen BJ, Klijn-Zwijenberg IR. Psychometric characteristics of health-related quality-of-life questionnaires in oropharyngeal dysphagia. *Dysphagia*. 2014;29(2):183–98.
147. Watt T, Cramon P, Frenzl DM, Ware JE. Assessing health-related quality of life in patients with benign non-toxic goitre. *Best Pract Res Clin Endocrinol Metab*. 2014;28(4):559–75.
148. Wolpe RE, Toriy AM, da Silveira GF, Cardoso FL, Sperandio FF. Assessing the impact of urinary incontinence on quality of life: systematic review of instruments in Portuguese. *Man Ther Posturology Rehabil J*. 2014;12(1):273–80.
149. Alrubaiy L, Rikaby I, Dodds P, Hutchings HA, Williams JG. Systematic review of health-related quality of life measures for inflammatory bowel disease. *J Crohn’s Colitis*. 2015;9(3):284–92.
150. Aspesberro F, Mangione-Smith R, Zimmerman JJ. Health-related quality of life following pediatric critical illness. *Intensive Care Med*. 2015;41(7):1235–46.
151. Bédard E, Kergoat HH, Kergoat M-J, Leclerc B-S, Bedard E, Kergoat HH, et al. Systematic review of vision-related quality of life questionnaires for older institutionalised seniors with dementia. *Ophthalmic Physiol Opt*. 2015;35(4):377–87.
152. Bowling A, Rowe G, Adams S, Sands P, Samsi K, Crane M, et al. Quality of life in dementia: a systematically conducted narrative review of dementia-specific measurement scales. *Aging Ment Health*. 2015;19(1):13–31.
153. Conijn AP, Jens S, Terwee CB, Breek JC, Koelemay MJW. Assessing the quality of available patient reported outcome measures for intermittent claudication: a systematic review using the COSMIN checklist. *Eur J Vasc Endovasc Surg*. 2015;49(3):316–34.
154. de Climens AR, Tunceli K, Arnould B, Germain N, Igly K, Norquist J, et al. Review of patient-reported outcome instruments measuring health-related quality of life and satisfaction in patients with type 2 diabetes treated with oral therapy. *Curr Med Res Opin*. 2015 Apr;31(4):643–65.



155. Dronavalli M, Thompson SC. A systematic review of measurement tools of health and well-being for evaluating community-based interventions. Vol. 69, *Journal of Epidemiology and Community Health*. 2015. p. 805–15.
156. Hamoen EHH, De Rooij M, Witjes JA, Barentsz JO, Rovers MM. Measuring health-related quality of life in men with prostate cancer: A systematic review of the most used questionnaires and their validity. *Urol Oncol*. 2015;33(2):69.e19-69.e28.
157. Hu H, Luan L, Li S-C. How Quality of Life as Patient-Reported Outcome Has Been Studied for Rheumatoid Arthritis in Chinese-Speaking Population. *Value Heal Reg Issues*. 2015;6:98–102.
158. Janssens A, Rogers M, Gumm R, Jenkinson C, Tennant A, Logan S, et al. Measurement properties of multidimensional patient-reported outcome measures in neurodisability: a systematic review of evaluation studies. *Dev Med Child Neurol*. 2015;58(5):437–51.
159. Launois R. Health-related quality-of-life scales specific for chronic venous disorders of the lower limbs. *J Vasc Surg Venous Lymphat Disord*. 2015;3(2):219-227.e3.
160. Monticone M, Nava C, Leggero V, Rocca B, Salvaderi S, Ferrante S, et al. Measurement properties of translated versions of the Scoliosis Research Society-22 Patient Questionnaire, SRS-22: a systematic review. *Qual Life Res*. 2015;24(8):1981–98.
161. Nguyen J, Popovic M, Chow E, Cella D, Beaumont JL, Chu D, et al. EORTC QLQ-BR23 and FACT-B for the assessment of quality of life in patients with breast cancer: A literature review. *J Comp Eff Res*. 2015;4(2):157–66.
162. Oliveira IS, da Cunha Menezes Costa L, Fagundes FRC, Cabral CMN. Evaluation of cross-cultural adaptation and measurement properties of breast cancer-specific quality-of-life questionnaires: a systematic review. *Qual Life Res*. 2015;24(5):1179–95.
163. Polinder S, Haagsma JA, van Klaveren D, Steyerberg EW, van Beeck EF. Health-related quality of life after TBI: a systematic review of study design, instruments, measurement properties, and outcome. *Popul Health Metr*. 2015;13:4.
164. Taghavi SA, Bazarganipour F, Montazeri A, Kazemnejad A, Chaman R, Khosravi A. Health-related quality of life in polycystic ovary syndrome patients: A systematic review. *Iran J Reprod Med*. 2015;13(8):473–82.
165. Treanor C, Donnelly M. A methodological review of the Short Form Health Survey 36 (SF-36) and its derivatives among breast cancer survivors. *Qual Life Res*. 2015;24(2):339–62.
166. Wong CKH, Chen J, Yu CLY, Sham M, Lam CLK. Systematic review recommends the European Organization for Research and Treatment of Cancer colorectal cancer-specific module for measuring quality of life in colorectal cancer patients. *J Clin Epidemiol*. 2015;68(3):266–78.
167. Algar K, Woods RT, Windle G. Measuring the quality of life and well-being of people with dementia: A review of observational measures. *Dementia*. 2016;15(4):832–57.
168. Bryant AL, Walton A, Shaw-Kokot J, Mayer DK, Reeve BB. A systematic review of psychometric properties of health-related quality-of-life and symptom instruments in adult acute leukemia survivors. *Cancer Nurs*. 2016;39(5):375–82.
169. Coombes LH, Wiseman T, Lucas G, Sangha A, Murtagh FE. Health-related quality-of-life outcome measures in paediatric palliative care: A systematic review of psychometric properties and feasibility of use. *Palliat Med*. 2016;30(10):935–49.
170. Dichter MN, Schwab CGG, Meyer G, Bartholomeyczik S, Halek M. Linguistic validation and reliability properties are weak investigated of most dementia-specific quality of life measurements - A systematic review. *J Clin Epidemiol*. 2016;70:233–45.
171. Ganesh V, Agarwal A, Popovic M, Cella D, McDonald R, Vuong S, et al. Comparison of the FACT-C, EORTC QLQ-CR38, and QLQ-CR29 quality of life questionnaires for patients with colorectal cancer: a literature review. *Support Care Cancer*. 2016;24(8):3661–8.
172. Gutiérrez-Vargas R, Díaz-García ML, Villasis-Keever MÁ, Portilla-Robertson J, Zapata-Tárres M. Instruments to measure the quality of life in patients with oral mucositis undergoing oncological treatment: a systematic review of the literature. *Bol Med Hosp Infant Mex*. 2016;73(6):457–66.
173. Hand C. Measuring health-related quality of life in adults with chronic conditions in primary care settings. *Canadian Family Physician*. *Can Fam Physician*. 2016;62(7):375–83.
174. Heindl D, Prinsen CAC, Deckert S, Chalmers JR, Drucker AM, Ofenloch R, et al. Measurement properties of adult quality-of-life measurement instruments for eczema: a systematic review. *Allergy*. 2016;71(3):358–70.
175. Kotecha D, Ahmed A, Calvert M, Lencioni M, Terwee CB, Lane DA. Patient-Reported Outcomes for Quality of Life Assessment in Atrial Fibrillation: A Systematic Review of Measurement Properties. *PLoS One*. 2016;11(11):e0165790.
176. Lee J, Lee E-H, Moon SH. A systematic review of measurement properties of the instruments measuring health-related quality of life in patients with irritable bowel syndrome. *Qual Life Res*. 2016;25(12):2985–95.
177. Maratia S, Cedillo S, Rejas J. Assessing health-related quality of life in patients with breast cancer: a systematic and standardized comparison of available instruments using the EMPRO tool. *Qual Life Res*. 2016;25(10):2467–80.
178. Mestre TA, van Duijn E, Davis AM, Bachoud-Lévi AC, Busse M, Anderson KE, et al. Rating scales for behavioral symptoms in Huntington's disease: Critique and recommendations. *Mov Disord*. 2016;31(10):1466–78.
179. Spinou A, Fragkos KC, Lee KK, Elston C, Siegert RJ, Loebinger MR, et al. The validity of health-related quality of life questionnaires in bronchiectasis: a systematic review and meta-analysis. *Thorax*. 2016;71(8):683–94.
180. Tapia VJ, Epstein S, Tolmach OS, Hassan AS, Chung NN, Gosman AA. Health-related quality-of-life instruments for pediatric patients with diverse facial deformities: A systematic literature review. *Plast Reconstr Surg*. 2016;138(1):175–87.
181. Wong CKH, Lang BHH, Lam CLK. A systematic review of quality of thyroid-specific health-related quality-of-life instruments recommends ThyPRO for patients with benign thyroid diseases. *J Clin Epidemiol*. 2016;78:63–72.
182. Woo A, Fu T, Popovic M, Chow E, Cella D, Wong CS, et al. Comparison of the EORTC STO-22 and the FACT-Ga quality of life questionnaires for patients with gastric cancer. *Ann Palliat Med*. 2016;5(1):13–21.
183. Ahmadi A, Tohidast SA, Mansuri B, Kamali M, Krishnan G. Acceptability, reliability, and validity of the Stroke and Aphasia Quality of Life Scale-39 (SAQOL-39) across languages: a systematic review. *Clin Rehabil*. 2017;31(9):1201–14.
184. Baghdadli A, Russet F, Mottron L. Measurement properties of screening and diagnostic tools for autism spectrum adults of mean normal intelligence: A systematic review. *Eur Psychiatry*. 2017;44:104–24.
185. Best KL, Ethans K, Craven BC, Noreau L, Hitzig SL. Identifying and classifying quality of life tools for neurogenic bladder function after spinal cord injury: A systematic review. *J Spinal Cord Med*. 2017;40(5):505–29.

186. Chen X-L, Zhong L-H, Wen Y, Liu T-W, Li X-Y, Hou Z-K, et al. Inflammatory bowel disease-specific health-related quality of life instruments: a systematic review of measurement properties. *Health Qual Life Outcomes*. 2017;15(1):177.
187. Frew JW, Davidson M, Murrell DF. Disease-specific health related quality of life patient reported outcome measures in Genodermatoses: a systematic review and critical evaluation. *Orphanet J Rare Dis*. 2017;12(1):189.
188. Heaney A, Stepanous J, Rouse M, McKenna SP. A review of the psychometric properties and use of the rheumatoid arthritis quality of life questionnaire (RaQoL) in clinical research. *Curr Rheumatol Rev*. 2017;13(3):197–205.
189. Heint D, Prinsen CAC, Sach T, Drucker AM, Ofenloch R, Flohr C, et al. Measurement properties of quality-of-life measurement instruments for infants, children and adolescents with eczema: a systematic review. *Br J Dermatol*. 2017;176(4):878–89.
190. Kandel H, Khadka J, Goggin M, Pesudovs K. Patient-reported Outcomes for Assessment of Quality of Life in Refractive Error: A Systematic Review. *Optom Vis Sci*. 2017;94(12):1102–19.
191. Kao SS, Peters MDJ, Ooi EH. Pediatric tonsillectomy quality of life assessment instruments: A scoping review protocol. *Laryngoscope*. 2017;127:2399–406.
192. Khan S, Tangiisuran B, Imtiaz A, Zainal H. Health Status and Quality of Life in Tuberculosis: Systematic Review of Study Design, Instruments, Measuring Properties and Outcomes. *Heal Sci J*. 2017;11(1):1–10.
193. Kwan YH, Fong W, Tan VIC, Lui NL, Malhotra R, Østbye T, et al. A systematic review of quality-of-life domains and items relevant to patients with spondyloarthritis. *Semin Arthritis Rheum*. 2017;47(2):175–82.
194. Limperg PF, Terwee CB, Young NL, Price VE, Gouw SC, Peters M, et al. Health-related quality of life questionnaires in individuals with haemophilia: a systematic review of their measurement properties. *Haemophilia*. 2017;23(4):497–510.
195. Lucendo AJ, Arias-González L, Molina-Infante J, Arias Á. Systematic review: health-related quality of life in children and adults with eosinophilic oesophagitis-instruments for measurement and determinant factors. *Aliment Pharmacol Ther*. 2017;
196. Page TE, Farina N, Brown A, Daley S, Bowling A, Basset T, et al. Instruments measuring the disease-specific quality of life of family carers of people with neurodegenerative diseases: A systematic review. *BMJ Open*. 2017;7(3).
197. Poku E, Aber A, Phillips P, Essat M, Buckley Woods H, Palfreyman S, et al. Systematic review assessing the measurement properties of patient-reported outcomes for venous leg ulcers. *BJS open*. 2017;1(5):138–47.
198. Roydhouse J, Wilson I b. Systematic review of caregiver responses for patient health-related quality of life in adult cancer care. *Qual Life Res*. 2017;68(8):1925–54.
199. Strada L, Vanderplasschen W, Buchholz A, Schulte B, Muller AE, Verthein U, et al. Measuring quality of life in opioid-dependent people: a systematic review of assessment instruments. *Qual Life Res*. 2017;26:3187–200.
200. Sullivan KJ, Hunter Z, Andrioli V, Guerra L, Leonard M, Klassen A, et al. Assessing quality of life of patients with hypospadias: A systematic review of validated patient-reported outcome instruments. *J Pediatr Urol*. 2017;13(1):19–27.
201. Tang TS, Yusuf FLA, Polonsky WH, Fisher L. Assessing quality of life in diabetes: II – Deconstructing measures into a simple framework. *Diabetes Res Clin Pract*. 2017;126:286–302.
202. Tax C, Steenbergen ME, Zusterzeel PLM, Bekkers RLM, Rovers MM. Measuring health-related quality of life in cervical cancer patients: a systematic review of the most used questionnaires and their validity. *BMC Med Res Methodol*. 2017;17(1):15.
203. Xin Y, McIntosh E. Assessment of the construct validity and responsiveness of preference-based quality of life measures in people with Parkinson's: a systematic review. *Qual Life Res*. 2017;26(1):1–23.
204. Aber A, Lumley E, Phillips P, Woods HB, Jones G, Michaels J. Themes that Determine Quality of Life in Patients with Peripheral Arterial Disease: A Systematic Review. *Patient*. 2018;11(5):489–502.
205. Chiarotto A, Terwee CB, Kamper SJ, Boers M, Ostelo RW. Evidence on the measurement properties of health-related quality of life instruments is largely missing in patients with low back pain, a systematic review. *J Clin Epidemiol*. 2018;102:23–7.
206. Cornelissen AJ, Kool M, Keuter XH, Hetus EM, Grzymala AAP de, van der Hulst RR, et al. Concerning Quality of Life Questionnaires in Breast Cancer-Related Lymphedema Patients: Review of the Literature by Cornelissen et al. *Lymphat Res Biol*. 2018;16(2):134–9.
207. de Vries CEE, Kalf MC, Prinsen CAC, Coulman KD, den Haan C, Welbourn R, et al. Recommendations on the most suitable quality-of-life measurement instruments for bariatric and body contouring surgery: a systematic review. *Obes Rev*. 2018;19(10):1395–411.
208. Dow J, Robinson J, Robalino S, Finch T, McColl E, Robinson L. How best to assess quality of life in informal carers of people with dementia; A systematic review of existing outcome measures. *PLoS One*. 2018;13(3).
209. Grobet C, Marks M, Tecklenburg L, Audige L. Application and measurement properties of EQ-5D to measure quality of life in patients with upper extremity orthopaedic disorders: a systematic literature review. *Arch Orthop Trauma Surg*. 2018;138:953–61.
210. Haywood KL, Pearson N, Morrison LJ, Castrén M, Lijja G, Perkins GD. Assessing health-related quality of life (HRQoL) in survivors of out-of-hospital cardiac arrest: A systematic review of patient-reported outcome measures. *Resuscitation*. 2018;123:22–37.
211. Luan L, Hu H, Li S-C. A Review of Studies of Quality of Life for Chinese-Speaking Patients with Ischemic Heart Disease. *Value Heal Reg Issues*. 2018;15:82–90.
212. Mason SJ, Catto JWF, Downing A, Bottomley SE, Glaser AW, Wright P. Evaluating patient-reported outcome measures (PROMs) for bladder cancer: a systematic review using the CConsensus-based Standards for the selection of health Measurement Instruments (COSMIN) checklist. *BJU Int*. 2018;
213. Mohammed MA, Moles RJ, Chen TF. Pharmaceutical care and health related quality of life outcomes over the past 25 years: Have we measured dimensions that really matter? *Int J Clin Pharm*. 2018;40(1):3–14.
214. Mpundu-Kaambwa C, Chen G, Huynh E, Russo R, Ratcliffe J. A review of preference-based measures for the assessment of quality of life in children and adolescents with cerebral palsy. *Qual Life Res*. 2018;27(7):1781–99.
215. Pollo CF, Meneguín S, Miot HA. Evaluation Instruments for Quality of Life Related to Melasma: An Integrative Review. *Clinics*. 2018;73:e65.
216. Tian L, Cao XY. Systematic review of the psychometric properties of disease-specific, quality-of-life questionnaires for patients with hepatobiliary or pancreatic cancers. *Japan J Nurs Sci*. 2018;15(2):99–112.

- 1  
2  
3  
4  
5  
6  
7  
8  
9  
10  
11  
12  
13  
14  
15  
16  
17  
18  
19  
20  
21  
22  
23  
24  
25  
26  
27  
28  
29  
30  
31  
32  
33  
34  
35  
36  
37  
38  
39  
40  
41  
42  
43  
44  
45  
46
217. van Ierssel J, Sveistrup H, Marshall S. Identifying the concepts contained within health-related quality of life outcome measures in concussion research using the International Classification of Functioning, Disability, and Health as a reference: a systematic review. *Qual Life Res.* 2018;27(12):3071–86.
218. van Rooij J, Fransen H, van de Poll-Franse L, Zijlstra M, Raijmakers N. Measuring health-related quality of life in patients with advanced cancer: a systematic review of self-administered measurement instruments. *Qual Life Res.* 2018;27(8):1937–55.
219. Yarlus A, Bayliss M, Cappelleri JC, Maher S, Bushmakina AG, Chen LA, et al. Psychometric validation of the SF-36@Health Survey in ulcerative colitis: results from a systematic literature review. *Qual Life Res.* 2018;27(2):273–90.
220. Yazdani N, Sharif F, Elahi N, Ebadi A, Hosseini SV. Psychometric Properties of Quality of Life Assessment Tools in Morbid Obesity: A Review of Literature. *J Evidence-based Care.* 2018;7(4):7–21.
221. Zaror C, Pardo Y, Espinoza-Espinoza G, Pont A, Munoz-Millan P, Martinez-Zapata MJ, et al. Assessing oral health-related quality of life in children and adolescents: a systematic review and standardized comparison of available instruments. *Clin Oral Investig.* 2018;
222. Hettiarachchi RM, Kularatna S, Byrnes J, Scuffham PA. Pediatric Quality of Life Instruments in Oral Health Research: A Systematic Review. *Value Heal.* 2019;22(1):129–35.
223. Hughes LJ, Farina N, Page TE, Tabet N, Banerjee S. Psychometric properties and feasibility of use of dementia specific quality of life instruments for use in care settings: a systematic review. *Int Psychogeriatrics.* 2019;1–15.
224. Speyer R, Kim JH, Doma K, Chen YW, Denman D, Phyland D, et al. Measurement properties of self-report questionnaires on health-related quality of life and functional health status in dysphonia: a systematic review using the COSMIN taxonomy. *Qual Life Res.* 2019;28(2):283–96.
225. van der Hout A, Neijenhuijs KI, Jansen F, van Uden-Kraan C, Aaronson NK, Groenvold M, et al. Supportive Care in Cancer Measuring Health-Related Quality of Life in Colorectal Cancer Patients : Systematic Review of Measurement Properties of the EORTC QLQ-CR29. *Support Care Cancer.* 2019;
226. Vasconcelos Neto JA, Vasconcelos CTM, Karbage SAL, Farias HDCCAR, Machado SGDM, Saboia DM. Quality of Life in Women with Defecatory Dysfunctions: Systematic Review of Questionnaires Validated in the Portuguese Language. *Rev Bras Ginecol e Obstet.* 2019;41(3):191–8.



## Supplementary File S3. Tools to assess measurement properties.

<sup>1</sup>Consensus-based Standards for the selection of health Measurement Instruments (COSMIN) (2010, 2018)

|                                                         |                                                                                                                                                                                                                                                                                                                                                                                                                |
|---------------------------------------------------------|----------------------------------------------------------------------------------------------------------------------------------------------------------------------------------------------------------------------------------------------------------------------------------------------------------------------------------------------------------------------------------------------------------------|
| 1. Reliability                                          | The degree to which an instrument is free from random error.                                                                                                                                                                                                                                                                                                                                                   |
| 1.1. Internal consistency                               | The degree of the interrelatedness among the items. <i>In COSMIN (2018) internal consistency is derived from internal structure evaluation.</i>                                                                                                                                                                                                                                                                |
| 1.2. Reliability                                        | Scores for patients who have not changed are the same for repeated measurement under several conditions                                                                                                                                                                                                                                                                                                        |
| 1.3. Measurement error                                  | The systematic and random error of a patient's score that is not attributed to true changes in the construct to be measured                                                                                                                                                                                                                                                                                    |
| 2. Validity                                             | The degree to which a Health Related-Patient Reported Outcome (HR-PRO) instrument measures the construct(s) it purports to measure. <i>Concept with major changes in COSMIN (2018) the definition and classification changed to content, structural, cross-cultural validity/measurement invariance, criterion, and hypothesis testing for construct validity (convergent, discriminative or known groups)</i> |
| 2.1. Content (including Face validity)                  | The degree to which the content of an HR-PRO instrument is an adequate reflection of the construct to be measured (or looks as though the items are an adequate reflection)                                                                                                                                                                                                                                    |
| 2.2. Construct (Structural, Hypothesis, Cross-cultural) | The degree to which the scores of an HR-PRO instrument are an adequate reflection of the dimensionality of the construct to be measured. Scores of an HR-PRO instrument are consistent with hypotheses. Performance of the items on a translated or culturally adapted HR-PRO instrument is an adequate reflection of the performance of the items of the original version of the HR-PRO instrument            |
| 2.3. Criterion                                          | The degree to which the scores of an HR-PRO instrument are an adequate reflection of a "gold standard"                                                                                                                                                                                                                                                                                                         |
| 3. Responsiveness                                       | The instrument's ability to detect change over time in the construct to be measured                                                                                                                                                                                                                                                                                                                            |
| 4. Interpretability                                     | The degree to which one can assign easily understood meaning to an instrument's quantitative scores. <i>A complementary attribute, not a measurement property in COSMIN (2018), plus feasibility</i>                                                                                                                                                                                                           |

<sup>2</sup>Quality Criteria for Measurement Properties (Terwee et al. 2007)

|                              |                                                                                                                                                                                                        |
|------------------------------|--------------------------------------------------------------------------------------------------------------------------------------------------------------------------------------------------------|
| 1. Content validity          | The extent to which the domain of interest is comprehensively sampled by the items in the questionnaire                                                                                                |
| 2. Internal consistency      | The extent to which items in a (sub)scale are inter correlated, thus measuring the same construct                                                                                                      |
| 3. Criterion validity        | The extent to which scores on a particular questionnaire relate to a gold standard                                                                                                                     |
| 4. Construct validity        | The extent to which scores on a particular questionnaire relate to other measures in a manner that is consistent with theoretically derived hypotheses concerning the concepts that are being measured |
| 5. Reproducibility           |                                                                                                                                                                                                        |
| 5.1. Agreement               | The extent which the scores on repeated measures are close to each other (absolute measurement error)                                                                                                  |
| 5.2. Reliability             | The extent to which patients can be distinguish from each other (relative measurement error)                                                                                                           |
| 6. Responsiveness            | The ability of a questionnaire to detect clinically important changes over time                                                                                                                        |
| 7. Floor and ceiling effects | The number of respondents who achieved the lowest or highest possible score                                                                                                                            |
| 8. Interpretability          | The degree to which one can assign qualitative meaning to quantitative scores                                                                                                                          |

<sup>3</sup>Attributes and Criteria to assess Health Status and Quality of Life Instruments (1996, 2002)

|                                         |                                                                                                                                                                                                         |
|-----------------------------------------|---------------------------------------------------------------------------------------------------------------------------------------------------------------------------------------------------------|
| 1. Conceptual and measurement model     | The rationale for a description of the concepts and the populations that a measure is intended to assess and the expected relationship between these concepts                                           |
| 2. Reliability                          | The degree to which an instrument is free from random error                                                                                                                                             |
| 2.1. Internal consistency               | The precision of a scale, homogeneity (inter correlations) of items at one point in time                                                                                                                |
| 2.2. Reproducibility                    | Stability of an instrument over time (test-retest) and inter-rater agreement                                                                                                                            |
| 3. Validity                             | The degree to which the instrument measures what it purports to measure.                                                                                                                                |
| 3.1. Content validity                   | The domain of an instrument is appropriate relative to its intended use                                                                                                                                 |
| 3.2. Construct-related validity         | Interpretation of scores based on theoretical implications associated with the construct to be measured                                                                                                 |
| 3.3. Criterion-related validity         | The extent to which scores of the instrument are related to a criterion measure (gold standard).                                                                                                        |
| 4. Responsiveness                       | The instrument's ability to detect change overtime                                                                                                                                                      |
| 5. Interpretability                     | The degree to which one can assign easily understood meaning to an instrument's quantitative scores                                                                                                     |
| 6. Respondent and administrative burden | The time, effort, and other demands placed on those to whom the instrument is administered (respondent burden) or on those who administer the instrument (administrative burden)                        |
| 7. Administration/Accessible forms      | Data collection method, including self-report, interviewer-administered, trained observer rating, computer-assisted interviewer-administered, performance-based measures. Accommodations (e.g. Braille) |
| 8. Cultural and language adaptations    | Assessment of conceptual and linguistic equivalence.                                                                                                                                                    |

<sup>1</sup>Prinsen C, Mokkink L, Bouter L, et al. COSMIN guideline for systematic reviews of Patient-Reported Outcome Measures. *Qual Life Res.* 2018;0(0):1-11. doi:10.1007/s11136-018-1798-3. Mokkink L, Terwee C, Patrick D, et al. The COSMIN study reached international consensus on taxonomy, terminology, and definitions of measurement properties for health-related patient-reported outcomes. *J Clin Epidemiol.* 2010;63(7):737-745. doi:10.1016/j.jclinepi.2010.02.006. <sup>2</sup>Terwee C, Bot S, de Boer M, et al. Quality criteria were proposed for measurement properties of health status questionnaires. *J Clin Epidemiol.* 2007;60(1):34-42. doi:10.1016/j.jclinepi.2006.03.012. <sup>3</sup>Lohr KN, Aaronson NK, Alonso J, Burnam MA, Patrick DL, Perrin EB, et al. Evaluating quality-of-life and health status instruments: Development of scientific review criteria. *Clin Ther.* 1996;18(5):979-92. Aaronson N, Alonso J, Burnam A, et al. Assessing health status and quality-of-life instruments and review criteria. *Qual Life Res.* 2002;11(3):193-215.

## Supplementary File S3. Continue

**<sup>4</sup>Health Status Measures in Economic Evaluation (1999, 2017)**

|      |                                                 |                                                                                                                                                                                             |
|------|-------------------------------------------------|---------------------------------------------------------------------------------------------------------------------------------------------------------------------------------------------|
| 1.   | Practicality                                    | Time to complete the instrument. Response rate. Rate of completion                                                                                                                          |
| 2.   | Reliability                                     | The degree to which an instrument is free from random error                                                                                                                                 |
| 2.1. | Test-retest                                     | Ability to reproduce results over repeated measurements with the minimum amount of random error                                                                                             |
| 2.2. | Inter-rater                                     | Reliability between places of administration                                                                                                                                                |
| 3.   | Validity                                        | Dimensions covered. Items relevant for population. Ability of an instrument to reflect known or expected differences and changes in health to reflect preferences.                          |
| 3.1. | Descriptive validity (Content, Face, Construct) |                                                                                                                                                                                             |
| 3.2. | Valuation                                       | Values used. Main assumptions of the model and how well the preferences of the patients and decision makers are likely to conform to these assumptions.                                     |
| 3.3. | Empirical                                       | Evidence regarding whether or not a measure could generate values which reflect people's preferences using revealed preferences; stated preferences or hypothetical preferences as criteria |

**<sup>5</sup>Guidance for Industry patient-reported outcomes measures (2006, 2009)**

|      |                                                                                                    |                                                                                                                                                                                                                     |
|------|----------------------------------------------------------------------------------------------------|---------------------------------------------------------------------------------------------------------------------------------------------------------------------------------------------------------------------|
| 1.   | Conceptual model                                                                                   | Conceptual framework.                                                                                                                                                                                               |
| 2.   | Administration/Accessible forms                                                                    | Data collection method, including self-report or interviewer, format and scoring. Adaptations for children and adolescents, patients cognitively impaired, or unable to communicate, culture and language subgroups |
| 3.   | Respondent/Administrator Burden                                                                    | Length, formatting, font size, instructions for items, privacy, time, need for physical support in responding.                                                                                                      |
| 4.   | Reliability                                                                                        |                                                                                                                                                                                                                     |
| 4.1. | Test retest                                                                                        | Stability of scores over time when no change has occurred in the concept of interest                                                                                                                                |
| 4.2. | Internal consistency                                                                               | Whether the items in a domain are inter correlated, as evidenced by an internal consistency statistic                                                                                                               |
| 4.3. | Inter interviewer reproducibility                                                                  | Agreement between responses when the PRO is administered by two or more different interviewers                                                                                                                      |
| 5.   | Validity                                                                                           |                                                                                                                                                                                                                     |
| 5.1. | Content validity                                                                                   | Whether items and response options are relevant and are comprehensive measures of the domain or concept                                                                                                             |
| 5.2. | Construct validity (Hypotheses testing, including discriminant, convergent, known groups validity) | Ability to measure the concept. Whether relationships among items, domains, and concepts conform to what is predicted by the conceptual framework for the PRO instrument itself and its validation hypotheses       |
| 6.   | Criterion                                                                                          | Scores of a PRO instrument are related to a known gold standard. When the gold standard is not possible to be evaluated, criterion measure assesses sensitivity specificity, and predictive values                  |
| 7.   | Responsiveness. Ability to detect change                                                           | Evidence that the instrument is equally sensitive to gains and losses in the measurement concept and to change at all points within the entire range expected for the clinical trial population                     |

**<sup>6</sup>Evaluating patient-based outcomes measures for use in clinical trials (1998) (Fitzpatrick's criteria)**

|        |                                        |                                                                                                                                                                                                                 |
|--------|----------------------------------------|-----------------------------------------------------------------------------------------------------------------------------------------------------------------------------------------------------------------|
| 1.     | Reliability                            | The extent to which the instrument is free from random error and may be considered as the amount of a score that is a signal rather than noise                                                                  |
| 1.1.   | Internal consistency                   | The extent to which individual items in a questionnaire scale measure the same construct (homogeneity of items in the scale)                                                                                    |
| 1.2.   | Reproducibility (test retest)          | Whether and instrument yields the same results on repeated applications, when respondents have not changed on the domain being measured. Stability of the questionnaire over time                               |
| 2.     | Validity                               | The extent to which it measures what it purports to measure                                                                                                                                                     |
| 2.1.   | Criterion and Predictive validity      | When a new measure correlates with other measures generally accepted as a more accurate variable. When the new measure correlates with future values of the criterion variable                                  |
| 2.2.   | Face and content validity              | Face validity refers to what an item appears to measure based on its manifest content. Content validity refers to how well a measurement battery covers important parts of the health components to be measured |
| 2.3.   | Construct validity                     | A health status measure is intended to assess a postulated underlying construct.                                                                                                                                |
| 2.3.1. | Convergent validity                    | Correlations are expected to be strongest with the most related constructs                                                                                                                                      |
| 2.3.2. | Discriminant validity                  | Correlations are expected to be weakest with most distally related constructs                                                                                                                                   |
| 2.3.3. | Internal structure                     | A set of assumed relationships between underlying constructs                                                                                                                                                    |
| 2.3.4. | Validity for specific purposes         | Measures need to be assessed for health status, personal preferences and utilities, and social values.                                                                                                          |
| 3.     | Responsiveness (sensitivity to change) | Ability to detect changes over time. Effect size, sensitivity and specificity of scores.                                                                                                                        |
| 4.     | Precision                              | How precise are the distinctions between levels of health and illness (sensitivity). Format categories.                                                                                                         |
| 5.     | Interpretability                       | How meaningful are the scores from an instrument                                                                                                                                                                |
| 6.     | Acceptability                          | Evidence of acceptability is associated with high response rates. Respondent burden.                                                                                                                            |
| 7.     | Cultural applicability                 | Rigorous translation can by itself establish the appropriateness of an instrument                                                                                                                               |
| 8.     | Feasibility                            | Impact of different patient-based outcome measures upon staff and researchers. Administrator burden.                                                                                                            |

**<sup>7</sup>International Classification of Functioning (ICF) & International Classification of Functioning for Children and Youth (ICFCY) (2019)**

|    |                  |                                    |
|----|------------------|------------------------------------|
| 1. | Content validity | Health and Health-related domains. |
|----|------------------|------------------------------------|

<sup>4</sup> Brazier J, Deverill M, Green C, Harper R, Booth A. A review of the use of health status measures in economic evaluation. *Health Technol Assess (Rockv)*. 1999;3(9). Brazier J, Ara R, Rowen D, Chevrou-Severac H. A Review of Generic Preference-Based Measures for Use in Cost-Effectiveness Models. *Pharmacoeconomics*. 2017;35(s1):21-31. doi:10.1007/s40273-017-0545-x. <sup>5</sup>Department of Health and Human Services. Guidance for Industry Patient-Reported Outcome Measures: Use in Medical Product Development to Support Labeling Claims; draft guidance. *Health Qual Life Outcomes*. 2006;20:1-20. doi:10.1186/1477-7525-4-79. Department of Health and Human Services. Guidance for Industry Patient-Reported Outcome Measures: Use in Medical Product Development to Support Labeling Claims.; 2009. doi:10.1111/j.1524-4733.2009.00609.x. <sup>6</sup>Fitzpatrick R, Davey C, Buxton MJ, Jones DR. Evaluating Patient-Based Outcome Measures for Use in Clinical Trials. Vol 2.; 1998. doi:9812244. <sup>7</sup>World Health Organization. International Classification of Functioning (ICF). [www.who.int/classifications/icf/en/](http://www.who.int/classifications/icf/en/).

## Supplementary File S3. Continue

**<sup>8</sup>Evaluating Measures of Patient Reported Outcomes (EMPRO) (2008)**

|    |      |                                                                           |                                                                                                                                                                       |
|----|------|---------------------------------------------------------------------------|-----------------------------------------------------------------------------------------------------------------------------------------------------------------------|
| 1  | 1.   | Conceptual and Measurement model                                          | The rationale for description of the concept and the populations that a measure is intended to assess and the relationship between these concepts                     |
| 2  | 2.   | Reliability                                                               | The degree to which an instrument is free from random error                                                                                                           |
| 3  | 2.1. | Internal consistency                                                      | The precision of a scale, based on the homogeneity of the scale's items at one point in time                                                                          |
| 4  | 2.2. | Reproducibility                                                           | The stability of an instrument over time (test retest) and inter-rater agreement at one point in time                                                                 |
| 5  | 3.   | Validity (including content, criterion, hypotheses testing and construct) | The degree to which the instrument measures what it purports to measure                                                                                               |
| 6  | 4.   | Responsiveness                                                            | The ability to detect change over time                                                                                                                                |
| 7  | 5.   | Interpretability                                                          | The degree to which one can assign meaning to an instrument's quantitative scores                                                                                     |
| 8  | 6.   | Burden (Respondent/Administrator burden)                                  | Time, effort and other demands placed on the administration of the instrument                                                                                         |
| 9  | 7.   | Administration mode                                                       | Data collection method. For each mode of administration, the information about validity, reliability, responsiveness, interpretability and burden should be assessed. |
| 10 | 8.   | Cultural and language adaptations                                         | Methods to achieve linguistic equivalence are adequately described and appropriate. Differences from the original are adequately described and appropriate.           |

**<sup>9</sup>Spinal Cord Injury Criteria (2008, 2016)**

|    |    |                                                                                           |                                                                                                                                                                                                                               |
|----|----|-------------------------------------------------------------------------------------------|-------------------------------------------------------------------------------------------------------------------------------------------------------------------------------------------------------------------------------|
| 11 | 1. | Content                                                                                   | Description. Items. Scale development. Internal structure or subscales                                                                                                                                                        |
| 12 | 2. | Administration/Accessible forms                                                           | Data collection method. Items, time, training, burden of administering. Disability adaptation (e.g. Braille)                                                                                                                  |
| 13 | 3. | Reliability (test retest, internal consistency)                                           | Degree to which an instrument is consistent or free from random error                                                                                                                                                         |
| 14 | 4. | Criterion oriented validity (concurrent, predictive, discriminant, and clinical validity) | Scale predicts other measures of the same construct. Gold standard and/or sensitivity and specificity. Scale distinguish between scores and/ or groups. Clinical utility, also called prescriptive and consequential validity |
| 15 | 5. | Responsiveness, sensitivity to change                                                     | Evidence of change in expected direction using methods such as standardized effect sizes                                                                                                                                      |
| 16 | 6. | Floor and ceiling effects                                                                 | Floor and ceiling issues can determine whether change is detected or obscured by the measure                                                                                                                                  |
| 17 | 7. | Population application (Applicability in SCI groups, languages, norms)                    | Description of use in people with spinal cord injury (vs other people). Information of norms are available. Available in other languages                                                                                      |

**<sup>10</sup>Criteria for Assessing the Tools of Disability Outcomes Research (2000) (Andresen's Tool)**

|    |     |                                                    |                                                                                                          |
|----|-----|----------------------------------------------------|----------------------------------------------------------------------------------------------------------|
| 18 | 1.  | Conceptual model                                   | Relevant domains are completely covered                                                                  |
| 19 | 2.  | Norms, standard values                             | Published data (or public-domain data) are available for both general population and with disabilities   |
| 20 | 3.  | Measurement model                                  | Tool captures the detail and breadth of real differences among persons, includes floor/ceiling effects   |
| 21 | 4.  | Instrument bias                                    | In practical or statistical terms, individual questions (or scores) are biased for the population        |
| 22 | 5.  | Respondent burden                                  | Length and content are acceptable to the intended subjects                                               |
| 23 | 6.  | Administrative burden                              | Ease to administer, score and interpret                                                                  |
| 24 | 7.  | Reliability (test retest and internal consistency) | Instrument gives a consistent answer                                                                     |
| 25 | 8.  | Validity (discriminant, convergent, structure)     | The tool measures what it purports to measure. It distinguish among different levels of mobility         |
| 26 | 9.  | Responsiveness                                     | Instrument is sensitive to changes in interventions                                                      |
| 27 | 10. | Administration/Accessible forms                    | Data collection method, as interviews, self-administration, computer surveys. Adaptations (e.g. Braille) |
| 28 | 11. | Culture/language adaptations                       | Tested versions of the tool for subgroups (including ethnicity, gender, disability)                      |

**<sup>11</sup>CanChild Outcomes Measures (2004)**

|    |      |                      |                                                                                                                                                                                                                                                                                          |
|----|------|----------------------|------------------------------------------------------------------------------------------------------------------------------------------------------------------------------------------------------------------------------------------------------------------------------------------|
| 29 | 1.   | Focus. Purpose       | Focus of measurement (using the International Classification of Functioning Framework, ICF). Rating attributes measured. List the primary purpose for which the scales have been designed (discriminative, predictive, evaluative, etc.). Describe population. Evaluation of the context |
| 30 | 2.   | Clinical utility     | Clarity of instructions, format, time to complete the assessment, administration, scoring and interpretation. Specify whether formal training is required. Cost of the manual and score sheets.                                                                                          |
| 31 | 3.   | Scale construction   | Item selection, weighting, level of measurement                                                                                                                                                                                                                                          |
| 32 | 4.   | Standardization      | Manual (published, specific procedures for administration, scoring) Norms.                                                                                                                                                                                                               |
| 33 | 5.   | Reliability          |                                                                                                                                                                                                                                                                                          |
| 34 | 5.1. | Internal consistency | The degree of homogeneity of test items to the attribute being measured. Measured at one point in time                                                                                                                                                                                   |
| 35 | 5.2. | Intra/Inter observer | Measures variation within an observer; measures variation between two or more observers                                                                                                                                                                                                  |
| 36 | 5.3. | Test retest          | Measures variation in the test over a period of time                                                                                                                                                                                                                                     |
| 37 | 6.   | Validity             |                                                                                                                                                                                                                                                                                          |
| 38 | 6.1. | Content              | The instrument is comprehensive and fully represents the domain of the characteristics it claims to measure                                                                                                                                                                              |
| 39 | 6.2. | Construct            | Measurements of the attribute conform to prior theoretical relationships among characteristics or individuals                                                                                                                                                                            |
| 40 | 6.3. | Criterion            | Measurements obtained by the instrument agree with another more accurate instrument (gold standard)                                                                                                                                                                                      |
| 41 | 6.4. | Responsiveness       | Ability to detect minimal clinically important change over the time                                                                                                                                                                                                                      |

<sup>8</sup>Valderas JM, Ferrer M, Mendivil J, et al. Development of EMPRO: A tool for the standardized assessment of patient-reported outcome measures. *Value Heal*. 2008;11(4):700-708.

doi:10.1111/j.1524-4733.2007.00309.x. <sup>9</sup>Johnston M V., Graves DE. Towards Guidelines for Evaluation of Measures: An Introduction With Application to Spinal Cord Injury. *J Spinal Cord Med*. 2016;31(1):13-26. doi:10.1080/10790268.2008.11753976. *Spinal Cord. Spinal Cord Injury Rehabilitation Evidence*. <https://scireproject.com>. <sup>10</sup>Andresen EM. Criteria for assessing the tools of disability outcomes research. *Arch Phys Med Rehabil*. 2000;81(12 SUPPL. 2):15-20. doi:10.1053/apmr.2000.20619. <sup>11</sup>Law M. Outcome Measures Rating Form Guidelines.; 2004. Available from: <https://www.canchild.ca/system/tenon/assets/attachments/000/000/371/original/measguid.pdf>

## Supplementary File S3. Continue

<sup>12</sup>Outcomes Measures in Rheumatology Clinical Trials (OMERACT) (2019)

|      |                                           |                                                                                                                                                                                                           |
|------|-------------------------------------------|-----------------------------------------------------------------------------------------------------------------------------------------------------------------------------------------------------------|
| 1.   | Truth                                     |                                                                                                                                                                                                           |
| 1.1. | Face validity (credibility)               | Overall appropriateness of the method to be used for evaluation of the outcome, as assessed by the investigators and clinicians                                                                           |
| 1.2. | Content validity (comprehensiveness)      | Ability of the outcome measure to include or predict all those components of health status that are relevant to the intervention being assessed                                                           |
| 1.3. | Criterion validity (accuracy)             | Ability of the outcome measure to reflect the best available estimate of the true clinical status of the patient. Comparison with the "gold standard"                                                     |
| 1.4. | Construct validity (convergent/divergent) | Ability of the outcome measure to match with the hypothesized expectations of the investigator when compared with other indirect assessments                                                              |
| 2.   | Discrimination                            |                                                                                                                                                                                                           |
| 2.1. | Sensitivity to change over time           | Based on calculation of the standardized response mean (SRM) using repeated measures performed in a given population at 2 different time-points without therapeutic intervention                          |
| 2.2. | Discrimination capacity over treatment    | Based on calculation of effect size (ES) in randomized controlled trials or SRM in open-label trials                                                                                                      |
| 2.3. | Reliability (reproducibility)             | Based on evaluation of intra- and interclass correlations                                                                                                                                                 |
| 3.   | Feasibility                               | The measure's ease of use, cost-effectiveness, availability in different centres, and overall usefulness. Practicalities of using the instrument, as cost, burden, length, translations, equipment needs. |

<sup>13</sup>Testing Standards (1999, 2014)

|      |                                                                                                                     |                                                                                                                                                                                                                                                   |
|------|---------------------------------------------------------------------------------------------------------------------|---------------------------------------------------------------------------------------------------------------------------------------------------------------------------------------------------------------------------------------------------|
| 1.   | Evidences of Validity                                                                                               |                                                                                                                                                                                                                                                   |
| 1.1. | Test Content                                                                                                        | Themes, tasks, format of the items, wording, and processes of administration and scoring                                                                                                                                                          |
| 1.2. | Response Processes                                                                                                  | Cognitive processes engaged in by test takers with consequences in the scores.                                                                                                                                                                    |
| 1.3. | Internal Structure<br>(Dimensionality, Differential item functioning)                                               | The degree to which the relationships among test items and components conform to the construct on which the proposed test score interpretations are based including equivalence of scores among different populations.                            |
| 1.4. | Relations to other variables<br>(Convergent, Discriminant, Criterion, nomological network including responsiveness) | The degree to which relationships with other variables are consistent with expectations derived from theory underlying the construct                                                                                                              |
| 1.5. | Consequences of testing                                                                                             | Value judgement about unintended positive and negative consequences of test use                                                                                                                                                                   |
| 2.   | Reliability                                                                                                         | <i>Revised Standard (2014) also includes Decision consistency/accuracy</i>                                                                                                                                                                        |
| 2.1. | Internal consistency, Test- retest, Alternate forms,<br><i>Scorers Consistency, Decision consistency, Accuracy</i>  | The degree to which an instrument is free from random error. The precision of a scale, homogeneity (inter correlations) of items. Replicability of the testing procedure.                                                                         |
| 3.   | Fairness                                                                                                            | Characteristics of all individuals must be considered throughout all stages of development, administration, scoring, interpretation and use of test. <i>Revised Standards (2014) emphasize the role of the Fairness as a measurement property</i> |
| 4.   | Scales, Norms and Score Comparability                                                                               | Reference points should be documented based on population norms and/or expert criteria. Linking procedures devised to guarantee comparability of different measures of similar constructs should be described                                     |
| 5.   | Test development and revision                                                                                       | Tests and their supporting documents should be periodically reviewed. New forms such as those derived from translation to other languages should be thoroughly tested for equivalence                                                             |

<sup>12</sup> OMERACT. Instrument selection for Core Outcome Measurement Sets. In: OMERACT Handbook [Internet]. 2019. Available from: <https://omeracthandbook.org/handbook>. <sup>13</sup> American Educational Research Association, American Psychological Association, National Council on Measurement in Education. Standards for Educational and Psychological Testing. American Educational Research Association.; 1999. American Educational Research Association, American Psychological Association, National Council on Measurement in Education. Standards for Educational and Psychological Testing. American Educational Research Association; 2014.

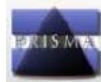

# PRISMA 2009 Checklist

1  
2  
3  
4  
5  
6  
7  
8  
9  
10  
11  
12  
13  
14  
15  
16  
17  
18  
19  
20  
21  
22  
23  
24  
25  
26  
27  
28  
29  
30  
31  
32  
33  
34  
35  
36  
37  
38  
39  
40  
41  
42  
43  
44  
45  
46  
47

| Section/topic                      | #  | Checklist item                                                                                                                                                                                                                                                                                              | Reported on page #  |
|------------------------------------|----|-------------------------------------------------------------------------------------------------------------------------------------------------------------------------------------------------------------------------------------------------------------------------------------------------------------|---------------------|
| <b>TITLE</b>                       |    |                                                                                                                                                                                                                                                                                                             |                     |
| Title                              | 1  | Identify the report as a systematic review, meta-analysis, or both.                                                                                                                                                                                                                                         | Pag 1               |
| <b>ABSTRACT</b>                    |    |                                                                                                                                                                                                                                                                                                             |                     |
| Structured summary                 | 2  | Provide a structured summary including, as applicable: background; objectives; data sources; study eligibility criteria, participants, and interventions; study appraisal and synthesis methods; results; limitations; conclusions and implications of key findings; systematic review registration number. | Pag 2               |
| <b>INTRODUCTION</b>                |    |                                                                                                                                                                                                                                                                                                             |                     |
| Rationale                          | 3  | Describe the rationale for the review in the context of what is already known.                                                                                                                                                                                                                              | Pag 5               |
| Objectives                         | 4  | Provide an explicit statement of questions being addressed with reference to participants, interventions, comparisons, outcomes, and study design (PICOS).                                                                                                                                                  | Pages 5-6           |
| <b>METHODS</b>                     |    |                                                                                                                                                                                                                                                                                                             |                     |
| Protocol and registration          | 5  | Indicate if a review protocol exists, if and where it can be accessed (e.g., Web address), and, if available, provide registration information including registration number.                                                                                                                               | Pag 6               |
| Eligibility criteria               | 6  | Specify study characteristics (e.g., PICOS, length of follow-up) and report characteristics (e.g., years considered, language, publication status) used as criteria for eligibility, giving rationale.                                                                                                      | Pag 6-7             |
| Information sources                | 7  | Describe all information sources (e.g., databases with dates of coverage, contact with study authors to identify additional studies) in the search and date last searched.                                                                                                                                  | Pag 7               |
| Search                             | 8  | Present full electronic search strategy for at least one database, including any limits used, such that it could be repeated.                                                                                                                                                                               | Supplementary File1 |
| Study selection                    | 9  | State the process for selecting studies (i.e., screening, eligibility, included in systematic review, and, if applicable, included in the meta-analysis).                                                                                                                                                   | Pag 6-7             |
| Data collection process            | 10 | Describe method of data extraction from reports (e.g., piloted forms, independently, in duplicate) and any processes for obtaining and confirming data from investigators.                                                                                                                                  | Pag 7               |
| Data items                         | 11 | List and define all variables for which data were sought (e.g., PICOS, funding sources) and any assumptions and simplifications made.                                                                                                                                                                       | Pag 7               |
| Risk of bias in individual studies | 12 | Describe methods used for assessing risk of bias of individual studies (including specification of whether this was done at the study or outcome level), and how this information is to be used in any data synthesis.                                                                                      | No applicable       |
| Summary measures                   | 13 | State the principal summary measures (e.g., risk ratio, difference in means).                                                                                                                                                                                                                               | No applicable       |
| Synthesis of results               | 14 | Describe the methods of handling data and combining results of studies, if done, including measures of consistency (e.g., $I^2$ ) for each meta-analysis.                                                                                                                                                   | No applicable       |



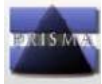

# PRISMA 2009 Checklist

Page 1 of 2

| Section/topic                 | #  | Checklist item                                                                                                                                                                                           | Reported on page #               |
|-------------------------------|----|----------------------------------------------------------------------------------------------------------------------------------------------------------------------------------------------------------|----------------------------------|
| Risk of bias across studies   | 15 | Specify any assessment of risk of bias that may affect the cumulative evidence (e.g., publication bias, selective reporting within studies).                                                             | No applicable                    |
| Additional analyses           | 16 | Describe methods of additional analyses (e.g., sensitivity or subgroup analyses, meta-regression), if done, indicating which were pre-specified.                                                         | No applicable                    |
| <b>RESULTS</b>                |    |                                                                                                                                                                                                          |                                  |
| Study selection               | 17 | Give numbers of studies screened, assessed for eligibility, and included in the review, with reasons for exclusions at each stage, ideally with a flow diagram.                                          | Pag 8 & Fig1(pag. 27)            |
| Study characteristics         | 18 | For each study, present characteristics for which data were extracted (e.g., study size, PICOS, follow-up period) and provide the citations.                                                             | Supplementary File 2             |
| Risk of bias within studies   | 19 | Present data on risk of bias of each study and, if available, any outcome level assessment (see item 12).                                                                                                | No applicable                    |
| Results of individual studies | 20 | For all outcomes considered (benefits or harms), present, for each study: (a) simple summary data for each intervention group (b) effect estimates and confidence intervals, ideally with a forest plot. | No applicable                    |
| Synthesis of results          | 21 | Present results of each meta-analysis done, including confidence intervals and measures of consistency.                                                                                                  | No applicable                    |
| Risk of bias across studies   | 22 | Present results of any assessment of risk of bias across studies (see Item 15).                                                                                                                          | No applicable                    |
| Additional analysis           | 23 | Give results of additional analyses, if done (e.g., sensitivity or subgroup analyses, meta-regression [see Item 16]).                                                                                    | No applicable                    |
| <b>DISCUSSION</b>             |    |                                                                                                                                                                                                          |                                  |
| Summary of evidence           | 24 | Summarize the main findings including the strength of evidence for each main outcome; consider their relevance to key groups (e.g., healthcare providers, users, and policy makers).                     | Pag 13                           |
| Limitations                   | 25 | Discuss limitations at study and outcome level (e.g., risk of bias), and at review-level (e.g., incomplete retrieval of identified research, reporting bias).                                            | Pag 4<br>(Strengths&Limitations) |
| Conclusions                   | 26 | Provide a general interpretation of the results in the context of other evidence, and implications for future research.                                                                                  | Pag 17                           |
| <b>FUNDING</b>                |    |                                                                                                                                                                                                          |                                  |
| Funding                       | 27 | Describe sources of funding for the systematic review and other support (e.g., supply of data); role of funders for the systematic review.                                                               | Pag 1, pag 20                    |

41

42 From: Moher D, Liberati A, Tetzlaff J, Altman DG, The PRISMA Group (2009). Preferred Reporting Items for Systematic Reviews and Meta-Analyses: The PRISMA Statement. PLoS Med 6(6): e1000097.  
 43 doi:10.1371/journal.pmed1000097

44

For more information, visit: [www.prisma-statement.org](http://www.prisma-statement.org).

45

For peer review only - <http://bmjopen.bmj.com/site/about/guidelines.xhtml>

46

47

# BMJ Open

## TOOLS TO ASSESS THE MEASUREMENT PROPERTIES OF QUALITY OF LIFE INSTRUMENTS: A META-REVIEW

|                                 |                                                                                                                                                                                                                                                                                                                                                                                                                                                                                                                                                                                    |
|---------------------------------|------------------------------------------------------------------------------------------------------------------------------------------------------------------------------------------------------------------------------------------------------------------------------------------------------------------------------------------------------------------------------------------------------------------------------------------------------------------------------------------------------------------------------------------------------------------------------------|
| Journal:                        | <i>BMJ Open</i>                                                                                                                                                                                                                                                                                                                                                                                                                                                                                                                                                                    |
| Manuscript ID                   | bmjopen-2019-036038.R1                                                                                                                                                                                                                                                                                                                                                                                                                                                                                                                                                             |
| Article Type:                   | Original research                                                                                                                                                                                                                                                                                                                                                                                                                                                                                                                                                                  |
| Date Submitted by the Author:   | 15-Jun-2020                                                                                                                                                                                                                                                                                                                                                                                                                                                                                                                                                                        |
| Complete List of Authors:       | Lorente, Sonia; Universitat Autònoma de Barcelona, Department of Psychobiology and Methodology of Health Science Area of Behavioral Science Methodology; Consorci Sanitari de Terrassa, Pediatric Area Viladrich, Carme; Universitat Autònoma de Barcelona, Department of Psychobiology and Methodology of Health Science Area of Behavioral Science Methodology<br>Vives, Jaume; Universitat Autònoma de Barcelona, Losilla, Josep-Maria; Universitat Autònoma de Barcelona, Department of Psychobiology and Methodology of Health Science Area of Behavioral Science Methodology |
| <b>Primary Subject Heading</b>: | Qualitative research                                                                                                                                                                                                                                                                                                                                                                                                                                                                                                                                                               |
| Secondary Subject Heading:      | Qualitative research                                                                                                                                                                                                                                                                                                                                                                                                                                                                                                                                                               |
| Keywords:                       | QUALITATIVE RESEARCH, Quality in health care < HEALTH SERVICES ADMINISTRATION & MANAGEMENT, STATISTICS & RESEARCH METHODS                                                                                                                                                                                                                                                                                                                                                                                                                                                          |
|                                 |                                                                                                                                                                                                                                                                                                                                                                                                                                                                                                                                                                                    |

SCHOLARONE™  
Manuscripts



I, the Submitting Author has the right to grant and does grant on behalf of all authors of the Work (as defined in the below author licence), an exclusive licence and/or a non-exclusive licence for contributions from authors who are: i) UK Crown employees; ii) where BMJ has agreed a CC-BY licence shall apply, and/or iii) in accordance with the terms applicable for US Federal Government officers or employees acting as part of their official duties; on a worldwide, perpetual, irrevocable, royalty-free basis to BMJ Publishing Group Ltd ("BMJ") its licensees and where the relevant Journal is co-owned by BMJ to the co-owners of the Journal, to publish the Work in this journal and any other BMJ products and to exploit all rights, as set out in our [licence](#).

The Submitting Author accepts and understands that any supply made under these terms is made by BMJ to the Submitting Author unless you are acting as an employee on behalf of your employer or a postgraduate student of an affiliated institution which is paying any applicable article publishing charge ("APC") for Open Access articles. Where the Submitting Author wishes to make the Work available on an Open Access basis (and intends to pay the relevant APC), the terms of reuse of such Open Access shall be governed by a Creative Commons licence – details of these licences and which [Creative Commons](#) licence will apply to this Work are set out in our licence referred to above.

Other than as permitted in any relevant BMJ Author's Self Archiving Policies, I confirm this Work has not been accepted for publication elsewhere, is not being considered for publication elsewhere and does not duplicate material already published. I confirm all authors consent to publication of this Work and authorise the granting of this licence.



## TOOLS TO ASSESS HRQOL MEASUREMENT PROPERTIES

1

TOOLS TO ASSESS THE MEASUREMENT PROPERTIES OF QUALITY OF LIFE  
INSTRUMENTS: A META-REVIEW

Sonia LORENTE, Carme VILADRICH, Jaume VIVES, Josep-Maria LOSILLA

Universitat Autònoma de Barcelona

Sonia LORENTE, PhD Student, Adjunct Lecturer, Department of Psychobiology and Methodology of Health Science, Universitat Autònoma de Barcelona, UAB; Paediatric nurse, PNP, Hospital de Terrassa, Consorci Sanitari de Terrassa, Sonia.Lorente@uab.cat; Carme VILADRICH, PhD, Associate Professor, Department of Psychobiology and Methodology of Health Science, Universitat Autònoma de Barcelona, UAB, Carme.Viladrich@uab.cat; Jaume VIVES, PhD, Associate Professor, Department of Psychobiology and Methodology of Health Science, Universitat Autònoma de Barcelona, UAB, Jaume.Vives@uab.cat; Josep-Maria LOSILLA, PhD, Associate Professor, Department of Psychobiology and Methodology of Health Science, Universitat Autònoma de Barcelona, UAB, JosepMaria.Losilla@uab.cat

The authors declare no conflict of interest. This work is supported by the Grant PGC2018-100675-B-I00, Spanish Ministry of Science, Innovation and Universities (Spain). Correspondence concerning this article should be addressed to Jaume Vives, Department of Psychobiology and Methodology of Health Science, Universitat Autònoma de Barcelona, UAB. E-mail: [Jaume.Vives@uab.cat](mailto:Jaume.Vives@uab.cat)

**ABSTRACT**

**Objective:** This meta-review aims to discuss the methodological, research and practical applications of tools that assess the measurement properties of instruments evaluating Health-Related Quality of Life (HRQoL) that have been reported in systematic reviews. **Design:** Meta-review. **Methods:** Electronic search from January 2008 to May 2020 was carried out on PubMed, CINAHL, PsycINFO, SCOPUS, WoS, Consensus-based Standards for the selection of health Measurement Instruments (COSMIN) database, Google Scholar, and ProQuest Dissertations & Theses. **Results:** A total of 246 systematic reviews were assessed. Concerning the quality of the review process, some methodological shortcomings were found, such as poor compliance with reporting or methodological guidelines. Regarding the procedures to assess the quality of measurement properties, 164 (66.6 %) of reviewers applied one tool at least. Tool format and structure differed across standards or scientific traditions (i.e. psychology, medicine and economics), but most assess both measurement properties and the usability of instruments. As far as the results and conclusions of systematic reviews are concerned, only 68 (27.5 %) linked the intended use of the instrument to specific measurement properties (e.g. evaluative use to responsiveness). **Conclusions:** The reporting and methodological quality of reviews have increased over time, but there is still room for improvement regarding adherence to guidelines. The COSMIN would be the most widespread and comprehensive tool to assess both the risk of bias of primary studies, and the measurement properties of HRQoL instruments for evaluative purposes. Our analysis of other assessment tools and measurement standards can serve as a starting point for future lines of work on the COSMIN tool, such as considering a more comprehensive evaluation of feasibility, including burden and fairness; expanding its scope for measurement instruments with a different use than evaluative; and improving its assessment of the risk of bias of primary studies. **PROSPERO number:** CRD42017065232. **Key words:** Meta-review,

## TOOLS TO ASSESS HRQOL MEASUREMENT PROPERTIES

3

Quality of life, Health instruments, Measurement properties, Measurement standards,  
HRQoL.

For peer review only

**STRENGTHS AND LIMITATIONS**

- The search strategy has been designed to be comprehensive, following the Peer Review of Electronic Search Strategies (PRESS) guidelines including specific filters for finding studies on psychometric properties of measurement instruments.
- A total of 246 systematic reviews were included and, to our knowledge, this meta-review provides the broadest overview of the most common tools used to assess measurement properties of HRQoL instruments and their relationship with measurement standards, scientific traditions and the intended use of the measures.
- Some of the included systematic reviews poorly reported the review process, outcomes, and conclusions, and this fact may have led to the loss of some data.
- Inclusion of studies published in English only may have led to language bias.

## INTRODUCTION

The systematic reviews of measurement properties critically appraise the content and measurement properties of all instruments that assess a certain construct of interest in a specific study population<sup>1</sup>. These systematic reviews provide both a comprehensive overview of the measurement properties of health instruments and supportive evidence for the selection of instruments for a specific purpose (e.g. research, clinical practice, predictive)<sup>2,3</sup>. In this type of systematic review, different authors have evaluated not only the methodological quality of their key phases, -namely the search strategy, the bias risk assessment of the primary studies and the data synthesis- but also whether the measurement properties of the health status instruments have been appraised with standardized procedures or tools during the data extraction phase<sup>1,2,4,5</sup>. However, depending on the measurement standards upon which these tools were developed, the approach to analyse the measurement properties of instruments may vary.<sup>6</sup> This could lead to different conclusions and recommendations, in spite of the effort undertaken by the international Society for Quality of Life Research to set consensus-based minimum standards<sup>7</sup>. Besides, according to Rosenkoetter and Tate<sup>6</sup>, the assessment tools commonly used by clinicians and researchers to select the appropriate outcome measures for specific purposes show a variety of forms and cover a mix of standards related to reporting, methodological quality and statistical outcome quality.

The aims of this present meta-review are to: 1) identify systematic reviews assessing the measurement properties of HRQoL instruments; 2) identify the main tools applied to assess their measurement properties; 3) describe the contents of the applied tools (validity, reliability, feasibility, etc.); 4) identify the measurement standards upon which these tools were developed or conform to, comparing their similarities and differences, and 5) appraise how authors of these systematic reviews include the assessment of the measurement quality in their results and conclusions, i.e., to what extent conclusions depend on the results of the

## TOOLS TO ASSESS HRQOL MEASUREMENT PROPERTIES

6

1  
2  
3 evaluation of the measurement properties, as well as their relationship, if any, with the  
4  
5 intended use of the HRQoL instrument (e.g. evaluative).  
6  
7

**METHODS**

8  
9  
10 The protocol of this review<sup>8</sup> was prospectively registered. We conducted this meta-review  
11  
12 following the Preferred Reporting Items for Systematic Reviews and Meta-Analysis  
13  
14 Guidelines (PRISMA)<sup>9,10</sup>.  
15  
16

**Search strategy**

17  
18  
19 A systematic search was performed in PubMed, US National Library of Medicine, by  
20  
21 National Center for Biotechnology Information (NCBI); CINAHL, Cumulative Index to  
22  
23 Nursing and Allied Health Literature, by EBSCOhost; PsycINFO, Psychological Information,  
24  
25 by APA PsycNET; SCOPUS by Elsevier; WoS ,Web of Science CORE, by Thomson  
26  
27 Reuters; Consensus-based Standards for the selection of Health Measurement Instruments  
28  
29 database, by COSMIN Initiative (<http://www.cosmin.nl/>); and Google Scholar (up to 400  
30  
31 links). ProQuest Dissertations & Theses Global was used for searching grey literature, and  
32  
33 search alerts in all databases were set. The search strategy followed the Peer Review of  
34  
35 Electronic Search Strategies (PRESS) guidelines recommendations<sup>11,12</sup>, and consisted of 3  
36  
37 filters composed of search terms for the following: (1) systematic review methodology; (2)  
38  
39 HRQoL instruments; and (3) measurement properties. The latter filter was developed by the  
40  
41 Vrije University Medical Center for finding studies on measurement properties of  
42  
43 measurement instruments<sup>13</sup>. All filters were adapted for all databases. The searches were  
44  
45 completed in May 2020. Restrictions by language (English) and publication date (from  
46  
47 January 2008) were applied. (See Supplementary File S1 for search strings for all databases).  
48  
49  
50  
51  
52  
53  
54  
55  
56  
57  
58  
59  
60

### **Inclusion criteria**

Systematic reviews specifically aiming to report or to assess the measurement properties of instruments evaluating the quality of life within the context of health and disease<sup>14</sup> were included. Systematic reviews were required to include the full results report, and detailed information about the procedures used to assess the measurement properties.

### **Exclusion criteria**

Systematic reviews exclusively focused on evaluating clinical interventions were excluded. Systematic reviews specifically focused on assessing Patient-reported outcomes measures (PROMs) other than HRQoL for specific diseases, clinical conditions or populations, were excluded. Systematic reviews that did not report full information about the procedures to assess the measurement properties were also excluded (e.g. conference abstracts).

### **Study screening**

References identified by the search strategy were entered to Mendeley reference management software, and duplicates were removed. Titles and abstracts were screened independently by two reviewers (SL and JV). When decisions were unable to be made from title and abstract alone, the full paper was retrieved. Full-text inclusion criteria were checked independently by two reviewers (SL and JV). Discrepancies during the process were resolved through discussion (with independent reviews of JML and CV when necessary).

### **Data extraction**

Extracted information of each selected systematic review and meta-analysis included general information such as author, year, and quality of review process of systematic reviews (e.g. protocol registration, reporting guidelines, and use of flowchart). Information concerning the main identified tools applied to assess the measurement properties of HRQoL instruments included the title, intended use, number of items, response categories, instrument assessment



## TOOLS TO ASSESS HRQOL MEASUREMENT PROPERTIES

8

criteria, and measurement properties assessed. Information on how authors included the assessment of the quality of HRQoL in their results and conclusions was also extracted.

Authors of eligible studies were contacted to provide missing or additional data when necessary.

**Study aim**

To examine the methodological, research and practical applications of the reported tools in systematic reviews that assess the measurement properties of instruments evaluating quality of life within the context of health and disease, i.e. HRQoL.

**RESULTS****Search results**

Figure 1 shows the results of the search strategy, reported according to the PRISMA flow diagram. A total of 4320 references were identified through database searches. After removing duplicates, 3055 titles and abstracts were screened. After the assessment of 525 full-text documents for eligibility, a total of 246 systematic reviews were included in the qualitative analysis. These systematic reviews covered a wide range of HRQoL instruments, both generic and disease-specific. A total of 24 (9.8 %) of the systematic reviews assessed the quality of one measurement property only, such as the conceptual and measurement model or the content validity (See Supplementary File 2 for characteristics and references of studies).

-----Insert Figure 1 here or near here-----

**Reporting and methodological quality of the studies**

Table 1 shows the reporting and methodological quality of systematic reviews. Findings showed that 27 (10.9 %) of the reports registered the protocol prospectively, a figure that raised to 20.8 % when considering the reports from 2014 onwards; 78 (31.7 %) followed reporting guidelines such as PRISMA (50.8 % the last six years); 42 (17.0 % since 2008; 23.8 % for the last six years) assessed the reporting and/or the methodological quality of primary

## TOOLS TO ASSESS HRQOL MEASUREMENT PROPERTIES

9

1  
2  
3 studies using recommended guides, such as Standards for the Reporting of Diagnostic  
4 Accuracy Studies (STARD) and Quality Assessment of Diagnostic Accuracy Studies  
5 (QUADAS), respectively; 238 (96.7 %) reported the search strategy; 116 (47.41%) reported  
6 the detailed syntax for one database at least; 134 (54.4 %) made the article selection by two  
7 or more independent reviewers; 166 (67.5 %) used a flowchart to report search outcomes, and  
8 132 (53.7 %) stated the funding. These last percentages slightly increased when reducing the  
9 time frame to the last six years.

10  
11  
12  
13  
14  
15  
16  
17  
18  
19  
20 -----Insert Table 1 here or near here-----

**Assessment of measurement properties of HRQoL instruments**

21  
22  
23 Assessment procedures of measurement properties varied considerably. A total of 164 (66.6  
24 %) out of 246 systematic reviews applied one tool at least, that is, a published and well  
25 accepted list of criteria, to rate the evidence on measurement properties of instruments; 41  
26 (16.6 %) applied their own author's criteria only; 30 (12.2 %) followed literature  
27 recommendations included in very highly circulated books or papers only, and 14 (5.7 %)  
28 used an *ad hoc* checklist of criteria only. A total of 98 (39.8 %) systematic reviews did  
29 combine different procedures. Most usual combinations were the use of two tools or one tool  
30 and literature recommendations.

*Tools to assess measurement properties of HRQoL instruments*

31  
32  
33  
34  
35  
36  
37  
38  
39  
40  
41  
42  
43  
44  
45  
46  
47  
48  
49  
50  
51  
52  
53  
54  
55  
56  
57  
58  
59  
60  
The first twelve columns of Table 2 present the characteristics for the identified tools used to  
assess measurement properties using the last update we are aware of. Tools are reported in  
order of frequency of use, as pointed out in the last row of the table: 1) "Consensus-based  
Standards for the selection of Health Measurement INstruments (COSMIN)", COSMIN  
initiative<sup>15,16</sup>; 2) "Quality Criteria for Measurement Properties", Terwee et al.<sup>17</sup>; 3)  
"Attributes and Criteria to assess Health Status and Quality of Life Instruments", Scientific  
Advisory Committee Medical Outcomes Trust (SACMOT)<sup>18,19</sup>; 4) "Health Status Measures

## TOOLS TO ASSESS HRQOL MEASUREMENT PROPERTIES

10

1  
2  
3 in Economic Evaluation”, Brazier et al.<sup>20,21</sup>; 5) “Guidance for Industry Patient-reported  
4 Outcomes Measures”, Food and Drug Administration (FDA)<sup>22,23</sup>; 6) “Evaluating Patient-  
5 based Outcomes Measures for use in clinical trials”, Fitzpatrick et al.<sup>24</sup> (also known as  
6 Fitzpatrick’s criteria); 7) “International Classification of Functioning” and “International  
7 Classification of Functioning for Children and Youth”, World Health Organization<sup>25</sup>; 8)  
8 “Evaluating Measures of Patient Reported Outcomes (EMPRO)”, Spanish Cooperative  
9 Investigation Network for Health and Health Service Outcomes Research (IRYSS)<sup>26</sup>; 9)  
10 “Spinal Cord Injury Criteria”, Spinal Cord Injury Rehabilitation Evidence (SCIRE)<sup>27,28</sup>; 10)  
11 “Criteria for Assessing the Tools of Disability Outcomes Research”, Andresen<sup>29</sup> (also known  
12 as Andresen’s tool); 11) “CanChild Outcomes Measures”, CanChild Center for Childhood  
13 Disability Research<sup>30</sup>; and 12) “Outcomes Measures in Rheumatology Clinical Trials  
14 (OMERACT)”, OMERACT initiative<sup>31</sup>. Table 2 also includes a final column showing the  
15 characteristics of Testing Standards by American Educational Research Association (AERA),  
16 American Psychological Association (APA) and National Council on Measurement in  
17 Education (NCME)<sup>32,33</sup> (hereinafter “Testing Standards”) initially published in 1954 and  
18 regularly updated every decade using consensus based procedures. The Testing Standards are  
19 the source of most of the technical vocabulary for measurement properties in HRQoL  
20 instruments, therefore they will be used as a reference to compare the twelve identified tools.  
21 In fact, these standards have already been recommended to establish a unified approach to  
22 validity and reliability of results derived from psychometric instruments in clinical medicine,  
23 research and education<sup>34</sup>.

24  
25  
26  
27  
28  
29  
30  
31  
32  
33  
34  
35  
36  
37  
38  
39  
40  
41  
42  
43  
44  
45  
46  
47  
48  
49  
50  
51 Different methodologies were used to develop the tools. The expert panel consensus and the  
52 literature review were the most usual methods, led by Steering Committees or Staff/Working  
53 Groups. The format and structure of these tools also vary. Whereas seven of them were  
54 itemized to allow the assignment of quality scores, the other six took the form of standards or  
55  
56  
57  
58  
59  
60

## TOOLS TO ASSESS HRQOL MEASUREMENT PROPERTIES

11

1  
2  
3 guidelines. Tools with an itemized structure were the COSMIN, Quality Criteria for  
4 Measurement Properties, EMPRO, SCI Criteria, Criteria for Assessing the Tools of Disability  
5 Outcomes Research (Andresen's tool), CanChild Outcomes Measures, and OMERACT.  
6  
7 Among all measurement properties considered in Testing Standards, eleven out of the twelve  
8 tools recommended to assess the conceptual and measurement model; content, structural,  
9  
10 convergent, discriminant, concurrent and predictive validity; responsiveness or sensitivity to  
11 change; and internal consistency, test-retest and inter-rater reliability. However, the approach  
12 to analyse these measurement properties varied, with examples found in construct validity,  
13 criterion validity and reliability. Depending on the tool, the validity of the construct can be  
14 evaluated either by hypothesis confirmation in general (e.g. COSMIN or EMPRO), or by  
15 specific hypothesis based on correlations with other measures, i.e. convergent and  
16 discriminant validity (e.g. Andresen's tool). Criterion validity can be assessed either  
17 exclusively by calculating the correlation coefficient with a gold standard (e.g. CanChild  
18 Outcomes Measures) or by obtaining variously correlation, specificity and sensitivity, or  
19 predictive values (e.g. FDA). Reliability can be analysed either by test retest reliability, inter-  
20 rater reliability and internal consistency (e.g. FDA), or only by test retest and inter-rater  
21 agreement (e.g. Economic evaluation). Despite the Testing Standards recommendations, just  
22 one tool includes additional criteria to assess consequential validity (SCI), and four assess  
23 fairness (e.g. accessible forms for subjects with vision impairment, or for specific  
24 populations) (SACMOT, FDA, SCI and Andresen's tool). None of them includes criteria to  
25 assess the validity of response processes. Other HRQoL instrument characteristics, such as  
26 feasibility (e.g. cost of obtaining a sample), acceptability (e.g. suitability from the patient  
27 perspective), or burden (e.g. the time or effort placed on the administration of the instrument)  
28 are assessed instead. Finally, notice that some concepts have changed their place over time.  
29  
30 The clearest case is evidence regarding cross-cultural equivalence, which was treated as an  
31  
32  
33  
34  
35  
36  
37  
38  
39  
40  
41  
42  
43  
44  
45  
46  
47  
48  
49  
50  
51  
52  
53  
54  
55  
56  
57  
58  
59  
60

1  
2  
3 additional characteristic of the instruments in most tools released before 2014 (e.g., EMPRO  
4 or SCI), but was considered a proper measurement property in the COSMIN's 2018 update. It  
5  
6 is also considered a measurement property in Testing Standards where it is included as a  
7  
8 particular case of differential item functioning when assessing the internal structure of the  
9  
10 instruments (See Supplementary File S3 for more details).  
11  
12  
13

14  
15 -----Insert Table 2 here or near here-----  
16

### 17 **Intended uses of instruments and their association to measurement properties**

18  
19 Some of the differences between tools can be attributed to the fact that they are devoted to the  
20  
21 evaluation of instruments developed with different intended uses. For instance, COSMIN  
22  
23 aims at assessing the quality of instruments for an evaluative purpose whereas the Economic  
24  
25 Evaluation tool aims at the assessment of instruments for analytical purposes. Nevertheless,  
26  
27 the relation between the intended use of the instruments and the measurement properties  
28  
29 assessed is not usually included in the conclusions of the systematic reviews. Table 3 shows  
30  
31 the intended use of instruments, based on the framework proposed by McDowell et al.<sup>35</sup>, and  
32  
33 the association to measurement properties that reviewers established in their conclusions. The  
34  
35 instruments were most frequently used for evaluation (178, 72.3 %) and for assessment of  
36  
37 impact of disease on HRQoL (138, 55.1 %), either alone or in conjunction. Other purposes  
38  
39 were analytic (35, 14.2 %), diagnostic (16, 6.5 %), descriptive (4, 1.6 %), and predictive (2,  
40  
41 0.8 %). A total of 6 (2.4 %) systematic reviews did not report or did not clearly state the  
42  
43 intended use of the instruments. As far as the assessment and conclusions is concerned, only  
44  
45 68 (27.6 %) systematic reviews linked the intended use of the instrument to measurement  
46  
47 properties. The most common use was evaluative, generally associated to responsiveness,  
48  
49 content validity or reliability, for example. When the purpose was the assessment of the  
50  
51 impact of disease on HRQoL, the conceptual and measurement model and content validity  
52  
53 were usually reported. The analytic purpose involved reporting preference-based valuation  
54  
55  
56  
57  
58  
59  
60

(e.g. utility scores) and evidence of agreement, and the diagnostic use was linked to known groups validity and test-retest reliability. To better understand these results, some examples are given. First, the evaluative purpose was associated to responsiveness, we found conclusions such as: “For use in longitudinal studies or clinical practice, where responsiveness is an issue, the Minnesota Living with Heart Failure Questionnaire (MLHFQ) and the Chronic Heart Failure Questionnaire (CFHQ) would be adequate”<sup>36</sup>. Second, the intended use was the assessment of the impact of disease on HRQoL, the usual association was to the measurement model and conclusions resembled this one: “None of the RLS specific QOL measures appears to have been informed by a conceptual model or a conceptual framework. Consequently, none can be considered comprehensive in terms of assessing the full impact of Rest Legs Syndrome on QOL”<sup>37</sup>. Third, an example illustrating general conclusions, i.e. conclusions that did not associate the intended use of the instrument to any specific measurement properties, was as follows: “None of the available instruments fulfils the psychometric demands of reliability, validity and responsiveness to serve as a primary outcome measure in clinical trials”<sup>38</sup>

## **Discussion**

The present meta-review identified 246 systematic reviews assessing measurement properties of HRQoL instruments in order to analyse the quality of the review process, describe the most used tools to assess measurement properties and examine how reviewers included the assessment of the quality of HRQoL in their conclusions.

### **Reporting and methodological quality of the studies**

Findings showed how the reporting and methodological quality of systematic reviews has increased over time. Most reviewers reported the search strategy, stated the inclusion and exclusion criteria taking the judgement of two or more independent reviewers into account and used a flow chart to report search outcomes. However, some crucial methodological

1  
2  
3 shortcomings were found. Practices such as registration of the protocol, reporting the detailed  
4  
5 search syntax for one database at least, adherence to reporting guidelines, and assessing the  
6  
7 reporting and the methodological quality of primary studies were quite sparse even in recent  
8  
9 years. As Pussegoda et al.<sup>4</sup> suggested, this fact may be related to the perceived time-  
10  
11 consuming task of using guidelines or to the lack of information about the most appropriate  
12  
13 tool. According to our data, there is still large room for improvement in the assessment of the  
14  
15 methodological quality of included studies in order to attend to Terwee et al.'s warning<sup>2</sup> of  
16  
17 avoiding the risk of presenting biased results, leading to underestimation or overestimation of  
18  
19 the quality of an instrument.  
20  
21  
22

### 23 **Assessment of measurement properties of HRQoL instruments**

24  
25 Assessment procedures of measurement properties of HRQoL instruments were diverse.  
26  
27 Most of the reviewers used at least one tool. Nevertheless, there were reviewers that applied  
28  
29 their own criteria, followed literature recommendations or applied different *ad hoc* devised  
30  
31 checklists. The use of such diverse procedures is noticeable, even in recent years, when well-  
32  
33 accepted tools to assess measurement properties are available.  
34  
35  
36

37  
38 Our meta-review identified up to twelve tools. Seven of them had an itemized structure,  
39  
40 offering a comparable approach to rate the evidence on measurement properties. Length and  
41  
42 scoring differed, but also the instrument assessment criteria. Actually, depending on the tool  
43  
44 used, the approach to assess properties varied greatly, with potentially serious consequences.  
45  
46 The fact that a single measurement property is or isn't required can change the status of  
47  
48 quality of the evidence supporting the same measurement instrument. The variety of forms  
49  
50 found were in concordance to results from related research, which also highlighted the  
51  
52 complexity with regard to definitions of measurement properties<sup>6</sup>. This complexity is also  
53  
54 reflected in the search filter developed by the COSMIN initiative<sup>13</sup>. They recommend using 3  
55  
56 filters that sum up more than 100 search terms in order to get sensible and specific results. In  
57  
58  
59  
60



## TOOLS TO ASSESS HRQOL MEASUREMENT PROPERTIES

15

1  
2  
3 addition, and also depending on the tool used, other characteristics, such as feasibility,  
4  
5 acceptability, and burden were assessed. In spite of the diversity, a shared conclusion can be  
6  
7 stated as follows: because these instruments are to be used in the daily practice, their usability  
8  
9 should be always balanced with other characteristics considered as proper measurement  
10  
11 properties<sup>39,40</sup>. For instance, an instrument needs to be long enough to ensure reliability and  
12  
13 construct validity, but short enough to ensure the adequate response rate and sample size.  
14  
15

16  
17 Otherwise the instrument intended use and sustainability will be at hazard<sup>39</sup>.

18  
19 The differences between tools and their potentially serious consequences on the assessment  
20  
21 of the quality of the primary studies may be better addressed in the light of three  
22  
23 considerations: the date of publication, the main scientific tradition involved when  
24  
25 developing the tools, and the intended uses of the instruments under assessment. Some  
26  
27 differences can be simply explained by the date of publication of the tools. As an example,  
28  
29 where older tools require specific forms of validity evidence related to external variables such  
30  
31 as convergent and discriminant validity, recent tools incorporate the more general view of  
32  
33 hypothesis testing. That is, when developing a new use for an instrument, hypotheses should  
34  
35 be made regarding the expected relations with other relevant variables in their nomological  
36  
37 network and these hypotheses and no other should be tested<sup>32</sup>. Regarding the scientific  
38  
39 traditions, the assessment of outcomes is a constitutive part of the disciplines of Education  
40  
41 and Psychology where the Testing Standards come from. In these contexts, participation is  
42  
43 taken for granted as assessment practices result in high stakes decisions such as, for instance,  
44  
45 certification or personnel selection. The main concern regarding integrity of the instrument  
46  
47 purpose is its fakeability, which could distort the decision-making process, and this would  
48  
49 explain the interest in response processes in this field<sup>41,42</sup>. By contrast, the main objective in  
50  
51 the discipline of Medicine is to provide health care services. Evaluation of subjective views  
52  
53 of patients was a late addition related to the inclusion of HRQoL in the accounting of health  
54  
55  
56  
57  
58  
59  
60

1  
2  
3 care outcomes, despite the instruments assessing the patient experience should be acceptable  
4  
5 to both patients and clinicians, as Beattie et al. (2014) highlighted<sup>39</sup>. Specifically, in the  
6  
7 context of disability research, the administrative and respondent burden requires additional  
8  
9 consideration. The administrative burden may include the need for a Sign Language  
10  
11 interpreter, and the respondent burden includes the length of the questionnaire, which is  
12  
13 especially relevant when using HRQoL instruments with cognitively impaired subjects<sup>29</sup>.  
14  
15 Balancing the traditional psychometric criteria, the practicalities of the instruments and  
16  
17 patient preferences is a generic recommendation for health research, but becomes a special  
18  
19 obligation for research with people with specific needs<sup>29</sup>. Moreover, devising test  
20  
21 accommodations or accessible forms when needed is expected to become a required  
22  
23 psychometric criterion in the near future, given that it has already been included under the  
24  
25 title “fairness in testing” as a new section next to validity and reliability in the chapter of  
26  
27 measurement foundations in the most recent update of Testing Standards<sup>32</sup>.  
28  
29 Another criterion is that of Economic evaluation, traditionally embedded in providing  
30  
31 quantitative judgments able to be integrated into mathematical models such as those used in  
32  
33 calculating quality-adjusted life years (QALYs) and using preference-based methods to  
34  
35 obtain their data. Due to that, some very popular measurement properties such as internal  
36  
37 structure based on factor analysis are not relevant and thus not considered in their tools. In  
38  
39 this tradition the main concerns regarding the integrity of the instrument purpose is whose  
40  
41 values should be considered when determining preferences and how well the preferences of  
42  
43 patients and decision makers are likely to conform to the main assumptions of the utility  
44  
45 models<sup>20,21</sup>.  
46  
47  
48  
49  
50  
51  
52  
53

### **Intended uses of instruments and their association to measurement properties**

54  
55 In our view, considering in the first place the intended use of the HRQoL instrument would  
56  
57 help to reconcile the different requirements included in each tool. Tools for evaluating the  
58  
59  
60

## TOOLS TO ASSESS HRQOL MEASUREMENT PROPERTIES

17

1  
2  
3 measurement quality of instruments should be adapted or extended according to the different  
4  
5 intended uses of these instruments, such as evaluative, impact of disease, analytic, diagnostic,  
6  
7 descriptive or predictive. Notice that depending on the intended use of the measure, some  
8  
9 domains of validity and reliability may be of greater or lesser relevance<sup>6,16</sup>. For instance, an  
10  
11 instrument developed to assess longitudinal changes should demonstrate high  
12  
13 responsiveness<sup>6</sup>, but if used for diagnostic purposes, it should be able to distinguish among  
14  
15 individuals or groups<sup>6</sup>, i.e. known groups validity. Another example is the internal  
16  
17 consistency reliability based on inter-item relationships, that may be not relevant for a  
18  
19 preference-based instrument but is relevant for an instrument based on a unidimensional  
20  
21 measurement model. However, our data showed that only a few authors established a clear  
22  
23 link in their recommendations between the intended use of the measure and the reported  
24  
25 evidence of measurement properties. The vast field of HRQoL offered a plethora of  
26  
27 instruments but, as most reviewers did not take the intended use of the instrument into  
28  
29 account, the overall rating of measurement properties was not consistent and thus the  
30  
31 instrument may or may not have been adequate for its intended use. Because the evaluation  
32  
33 and improvement of quality of life is considered a public health priority<sup>14</sup>, we strongly  
34  
35 encourage researchers to assess the quality of measurement properties of HRQoL instruments  
36  
37 according to the intended use of the measure. Otherwise, there is a serious risk of biased  
38  
39 results, which could lead to underrating the quality and suitability of the instrument.  
40  
41  
42  
43  
44  
45

*Conclusions*

46  
47  
48 The quality of the systematic review process has been increasing over time, but it should still  
49  
50 improve with regard to the prospective registration of protocol, and with respect to the  
51  
52 adoption of guidelines to improve both the methodological and reporting quality of the  
53  
54 reviews. In the specific context of systematic reviews of measurement instruments, enhancing  
55  
56 the quality of the process also involves the assessment of measurement properties by using a  
57  
58  
59  
60

## TOOLS TO ASSESS HRQOL MEASUREMENT PROPERTIES

18

1  
2  
3 standardized tool. The selection of the most suitable tool may be addressed according to the  
4  
5 coverage of the appraised measurement properties, but also according to other important  
6  
7 criteria, such as the intended use of the HRQoL instruments, the format of the tool, and  
8  
9 whether it assesses both usability (e.g. feasibility or burden) and accommodation (or  
10  
11 accessible forms). First, the assessment methodology should be adapted when necessary,  
12  
13 establishing the relation between the intended use of the HRQoL instruments and the  
14  
15 measurement properties assessed. Second, to standardize the review process, the tool's format  
16  
17 should be itemized offering a comparable approach to rate the evidence on measurement  
18  
19 properties. Those tools that take the form of guidelines, such as the SACMOT or the  
20  
21 Economic Evaluation would be considerably upgraded if the structure is reconverted, since  
22  
23 the current format only allows description rather than critical appraisal of the quality of an  
24  
25 instrument, and furthermore it complicates comparison of results. Lastly, because systematic  
26  
27 reviews on measurement properties aim to help professionals to select the best instrument for  
28  
29 a clinical scenario, the feasibility, patient's preferences, administrator and respondent burden,  
30  
31 and the accommodations (or accessible forms) should be addressed and evaluated. Otherwise  
32  
33 the suitability and the intended use of instruments might be compromised, especially in the  
34  
35 context of disability research. Tools identified in our meta-review that meet most of these  
36  
37 criteria are the COSMIN, EMPRO, SCI criteria, Andresen's tool, CanChild Outcomes, and  
38  
39 OMERACT, since all of them cover a wide range of measurement properties, offer an item  
40  
41 structure, and assess the usability of instruments.

42  
43 Special mention is due to the COSMIN, the most widespread and comprehensive tool to  
44  
45 assess measurement properties of health instruments designed for an evaluative purpose. The  
46  
47 COSMIN standards were developed in a Delphi study<sup>43</sup> aiming to improve the selection of  
48  
49 the most appropriate health instrument for a clinical scenario. The most recent version of the  
50  
51 COSMIN consists of a manual for conducting systematic reviews of health instruments,  
52  
53  
54  
55  
56  
57  
58  
59  
60

## TOOLS TO ASSESS HRQOL MEASUREMENT PROPERTIES

19

1  
2  
3 providing different steps with respect to the literature search process, the assessment of  
4 measurement properties and feasibility of instruments, and the evaluation of the risk of bias  
5 (RoB) of studies according to the Cochrane methodology<sup>16</sup>. Additionally, the COSMIN  
6 initiative recently developed a guideline exclusively focused on assessing the content validity  
7 of health instruments, considered the most important property to ensure the adequate  
8 reflection of the construct measured<sup>44,45</sup>. In the light of these considerations, we strongly  
9 recommend the application of the latest version of the COSMIN to conduct high quality  
10 systematic reviews on measurement properties of health instruments for an evaluative  
11 purpose, or for other purposes with appropriate adaptation.  
12  
13  
14  
15  
16  
17  
18  
19  
20  
21  
22

23 Despite COSMIN's many strengths, our analysis of the other assessment tools and  
24 measurement standards allow us to suggest future lines of work on this tool. First, the current  
25 format of COSMIN is fairly complex, requiring high expertise in the field of psychometrics  
26 and specific training for its proper application. The reporting of the inter-rater agreement  
27 coefficients when reviewers use the last version of COSMIN may provide useful data about  
28 its reliability. Second, consideration should be given to the Testing Standards  
29 recommendation on the inclusion of the assessment of fairness (i.e., evaluation of accessible  
30 forms for specific populations). Third, the feasibility of the measurement instruments, merely  
31 described in COSMIN, and their burden, should be properly rated, with examples found in  
32 EMPRO or Andresen's tool. Fourth, it must be considered that the RoB evaluation of studies  
33 is itself a productive field of research with a long tradition, with specific tools that have been  
34 developed for different research questions and study designs. Examples might be found in the  
35 Cochrane Collaboration's Tool for Assessing the Risk of Bias of Clinical Trials<sup>46</sup>, the  
36 Newcastle Ottawa Scale (NOS)<sup>47</sup> for nonrandomised studies, or the Quality Assessment Tool  
37 for Cohort Studies (Q-COH II)<sup>48,49</sup>. From our point of view, the COSMIN proposal could also  
38 be simplified and improved by guiding the reviewers towards the identification of the most  
39  
40  
41  
42  
43  
44  
45  
46  
47  
48  
49  
50  
51  
52  
53  
54  
55  
56  
57  
58  
59  
60

## TOOLS TO ASSESS HRQOL MEASUREMENT PROPERTIES

20

appropriate RoB assessment tools instead of developing their own RoB appraisal guidelines, taking advantage of knowledge and innovations in that field of research.

And last, but not least, improving the quality of systematic reviews encompasses researchers, sponsors and promoters, but also journals, which should require full compliance with reporting and methodological guidelines, and the use of assessment tools.

**Patient and Public Involvement**

No patient or public involvement.

**Ethics and dissemination**

Ethical approval is not necessary for meta-reviews.

**Data availability statement**

Data are available upon reasonable request to the authors.

**Authors' contribution**

All authors meet the criteria recommended by the International Committee of Medical Journal Editors, ICMJE. All authors made substantial contributions to conception and design, piloted the inclusion criteria and provided direction of the data extraction and analysis. SL drafted the article, and JV, CV and JML critically revised the draft for important intellectual content. All authors agreed on the final version.

**Funding statement**

This work was supported by the Grant PGC2018-100675-B-I00, Spanish Ministry of Science, Innovation and Universities (Spain).

**Competing interests' statement.**

The authors declare no conflict of interest. The authors have no financial relationships relevant to this article to disclose, and the funders had no role in the study design, data collection and analysis, decision to publish, or preparation of the manuscript.

**Correspondence**

Correspondence concerning this article should be addressed to Jaume Vives, Department of Psychobiology and Methodology of Health Science, Universitat Autònoma de Barcelona, UAB. E-mail: [jaume.vives@uab.cat](mailto:jaume.vives@uab.cat)

**Figure legend:** PRISMA flowchart. Flow diagram for search results.

For peer review only



**REFERENCES**

1. Mokkink L, Terwee C, Stratford P, et al. Evaluation of the methodological quality of systematic reviews of health status measurement instruments. *Qual Life Res.* 2009;18(3):313-333. doi:10.1007/s11136-009-9451-9
2. Terwee C, Prinsen C, Ricci Garotti M, Suman A, de Vet HCW, Mokkink LB. The quality of systematic reviews of health-related outcome measurement instruments. *Qual Life Res.* 2016;25:767-779. doi:10.1007/s11136-015-1122-4
3. Prinsen CA, Mokkink LB, Bouter LM, et al. COSMIN guideline for systematic reviews of Patient-Reported Outcome Measures. *Qual Life Res.* 2018:1-11. doi:10.1007/s11136-018-1798-3
4. Pussegoda K, Turner L, Garritty C, et al. Identifying approaches for assessing methodological and reporting quality of systematic reviews: A descriptive study. *Syst Rev.* 2017;6(1):1-12. doi:10.1186/s13643-017-0507-6
5. Pussegoda K, Turner L, Garritty C, et al. Systematic review adherence to methodological or reporting quality. *Syst Rev.* 2017;6(1):1-14. doi:10.1186/s13643-017-0527-2
6. Rosenkoetter U, Tate RL. Assessing Features of Psychometric Assessment Instruments: A Comparison of the COSMIN Checklist with Other Critical Appraisal Tools. *Brain Impair.* 2017:1-16. doi:10.1017/BrImp.2017.29
7. Reeve BB, Wyrwich KW, Wu AW, et al. ISOQOL recommends minimum standards for patient-reported outcome measures used in patient-centered outcomes and comparative effectiveness research. *Qual Life Res.* 2013;22(8):1889-1905. doi:10.1007/s11136-012-0344-y
8. Lorente S, Vives J, Viladrich C, Losilla JM. Tools to assess the measurement properties of quality of life instruments : a meta-review protocol. *BMJ Open.* 2018;8:1-

- 1  
2  
3 4. doi:10.1136/bmjopen-2018-022829
- 5  
6 9. Moher D, Liberati A, Tetzlaff J, Altman DG. Preferred Reporting Items for Systematic  
7  
8 Reviews and Meta-Analyses: The PRISMA Statement. *Ann Intern Med.*  
9  
10 2009;151(4):264-269. doi:10.1371/journal.pmed1000097
- 11  
12 10. Liberati A, Altman DG, Tetzlaff J, et al. The PRISMA Statement for Reporting  
13  
14 Systematic Reviews and Meta-Analyses of Studies That Evaluate Health Care  
15  
16 Interventions : Explanation and Elaboration. *Ann Intern Med.* 2009;151(4):W65-W94.  
17  
18 doi:10.1371/journal.pmed.1000100
- 19  
20 11. McGowan J, Sampson M, Salzwedel DM, Cogo E, Foerster V, Lefebvre C. PRESS  
21  
22 Peer Review of Electronic Search Strategies: 2015 Guideline Explanation and  
23  
24 Elaboration (PRESS E&E). *Cadth Methods Guidel.* 2016;(January):40-46.  
25  
26 doi:10.1016/j.jclinepi.2016.01.021
- 27  
28 12. McGowan J, Sampson M, Salzwedel DM, Cogo E, Foerster V, Lefebvre C. PRESS  
29  
30 Peer Review of Electronic Search Strategies: 2015 Guideline Statement. *J Clin*  
31  
32 *Epidemiol.* 2016;75:40-46. doi:10.1016/j.jclinepi.2016.01.021
- 33  
34 13. Terwee CB, Jansma EP, Riphagen II, De Vet H. Development of a methodological  
35  
36 PubMed search filter for finding studies on measurement properties of measurement  
37  
38 instruments. *Qual Life Res.* 2009;18(8):1115-1123. doi:10.1007/s11136-009-9528-5
- 39  
40 14. Secretary's Advisory Committee on National Health Promotion and Disease  
41  
42 Prevention Objectives. *Health-Related Quality of Life and Well-Being.*; 2010.  
43  
44 <https://www.healthypeople.gov/sites/default/files/HRQoLWBFullReport.pdf>.
- 45  
46 15. Mookink L, Terwee C, Patrick D, et al. *The COSMIN Checklist Manual.*; 2012.  
47  
48 [http://www.cosmin.nl/images/upload/files/COSMIN checklist manual v9.pdf](http://www.cosmin.nl/images/upload/files/COSMIN%20checklist%20manual%20v9.pdf).
- 49  
50 16. Mookink LB, Prinsen C, Patrick D, et al. COSMIN Methodology for systematic  
51  
52 reviews of Patient-Reported Outcome Measures (PROMs). User manual. 2018:1-78.  
53  
54  
55  
56  
57  
58  
59  
60

- 1  
2  
3 <http://www.cosmin.nl/>.  
4  
5  
6 17. Terwee C, Bot S, de Boer M, et al. Quality criteria were proposed for measurement  
7 properties of health status questionnaires. *J Clin Epidemiol*. 2007;60(1):34-42.  
8  
9 doi:10.1016/j.jclinepi.2006.03.012  
10  
11  
12 18. Aaronson N, Alonso J, Burnam A, et al. Assessing health status and quality-of-life  
13 instruments and review criteria. *Qual Life Res*. 2002;11(3):193-215.  
14  
15  
16 19. Lohr K, Aaronson N, Alonso J, Burnam M, Patrick D, Perrin E. Evaluating Quality of  
17 Life and Health status instruments: development of scientific review criteria. *Clin*  
18  
19  
20  
21  
22  
23  
24 20. Brazier J, Deverill M, Green C, Harper R, Booth A. A review of the use of health  
25 status measures in economic evaluation. *Health Technol Assess (Rockv)*. 1999;3(9).  
26  
27  
28 21. Brazier J, Ratcliffe J. Measurement and Valuation of Health for Economic Evaluation.  
29  
30  
31  
32  
33  
34  
35  
36  
37  
38  
39  
40  
41  
42  
43  
44  
45  
46  
47  
48  
49  
50  
51  
52  
53  
54  
55  
56  
57  
58  
59  
60
- In: *International Encyclopedia of Public Health*. Vol 4. Elsevier; 2017:586-593.  
doi:10.1016/B978-0-12-803678-5.00457-4
- Department of Health and Human Services. *Guidance for Industry Patient-Reported Outcome Measures: Use in Medical Product Development to Support Labeling Claims: Draft Guidance*. Vol 20.; 2006. doi:10.1186/1477-7525-4-79
- Department of Health and Human Services. *Guidance for Industry Patient-Reported Outcome Measures: Use in Medical Product Development to Support Labeling Claims.*; 2009. doi:10.1111/j.1524-4733.2009.00609.x
- Fitzpatrick R, Davey C, Buxton MJ, Jones DR. *Evaluating Patient-Based Outcome Measures for Use in Clinical Trials*. Vol 2.; 1998. doi:9812244
- World Health Organization. International Classification of Functioning (ICF).  
[www.who.int/classifications/icf/en/](http://www.who.int/classifications/icf/en/). Published 2016. Accessed February 6, 2020.
- Valderas JM, Ferrer M, Mendivil J, et al. Development of EMPRO: A tool for the

- 1  
2  
3 standardized assessment of patient-reported outcome measures. *Value Heal.*  
4  
5 2008;11(4):700-708. doi:10.1111/j.1524-4733.2007.00309.x  
6  
7  
8 27. SCIRE. Spinal Cord Injury Rehabilitation Evidence. <https://scireproject.com>.  
9  
10 28. Johnston M V, Graves DE. Towards guidelines for evaluation of measures: An  
11  
12 introduction with application to spinal cord injury. *J Spinal Cord Med.* 2008;31(1):13-  
13  
14 26. doi:10.1080/10790268.2008.11753976  
15  
16  
17 29. Andresen EM. Criteria for assessing the tools of disability outcomes research. *Arch*  
18  
19 *Phys Med Rehabil.* 2000;81(12 SUPPL. 2):15-20. doi:10.1053/apmr.2000.20619  
20  
21  
22 30. Law M. *Outcome Measures Rating Form Guidelines.*; 2004.  
23  
24 <https://www.canchild.ca/system/tenon/assets/attachments/000/000/371/original/measg>  
25  
26 [uid.pdf](#).  
27  
28  
29 31. OMERACT. Instrument selection for Core Outcome Measurement Sets. In:  
30  
31 *OMERACT Handbook.* ; 2019. <https://omeracthandbook.org/handbook>.  
32  
33  
34 32. APA, AERA, NCME. *Standards for Educational and Psychological Testing.*  
35  
36 American Educational Research Association.; 2014.  
37  
38 33. APA, AERA, NCME. *Standards for Educational and Psychological Testing.*  
39  
40 American Educational Research Association.; 1999.  
41  
42  
43 34. Cook DA, Beckman TJ. Current concepts in validity and reliability for psychometric  
44  
45 instruments: Theory and application. *Am J Med.* 2006;119(2):166.e7-166.e16.  
46  
47 doi:10.1016/j.amjmed.2005.10.036  
48  
49  
50 35. McDowell I, Spassoff RA, Kristjansson B. On the classification of population health  
51  
52 measurements. *Am J Public Health.* 2004;94(3):1413-1448.  
53  
54 doi:10.1142/s0217751x95000681  
55  
56  
57 36. Garin O, Ferrer M, Pont À, et al. Disease-specific health-related quality of life  
58  
59 questionnaires for heart failure: A systematic review with meta-analyses. *Qual Life*  
60

- 1  
2  
3  
4  
5  
6  
7  
8  
9  
10  
11  
12  
13  
14  
15  
16  
17  
18  
19  
20  
21  
22  
23  
24  
25  
26  
27  
28  
29  
30  
31  
32  
33  
34  
35  
36  
37  
38  
39  
40  
41  
42  
43  
44  
45  
46  
47  
48  
49  
50  
51  
52  
53  
54  
55  
56  
57  
58  
59  
60
- Res.* 2009;18(1):71-85. doi:10.1007/s11136-008-9416-4
37. Speight J, Howarth A. Quality of life in restless legs syndrome: A systematic review of clinical trials and a critical review of instruments. *Patient.* 2010;3(3):185-203. doi:10.2165/11534390-000000000-00000
38. Chassany O, Holtmann G, Malagelada J, Gebauer U, Doerfler H, Devault K. Systematic review: health-related quality of life (HRQOL) questionnaires in gastro-oesophageal reflux disease. *Aliment Pharmacol Ther.* 2008;27(11):1053-1070. doi:http://dx.doi.org/10.1111/j.1365-2036.2008.03683.x
39. Beattie M, Lauder W, Atherton I, Murphy DJ. Instruments to measure patient experience of health care quality in hospitals: a systematic review protocol. *Syst Rev.* 2014;3(1):4. doi:http://dx.doi.org/10.1186/2046-4053-3-4
40. Lorente S, Losilla JM, Vives J. Instruments to assess patient comfort during hospitalization: A psychometric review. *J Adv Nurs.* 2018;74(5):1001-1015. doi:10.1111/jan.13495
41. Ferrando PJ, Anguiano-Carrasco C. A Structural Model-Based Optimal Person-Fit Procedure for Identifying Faking. *Educ Psychol Meas.* 2012;73(2):173-190. doi:10.1177/0013164412460049
42. Ferrando PJ, Anguiano-Carrasco C. A structural equation model at the individual and group level for assessing faking-related change. *Struct Equ Model.* 2011;18(1):91-109. doi:10.1080/10705511.2011.532725
43. Mokkink LB, Terwee CB, Patrick DL, et al. The COSMIN checklist for assessing the methodological quality of studies on measurement properties of health status measurement instruments: An international Delphi study. *Qual Life Res.* 2010;19(4):539-549. doi:10.1007/s11136-010-9606-8
44. Terwee CB, Prinsen CA, Chiarotto A, et al. *COSMIN Methodology for Assessing the*

- 1  
2  
3  
4  
5  
6  
7  
8  
9  
10  
11  
12  
13  
14  
15  
16  
17  
18  
19  
20  
21  
22  
23  
24  
25  
26  
27  
28  
29  
30  
31  
32  
33  
34  
35  
36  
37  
38  
39  
40  
41  
42  
43  
44  
45  
46  
47  
48  
49  
50  
51  
52  
53  
54  
55  
56  
57  
58  
59  
60
- Content Validity of PROMs: User Manual*. Vol 120.; 2018.
45. Terwee CB, Prinsen CAC, Chiarotto A, et al. COSMIN methodology for evaluating the content validity of patient-reported outcome measures : a Delphi study. *Qual Life Res*. 2018;27(7). doi:10.1007/s11136-018-1829-0
46. Higgins J, Altman DG, Gøtzsche PC, et al. The Cochrane Collaboration's tool for assessing risk of bias in randomised trials. *BMJ*. 2011;343(7829):1-9. doi:10.1136/bmj.d5928
47. Wells G, Shea B, O'Connell D, et al. The Newcastle-Ottawa Scale (NOS) for assessing the quality of nonrandomised studies in meta-analyses 2000. [www.ohri.ca/programs/clinical\\_epidemiology/oxford.asp](http://www.ohri.ca/programs/clinical_epidemiology/oxford.asp).
48. Jarde A, Losilla J-M, Vives J, Rodrigo MF. Q-Coh : A tool to screen the methodological quality of cohort studies in systematic reviews and meta-analyses. *Int J Clin Heal Psychol*. 2013;13(2):138-146. doi:10.1016/S1697-2600(13)70017-6
49. Jarde A, Losilla J-M, Oliveras I, Vives J. Quality assessment tool for cohort studies (Q-COH II) User's manual. 2014:1-13.

## TOOLS TO ASSESS HRQOL MEASUREMENT PROPERTIES

28

Table 1. Reporting and methodological quality of studies

|                                                                    | 2008-2020  |            | 2014-2020  |            |
|--------------------------------------------------------------------|------------|------------|------------|------------|
|                                                                    | n          | %          | n          | %          |
| Protocol registered prospectively                                  |            |            |            |            |
| • Yes, PROSPERO                                                    | 27         | 10.9       | 26         | 20.5       |
| • No registered                                                    | 219        | 89.1       | 100        | 79.3       |
| Standards of systematic review reporting and/or quality assessment |            |            |            |            |
| • Yes (AMSTAR, PRISMA, QUOROM...)                                  | 78         | 31.7       | 64         | 50.8       |
| • No                                                               | 168        | 68.3       | 62         | 49.2       |
| Standards to assess reporting and/or quality assessment of primary |            |            |            |            |
| • Yes (QUADAS, STARD...)                                           | 42         | 17.0       | 30         | 23.8       |
| • No                                                               | 204        | 83.0       | 96         | 76.2       |
| Number of databases searched                                       |            |            |            |            |
| • 1-3                                                              | 96         | 39.1       | 50         | 39.6       |
| • 4-6                                                              | 107        | 43.4       | 61         | 48.4       |
| • 7-9                                                              | 22         | 8.9        | 8          | 6.3        |
| • >=10                                                             | 18         | 7.3        | 6          | 4.7        |
| • Not reported                                                     | 3          | 1.2        | 1          | 0.8        |
| Other sources                                                      |            |            |            |            |
| • Official websites/Internet                                       | 25         | 10.1       | 7          | 5.5        |
| • Virtual libraries                                                | 24         | 9.7        | 12         | 9.4        |
| • Google/Google Scholar                                            | 25         | 10.1       | 14         | 11.0       |
| • Scientific journals/Thesis                                       | 6          | 2.4        | 2          | 1.6        |
| Search strategy                                                    |            |            |            |            |
| Terms, databases, time period                                      |            |            |            |            |
| • Yes                                                              | 238        | 96.7       | 123        | 97.6       |
| • No                                                               | 8          | 3.3        | 3          | 2.4        |
| Search syntax                                                      |            |            |            |            |
| • Detailed syntax reported (Truncations, Booleans...)              | 115        | 46.7       | 79         | 62.7       |
| • Syntax not reported or not detailed enough to be replicable      | 125        | 50.8       | 46         | 36.5       |
| • Supplementary file under request (not available)                 | 5          | 2.1        | 1          | 0.8        |
| Inclusion / Exclusion selection criteria                           |            |            |            |            |
| • Reported and well-defined                                        | 229        | 93.1       | 122        | 96.8       |
| • Not reported or not clearly stated                               | 17         | 6.9        | 4          | 3.2        |
| Article selection                                                  |            |            |            |            |
| • By 2 or more independent reviewers                               | 134        | 54.4       | 87         | 69.0       |
| • Not reported or not clearly stated                               | 112        | 45.6       | 39         | 31.0       |
| Flow chart                                                         |            |            |            |            |
| • Yes                                                              | 166        | 67.5       | 108        | 85.7       |
| • No                                                               | 80         | 32.5       | 18         | 14.1       |
| Funding                                                            |            |            |            |            |
| • Reported                                                         | 132        | 53.7       | 69         | 54.8       |
| • Not reported or not clearly stated                               | 114        | 46.3       | 57         | 45.2       |
| <b>TOTAL</b>                                                       | <b>246</b> | <b>100</b> | <b>126</b> | <b>100</b> |

PROSPERO= Prospective Register of Systematic Reviews; AMSTAR=Assessment of Multiple Systematic reviews; PRISMA= Preferred Reporting Items for Systematic Reviews and Meta-Analyses; QUOROM=Quality of Reporting of Meta-analysis; QUADAS= Quality Assessment of Diagnostic Accuracy Studies; STARD= Standards for the Reporting of Diagnostic Accuracy Studies; n= frequency; %= percentage



TOOLS TO ASSESS HRQOL MEASUREMENT PROPERTIES

Table 2. Tools to assess measurement properties. Characteristics and comparison to Testing Standards

| Tools                         | 1)COSMIN                                                                                   | 2)TERWEE'S CRITERIA                                                         | 3)ATTRIBUTES & CRITERIA                                                                   | 4)ECONOMIC EVALUATION                                                                            | 5)GUIDANCE FOR INDUSTRY                                                                                                                            | 6)FITZPATRICK'S CRITERIA                                                                                        | 7)ICF ICFCY                      | 8)EMPRO                                                              | 9)SCI CRITERIA                                                                                                   | 10)ANDRESEN'S TOOL                                                                   | 11)CANCHILD OUTCOMES                                                                                | 12)OMERACT                                                                                                                   | 13)TESTING STANDARDS                                                                                                                                                      |
|-------------------------------|--------------------------------------------------------------------------------------------|-----------------------------------------------------------------------------|-------------------------------------------------------------------------------------------|--------------------------------------------------------------------------------------------------|----------------------------------------------------------------------------------------------------------------------------------------------------|-----------------------------------------------------------------------------------------------------------------|----------------------------------|----------------------------------------------------------------------|------------------------------------------------------------------------------------------------------------------|--------------------------------------------------------------------------------------|-----------------------------------------------------------------------------------------------------|------------------------------------------------------------------------------------------------------------------------------|---------------------------------------------------------------------------------------------------------------------------------------------------------------------------|
| <b>Development</b>            | Delphi                                                                                     | Author criteria                                                             | Expert panel                                                                              | Literature                                                                                       | Consensus                                                                                                                                          | Literature                                                                                                      |                                  | Expert panel                                                         | Expert panel Literature                                                                                          | Literature                                                                           | Expert panel                                                                                        | Expert Panel Delphi                                                                                                          | Consensus                                                                                                                                                                 |
| <b>Sponsor/s</b>              | COSMIN Initiative                                                                          | Author                                                                      | SACMOT Working group                                                                      | Standing Group of Health Technology                                                              | FDA Staff                                                                                                                                          | Standing Group of Health Technology                                                                             | WHO Member States                | IRYSS Committee                                                      | SCIRE Working group                                                                                              | Author                                                                               | CanChild Center Staff                                                                               | OMERACT Initiative                                                                                                           | AERA, APA NCME                                                                                                                                                            |
| <b>Approval Updates</b>       | 2010<br>2018                                                                               | 2007                                                                        | 1996<br>2002, 2013                                                                        | 1999<br>2017                                                                                     | 2006<br>2009                                                                                                                                       | 1998                                                                                                            | 2001<br>2019 <sup>a</sup>        | 2008                                                                 | 2008, 2016                                                                                                       | 2000                                                                                 | 1987 <sup>b</sup><br>2004                                                                           | 1992<br>1998,2007,2014,<br>2019                                                                                              | 1954<br>1966, 1974, 1985,<br>1999, 2014                                                                                                                                   |
| <b>Items (scoring)</b>        | 5-18 items/box (+ / - / ?)                                                                 | 8-9 items total (+ / - / ?)                                                 | Not item structured (no scoring)                                                          | Not item structured (no scoring)                                                                 | Not item structured (no scoring)                                                                                                                   | Not item structured (no scoring)                                                                                | Not item structured (no scoring) | 39 items(strongly agree, agree, disagree, strongly disagree)         | 3-5 items/box (++++ / +++ / ++ / +)                                                                              | 11 items total (A, B, C)                                                             | 2-6 items/box (excellent, adequate, poor)                                                           | 2-5 items/box (Green, amber, red, white)                                                                                     | Not item structured (no scoring)                                                                                                                                          |
| <b>Measurement properties</b> | Content Construct (Int.Structure Cross-Cultural Hypotheses test) Criterion (Gold standard) | Content Construct (Hypotheses test) Criterion (Gold standard) Floor/Ceiling | Conceptual & measurement model Face Construct (Hypotheses test) Criterion (Gold standard) | Descriptive (Content Construct) Preference-based valuation Empirical (Criterion) (Gold standard) | Conceptual model Content Construct (Hypothesis test, Discriminant, Convergent, Known groups) Criterion (Gold standard, sensitivity) Responsiveness | Use Content/Face Construct (Convergent, Discriminant, Int.Structure) Criterion (Predictive) Cut-score precision | Content                          | Conceptual & measurement model Construct (Hypotheses test) Criterion | Content Criterion (Concurrent Predictive "Discriminant") Clinical utility (Consequential validity) Floor/Ceiling | Conceptual & measurement model Instrument bias Int.Structure Convergent Discriminant | Use Scale construction Content Construct (Hypotheses test) Criterion (Gold standard) Responsiveness | Content, Face Construct (Convergent, Divergent) Criterion (Accuracy) Discrimination (Sensitivity over time & over treatment) | Content Response process Int. Structure (Dimensions, DIF) Relations to other variables (Hypotheses test,Convergent, Discriminant, Criterion, Responsiveness) Consequences |
| <b>Validity</b>               |                                                                                            |                                                                             |                                                                                           |                                                                                                  |                                                                                                                                                    |                                                                                                                 |                                  |                                                                      |                                                                                                                  |                                                                                      |                                                                                                     |                                                                                                                              |                                                                                                                                                                           |
| <b>Reliability</b>            | Int. Consistency Measurement error (Test retest, Agreement)                                | Int.Consistency Reproducibility (Agreement, Relative measurement error)     | Int.Consistency Reproducibility (Test retest, inter-rater)                                | Test retest Inter-rater                                                                          | Test retest Inter-rater Int.Consistency                                                                                                            | Int.Consistency Reproducibility (Test retest)                                                                   |                                  | Int.Consistency Reproducibility (Test retest, Inter-rater)           | Int.Consistency Test retest                                                                                      | Int.Consistency Test retest                                                          | Int.Consistency Intra/Inter-rater Test retest                                                       | Reproducibility Test retest                                                                                                  | Int.Consistency Test retest Alternate forms Scorers & Decision consistency/accuracy                                                                                       |
| <b>Fairness</b>               |                                                                                            |                                                                             |                                                                                           |                                                                                                  |                                                                                                                                                    |                                                                                                                 |                                  |                                                                      |                                                                                                                  |                                                                                      |                                                                                                     |                                                                                                                              | Equivalence of accommodations                                                                                                                                             |
| <b>Other characteristics</b>  |                                                                                            |                                                                             |                                                                                           |                                                                                                  |                                                                                                                                                    |                                                                                                                 |                                  |                                                                      | Norms                                                                                                            | Norms, Standard values                                                               | Norms Standardization                                                                               |                                                                                                                              | Scales, norms, Score comparability Test development and revision                                                                                                          |
|                               | Interpretability                                                                           | Interpretability                                                            | Interpretability                                                                          |                                                                                                  | Interpretability                                                                                                                                   | Interpretability                                                                                                |                                  | Interpretability                                                     |                                                                                                                  |                                                                                      |                                                                                                     |                                                                                                                              |                                                                                                                                                                           |
|                               |                                                                                            |                                                                             | Burden                                                                                    |                                                                                                  | Burden                                                                                                                                             | Acceptability (Burden)                                                                                          |                                  | Burden                                                               | Burden                                                                                                           | Burden                                                                               |                                                                                                     |                                                                                                                              |                                                                                                                                                                           |
|                               |                                                                                            |                                                                             | Administration Accessible forms                                                           |                                                                                                  | Administration Accessible forms                                                                                                                    |                                                                                                                 |                                  | Administration                                                       | Administration Accessible forms                                                                                  | Administration Accessible forms                                                      |                                                                                                     |                                                                                                                              |                                                                                                                                                                           |
|                               |                                                                                            |                                                                             | Cultural Adaptations                                                                      | Practicality                                                                                     |                                                                                                                                                    | Feasibility Cultural Adaptations                                                                                |                                  | Cultural Adaptations                                                 | Applicability Cultural Adaptations                                                                               | Cultural Adaptations                                                                 | Clinical utility (Feasibility)                                                                      | Feasibility                                                                                                                  |                                                                                                                                                                           |
| <b>Frequency of use (%)</b>   | 61 (30.4)                                                                                  | 45 (22.4)                                                                   | 33 (16.4)                                                                                 | 17 (8.4)                                                                                         | 14 (6.9)                                                                                                                                           | 14 (6.9)                                                                                                        | 7 (3.4)                          | 4 (2.0)                                                              | 2 (1.0)                                                                                                          | 2 (1.0)                                                                              | 1(0.5)                                                                                              | 1 (0.5)                                                                                                                      | 0                                                                                                                                                                         |

Note: DIF= Differential Item Functioning; %=Percentage; Invariance=Measurement invariance; Int.Structure= Internal Structure; Int. Consistency= Internal Consistency; AERA= American Educational Research Association; APA= American Psychological Association; NCME= National Council on Measurement in Education; SACMOT= Scientific Advisory Committee Medical Outcomes Trust; FDA= Food and Drug Administration; WHO= World Health Organization; IRYSS= Spanish Cooperative Investigation Network for Health and Health Service Outcomes Research; SCIRE= Spinal Cord Injury Rehabilitation Evidence; COSMIN=Consensus Standards for Selection of Health Measurement Instruments; TERWEE'S CRITERIA= Quality Criteria for Measurement Properties; ATTRIBUTES&CRITERIA= Attributes and Criteria to assess Health Status and Quality of Life Instruments; ECONOMIC EVALUATION= Health Status Measures in Economic Evaluation; GUIDANCE FOR INDUSTRY=Guidance for Industry patient-reported outcomes measures; FITZPATRICK'S CRITERIA=Evaluating patient-based outcomes measures for use in clinical trials.; ICF= International Classification of Functioning; ICFCY= International Classification of Functioning for Children and Youth; EMPRO= Evaluating Measures of Patient Reported Outcomes; SCI CRITERIA= Spinal Cord Injury guidelines; ANDRESEN'S TOOL=Criteria for Assessing the Tools of Disability Outcomes Research; CANCHILD OUTCOMES= CanChild Outcomes Measures; OMERACT= Outcomes Measures in Rheumatology Clinical Trials; TESTING STANDARDS= Standards for Educational and Psychological Testing. See text for references.

<sup>a</sup>Updated version at website, <sup>b</sup> Reference at 2004

## TOOLS TO ASSESS HRQOL MEASUREMENT PROPERTIES

30

Table 3. Intended use of instruments and their association to measurement properties

| <b>Intended use of instruments identified across the systematic reviews</b>    |                                                                                                                                                                                            | <b>Frequency</b> | <b>% (Over 246)</b> |
|--------------------------------------------------------------------------------|--------------------------------------------------------------------------------------------------------------------------------------------------------------------------------------------|------------------|---------------------|
| Evaluative (Change scores pre-post studies. Effectiveness of an intervention)  |                                                                                                                                                                                            | 178              | 72.3                |
| Impact of disease on HRQoL (disease symptoms, burden...)                       |                                                                                                                                                                                            | 138              | 55.1                |
| Analytic (Health policies. Cost-effectiveness. Funding)                        |                                                                                                                                                                                            | 35               | 14.2                |
| Diagnostic (Distinguish between groups, levels of severity...)                 |                                                                                                                                                                                            | 16               | 6.5                 |
| Descriptive (Health measures in surveys. Needs of groups of people)            |                                                                                                                                                                                            | 4                | 1.6                 |
| Predictive (Anticipation of future health status. Risk factors. Risk profiles) |                                                                                                                                                                                            | 2                | 0.8                 |
| Intended use is no reported or no clearly stated                               |                                                                                                                                                                                            | 6                | 2.4                 |
| <b>Conclusions according to the intended use of instruments</b>                |                                                                                                                                                                                            | <b>n</b>         | <b>% (Over 246)</b> |
| Yes, reviewers made specific conclusions                                       |                                                                                                                                                                                            | 68               | 27.6                |
| No, reviewers made general conclusions                                         |                                                                                                                                                                                            | 178              | 72.4                |
| <b>Measurement properties associated to the intended use of the instrument</b> |                                                                                                                                                                                            | <b>n</b>         | <b>% (Over 68)</b>  |
| Evaluative                                                                     | Responsiveness / Conceptual and Measurement Model / Content validity / Reliability (internal consistency, test retest) / Respondent Burden / Convergent validity / Cross cultural validity | 41               | 60.3                |
| Impact                                                                         | Conceptual and Measurement Model / Content validity                                                                                                                                        | 29               | 42.6                |
| Analytic                                                                       | Preference-based valuation / Agreement                                                                                                                                                     | 11               | 16.2                |
| Diagnostic                                                                     | Known groups validity / Test retest                                                                                                                                                        | 7                | 10.3                |
| Predictive                                                                     | Sensitivity and specificity                                                                                                                                                                | 1                | 1.5                 |

Note: (%) =Percentage

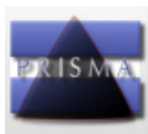

## PRISMA 2009 Flow Diagram

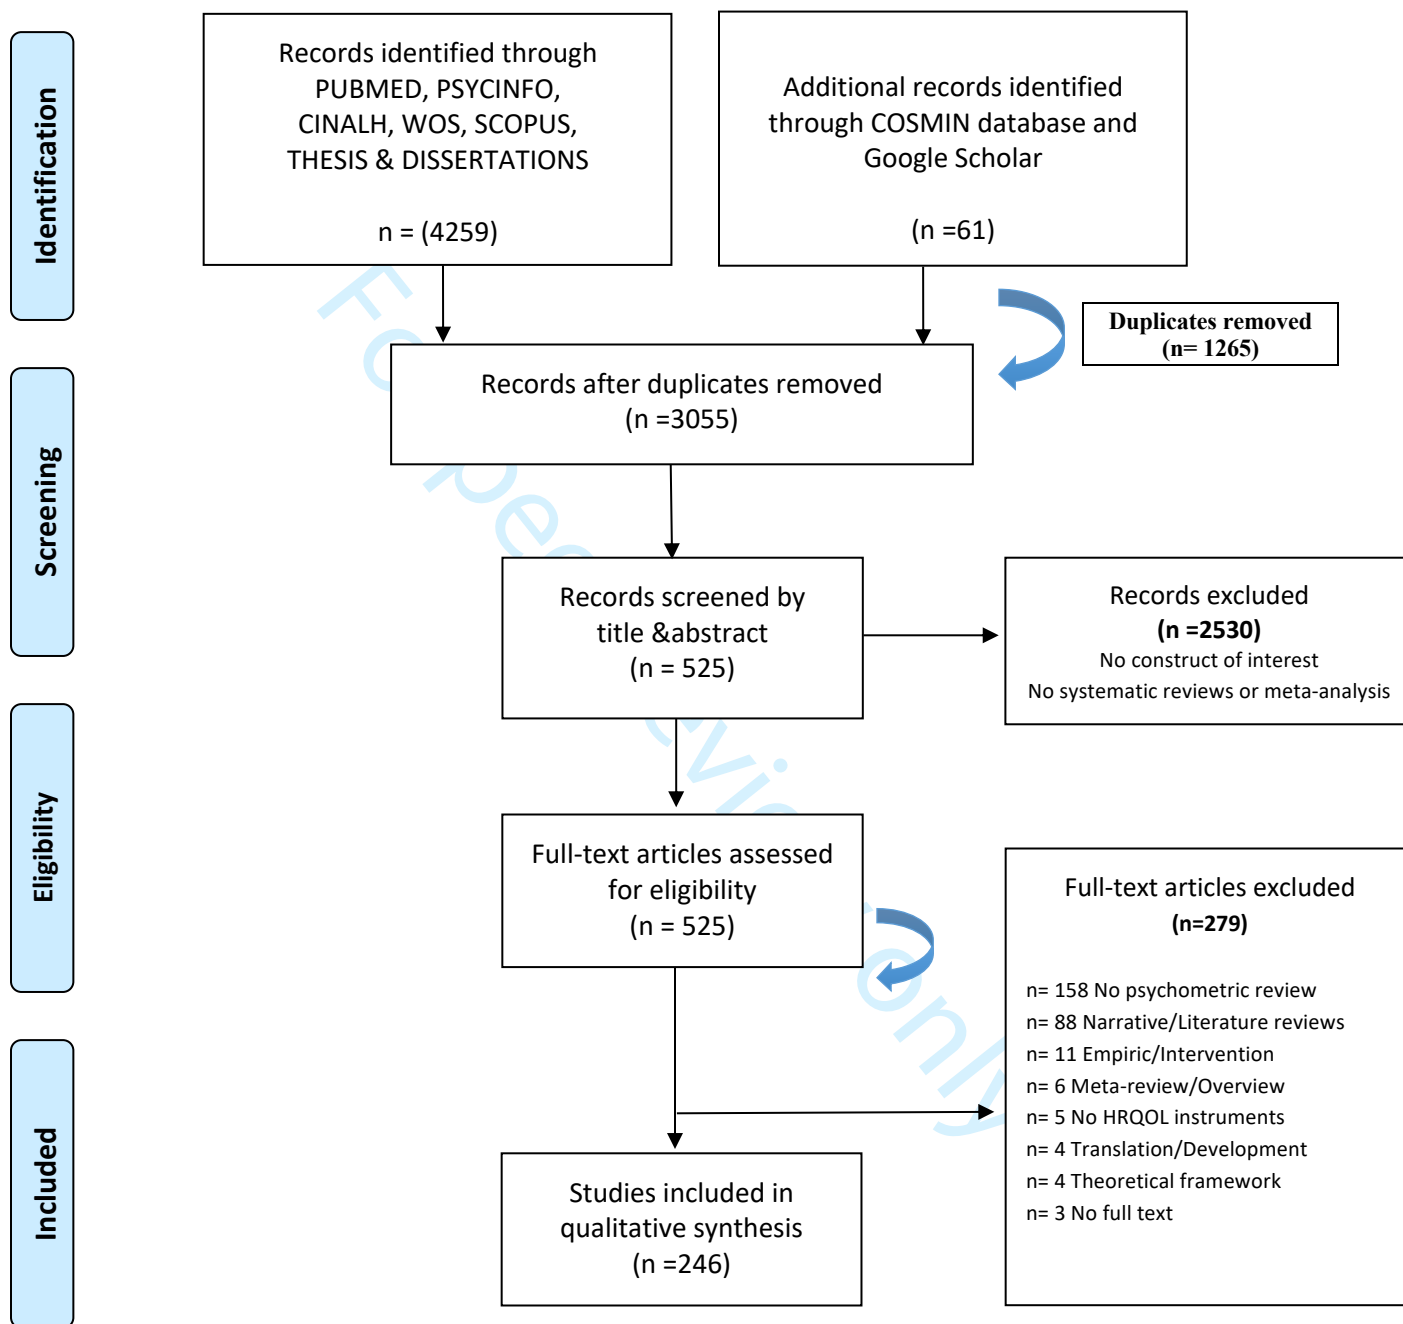

From: Moher D, Liberati A, Tetzlaff J, Altman DG, The PRISMA Group (2009). Preferred Reporting Items for Systematic Reviews and Meta-Analyses: The PRISMA Statement. PLoS Med 6(6): e1000097. doi:10.1371/journal.pmed1000097

For more information, visit [www.prisma-statement.org](http://www.prisma-statement.org).

For peer review only - <http://bmjopen.bmj.com/site/about/guidelines.xhtml>

## Supplementary File S1. Search strategy

## Search strings for Pubmed

|    |                                                                                                                                                                                                                                                                                                                                                                                                                                                                                                                                                                                                                                                                                                                                                                                                                                                                                                                                                                                                                                                                                                                                                                                                                                                                                                                                                                                                                                                                                                                                                                                                                                                                                                                                                                                                                                                                                                                                                                                                                                                                                                                                                                                                                                                                                                                                                                                                                                                                                                                                                                                                                                                                                                                                                                                                                                                                                                                                                                                                                                                                                                                                                                                                                                                                                                                                                                                                                                                                                                                                                                                                                                                                                                                                                                        |
|----|------------------------------------------------------------------------------------------------------------------------------------------------------------------------------------------------------------------------------------------------------------------------------------------------------------------------------------------------------------------------------------------------------------------------------------------------------------------------------------------------------------------------------------------------------------------------------------------------------------------------------------------------------------------------------------------------------------------------------------------------------------------------------------------------------------------------------------------------------------------------------------------------------------------------------------------------------------------------------------------------------------------------------------------------------------------------------------------------------------------------------------------------------------------------------------------------------------------------------------------------------------------------------------------------------------------------------------------------------------------------------------------------------------------------------------------------------------------------------------------------------------------------------------------------------------------------------------------------------------------------------------------------------------------------------------------------------------------------------------------------------------------------------------------------------------------------------------------------------------------------------------------------------------------------------------------------------------------------------------------------------------------------------------------------------------------------------------------------------------------------------------------------------------------------------------------------------------------------------------------------------------------------------------------------------------------------------------------------------------------------------------------------------------------------------------------------------------------------------------------------------------------------------------------------------------------------------------------------------------------------------------------------------------------------------------------------------------------------------------------------------------------------------------------------------------------------------------------------------------------------------------------------------------------------------------------------------------------------------------------------------------------------------------------------------------------------------------------------------------------------------------------------------------------------------------------------------------------------------------------------------------------------------------------------------------------------------------------------------------------------------------------------------------------------------------------------------------------------------------------------------------------------------------------------------------------------------------------------------------------------------------------------------------------------------------------------------------------------------------------------------------------------|
| 1  | ("Quality of Life"[Mesh] OR HRQL[tiab] OR HRQoL[tiab] OR QoL[tiab] OR "quality of life"[tiab])                                                                                                                                                                                                                                                                                                                                                                                                                                                                                                                                                                                                                                                                                                                                                                                                                                                                                                                                                                                                                                                                                                                                                                                                                                                                                                                                                                                                                                                                                                                                                                                                                                                                                                                                                                                                                                                                                                                                                                                                                                                                                                                                                                                                                                                                                                                                                                                                                                                                                                                                                                                                                                                                                                                                                                                                                                                                                                                                                                                                                                                                                                                                                                                                                                                                                                                                                                                                                                                                                                                                                                                                                                                                         |
| 2  | (instrument[tiab] OR instruments[tiab] OR questionnaire[tiab] OR questionnaires[tiab] OR scale[tiab] OR scales[tiab] OR tool[tiab] OR tools[tiab])                                                                                                                                                                                                                                                                                                                                                                                                                                                                                                                                                                                                                                                                                                                                                                                                                                                                                                                                                                                                                                                                                                                                                                                                                                                                                                                                                                                                                                                                                                                                                                                                                                                                                                                                                                                                                                                                                                                                                                                                                                                                                                                                                                                                                                                                                                                                                                                                                                                                                                                                                                                                                                                                                                                                                                                                                                                                                                                                                                                                                                                                                                                                                                                                                                                                                                                                                                                                                                                                                                                                                                                                                     |
| 3  | (Validation Studies[pt] OR "reproducibility of results"[MeSH Terms] OR reproducib*[tiab] OR "psychometrics"[MeSH] OR psychometr*[tiab] OR clinimetr*[tiab] OR clinometr*[tiab] OR "observer variation"[MeSH] OR observer variation[tiab] OR "discriminant analysis"[MeSH] OR reliab*[tiab] OR valid*[tiab] OR coefficient[tiab] OR "internal consistency"[tiab] OR (cronbach*[tiab] AND (alpha[tiab] OR alphas[tiab])) OR "item correlation"[tiab] OR "item correlations"[tiab] OR "item selection"[tiab] OR "item selections"[tiab] OR "item reduction"[tiab] OR "item reductions"[tiab] OR agreement[tw] OR precision[tw] OR imprecision[tw] OR "precise values"[tw] OR test-retest [tiab] OR (test[tiab] AND retest[tiab]) OR (reliab*[tiab] AND (test[tiab] OR retest[tiab])) OR stability[tiab] OR interrater[tiab] OR inter-rater[tiab] OR intrarater[tiab] OR intra-rater[tiab] OR intertester[tiab] OR inter-tester[tiab] OR intratester[tiab] OR intra-tester[tiab] OR interobserver[tiab] OR inter-observer[tiab] OR intraobserver[tiab] OR intra-observer[tiab] OR intertechnician[tiab] OR inter-technician[tiab] OR intratechnician[tiab] OR intra-technician[tiab] OR interexaminer[tiab] OR inter-examiner[tiab] OR intraexaminer[tiab] OR intra-examiner[tiab] OR interassay[tiab] OR inter-assay[tiab] OR intraassay[tiab] OR intra-assay[tiab] OR interindividual[tiab] OR inter-individual[tiab] OR intraindividual[tiab] OR intra-individual[tiab] OR interparticipant[tiab] OR inter-participant[tiab] OR intraparticipant[tiab] OR intra-participant[tiab] OR kappa[tiab] OR "kappa's"[tiab] OR kappas[tiab] OR "coefficient of variation"[tiab] OR repeatab*[tw] OR ((replicab*[tw] OR repeated[tw]) AND (measure[tw] OR measures[tw] OR findings[tw] OR result[tw] OR results[tw] OR test[tw] OR tests[tw])) OR generaliza*[tiab] OR generalisa*[tiab] OR concordance[tiab] OR (intraclass[tiab] AND correlation*[tiab]) OR discriminative[tiab] OR "known group"[tiab] OR "factor analysis"[tiab] OR "factor analyses"[tiab] OR "factor structure"[tiab] OR "factor structure"[tiab] OR dimensionality[tiab] OR subscale*[tiab] OR "multitrait scaling analysis"[tiab] OR "multitrait scaling analyses"[tiab] OR "item discriminant"[tiab] OR "interscale correlation"[tiab] OR "interscale correlations"[tiab] OR ((error[tiab] OR errors[tiab]) AND (measure*[tiab] OR correlat*[tiab] OR evaluat*[tiab] OR accuracy[tiab] OR accurate[tiab] OR precision[tiab] OR mean[tiab])) OR "individual variability"[tiab] OR "interval variability"[tiab] OR "rate variability"[tiab] OR "variability analysis"[tiab] OR (uncertainty[tiab] AND (measurement[tiab] OR measuring[tiab])) OR "standard error of measurement"[tiab] OR sensitiv*[tiab] OR responsive*[tiab] OR (limit[tiab] AND detection[tiab]) OR "minimal detectable concentration"[tiab] OR interpretab*[tiab] OR (small*[tiab] AND (real[tiab] OR detectable[tiab]) AND (change[tiab] OR difference[tiab])) OR "meaningful change"[tiab] OR "minimal important change"[tiab] OR "minimal important difference"[tiab] OR "minimally important change"[tiab] OR "minimally important difference"[tiab] OR "minimal detectable change"[tiab] OR "minimal detectable difference"[tiab] OR "minimally detectable change"[tiab] OR "minimally detectable difference"[tiab] OR "minimal real change"[tiab] OR "minimal real difference"[tiab] OR "minimally real change"[tiab] OR "minimally real difference"[tiab] OR "ceiling effect"[tiab] OR "floor effect"[tiab] OR "Item response model"[tiab] OR IRT[tiab] OR Rasch[tiab] OR "Differential item functioning"[tiab] OR DIF [tiab] OR "computer adaptive testing"[tiab] OR "item bank"[tiab] OR "cross-cultural equivalence"[tiab]) |
| 4  | #1 AND #2 AND #3                                                                                                                                                                                                                                                                                                                                                                                                                                                                                                                                                                                                                                                                                                                                                                                                                                                                                                                                                                                                                                                                                                                                                                                                                                                                                                                                                                                                                                                                                                                                                                                                                                                                                                                                                                                                                                                                                                                                                                                                                                                                                                                                                                                                                                                                                                                                                                                                                                                                                                                                                                                                                                                                                                                                                                                                                                                                                                                                                                                                                                                                                                                                                                                                                                                                                                                                                                                                                                                                                                                                                                                                                                                                                                                                                       |
| 5  | ("protocol"[ti] OR "addresses"[Publication Type] OR "biography"[Publication Type] OR "case reports"[Publication Type] OR "comment"[Publication Type] OR "directory"[Publication Type] OR "editorial"[Publication Type] OR "festschrift"[Publication Type] OR "interview"[Publication Type] OR "lectures"[Publication Type] OR "legal cases"[Publication Type] OR "legislation"[Publication Type] OR "letter"[Publication Type] OR "news"[Publication Type] OR "newspaper article"[Publication Type] OR "patient education handout"[Publication Type] OR "popular works"[Publication Type] OR "congresses"[Publication Type] OR "consensus development conference"[Publication Type] OR "consensus development conference"[Publication Type] OR "practice guideline"[Publication Type])                                                                                                                                                                                                                                                                                                                                                                                                                                                                                                                                                                                                                                                                                                                                                                                                                                                                                                                                                                                                                                                                                                                                                                                                                                                                                                                                                                                                                                                                                                                                                                                                                                                                                                                                                                                                                                                                                                                                                                                                                                                                                                                                                                                                                                                                                                                                                                                                                                                                                                                                                                                                                                                                                                                                                                                                                                                                                                                                                                                 |
| 6  | #4 NOT #5                                                                                                                                                                                                                                                                                                                                                                                                                                                                                                                                                                                                                                                                                                                                                                                                                                                                                                                                                                                                                                                                                                                                                                                                                                                                                                                                                                                                                                                                                                                                                                                                                                                                                                                                                                                                                                                                                                                                                                                                                                                                                                                                                                                                                                                                                                                                                                                                                                                                                                                                                                                                                                                                                                                                                                                                                                                                                                                                                                                                                                                                                                                                                                                                                                                                                                                                                                                                                                                                                                                                                                                                                                                                                                                                                              |
| 7  | FILTER: Article Type (Review or Systematic Review)                                                                                                                                                                                                                                                                                                                                                                                                                                                                                                                                                                                                                                                                                                                                                                                                                                                                                                                                                                                                                                                                                                                                                                                                                                                                                                                                                                                                                                                                                                                                                                                                                                                                                                                                                                                                                                                                                                                                                                                                                                                                                                                                                                                                                                                                                                                                                                                                                                                                                                                                                                                                                                                                                                                                                                                                                                                                                                                                                                                                                                                                                                                                                                                                                                                                                                                                                                                                                                                                                                                                                                                                                                                                                                                     |
| 8  | FILTER: Subject (Systematic Review)                                                                                                                                                                                                                                                                                                                                                                                                                                                                                                                                                                                                                                                                                                                                                                                                                                                                                                                                                                                                                                                                                                                                                                                                                                                                                                                                                                                                                                                                                                                                                                                                                                                                                                                                                                                                                                                                                                                                                                                                                                                                                                                                                                                                                                                                                                                                                                                                                                                                                                                                                                                                                                                                                                                                                                                                                                                                                                                                                                                                                                                                                                                                                                                                                                                                                                                                                                                                                                                                                                                                                                                                                                                                                                                                    |
| 9  | FILTER: Language (English)                                                                                                                                                                                                                                                                                                                                                                                                                                                                                                                                                                                                                                                                                                                                                                                                                                                                                                                                                                                                                                                                                                                                                                                                                                                                                                                                                                                                                                                                                                                                                                                                                                                                                                                                                                                                                                                                                                                                                                                                                                                                                                                                                                                                                                                                                                                                                                                                                                                                                                                                                                                                                                                                                                                                                                                                                                                                                                                                                                                                                                                                                                                                                                                                                                                                                                                                                                                                                                                                                                                                                                                                                                                                                                                                             |
| 10 | FILTER: Period (2008-2018)                                                                                                                                                                                                                                                                                                                                                                                                                                                                                                                                                                                                                                                                                                                                                                                                                                                                                                                                                                                                                                                                                                                                                                                                                                                                                                                                                                                                                                                                                                                                                                                                                                                                                                                                                                                                                                                                                                                                                                                                                                                                                                                                                                                                                                                                                                                                                                                                                                                                                                                                                                                                                                                                                                                                                                                                                                                                                                                                                                                                                                                                                                                                                                                                                                                                                                                                                                                                                                                                                                                                                                                                                                                                                                                                             |

## Search strings for CINAHL

|   |                                                                                                                                                                                                                                                                                                                                                                                                                                                                                                                                                                                                                                                                                                                                                                                                                                                                                                                                                                                                                                                                                                                                                                                                                                                                                                                                                                                                                                                                                                                                                                                                                                                                                                                                                                                                                                                                                                                                                                                                                                                                                                                                                                                                                                                                                                                                                                                                                                                                                                                                                                                                                                                                                                                                                                                                                                                                                                                                                                                                                                                                                                                                                                                                                                                                                                                                                                                                                                                                                                                                                                                                                                                                                                                                                                                                                                                                                                                                                                                                                                                                                                                                                                                                                                                                                                                                                                                                                                                                                                                                                                                                                                                                                                                                                                                                                                                                                                                                                                                                                                                                                                                                                                                                                                                                                                                                                                                                                                                                                                                                                                                                                                                                                                                                            |
|---|--------------------------------------------------------------------------------------------------------------------------------------------------------------------------------------------------------------------------------------------------------------------------------------------------------------------------------------------------------------------------------------------------------------------------------------------------------------------------------------------------------------------------------------------------------------------------------------------------------------------------------------------------------------------------------------------------------------------------------------------------------------------------------------------------------------------------------------------------------------------------------------------------------------------------------------------------------------------------------------------------------------------------------------------------------------------------------------------------------------------------------------------------------------------------------------------------------------------------------------------------------------------------------------------------------------------------------------------------------------------------------------------------------------------------------------------------------------------------------------------------------------------------------------------------------------------------------------------------------------------------------------------------------------------------------------------------------------------------------------------------------------------------------------------------------------------------------------------------------------------------------------------------------------------------------------------------------------------------------------------------------------------------------------------------------------------------------------------------------------------------------------------------------------------------------------------------------------------------------------------------------------------------------------------------------------------------------------------------------------------------------------------------------------------------------------------------------------------------------------------------------------------------------------------------------------------------------------------------------------------------------------------------------------------------------------------------------------------------------------------------------------------------------------------------------------------------------------------------------------------------------------------------------------------------------------------------------------------------------------------------------------------------------------------------------------------------------------------------------------------------------------------------------------------------------------------------------------------------------------------------------------------------------------------------------------------------------------------------------------------------------------------------------------------------------------------------------------------------------------------------------------------------------------------------------------------------------------------------------------------------------------------------------------------------------------------------------------------------------------------------------------------------------------------------------------------------------------------------------------------------------------------------------------------------------------------------------------------------------------------------------------------------------------------------------------------------------------------------------------------------------------------------------------------------------------------------------------------------------------------------------------------------------------------------------------------------------------------------------------------------------------------------------------------------------------------------------------------------------------------------------------------------------------------------------------------------------------------------------------------------------------------------------------------------------------------------------------------------------------------------------------------------------------------------------------------------------------------------------------------------------------------------------------------------------------------------------------------------------------------------------------------------------------------------------------------------------------------------------------------------------------------------------------------------------------------------------------------------------------------------------------------------------------------------------------------------------------------------------------------------------------------------------------------------------------------------------------------------------------------------------------------------------------------------------------------------------------------------------------------------------------------------------------------------------------------------------------------------------------------|
| 1 | TI "quality of life" OR "HRQOL" OR AB "quality of life" OR "HRQOL"                                                                                                                                                                                                                                                                                                                                                                                                                                                                                                                                                                                                                                                                                                                                                                                                                                                                                                                                                                                                                                                                                                                                                                                                                                                                                                                                                                                                                                                                                                                                                                                                                                                                                                                                                                                                                                                                                                                                                                                                                                                                                                                                                                                                                                                                                                                                                                                                                                                                                                                                                                                                                                                                                                                                                                                                                                                                                                                                                                                                                                                                                                                                                                                                                                                                                                                                                                                                                                                                                                                                                                                                                                                                                                                                                                                                                                                                                                                                                                                                                                                                                                                                                                                                                                                                                                                                                                                                                                                                                                                                                                                                                                                                                                                                                                                                                                                                                                                                                                                                                                                                                                                                                                                                                                                                                                                                                                                                                                                                                                                                                                                                                                                                         |
| 2 | TI (instrument OR instruments OR questionnaire OR questionnaires OR scale OR scale OR tool OR tools) OR AB (instrument OR instruments OR questionnaire OR questionnaires OR scale OR scale OR tool OR tools)                                                                                                                                                                                                                                                                                                                                                                                                                                                                                                                                                                                                                                                                                                                                                                                                                                                                                                                                                                                                                                                                                                                                                                                                                                                                                                                                                                                                                                                                                                                                                                                                                                                                                                                                                                                                                                                                                                                                                                                                                                                                                                                                                                                                                                                                                                                                                                                                                                                                                                                                                                                                                                                                                                                                                                                                                                                                                                                                                                                                                                                                                                                                                                                                                                                                                                                                                                                                                                                                                                                                                                                                                                                                                                                                                                                                                                                                                                                                                                                                                                                                                                                                                                                                                                                                                                                                                                                                                                                                                                                                                                                                                                                                                                                                                                                                                                                                                                                                                                                                                                                                                                                                                                                                                                                                                                                                                                                                                                                                                                                               |
| 3 | TI ("Validation Studies" OR "reproducibility of results" OR reproducib* OR "psychometrics" OR psychometr* OR clinimetr* OR clinometr* OR "observer variation" OR observer variation OR "discriminant analysis" OR reliab* OR valid* OR coefficient OR "internal consistency" OR (cronbach* AND (alpha OR alphas)) OR "item correlation" OR "item correlations" OR "item selection" OR "item selections" OR "item reduction" OR "item reductions" OR agreement OR precision OR imprecision OR "precise values" OR test-retest OR (test AND retest) OR (reliab* AND (test OR retest)) OR stability OR interrater OR inter-rater OR intrarater OR intra-rater OR intertester OR inter-tester OR intratester OR intra-tester OR interobserver OR inter-observer OR intraobserver OR intra-observer OR intertechnician OR inter-technician OR intratechnician OR intra-technician OR interexaminer OR inter-examiner OR intraexaminer OR intra-examiner OR interassay OR inter-assay OR intraassay OR intra-assay OR interindividual OR inter-individual OR intraindividual OR intra-individual OR interparticipant OR inter-participant OR intraparticipant OR intra-participant OR kappa OR "kappa's" OR kappas OR "coefficient of variation" OR repeatab* OR ((replicab* OR repeated) AND (measure OR measures OR findings OR result OR results OR test OR tests)) OR generaliza* OR generalisa* OR concordance OR (intraclass AND correlation*) OR discriminative OR "known group" OR "factor analysis" OR "factor analyses" OR "factor structure" OR "factor structure" OR dimensionality OR subscale* OR "multitrait scaling analysis" OR "multitrait scaling analyses" OR "item discriminant" OR "interscale correlation" OR "interscale correlations" OR ((error OR errors) AND (measure* OR correlat* OR evaluat* OR accuracy OR accurate OR precision OR mean)) OR "individual variability" OR "interval variability" OR "rate variability" OR "variability analysis" OR (uncertainty AND (measurement OR measuring)) OR "standard error of measurement" OR sensitiv* OR responsive* OR (limit AND detection) OR "minimal detectable concentration" OR interpretab* OR (small* AND (real OR detectable) AND (change OR difference)) OR "meaningful change" OR "minimal important change" OR "minimal important difference" OR "minimally important change" OR "minimally important difference" OR "minimal detectable change" OR "minimal detectable difference" OR "minimally detectable change" OR "minimally detectable difference" OR "minimal real change" OR "minimal real difference" OR "minimally real change" OR "minimally real difference" OR "ceiling effect" OR "floor effect" OR "Item response model" OR IRT OR Rasch OR "Differential item functioning" OR DIF OR "computer adaptive testing" OR "item bank" OR "cross-cultural equivalence") OR AB ("Validation Studies" OR "reproducibility of results" OR reproducib* OR "psychometrics" OR psychometr* OR clinimetr* OR clinometr* OR "observer variation" OR observer variation OR "discriminant analysis" OR reliab* OR valid* OR coefficient OR "internal consistency" OR (cronbach* AND (alpha OR alphas)) OR "item correlation" OR "item correlations" OR "item selection" OR "item selections" OR "item reduction" OR "item reductions" OR agreement OR precision OR imprecision OR "precise values" OR test-retest OR (test AND retest) OR (reliab* AND (test OR retest)) OR stability OR interrater OR inter-rater OR intrarater OR intra-rater OR intertester OR inter-tester OR intratester OR intra-tester OR interobserver OR inter-observer OR intraobserver OR intra-observer OR intertechnician OR inter-technician OR intratechnician OR intra-technician OR interexaminer OR inter-examiner OR intraexaminer OR intra-examiner OR interassay OR inter-assay OR intraassay OR intra-assay OR interindividual OR inter-individual OR intraindividual OR intra-individual OR interparticipant OR inter-participant OR intraparticipant OR intra-participant OR kappa OR "kappa's" OR kappas OR "coefficient of variation" OR repeatab* OR ((replicab* OR repeated) AND (measure OR measures OR findings OR result OR results OR test OR tests)) OR generaliza* OR generalisa* OR concordance OR (intraclass AND correlation*) OR discriminative OR "known group" OR "factor analysis" OR "factor analyses" OR "factor structure" OR "factor structure" OR dimensionality OR subscale* OR "multitrait scaling analysis" OR "multitrait scaling analyses" OR "item discriminant" OR "interscale correlation" OR "interscale correlations" OR ((error OR errors) AND (measure* OR correlat* OR evaluat* OR accuracy OR accurate OR precision OR mean)) OR "individual variability" OR "interval variability" OR "rate variability" OR "variability analysis" OR (uncertainty AND (measurement OR measuring)) OR "standard error of measurement" OR sensitiv* OR responsive* OR (limit AND detection) OR "minimal detectable concentration" OR interpretab* OR (small* AND (real OR detectable) AND (change OR difference)) OR "meaningful change" OR "minimal important change" OR "minimal important difference" OR "minimally important change" OR "minimally important difference" OR "minimal detectable change" OR "minimal detectable difference" OR "minimally detectable change" OR "minimally detectable difference" OR "minimal real change" OR "minimal real difference" OR "minimally real change" OR "minimally real difference" OR "ceiling effect" OR "floor effect" OR "Item response model" OR IRT OR Rasch OR "Differential item functioning" OR DIF OR "computer adaptive testing" OR "item bank" OR "cross-cultural equivalence") |
| 4 | TI review OR AB review                                                                                                                                                                                                                                                                                                                                                                                                                                                                                                                                                                                                                                                                                                                                                                                                                                                                                                                                                                                                                                                                                                                                                                                                                                                                                                                                                                                                                                                                                                                                                                                                                                                                                                                                                                                                                                                                                                                                                                                                                                                                                                                                                                                                                                                                                                                                                                                                                                                                                                                                                                                                                                                                                                                                                                                                                                                                                                                                                                                                                                                                                                                                                                                                                                                                                                                                                                                                                                                                                                                                                                                                                                                                                                                                                                                                                                                                                                                                                                                                                                                                                                                                                                                                                                                                                                                                                                                                                                                                                                                                                                                                                                                                                                                                                                                                                                                                                                                                                                                                                                                                                                                                                                                                                                                                                                                                                                                                                                                                                                                                                                                                                                                                                                                     |
| 5 | #1 AND #2 AND #3 AND #4                                                                                                                                                                                                                                                                                                                                                                                                                                                                                                                                                                                                                                                                                                                                                                                                                                                                                                                                                                                                                                                                                                                                                                                                                                                                                                                                                                                                                                                                                                                                                                                                                                                                                                                                                                                                                                                                                                                                                                                                                                                                                                                                                                                                                                                                                                                                                                                                                                                                                                                                                                                                                                                                                                                                                                                                                                                                                                                                                                                                                                                                                                                                                                                                                                                                                                                                                                                                                                                                                                                                                                                                                                                                                                                                                                                                                                                                                                                                                                                                                                                                                                                                                                                                                                                                                                                                                                                                                                                                                                                                                                                                                                                                                                                                                                                                                                                                                                                                                                                                                                                                                                                                                                                                                                                                                                                                                                                                                                                                                                                                                                                                                                                                                                                    |
| 6 | TI ("protocol" OR "addresses" OR "biography" OR "case reports" OR "comment" OR "directory" OR "editorial" OR "festschrift" OR "interview" OR "lectures" OR "legal cases" OR "legislation" OR "letter" OR "news" OR "newspaper article" OR "patient education handout" OR "popular works" OR "congresses" OR "consensus development conference" OR "consensus development conference" OR "practice guideline")                                                                                                                                                                                                                                                                                                                                                                                                                                                                                                                                                                                                                                                                                                                                                                                                                                                                                                                                                                                                                                                                                                                                                                                                                                                                                                                                                                                                                                                                                                                                                                                                                                                                                                                                                                                                                                                                                                                                                                                                                                                                                                                                                                                                                                                                                                                                                                                                                                                                                                                                                                                                                                                                                                                                                                                                                                                                                                                                                                                                                                                                                                                                                                                                                                                                                                                                                                                                                                                                                                                                                                                                                                                                                                                                                                                                                                                                                                                                                                                                                                                                                                                                                                                                                                                                                                                                                                                                                                                                                                                                                                                                                                                                                                                                                                                                                                                                                                                                                                                                                                                                                                                                                                                                                                                                                                                              |
| 7 | #5 NOT #6                                                                                                                                                                                                                                                                                                                                                                                                                                                                                                                                                                                                                                                                                                                                                                                                                                                                                                                                                                                                                                                                                                                                                                                                                                                                                                                                                                                                                                                                                                                                                                                                                                                                                                                                                                                                                                                                                                                                                                                                                                                                                                                                                                                                                                                                                                                                                                                                                                                                                                                                                                                                                                                                                                                                                                                                                                                                                                                                                                                                                                                                                                                                                                                                                                                                                                                                                                                                                                                                                                                                                                                                                                                                                                                                                                                                                                                                                                                                                                                                                                                                                                                                                                                                                                                                                                                                                                                                                                                                                                                                                                                                                                                                                                                                                                                                                                                                                                                                                                                                                                                                                                                                                                                                                                                                                                                                                                                                                                                                                                                                                                                                                                                                                                                                  |
| 7 | FILTER: Language (English)                                                                                                                                                                                                                                                                                                                                                                                                                                                                                                                                                                                                                                                                                                                                                                                                                                                                                                                                                                                                                                                                                                                                                                                                                                                                                                                                                                                                                                                                                                                                                                                                                                                                                                                                                                                                                                                                                                                                                                                                                                                                                                                                                                                                                                                                                                                                                                                                                                                                                                                                                                                                                                                                                                                                                                                                                                                                                                                                                                                                                                                                                                                                                                                                                                                                                                                                                                                                                                                                                                                                                                                                                                                                                                                                                                                                                                                                                                                                                                                                                                                                                                                                                                                                                                                                                                                                                                                                                                                                                                                                                                                                                                                                                                                                                                                                                                                                                                                                                                                                                                                                                                                                                                                                                                                                                                                                                                                                                                                                                                                                                                                                                                                                                                                 |
| 8 | FILTER: Period (2008-2018)                                                                                                                                                                                                                                                                                                                                                                                                                                                                                                                                                                                                                                                                                                                                                                                                                                                                                                                                                                                                                                                                                                                                                                                                                                                                                                                                                                                                                                                                                                                                                                                                                                                                                                                                                                                                                                                                                                                                                                                                                                                                                                                                                                                                                                                                                                                                                                                                                                                                                                                                                                                                                                                                                                                                                                                                                                                                                                                                                                                                                                                                                                                                                                                                                                                                                                                                                                                                                                                                                                                                                                                                                                                                                                                                                                                                                                                                                                                                                                                                                                                                                                                                                                                                                                                                                                                                                                                                                                                                                                                                                                                                                                                                                                                                                                                                                                                                                                                                                                                                                                                                                                                                                                                                                                                                                                                                                                                                                                                                                                                                                                                                                                                                                                                 |

---

 Search strings for PsycInfo
 

---

- |   |                                                                                                                                                                                                                                            |
|---|--------------------------------------------------------------------------------------------------------------------------------------------------------------------------------------------------------------------------------------------|
| 1 | it=Quality of life                                                                                                                                                                                                                         |
| 2 | it=Questionnaires OR it="Rating Scales" OR it=Screening OR it="Screening Tests" OR it="Psychological Assessment" OR it=Inventories OR it="Individual Testing" OR it="Human Factors Measures" OR it="Checklist Testing" OR it=Psychometrics |
| 3 | #1 AND #2                                                                                                                                                                                                                                  |
| 4 | FILTER: Methodology (Literature Review)                                                                                                                                                                                                    |
| 5 | FILTER: Language (English)                                                                                                                                                                                                                 |
| 6 | FILTER: Period (2008-2018)                                                                                                                                                                                                                 |

---

 Search strings for Scopus
 

---

- |   |                                                                                                                                                                                                                                                                                                                                                                                                                                                                                                                                                                                                                                                                                                                                                                                                                                                                                                                                                                                                                                                                                                                                                                                                                                                                                                                                                                                                                                                                                                                                                                                                                                                                                                                                                                                                                                                                                                                                                                                                                                                                                                                                                                                                                                                                                                                                                                                                                                                                                                                                                                                                                                                                                                                                                                                                                                                                               |
|---|-------------------------------------------------------------------------------------------------------------------------------------------------------------------------------------------------------------------------------------------------------------------------------------------------------------------------------------------------------------------------------------------------------------------------------------------------------------------------------------------------------------------------------------------------------------------------------------------------------------------------------------------------------------------------------------------------------------------------------------------------------------------------------------------------------------------------------------------------------------------------------------------------------------------------------------------------------------------------------------------------------------------------------------------------------------------------------------------------------------------------------------------------------------------------------------------------------------------------------------------------------------------------------------------------------------------------------------------------------------------------------------------------------------------------------------------------------------------------------------------------------------------------------------------------------------------------------------------------------------------------------------------------------------------------------------------------------------------------------------------------------------------------------------------------------------------------------------------------------------------------------------------------------------------------------------------------------------------------------------------------------------------------------------------------------------------------------------------------------------------------------------------------------------------------------------------------------------------------------------------------------------------------------------------------------------------------------------------------------------------------------------------------------------------------------------------------------------------------------------------------------------------------------------------------------------------------------------------------------------------------------------------------------------------------------------------------------------------------------------------------------------------------------------------------------------------------------------------------------------------------------|
| 1 | TITLE-ABS-KEY("Quality of life" OR "HRQOL")                                                                                                                                                                                                                                                                                                                                                                                                                                                                                                                                                                                                                                                                                                                                                                                                                                                                                                                                                                                                                                                                                                                                                                                                                                                                                                                                                                                                                                                                                                                                                                                                                                                                                                                                                                                                                                                                                                                                                                                                                                                                                                                                                                                                                                                                                                                                                                                                                                                                                                                                                                                                                                                                                                                                                                                                                                   |
| 2 | TITLE-ABS-KEY(instrument OR instruments OR questionnaire OR questionnaires OR scale OR scale OR tool OR tools)                                                                                                                                                                                                                                                                                                                                                                                                                                                                                                                                                                                                                                                                                                                                                                                                                                                                                                                                                                                                                                                                                                                                                                                                                                                                                                                                                                                                                                                                                                                                                                                                                                                                                                                                                                                                                                                                                                                                                                                                                                                                                                                                                                                                                                                                                                                                                                                                                                                                                                                                                                                                                                                                                                                                                                |
| 3 | TITLE-ABS-KEY("Validation Studies" OR "reproducibility of results" OR reproducib* OR "psychometrics" OR psychometr* OR clinimetr* OR clinometr* OR "observer variation" OR observer variation OR "discriminant analysis" OR reliab* OR valid* OR coefficient OR "internal consistency" OR (cronbach* AND (alpha OR alphas)) OR "item correlation" OR "item correlations" OR "item selection" OR "item selections" OR "item reduction" OR "item reductions" OR agreement OR precision OR imprecision OR "precise values" OR test-retest OR (test AND retest) OR (reliab* AND (test OR retest)) OR stability OR interrater OR inter-rater OR intrarater OR intra-rater OR intertester OR inter-tester OR intratester OR intra-tester OR interobserver OR inter-observer OR intraobserver OR intra-observer OR intertechnician OR inter-technician OR intratechnician OR intra-technician OR interexaminer OR inter-examiner OR intraexaminer OR intra-examiner OR interassay OR inter-assay OR intraassay OR intra-assay OR interindividual OR inter-individual OR intraindividual OR intra-individual OR interparticipant OR inter-participant OR intraparticipant OR intra-participant OR kappa OR "kappa's" OR kappas OR "coefficient of variation" OR repeatab* OR ((replicab* OR repeated) AND (measure OR measures OR findings OR result OR results OR test OR tests)) OR generaliza* OR generalisa* OR concordance OR (intraclass AND correlation*) OR discriminative OR "known group" OR "factor analysis" OR "factor analyses" OR "factor structure" OR "factor structure" OR dimensionality OR subscale* OR "multitrait scaling analysis" OR "multitrait scaling analyses" OR "item discriminant" OR "interscale correlation" OR "interscale correlations" OR ((error OR errors) AND (measure* OR correlat* OR evaluat* OR accuracy OR accurate OR precision OR mean)) OR "individual variability" OR "interval variability" OR "rate variability" OR "variability analysis" OR (uncertainty AND (measurement OR measuring)) OR "standard error of measurement" OR sensitiv* OR responsive* OR (limit AND detection) OR "minimal detectable concentration" OR interpretab* OR (small* AND (real OR detectable) AND (change OR difference)) OR "meaningful change" OR "minimal important change" OR "minimal important difference" OR "minimally important change" OR "minimally important difference" OR "minimal detectable change" OR "minimal detectable difference" OR "minimally detectable change" OR "minimally detectable difference" OR "minimal real change" OR "minimal real difference" OR "minimally real change" OR "minimally real difference" OR "ceiling effect" OR "floor effect" OR "Item response model" OR IRT OR Rasch OR "Differential item functioning" OR DIF OR "computer adaptive testing" OR "item bank" OR "cross-cultural equivalence") |
| 4 | #1 AND #2 AND #3                                                                                                                                                                                                                                                                                                                                                                                                                                                                                                                                                                                                                                                                                                                                                                                                                                                                                                                                                                                                                                                                                                                                                                                                                                                                                                                                                                                                                                                                                                                                                                                                                                                                                                                                                                                                                                                                                                                                                                                                                                                                                                                                                                                                                                                                                                                                                                                                                                                                                                                                                                                                                                                                                                                                                                                                                                                              |
| 5 | TITLE("protocol" OR "addresses" OR "biography" OR "case reports" OR "comment" OR "directory" OR "editorial" OR "festschrift" OR "interview" OR "lectures" OR "legal cases" OR "legislation" OR "letter" OR "news" OR "newspaper article" OR "patient education handout" OR "popular works" OR "congresses" OR "consensus development conference" OR "consensus development conference" OR "practice guideline")                                                                                                                                                                                                                                                                                                                                                                                                                                                                                                                                                                                                                                                                                                                                                                                                                                                                                                                                                                                                                                                                                                                                                                                                                                                                                                                                                                                                                                                                                                                                                                                                                                                                                                                                                                                                                                                                                                                                                                                                                                                                                                                                                                                                                                                                                                                                                                                                                                                               |
| 6 | #4 NOT #5                                                                                                                                                                                                                                                                                                                                                                                                                                                                                                                                                                                                                                                                                                                                                                                                                                                                                                                                                                                                                                                                                                                                                                                                                                                                                                                                                                                                                                                                                                                                                                                                                                                                                                                                                                                                                                                                                                                                                                                                                                                                                                                                                                                                                                                                                                                                                                                                                                                                                                                                                                                                                                                                                                                                                                                                                                                                     |
| 7 | FILTER: Document Type (Review)                                                                                                                                                                                                                                                                                                                                                                                                                                                                                                                                                                                                                                                                                                                                                                                                                                                                                                                                                                                                                                                                                                                                                                                                                                                                                                                                                                                                                                                                                                                                                                                                                                                                                                                                                                                                                                                                                                                                                                                                                                                                                                                                                                                                                                                                                                                                                                                                                                                                                                                                                                                                                                                                                                                                                                                                                                                |
| 8 | FILTER: Language (English)                                                                                                                                                                                                                                                                                                                                                                                                                                                                                                                                                                                                                                                                                                                                                                                                                                                                                                                                                                                                                                                                                                                                                                                                                                                                                                                                                                                                                                                                                                                                                                                                                                                                                                                                                                                                                                                                                                                                                                                                                                                                                                                                                                                                                                                                                                                                                                                                                                                                                                                                                                                                                                                                                                                                                                                                                                                    |
| 9 | FILTER: Period (2008-2018)                                                                                                                                                                                                                                                                                                                                                                                                                                                                                                                                                                                                                                                                                                                                                                                                                                                                                                                                                                                                                                                                                                                                                                                                                                                                                                                                                                                                                                                                                                                                                                                                                                                                                                                                                                                                                                                                                                                                                                                                                                                                                                                                                                                                                                                                                                                                                                                                                                                                                                                                                                                                                                                                                                                                                                                                                                                    |

## Search strings for Web of Science (WoS)

|   |                                                                                                                                                                                                                                                                                                                                                                                                                                                                                                                                                                                                                                                                                                                                                                                                                                                                                                                                                                                                                                                                                                                                                                                                                                                                                                                                                                                                                                                                                                                                                                                                                                                                                                                                                                                                                                                                                                                                                                                                                                                                                                                                                                                                                                                                                                                                                                                                                                                                                                                                                                                                                                                                                                                                                                                                                                                                   |
|---|-------------------------------------------------------------------------------------------------------------------------------------------------------------------------------------------------------------------------------------------------------------------------------------------------------------------------------------------------------------------------------------------------------------------------------------------------------------------------------------------------------------------------------------------------------------------------------------------------------------------------------------------------------------------------------------------------------------------------------------------------------------------------------------------------------------------------------------------------------------------------------------------------------------------------------------------------------------------------------------------------------------------------------------------------------------------------------------------------------------------------------------------------------------------------------------------------------------------------------------------------------------------------------------------------------------------------------------------------------------------------------------------------------------------------------------------------------------------------------------------------------------------------------------------------------------------------------------------------------------------------------------------------------------------------------------------------------------------------------------------------------------------------------------------------------------------------------------------------------------------------------------------------------------------------------------------------------------------------------------------------------------------------------------------------------------------------------------------------------------------------------------------------------------------------------------------------------------------------------------------------------------------------------------------------------------------------------------------------------------------------------------------------------------------------------------------------------------------------------------------------------------------------------------------------------------------------------------------------------------------------------------------------------------------------------------------------------------------------------------------------------------------------------------------------------------------------------------------------------------------|
| 1 | TI=("Quality of Life" OR "HRQOL")                                                                                                                                                                                                                                                                                                                                                                                                                                                                                                                                                                                                                                                                                                                                                                                                                                                                                                                                                                                                                                                                                                                                                                                                                                                                                                                                                                                                                                                                                                                                                                                                                                                                                                                                                                                                                                                                                                                                                                                                                                                                                                                                                                                                                                                                                                                                                                                                                                                                                                                                                                                                                                                                                                                                                                                                                                 |
| 2 | TS=(instrument OR instruments OR questionnaire OR questionnaires OR scale OR scales OR tool OR tools)                                                                                                                                                                                                                                                                                                                                                                                                                                                                                                                                                                                                                                                                                                                                                                                                                                                                                                                                                                                                                                                                                                                                                                                                                                                                                                                                                                                                                                                                                                                                                                                                                                                                                                                                                                                                                                                                                                                                                                                                                                                                                                                                                                                                                                                                                                                                                                                                                                                                                                                                                                                                                                                                                                                                                             |
| 3 | TS=("Validation Studies" OR "reproducibility of results" OR reproducib* OR "psychometrics" OR psychometr* OR clinimetr* OR clinometr* OR "observer variation" OR observer variation OR "discriminant analysis" OR reliab* OR valid* OR coefficient OR "internal consistency" OR (cronbach* AND (alpha OR alphas)) OR "item correlation" OR "item correlations" OR "item selection" OR "item selections" OR "item reduction" OR "item reductions" OR agreement OR precision OR imprecision OR "precise values" OR test-retest OR (test AND retest) OR (reliab* AND (test OR retest)) OR stability OR interrater OR inter-rater OR intrarater OR intra-rater OR intertester OR inter-tester OR intratester OR intra-tester OR interobserver OR inter-observer OR intraobserver OR intra-observer OR intertechnician OR inter-technician OR intratechnician OR intra-technician OR interexaminer OR inter-examiner OR intraexaminer OR intra-examiner OR interassay OR inter-assay OR intraassay OR intra-assay OR interindividual OR inter-individual OR intraindividual OR intra-individual OR interparticipant OR inter-participant OR intraparticipant OR intra-participant OR kappa OR "kappa's" OR kappas OR "coefficient of variation" OR repeatab* OR ((replicab* OR repeated) AND (measure OR measures OR findings OR result OR results OR test OR tests)) OR generaliza* OR generalisa* OR concordance OR (intraclass AND correlation*) OR discriminative OR "known group" OR "factor analysis" OR "factor analyses" OR "factor structure" OR "factor structure" OR dimensionality OR subscale* OR "multitrait scaling analysis" OR "multitrait scaling analyses" OR "item discriminant" OR "interscale correlation" OR "interscale correlations" OR (error OR errors) AND (measure* OR correlat* OR evaluat* OR accuracy OR accurate OR precision OR mean) OR "individual variability" OR "interval variability" OR "rate variability" OR "variability analysis" OR (uncertainty AND (measurement OR measuring)) OR "standard error of measurement" OR sensitiv* OR responsive* OR (limit AND detection) OR "minimal detectable concentration" OR interpretab* OR (small* AND (real OR detectable) AND (change OR difference)) OR "meaningful change" OR "minimal important change" OR "minimal important difference" OR "minimally important change" OR "minimally important difference" OR "minimal detectable change" OR "minimal detectable difference" OR "minimally detectable change" OR "minimally detectable difference" OR "minimal real change" OR "minimal real difference" OR "minimally real change" OR "minimally real difference" OR "ceiling effect" OR "floor effect" OR "Item response model" OR IRT OR Rasch OR "Differential item functioning" OR DIF OR "computer adaptive testing" OR "item bank" OR "cross-cultural equivalence") |
| 4 | #1 AND #2 AND #3                                                                                                                                                                                                                                                                                                                                                                                                                                                                                                                                                                                                                                                                                                                                                                                                                                                                                                                                                                                                                                                                                                                                                                                                                                                                                                                                                                                                                                                                                                                                                                                                                                                                                                                                                                                                                                                                                                                                                                                                                                                                                                                                                                                                                                                                                                                                                                                                                                                                                                                                                                                                                                                                                                                                                                                                                                                  |
| 5 | TI=("protocol" OR "addresses" OR "biography" OR "case reports" OR "comment" OR "directory" OR "editorial" OR "festschrift" OR "interview" OR "lectures" OR "legal cases" OR "legislation" OR "letter" OR "news" OR "newspaper article" OR "patient education handout" OR "popular works" OR "congresses" OR "consensus development conference" OR "consensus development conference" OR "practice guideline")                                                                                                                                                                                                                                                                                                                                                                                                                                                                                                                                                                                                                                                                                                                                                                                                                                                                                                                                                                                                                                                                                                                                                                                                                                                                                                                                                                                                                                                                                                                                                                                                                                                                                                                                                                                                                                                                                                                                                                                                                                                                                                                                                                                                                                                                                                                                                                                                                                                     |
| 6 | #4 NOT #5                                                                                                                                                                                                                                                                                                                                                                                                                                                                                                                                                                                                                                                                                                                                                                                                                                                                                                                                                                                                                                                                                                                                                                                                                                                                                                                                                                                                                                                                                                                                                                                                                                                                                                                                                                                                                                                                                                                                                                                                                                                                                                                                                                                                                                                                                                                                                                                                                                                                                                                                                                                                                                                                                                                                                                                                                                                         |
| 7 | FILTER: Document Type (Literature Review)                                                                                                                                                                                                                                                                                                                                                                                                                                                                                                                                                                                                                                                                                                                                                                                                                                                                                                                                                                                                                                                                                                                                                                                                                                                                                                                                                                                                                                                                                                                                                                                                                                                                                                                                                                                                                                                                                                                                                                                                                                                                                                                                                                                                                                                                                                                                                                                                                                                                                                                                                                                                                                                                                                                                                                                                                         |
| 8 | FILTER: Language (English)                                                                                                                                                                                                                                                                                                                                                                                                                                                                                                                                                                                                                                                                                                                                                                                                                                                                                                                                                                                                                                                                                                                                                                                                                                                                                                                                                                                                                                                                                                                                                                                                                                                                                                                                                                                                                                                                                                                                                                                                                                                                                                                                                                                                                                                                                                                                                                                                                                                                                                                                                                                                                                                                                                                                                                                                                                        |
| 9 | FILTER: Period (2008-2018)                                                                                                                                                                                                                                                                                                                                                                                                                                                                                                                                                                                                                                                                                                                                                                                                                                                                                                                                                                                                                                                                                                                                                                                                                                                                                                                                                                                                                                                                                                                                                                                                                                                                                                                                                                                                                                                                                                                                                                                                                                                                                                                                                                                                                                                                                                                                                                                                                                                                                                                                                                                                                                                                                                                                                                                                                                        |



## Search strings for ProQuest Dissertations &amp; Theses Global

|   |                                                                                                                                                                                                                                                                                                                                                                                                                                                                                                                                                                                                                                                                                                                                                                                                                                                                                                                                                                                                                                                                                                                                                                                                                                                                                                                                                                                                                                                                                                                                                                                                                                                                                                                                                                                                                                                                                                                                                                                                                                                                                                                                                                                                                                                                                                                                                                                                                                                                                                                                                                                                                                                                                                                                                                                                                                                                                                                                                                                                                                                                                                                                                                                                                                                                                                                                                                                                                                                                                                                                                                                                                                                                                                                                                                                                                                                                                                                                                                                                                                                                                                                                                                                                                                                                                                                                                                                                                                                                                                                                                                                                                                                                                                                                                                                                                                                                                                                                                                                                                                                                                                                                                                                                                                                                                                                                                                                                                                                                                                                                                                                                                                                                                                                                          |
|---|------------------------------------------------------------------------------------------------------------------------------------------------------------------------------------------------------------------------------------------------------------------------------------------------------------------------------------------------------------------------------------------------------------------------------------------------------------------------------------------------------------------------------------------------------------------------------------------------------------------------------------------------------------------------------------------------------------------------------------------------------------------------------------------------------------------------------------------------------------------------------------------------------------------------------------------------------------------------------------------------------------------------------------------------------------------------------------------------------------------------------------------------------------------------------------------------------------------------------------------------------------------------------------------------------------------------------------------------------------------------------------------------------------------------------------------------------------------------------------------------------------------------------------------------------------------------------------------------------------------------------------------------------------------------------------------------------------------------------------------------------------------------------------------------------------------------------------------------------------------------------------------------------------------------------------------------------------------------------------------------------------------------------------------------------------------------------------------------------------------------------------------------------------------------------------------------------------------------------------------------------------------------------------------------------------------------------------------------------------------------------------------------------------------------------------------------------------------------------------------------------------------------------------------------------------------------------------------------------------------------------------------------------------------------------------------------------------------------------------------------------------------------------------------------------------------------------------------------------------------------------------------------------------------------------------------------------------------------------------------------------------------------------------------------------------------------------------------------------------------------------------------------------------------------------------------------------------------------------------------------------------------------------------------------------------------------------------------------------------------------------------------------------------------------------------------------------------------------------------------------------------------------------------------------------------------------------------------------------------------------------------------------------------------------------------------------------------------------------------------------------------------------------------------------------------------------------------------------------------------------------------------------------------------------------------------------------------------------------------------------------------------------------------------------------------------------------------------------------------------------------------------------------------------------------------------------------------------------------------------------------------------------------------------------------------------------------------------------------------------------------------------------------------------------------------------------------------------------------------------------------------------------------------------------------------------------------------------------------------------------------------------------------------------------------------------------------------------------------------------------------------------------------------------------------------------------------------------------------------------------------------------------------------------------------------------------------------------------------------------------------------------------------------------------------------------------------------------------------------------------------------------------------------------------------------------------------------------------------------------------------------------------------------------------------------------------------------------------------------------------------------------------------------------------------------------------------------------------------------------------------------------------------------------------------------------------------------------------------------------------------------------------------------------------------------------------------------------------------------------|
| 1 | ti("Quality of life" OR HRQOL) OR ab("Quality of life" OR HRQOL)                                                                                                                                                                                                                                                                                                                                                                                                                                                                                                                                                                                                                                                                                                                                                                                                                                                                                                                                                                                                                                                                                                                                                                                                                                                                                                                                                                                                                                                                                                                                                                                                                                                                                                                                                                                                                                                                                                                                                                                                                                                                                                                                                                                                                                                                                                                                                                                                                                                                                                                                                                                                                                                                                                                                                                                                                                                                                                                                                                                                                                                                                                                                                                                                                                                                                                                                                                                                                                                                                                                                                                                                                                                                                                                                                                                                                                                                                                                                                                                                                                                                                                                                                                                                                                                                                                                                                                                                                                                                                                                                                                                                                                                                                                                                                                                                                                                                                                                                                                                                                                                                                                                                                                                                                                                                                                                                                                                                                                                                                                                                                                                                                                                                         |
| 2 | ti(instrument OR instruments OR questionnaire OR questionnaires OR scale OR scales OR tool OR tools) OR ab(instrument OR instruments OR questionnaire OR questionnaires OR scale OR scales OR tool OR tools)                                                                                                                                                                                                                                                                                                                                                                                                                                                                                                                                                                                                                                                                                                                                                                                                                                                                                                                                                                                                                                                                                                                                                                                                                                                                                                                                                                                                                                                                                                                                                                                                                                                                                                                                                                                                                                                                                                                                                                                                                                                                                                                                                                                                                                                                                                                                                                                                                                                                                                                                                                                                                                                                                                                                                                                                                                                                                                                                                                                                                                                                                                                                                                                                                                                                                                                                                                                                                                                                                                                                                                                                                                                                                                                                                                                                                                                                                                                                                                                                                                                                                                                                                                                                                                                                                                                                                                                                                                                                                                                                                                                                                                                                                                                                                                                                                                                                                                                                                                                                                                                                                                                                                                                                                                                                                                                                                                                                                                                                                                                             |
| 3 | ti("Validation Studies" OR "reproducibility of results" OR reproducib* OR "psychometrics" OR psychometr* OR clinimetr* OR clinometr* OR "observer variation" OR observer variation OR "discriminant analysis" OR reliab* OR valid* OR coefficient OR "internal consistency" OR (cronbach* AND (alpha OR alphas)) OR "item correlation" OR "item correlations" OR "item selection" OR "item selections" OR "item reduction" OR "item reductions" OR agreement OR precision OR imprecision OR "precise values" OR test-retest OR (test AND retest) OR (reliab* AND (test OR retest)) OR stability OR interrater OR inter-rater OR intrarater OR intra-rater OR intertester OR inter-tester OR intratester OR intra-tester OR interobserver OR inter-observer OR intraobserver OR intra-observer OR intertechnician OR inter-technician OR intratechnician OR intra-technician OR interexaminer OR inter-examiner OR intraexaminer OR intra-examiner OR interassay OR inter-assay OR intraassay OR intra-assay OR interindividual OR inter-individual OR intraindividual OR intra-individual OR interparticipant OR inter-participant OR intraparticipant OR intra-participant OR kappa OR "kappa's" OR kappas OR "coefficient of variation" OR repeatab* OR ((replicab* OR repeated) AND (measure OR measures OR findings OR result OR results OR test OR tests)) OR generaliza* OR generalisa* OR concordance OR (intraclass AND correlation*) OR discriminative OR "known group" OR "factor analysis" OR "factor analyses" OR "factor structure" OR "factor structure" OR dimensionality OR subscale* OR "multitrait scaling analysis" OR "multitrait scaling analyses" OR "item discriminant" OR "interscale correlation" OR "interscale correlations" OR ((error OR errors) AND (measure* OR correlat* OR evaluat* OR accuracy OR accurate OR precision OR mean)) OR "individual variability" OR "interval variability" OR "rate variability" OR "variability analysis" OR (uncertainty AND (measurement OR measuring)) OR "standard error of measurement" OR sensitiv* OR responsive* OR (limit AND detection) OR "minimal detectable concentration" OR interpretab* OR (small* AND (real OR detectable) AND (change OR difference)) OR "meaningful change" OR "minimal important change" OR "minimal important difference" OR "minimally important change" OR "minimally important difference" OR "minimal detectable change" OR "minimal detectable difference" OR "minimally detectable change" OR "minimally detectable difference" OR "minimal real change" OR "minimal real difference" OR "minimally real change" OR "minimally real difference" OR "ceiling effect" OR "floor effect" OR "Item response model" OR IRT OR Rasch OR "Differential item functioning" OR DIF OR "computer adaptive testing" OR "item bank" OR "cross-cultural equivalence") OR ab("Validation Studies" OR "reproducibility of results" OR reproducib* OR "psychometrics" OR psychometr* OR clinimetr* OR clinometr* OR "observer variation" OR observer variation OR "discriminant analysis" OR reliab* OR valid* OR coefficient OR "internal consistency" OR (cronbach* AND (alpha OR alphas)) OR "item correlation" OR "item correlations" OR "item selection" OR "item selections" OR "item reduction" OR "item reductions" OR agreement OR precision OR imprecision OR "precise values" OR test-retest OR (test AND retest) OR (reliab* AND (test OR retest)) OR stability OR interrater OR inter-rater OR intrarater OR intra-rater OR intertester OR inter-tester OR intratester OR intra-tester OR interobserver OR inter-observer OR intraobserver OR intra-observer OR intertechnician OR inter-technician OR intratechnician OR intra-technician OR interexaminer OR inter-examiner OR intraexaminer OR intra-examiner OR interassay OR inter-assay OR intraassay OR intra-assay OR interindividual OR inter-individual OR intraindividual OR intra-individual OR interparticipant OR inter-participant OR intraparticipant OR intra-participant OR kappa OR "kappa's" OR kappas OR "coefficient of variation" OR repeatab* OR ((replicab* OR repeated) AND (measure OR measures OR findings OR result OR results OR test OR tests)) OR generaliza* OR generalisa* OR concordance OR (intraclass AND correlation*) OR discriminative OR "known group" OR "factor analysis" OR "factor analyses" OR "factor structure" OR "factor structure" OR dimensionality OR subscale* OR "multitrait scaling analysis" OR "multitrait scaling analyses" OR "item discriminant" OR "interscale correlation" OR "interscale correlations" OR ((error OR errors) AND (measure* OR correlat* OR evaluat* OR accuracy OR accurate OR precision OR mean)) OR "individual variability" OR "interval variability" OR "rate variability" OR "variability analysis" OR (uncertainty AND (measurement OR measuring)) OR "standard error of measurement" OR sensitiv* OR responsive* OR (limit AND detection) OR "minimal detectable concentration" OR interpretab* OR (small* AND (real OR detectable) AND (change OR difference)) OR "meaningful change" OR "minimal important change" OR "minimal important difference" OR "minimally important change" OR "minimally important difference" OR "minimal detectable change" OR "minimal detectable difference" OR "minimally detectable change" OR "minimally detectable difference" OR "minimal real change" OR "minimal real difference" OR "minimally real change" OR "minimally real difference" OR "ceiling effect" OR "floor effect" OR "Item response model" OR IRT OR Rasch OR "Differential item functioning" OR DIF OR "computer adaptive testing" OR "item bank" OR "cross-cultural equivalence") |
| 4 | #1 AND #2 AND #3                                                                                                                                                                                                                                                                                                                                                                                                                                                                                                                                                                                                                                                                                                                                                                                                                                                                                                                                                                                                                                                                                                                                                                                                                                                                                                                                                                                                                                                                                                                                                                                                                                                                                                                                                                                                                                                                                                                                                                                                                                                                                                                                                                                                                                                                                                                                                                                                                                                                                                                                                                                                                                                                                                                                                                                                                                                                                                                                                                                                                                                                                                                                                                                                                                                                                                                                                                                                                                                                                                                                                                                                                                                                                                                                                                                                                                                                                                                                                                                                                                                                                                                                                                                                                                                                                                                                                                                                                                                                                                                                                                                                                                                                                                                                                                                                                                                                                                                                                                                                                                                                                                                                                                                                                                                                                                                                                                                                                                                                                                                                                                                                                                                                                                                         |
| 5 | ti(Systematic Review) OR ab(Systematic Review)                                                                                                                                                                                                                                                                                                                                                                                                                                                                                                                                                                                                                                                                                                                                                                                                                                                                                                                                                                                                                                                                                                                                                                                                                                                                                                                                                                                                                                                                                                                                                                                                                                                                                                                                                                                                                                                                                                                                                                                                                                                                                                                                                                                                                                                                                                                                                                                                                                                                                                                                                                                                                                                                                                                                                                                                                                                                                                                                                                                                                                                                                                                                                                                                                                                                                                                                                                                                                                                                                                                                                                                                                                                                                                                                                                                                                                                                                                                                                                                                                                                                                                                                                                                                                                                                                                                                                                                                                                                                                                                                                                                                                                                                                                                                                                                                                                                                                                                                                                                                                                                                                                                                                                                                                                                                                                                                                                                                                                                                                                                                                                                                                                                                                           |
| 5 | #4 AND #5                                                                                                                                                                                                                                                                                                                                                                                                                                                                                                                                                                                                                                                                                                                                                                                                                                                                                                                                                                                                                                                                                                                                                                                                                                                                                                                                                                                                                                                                                                                                                                                                                                                                                                                                                                                                                                                                                                                                                                                                                                                                                                                                                                                                                                                                                                                                                                                                                                                                                                                                                                                                                                                                                                                                                                                                                                                                                                                                                                                                                                                                                                                                                                                                                                                                                                                                                                                                                                                                                                                                                                                                                                                                                                                                                                                                                                                                                                                                                                                                                                                                                                                                                                                                                                                                                                                                                                                                                                                                                                                                                                                                                                                                                                                                                                                                                                                                                                                                                                                                                                                                                                                                                                                                                                                                                                                                                                                                                                                                                                                                                                                                                                                                                                                                |
| 6 | ti("protocol" OR "addresses" OR "biography" OR "case reports" OR "comment" OR "directory" OR "editorial" OR "festschrift" OR "interview" OR "lectures" OR "legal cases" OR "legislation" OR "letter" OR "news" OR "newspaper article" OR "patient education handout" OR "popular works" OR "congresses" OR "consensus development conference" OR "consensus development conference" OR "practice guideline")                                                                                                                                                                                                                                                                                                                                                                                                                                                                                                                                                                                                                                                                                                                                                                                                                                                                                                                                                                                                                                                                                                                                                                                                                                                                                                                                                                                                                                                                                                                                                                                                                                                                                                                                                                                                                                                                                                                                                                                                                                                                                                                                                                                                                                                                                                                                                                                                                                                                                                                                                                                                                                                                                                                                                                                                                                                                                                                                                                                                                                                                                                                                                                                                                                                                                                                                                                                                                                                                                                                                                                                                                                                                                                                                                                                                                                                                                                                                                                                                                                                                                                                                                                                                                                                                                                                                                                                                                                                                                                                                                                                                                                                                                                                                                                                                                                                                                                                                                                                                                                                                                                                                                                                                                                                                                                                             |
| 7 | #5 NOT #6                                                                                                                                                                                                                                                                                                                                                                                                                                                                                                                                                                                                                                                                                                                                                                                                                                                                                                                                                                                                                                                                                                                                                                                                                                                                                                                                                                                                                                                                                                                                                                                                                                                                                                                                                                                                                                                                                                                                                                                                                                                                                                                                                                                                                                                                                                                                                                                                                                                                                                                                                                                                                                                                                                                                                                                                                                                                                                                                                                                                                                                                                                                                                                                                                                                                                                                                                                                                                                                                                                                                                                                                                                                                                                                                                                                                                                                                                                                                                                                                                                                                                                                                                                                                                                                                                                                                                                                                                                                                                                                                                                                                                                                                                                                                                                                                                                                                                                                                                                                                                                                                                                                                                                                                                                                                                                                                                                                                                                                                                                                                                                                                                                                                                                                                |
| 8 | FILTER: Language (English)                                                                                                                                                                                                                                                                                                                                                                                                                                                                                                                                                                                                                                                                                                                                                                                                                                                                                                                                                                                                                                                                                                                                                                                                                                                                                                                                                                                                                                                                                                                                                                                                                                                                                                                                                                                                                                                                                                                                                                                                                                                                                                                                                                                                                                                                                                                                                                                                                                                                                                                                                                                                                                                                                                                                                                                                                                                                                                                                                                                                                                                                                                                                                                                                                                                                                                                                                                                                                                                                                                                                                                                                                                                                                                                                                                                                                                                                                                                                                                                                                                                                                                                                                                                                                                                                                                                                                                                                                                                                                                                                                                                                                                                                                                                                                                                                                                                                                                                                                                                                                                                                                                                                                                                                                                                                                                                                                                                                                                                                                                                                                                                                                                                                                                               |
| 9 | FILTER: Period (2008-2018)                                                                                                                                                                                                                                                                                                                                                                                                                                                                                                                                                                                                                                                                                                                                                                                                                                                                                                                                                                                                                                                                                                                                                                                                                                                                                                                                                                                                                                                                                                                                                                                                                                                                                                                                                                                                                                                                                                                                                                                                                                                                                                                                                                                                                                                                                                                                                                                                                                                                                                                                                                                                                                                                                                                                                                                                                                                                                                                                                                                                                                                                                                                                                                                                                                                                                                                                                                                                                                                                                                                                                                                                                                                                                                                                                                                                                                                                                                                                                                                                                                                                                                                                                                                                                                                                                                                                                                                                                                                                                                                                                                                                                                                                                                                                                                                                                                                                                                                                                                                                                                                                                                                                                                                                                                                                                                                                                                                                                                                                                                                                                                                                                                                                                                               |

## S2. Characteristics and references of studies.

| ID | Year | Author            | Title                                                                                                                                                                                                          | Type of review                                                                                            | Instruments assessed | Number Instruments        | Measurement Properties |
|----|------|-------------------|----------------------------------------------------------------------------------------------------------------------------------------------------------------------------------------------------------------|-----------------------------------------------------------------------------------------------------------|----------------------|---------------------------|------------------------|
| 1  | 2008 | Barbosa & Gaviao  | Oral health-related quality of life in children: Part III. Is there agreement between parents in rating their children's oral health-related quality of life? A systematic review                              | Studies on the quality of all available validated instruments to measure HRQoL in a particular population | Both                 | More than two instruments | One specific property  |
| 2  | 2008 | Basra et al       | The Dermatology Life Quality Index 1994–2007: a comprehensive review of validation data and clinical results                                                                                                   | Studies on the quality of one instrument to measures HRQoL in general population                          | Disease-specific     | One instrument            | Multiple properties    |
| 3  | 2008 | Carabin et al     | Quality of life measurement tools for people living with HIV/AIDS.                                                                                                                                             | Studies on the quality of all available validated instruments to measure HRQoL in a particular population | Both                 | More than two instruments | Multiple properties    |
| 4  | 2008 | Chassany et al    | Systematic review: health-related quality of life (HRQOL) questionnaires in gastro-oesophageal reflux disease.                                                                                                 | Studies on the quality of all available validated instruments to measure HRQoL in a particular population | Both                 | More than two instruments | Multiple properties    |
| 5  | 2008 | El Achhab et al   | Disease-specific health-related quality of life instruments among adults diabetic: a systematic review.                                                                                                        | Studies on the quality of a selection of instruments to measure HRQoL in a particular population          | Disease-specific     | More than two instruments | Multiple properties    |
| 6  | 2008 | Finger et al      | Quality of life in age-related macular degeneration: a review of available vision-specific psychometric tools.                                                                                                 | Studies on the quality of a selection of instruments to measure HRQoL in a particular population          | Disease-specific     | More than two instruments | Multiple properties    |
| 7  | 2008 | Franic & Bothe    | Psychometric evaluation of condition-specific instruments used to assess health-related, quality of life, attitudes, and related constructs in stuttering                                                      | Studies on the quality of a selection of instruments to measure HRQoL in a particular population          | Disease-specific     | More than two instruments | Multiple properties    |
| 8  | 2008 | Janssens et al    | Health-related quality-of-life measures for long-term follow-up in children after major trauma.                                                                                                                | Studies on the quality of all available validated instruments to measure HRQoL in a particular population | Generic              | More than two instruments | Multiple properties    |
| 9  | 2008 | Klassen et al     | Clinical research in Pediatric plastic surgery and Systematic review of quality of life questionnaires                                                                                                         | Studies on the quality of a selection of instruments to measure HRQoL in a particular population          | Disease-specific     | More than two instruments | Multiple properties    |
| 10 | 2008 | Kluivers et al    | Systematic review on recovery specific quality of life instruments                                                                                                                                             | Studies on the quality of a selection of instruments to measure HRQoL in a particular population          | Disease-specific     | More than two instruments | Multiple properties    |
| 11 | 2008 | Langham et al     | Health-related quality of life instruments in studies of adult men with testosterone deficiency syndrome: a critical assessment.                                                                               | Studies on the quality of all available validated instruments to measure HRQoL in a particular population | Both                 | More than two instruments | Multiple properties    |
| 12 | 2008 | Pearce et al      | Measuring quality of life in cancer survivors: a methodological review of existing scales                                                                                                                      | Studies on the quality of a selection of instruments to measure HRQoL in a particular population          | Disease-specific     | More than two instruments | Multiple properties    |
| 13 | 2008 | Price et al       | Measures of functional status and quality-of-life in schizophrenia                                                                                                                                             | Studies on the quality of all available validated instruments to measure HRQoL in a particular population | Both                 | More than two instruments | Multiple properties    |
| 14 | 2008 | Quittner et al    | Systematic review of health-related quality of life measures for children with respiratory conditions.                                                                                                         | Studies on the quality of a selection of instruments to measure HRQoL in a particular population          | Disease-specific     | More than two instruments | Multiple properties    |
| 15 | 2008 | Reaney et al      | Understanding and assessing the impact of alcoholism on quality of life. A systematic review of the content validity of instruments used to assess health related quality of life in alcoholism                | Studies on the quality of all available validated instruments to measure HRQoL in a particular population | Both                 | More than two instruments | One specific property  |
| 16 | 2008 | Schalarman et al  | The use of health-related quality of life (HRQOL) in children and adolescents as an outcome criterion to evaluate family oriented support for young carers in Germany: an integrative review of the literature | Studies on the quality of all available validated instruments to measure HRQoL in a particular population | Generic              | More than two instruments | Multiple properties    |
| 17 | 2008 | Solans et al      | Health-related quality of life measurement in children and adolescents: A systematic review of generic and disease-specific instruments.                                                                       | Studies on the quality of all available validated instruments to measure HRQoL in a particular population | Both                 | More than two instruments | Multiple properties    |
| 18 | 2008 | Tschiesner et al  | Content comparison of quality of life questionnaires used in head and neck cancer based on the international classification of functioning, disability and health: a systematic review.                        | Studies on the quality of a selection of instruments to measure HRQoL in a particular population          | Disease-specific     | More than two instruments | One specific property  |
| 19 | 2008 | Upton et al       | Parent-child agreement across child health-related quality of life instruments: a review of the literature.                                                                                                    | Studies on the quality of all available validated instruments to measure HRQoL in a particular population | Both                 | More than two instruments | Multiple properties    |
| 20 | 2009 | Davies N.         | Measuring health-related quality of life in cancer patients.                                                                                                                                                   | Studies on the quality of all available validated instruments to measure HRQoL in a particular population | Both                 | More than two instruments | Multiple properties    |
| 21 | 2009 | Derret et al      | Outcome after injury-a systematic literature search of studies using the EQ-5D                                                                                                                                 | Studies on the quality of one instrument to measures HRQoL in general population                          | Generic              | One instrument            | Multiple properties    |
| 22 | 2009 | Epton et al       | Quality of life in amyotrophic lateral sclerosis/motor neuron disease: a structured review.                                                                                                                    | Studies on the quality of all available validated instruments to measure HRQoL in a particular population | Both                 | More than two instruments | Multiple properties    |
| 23 | 2009 | Fitzsimmons et al | A systematic review of the use and validation of health-related quality of life instruments in older cancer patients.                                                                                          | Studies on the quality of all available validated instruments to measure HRQoL in a particular population | Both                 | More than two instruments | Multiple properties    |
| 24 | 2009 | Garin et al       | Disease-specific health-related quality of life questionnaires for heart failure: A systematic review with meta-analyses.                                                                                      | Studies on the quality of a selection of instruments to measure HRQoL in a particular population          | Disease-specific     | More than two instruments | Multiple properties    |

| ID | Year | Author              | Title                                                                                                                                                                                                                  | Type of review                                                                                            | Instruments assessed | Number Instruments        | Measurement Properties |
|----|------|---------------------|------------------------------------------------------------------------------------------------------------------------------------------------------------------------------------------------------------------------|-----------------------------------------------------------------------------------------------------------|----------------------|---------------------------|------------------------|
| 25 | 2009 | Garvie et al        | Quality of life measurement in paediatric and adolescent populations with HIV: A review of the literature                                                                                                              | Studies on the quality of all available validated instruments to measure HRQoL in a particular population | Both                 | More than two instruments | Multiple properties    |
| 26 | 2009 | Guo et al           | Measuring health-related quality of life in tuberculosis: a systematic review.                                                                                                                                         | Studies on the quality of all available validated instruments to measure HRQoL in a particular population | Both                 | More than two instruments | Multiple properties    |
| 27 | 2009 | Jay et al           | A review of quality of life instruments used in liver transplantation.                                                                                                                                                 | Studies on the quality of all available validated instruments to measure HRQoL in a particular population | Both                 | More than two instruments | Multiple properties    |
| 28 | 2009 | Speight et al       | Not all roads lead to Rome-a review of quality of life measurement in adults with diabetes.                                                                                                                            | Studies on the quality of all available validated instruments to measure HRQoL in a particular population | Both                 | More than two instruments | Multiple properties    |
| 29 | 2009 | Street et al        | Health related quality of life assessment in metastatic disease of the spine: a systematic review.                                                                                                                     | Studies on the quality of all available validated instruments to measure HRQoL in a particular population | Both                 | More than two instruments | One specific property  |
| 30 | 2009 | Waters et al        | Quality of life instruments for children and adolescents with neurodisabilities: How to choose the appropriate instrument.                                                                                             | Studies on the quality of all available validated instruments to measure HRQoL in a particular population | Both                 | More than two instruments | Multiple properties    |
| 31 | 2009 | Wettergren et al    | The use, feasibility and psychometric properties of an individualised quality-of-life instrument: A systematic review of the SEIQoL-DW.                                                                                | Studies on the quality of one instrument to measures HRQoL in general population                          | Generic              | One instrument            | Multiple properties    |
| 32 | 2010 | Albers et al        | Evaluation of quality-of-life measures for use in palliative care: a systematic review.                                                                                                                                | Studies on the quality of all available validated instruments to measure HRQoL in a particular population | Both                 | More than two instruments | Multiple properties    |
| 33 | 2010 | Branski et al       | Measuring quality of life in dysphonic patients: a systematic review of content development in patient-reported outcomes measures.                                                                                     | Studies on the quality of a selection of instruments to measure HRQoL in a particular population          | Disease-specific     | More than two instruments | Multiple properties    |
| 34 | 2010 | Bronsard et al      | What are the best outcome measures for assessing quality of life in plaque type psoriasis? A systematic review of the literature.                                                                                      | Studies on the quality of all available validated instruments to measure HRQoL in a particular population | Both                 | More than two instruments | Multiple properties    |
| 35 | 2010 | Carlon et al        | A systematic review of the psychometric properties of Quality of life measures for school children with cerebral palsy                                                                                                 | Studies on the quality of a selection of instruments to measure HRQoL in a particular population          | Disease-specific     | More than two instruments | Multiple properties    |
| 36 | 2010 | Chen et al          | Measuring Quality of Life in Oncologic Breast Surgery: A Systematic Review of Patient-Reported Outcome Measures.                                                                                                       | Studies on the quality of all available validated instruments to measure HRQoL in a particular population | Both                 | More than two instruments | Multiple properties    |
| 37 | 2010 | Forhan et al        | A systematic review of the quality of psychometric evidence supporting the use of an obesity-specific quality of life measure for use with persons who have class III obesity: Diagnostic in Obesity and Complications | Studies on the quality of one instrument to measures HRQoL in a particular population                     | Disease-specific     | One instrument            | Multiple properties    |
| 38 | 2010 | Danquah et al       | Quality of life measures for patients on hemodialysis: a review of psychometric properties.                                                                                                                            | Studies on the quality of all available validated instruments to measure HRQoL in a particular population | Both                 | More than two instruments | Multiple properties    |
| 39 | 2010 | Hill et al          | Quality of life instruments and definitions in individuals with spinal cord injury: a systematic review.                                                                                                               | Studies on the quality of all available validated instruments to measure HRQoL in a particular population | Both                 | More than two instruments | Multiple properties    |
| 40 | 2010 | Kamalski et al      | Measuring disease-specific health-related quality of life to evaluate treatment outcomes in tinnitus patients: a systematic review.                                                                                    | Studies on the quality of a selection of instruments to measure HRQoL in a particular population          | Disease-specific     | More than two instruments | Multiple properties    |
| 41 | 2010 | Klassen et al       | Quality of life questionnaires for children with cancer and childhood cancer survivors: a review of the development of available measures                                                                              | Studies on the quality of all available validated instruments to measure HRQoL in a particular population | Both                 | More than two instruments | Multiple properties    |
| 42 | 2010 | Kwon et al          | Quality of life of women with urinary incontinence: a systematic literature review.                                                                                                                                    | Studies on the quality of all available validated instruments to measure HRQoL in a particular population | Both                 | More than two instruments | Multiple properties    |
| 43 | 2010 | Luckett et al       | Assessing health-related quality of life in gynecologic oncology: a systematic review of questionnaires and their ability to detect clinically important differences and change.                                       | Studies on the quality of all available validated instruments to measure HRQoL in a particular population | Both                 | More than two instruments | Multiple properties    |
| 44 | 2010 | Palfreyman et al    | Assessing current health-related quality of life questionnaires administered to patients with venous ulcers: Can they be used in economic evaluations?                                                                 | Studies on the quality of all available validated instruments to measure HRQoL in a particular population | Both                 | More than two instruments | Multiple properties    |
| 45 | 2010 | Palfreyman et al    | A systematic review of health-related quality of life instruments used for people with venous ulcers: an assessment of their suitability and psychometric properties.                                                  | Studies on the quality of all available validated instruments to measure HRQoL in a particular population | Both                 | More than two instruments | Multiple properties    |
| 46 | 2010 | Passarelli et al    | Validity Studies of Quality of Life Instruments for Eating Disorders                                                                                                                                                   | Studies on the quality of a selection of instruments to measure HRQoL in a particular population          | Disease-specific     | More than two instruments | Multiple properties    |
| 47 | 2010 | Riordain & McCreary | The use of quality of life measures in oral medicine: A review of the literature                                                                                                                                       | Studies on the quality of all available validated instruments to measure HRQoL in general population      | Both                 | More than two instruments | Multiple properties    |
| 48 | 2010 | Speight & Howarth   | Quality of life in restless legs syndrome: A systematic review of clinical trials and a critical review of instruments.                                                                                                | Studies on the quality of a selection of instruments to measure HRQoL in a particular population          | Disease-specific     | More than two instruments | Multiple properties    |
| 49 | 2010 | Street et al        | Introducing a New Health Related Quality of Life Outcome tool for metastatic disease of the spine                                                                                                                      | Studies on the quality of all available validated instruments to measure HRQoL in a particular population | Both                 | More than two instruments | One specific property  |

| ID | Year | Author                 | Title                                                                                                                                                                                                              | Type of review                                                                                            | Instruments assessed | Number Instruments            | Measurement Properties |
|----|------|------------------------|--------------------------------------------------------------------------------------------------------------------------------------------------------------------------------------------------------------------|-----------------------------------------------------------------------------------------------------------|----------------------|-------------------------------|------------------------|
| 50 | 2010 | Zeng et al             | Quality of life measurement in women with cervical cancer: implications for Chinese cervical cancer survivors                                                                                                      | Studies on the quality of all available validated instruments to measure HRQoL in a particular population | Both                 | More than two instruments     | Multiple properties    |
| 51 | 2011 | Carlton & Kaltenthaler | Health-related quality of life measures (HRQoL) in patients with amblyopia and strabismus: a systematic review.                                                                                                    | Studies on the quality of a selection of instruments to measure HRQoL in a particular population          | Disease-specific     | More than two instruments     | Multiple properties    |
| 52 | 2011 | Carlton & Kaltenthaler | Amblyopia and quality of life: a systematic review                                                                                                                                                                 | Studies on the quality of all available validated instruments to measure HRQoL in a particular population | Both                 | More than two instruments     | Multiple properties    |
| 53 | 2011 | da Silva et al         | Quality of life assessment after Acute Coronary Syndrome: Systematic Review                                                                                                                                        | Studies on the quality of all available validated instruments to measure HRQoL in a particular population | Both                 | More than two instruments     | Multiple properties    |
| 54 | 2011 | Eckstein et al         | Measuring Quality of Life in Cleft Lip and Palate patients: currently available patient reported outcomes                                                                                                          | Studies on the quality of a selection of instruments to measure HRQoL in a particular population          | Disease-specific     | More than two instruments     | Multiple properties    |
| 55 | 2011 | Fayed et al            | Health status and QOL instruments used in childhood cancer research: deciphering conceptual content using World Health Organization definitions                                                                    | Studies on the quality of all available validated instruments to measure HRQoL in a particular population | Both                 | More than two instruments     | One specific property  |
| 56 | 2011 | Glover et al           | Understanding and assessing the impact of End-Stage renal disease on QOL. A systematic review of the content validity...                                                                                           | Studies on the quality of all available validated instruments to measure HRQoL in a particular population | Both                 | More than two instruments     | One specific property  |
| 57 | 2011 | Hounsoms et al         | EQ-5D as a Quality of Life measure in people with dementia and their carers: evidence and key issues                                                                                                               | Studies on the quality of one instrument to measure HRQoL in a particular population                      | Generic              | One instrument                | Multiple properties    |
| 58 | 2011 | Janssen et al          | The use of the EQ-5D preference based health status measure in adults with type 2 diabetes mellitus                                                                                                                | Studies on the quality of one instrument to measure HRQoL in a particular population                      | Generic              | One instrument                | Multiple properties    |
| 59 | 2011 | Kowal- Bielecka        | Analysis of the validation status of WOL and Functional measures in Pulmonary Arterial Hypertension.                                                                                                               | Studies on the quality of a selection of instruments to measure HRQoL in a particular population          | Both                 | Comparison of two instruments | Multiple properties    |
| 60 | 2011 | Lien et al             | Comparison of the EORTC QLQ-C15-PAL and the FACIT-Pal for assessment of quality of life in patients with advanced cancer                                                                                           | Studies on the quality of a selection of instruments to measure HRQoL in a particular population          | Disease-specific     | Comparison of two instruments | One specific property  |
| 61 | 2011 | Luckett et al          | Choosing between the EORTC QLQ-C30 and FACT for measuring health related quality of life in cancer clinical research: issues, evidence and recommendations                                                         | Studies on the quality of a selection of instruments to measure HRQoL in a particular population          | Disease-specific     | Comparison of two instruments | Multiple properties    |
| 62 | 2011 | Mordiffi et al         | Quality of life tools for adult patients with cancer undergoing chemotherapy: a systematic review                                                                                                                  | Studies on the quality of a selection of instruments to measure HRQoL in a particular population          | Disease-specific     | More than two instruments     | Multiple properties    |
| 63 | 2011 | Noyes et al            | EQ-5D for the Assessment of Health-Related Quality of Life and Resource Allocation in Children: A Systematic Methodological Review                                                                                 | Studies on the quality of one instrument to measure HRQoL in a particular population                      | Generic              | One instrument                | Multiple properties    |
| 64 | 2011 | Papaioannou et al      | How valid and responsive are generic health status measures, such as EQ-5D and SF-36, in schizophrenia? A systematic review.                                                                                       | Studies on the quality of a selection of instruments to measure HRQoL in a particular population          | Generic              | More than two instruments     | Multiple properties    |
| 65 | 2011 | Reavey et al           | Measuring quality of life and patient satisfaction after body contouring: a systematic review of patient-reported outcome measures.                                                                                | Studies on the quality of a selection of instruments to measure HRQoL in a particular population          | Disease-specific     | More than two instruments     | Multiple properties    |
| 66 | 2011 | Schiarti et al         | Content comparison of health-related quality of life measures for cerebral palsy based on the International Classification of Functioning Quality of life in people with venous leg ulcers: an integrative review. | Studies on the quality of all available validated instruments to measure HRQoL in a particular population | Both                 | More than two instruments     | One specific property  |
| 67 | 2011 | Tayyem et al           | Analysis of Health-Related quality of life instruments measuring the impact of bariatric surgery: systematic review of instruments and their content validity                                                      | Studies on the quality of all available validated instruments to measure HRQoL in a particular population | Both                 | More than two instruments     | One specific property  |
| 68 | 2011 | Virginia et al         | Quality of life in people with venous leg ulcers: an integrative review                                                                                                                                            | Studies on the quality of all available validated instruments to measure HRQoL in a particular population | Both                 | More than two instruments     | Multiple properties    |
| 69 | 2011 | Whitehurst et al       | Systematic review and empirical comparison of contemporaneous EQ-5D and SF-6D group mean scores                                                                                                                    | Studies on the quality of a selection of instruments to measure HRQoL in general population               | Generic              | Comparison of two instruments | One specific property  |
| 70 | 2011 | Wilson et al           | Spinal cord injury and quality of life: a systematic review of outcome measures                                                                                                                                    | Studies on the quality of all available validated instruments to measure HRQoL in a particular population | Both                 | More than two instruments     | Multiple properties    |
| 71 | 2012 | Bhatt et al            | Health outcome measures for diabetes mellitus: a review                                                                                                                                                            | Studies on the quality of a selection of instruments to measure HRQoL in a particular population          | Disease-specific     | More than two instruments     | Multiple properties    |
| 72 | 2012 | Chopra & Kamal         | A systematic review of quality of life instruments in long-term breast cancer survivors.                                                                                                                           | Studies on the quality of a selection of instruments to measure HRQoL in a particular population          | Disease-specific     | More than two instruments     | Multiple properties    |
| 73 | 2012 | Cormier et al          | Health related quality of life in patients with melanoma. Overview of instruments and outcomes                                                                                                                     | Studies on the quality of all available validated instruments to measure HRQoL in a particular population | Both                 | More than two instruments     | Multiple properties    |
| 74 | 2012 | Correia & De Carlo     | Evaluation of quality of life in a palliative care context: an integrative literature review.                                                                                                                      | Studies on the quality of all available validated instruments to measure HRQoL in a particular population | Both                 | More than two instruments     | Multiple properties    |

| ID | Year | Author               | Title                                                                                                                                                              | Type of review                                                                                            | Instruments assessed | Number Instruments            | Measurement Properties |
|----|------|----------------------|--------------------------------------------------------------------------------------------------------------------------------------------------------------------|-----------------------------------------------------------------------------------------------------------|----------------------|-------------------------------|------------------------|
| 75 | 2012 | Gräske et al         | Dementia-Specific Quality of Life Instruments and Their Appropriateness in Shared-Housing Arrangements--A Literature Study.                                        | Studies on the quality of a selection of instruments to measure HRQoL in a particular population          | Disease-specific     | More than two instruments     | Multiple properties    |
| 76 | 2012 | Ho et al             | Measuring Quality of life and patient satisfaction in facial paralysis patients: a systematic review of patient reported outcome measures                          | Studies on the quality of a selection of instruments to measure HRQoL in a particular population          | Disease-specific     | More than two instruments     | Multiple properties    |
| 77 | 2012 | Hogg et al           | Measures of health related quality of life in diabetes-related foot disease: a systematic review                                                                   | Studies on the quality of all available validated instruments to measure HRQoL in a particular population | Both                 | More than two instruments     | Multiple properties    |
| 78 | 2012 | Luquiens et al       | Quality of life among alcohol-dependent patients: how satisfactory are the available instruments? A systematic review                                              | Studies on the quality of all available validated instruments to measure HRQoL in a particular population | Both                 | More than two instruments     | Multiple properties    |
| 79 | 2012 | Madureira et al      | Quality of life measurements in patients with osteoporosis and fractures                                                                                           | Studies on the quality of all available validated instruments to measure HRQoL in a particular population | Both                 | More than two instruments     | Multiple properties    |
| 80 | 2012 | Milne et al          | Measuring Health-Related Quality of Life for Patients with Diabetic Retinopathy                                                                                    | Studies on the quality of all available validated instruments to measure HRQoL in a particular population | Both                 | More than two instruments     | Multiple properties    |
| 81 | 2012 | Ojo et al            | A Systematic Review of Head and Neck Cancer Quality of Life Assessment Instruments                                                                                 | Studies on the quality of a selection of instruments to measure HRQoL in a particular population          | Disease-specific     | More than two instruments     | Multiple properties    |
| 82 | 2012 | Popovic et al        | Comparison of the EORTC QLQ-BM22 and the FACT-BP for assessment of quality of life in cancer patients with bone metastases                                         | Studies on the quality of a selection of instruments to measure HRQoL in a particular population          | Disease-specific     | Comparison of two instruments | Multiple properties    |
| 83 | 2012 | Quintanilla et al    | Comparison of disease-specific quality of life instruments in the assessment of chronic rhinosinusitis                                                             | Studies on the quality of a selection of instruments to measure HRQoL in a particular population          | Disease-specific     | More than two instruments     | Multiple properties    |
| 84 | 2012 | Rajmil et al         | Health-related quality of life measurement in children and adolescents in Ibero-American countries, 2000 to 2010.                                                  | Studies on the quality of a selection of instruments to measure HRQoL in a particular population          | Both                 | More than two instruments     | Multiple properties    |
| 85 | 2012 | Shin & Shin          | Measurement of quality of life in menopausal women: a systematic review.                                                                                           | Studies on the quality of a selection of instruments to measure HRQoL in a particular population          | Disease-specific     | More than two instruments     | Multiple properties    |
| 86 | 2012 | Smith et al          | Measuring health-related quality of life in diabetic peripheral neuropathy: a systematic review.                                                                   | Studies on the quality of a selection of instruments to measure HRQoL in a particular population          | Disease-specific     | More than two instruments     | Multiple properties    |
| 87 | 2012 | Tosh et al           | A review of generic preference-based measures of health-related quality of life in visual disorders.                                                               | Studies on the quality of all available validated instruments to measure HRQoL in a particular population | Generic              | More than two instruments     | Multiple properties    |
| 88 | 2012 | Townsend-White et al | Review: a systematic review of quality of life measures for people with intellectual disabilities and challenging behaviours                                       | Studies on the quality of all available validated instruments to measure HRQoL in a particular population | Generic              | More than two instruments     | Multiple properties    |
| 89 | 2012 | Walker et al         | Are they worth it? A systematic review of QOL instruments for use with mentally disordered offenders                                                               | Studies on the quality of all available validated instruments to measure HRQoL in a particular population | Both                 | More than two instruments     | Multiple properties    |
| 90 | 2012 | Whitehurst et al     | A review of preference-based health-related quality of life questionnaires in spinal cord injury research.                                                         | Studies on the quality of all available validated instruments to measure HRQoL in a particular population | Generic              | More than two instruments     | Multiple properties    |
| 91 | 2012 | Yip et al            | Reliability, validity and feasibility of quality of life instruments for adult patients with cancer undergoing chemotherapy: Result from a systematic review.      | Studies on the quality of a selection of instruments to measure HRQoL in a particular population          | Disease-specific     | More than two instruments     | Multiple properties    |
| 92 | 2013 | Al Sayah et al       | Health related quality of life measures in Arabic speaking populations: A systematic review on cross-cultural adaptation and measurement properties                | Studies on the quality of all available validated instruments to measure HRQoL in a particular population | Generic              | More than two instruments     | Multiple properties    |
| 93 | 2013 | Basra et al          | Infants' Dermatitis Quality of Life Index: a decade of experience of validation and clinical application.                                                          | Studies on the quality of one instrument to measure HRQoL in a particular population                      | Disease-specific     | One instrument                | Multiple properties    |
| 94 | 2013 | Castelino et al      | Comparison of the psychometric properties of health-related quality of life measures used in adults with systemic lupus erythematosus: a review of the literature. | Studies on the quality of all available validated instruments to measure HRQoL in a particular population | Both                 | More than two instruments     | Multiple properties    |
| 95 | 2013 | Chandratne et al     | Health-related quality of life in gout: a systematic review.                                                                                                       | Studies on the quality of all available validated instruments to measure HRQoL in a particular population | Both                 | More than two instruments     | Multiple properties    |
| 96 | 2013 | Chow et al           | Condition-specific quality of life questionnaires for caregivers of children with pediatric conditions: A systematic review.                                       | Studies on the quality of a selection of instruments to measure HRQoL in a particular population          | Disease-specific     | More than two instruments     | Multiple properties    |
| 97 | 2013 | Davis et al          | A review of the psychometric performance of the EQ-5D in people with urinary incontinence.                                                                         | Studies on the quality of one instrument to measure HRQoL in a particular population                      | Generic              | One instrument                | Multiple properties    |
| 98 | 2013 | de Almeida et al     | Quality of life instruments for skull base pathology: Systematic review and methodologic appraisal                                                                 | Studies on the quality of a selection of instruments to measure HRQoL in a particular population          | Disease-specific     | More than two instruments     | Multiple properties    |
| 99 | 2013 | Djan et al           | A systematic review of questionnaires to measure the impact of appearance on quality of life for head and neck cancer patients.                                    | Studies on the quality of a selection of instruments to measure HRQoL in a particular population          | Both                 | More than two instruments     | Multiple properties    |



| ID  | Year | Author           | Title                                                                                                                                                                                                                        | Type of review                                                                                            | Instruments assessed | Number Instruments        | Measurement Properties |
|-----|------|------------------|------------------------------------------------------------------------------------------------------------------------------------------------------------------------------------------------------------------------------|-----------------------------------------------------------------------------------------------------------|----------------------|---------------------------|------------------------|
| 100 | 2013 | Gakhar et al     | Health-related quality of life assessment after antiretroviral therapy: A review of the literature                                                                                                                           | Studies on the quality of all available validated instruments to measure HRQoL in a particular population | Both                 | More than two instruments | Multiple properties    |
| 101 | 2013 | Hitzig et al     | Identifying and classifying quality-of-life tools for assessing pressure ulcers after spinal cord injury.                                                                                                                    | Studies on the quality of all available validated instruments to measure HRQoL in a particular population | Both                 | More than two instruments | Multiple properties    |
| 102 | 2013 | Jabir et al      | Assessing Improvement in Quality of Life and Patient Satisfaction following Body Contouring Surgery in Patients with Massive Weight Loss: A Critical Review of Outcome Measures Employed.                                    | Studies on the quality of all available validated instruments to measure HRQoL in a particular population | Both                 | More than two instruments | Multiple properties    |
| 103 | 2013 | Lee et al        | A systematic review of patient-reported outcome instruments of nonmelanoma skin cancer in the dermatologic population                                                                                                        | Studies on the quality of a selection of instruments to measure HRQoL in a particular population          | Both                 | More than two instruments | Multiple properties    |
| 104 | 2013 | Levterova et al  | Instruments for disease-specific quality-of-life measurement in patients with type 2 diabetes mellitus--a systematic review.                                                                                                 | Studies on the quality of a selection of instruments to measure HRQoL in a particular population          | Disease-specific     | More than two instruments | Multiple properties    |
| 105 | 2013 | Li et al         | Psychometric properties of self-reported quality of life measures for people with intellectual disabilities: A systematic review.                                                                                            | Studies on the quality of all available validated instruments to measure HRQoL in a particular population | Both                 | More than two instruments | Multiple properties    |
| 106 | 2013 | Lin et al        | Evaluation of content on EQ-5D as compared to disease-specific utility measures.                                                                                                                                             | Studies on the quality of a selection of instruments to measure HRQoL in a particular population          | Both                 | More than two instruments | One specific property  |
| 107 | 2013 | Mitera et al     | Quality of life measures used in radiation therapy trials for patients with metastatic spinal cord compression (MSCC)                                                                                                        | Studies on the quality of all available validated instruments to measure HRQoL in a particular population | Both                 | More than two instruments | Multiple properties    |
| 108 | 2013 | Mogos et al      | A Systematic Review of Quality of Life Measures in Pregnant and Postpartum Mothers.                                                                                                                                          | Studies on the quality of all available validated instruments to measure HRQoL in a particular population | Both                 | More than two instruments | Multiple properties    |
| 109 | 2013 | Mousavi et al    | Assessment of Questionnaires Measuring Quality of Life in Infertile Couples: A Systematic Review.                                                                                                                            | Studies on the quality of all available validated instruments to measure HRQoL in a particular population | Both                 | More than two instruments | One specific property  |
| 110 | 2013 | Moyle et al      | Health-related quality of life in older people with severe dementia: challenges for measurement and management                                                                                                               | Studies on the quality of all available validated instruments to measure HRQoL in a particular population | Both                 | More than two instruments | Multiple properties    |
| 111 | 2013 | Muzzatti et al   | Assessing quality of life in long-term cancer survivors: a review of available tools.                                                                                                                                        | Studies on the quality of all available validated instruments to measure HRQoL in a particular population | Both                 | More than two instruments | Multiple properties    |
| 112 | 2013 | Paltzer et al    | Measuring the health-related quality of life (HRQoL) of young children in resource-limited settings: a review of existing measures.                                                                                          | Studies on the quality of all available validated instruments to measure HRQoL in a particular population | Both                 | More than two instruments | One specific property  |
| 113 | 2013 | Perales et al    | Health-related quality-of-life instruments for Alzheimer's disease and mixed dementia.                                                                                                                                       | Studies on the quality of a selection of instruments to measure HRQoL in a particular population          | Disease-specific     | More than two instruments | Multiple properties    |
| 114 | 2013 | Pusic et al      | Quality of life among breast cancer patients with lymphedema: A systematic review of patient-reported outcome instruments and outcomes.                                                                                      | Studies on the quality of all available validated instruments to measure HRQoL in a particular population | Both                 | More than two instruments | Multiple properties    |
| 115 | 2013 | Roncada et al    | Specific instruments to assess quality of life in children and adolescents with asthma.                                                                                                                                      | Studies on the quality of all available validated instruments to measure HRQoL in a particular population | Disease-specific     | More than two instruments | Multiple properties    |
| 116 | 2013 | Salek et al      | Clinical experience and psychometric properties of the Children's Dermatology Life Quality Index (CDLQI), 1995-2012                                                                                                          | Studies on the quality of one instrument to measures HRQoL in a particular population                     | Disease-specific     | One instrument            | Multiple properties    |
| 117 | 2013 | Testart et al    | Quality of life and other outcome measures in caregivers of patients with schizophrenia                                                                                                                                      | Studies on the quality of all available validated instruments to measure HRQoL in a particular population | Both                 | More than two instruments | Multiple properties    |
| 118 | 2013 | Weldam et al     | Evaluation of Quality of Life instruments for use in COPD care and research: A systematic review.                                                                                                                            | Studies on the quality of all available validated instruments to measure HRQoL in a particular population | Both                 | More than two instruments | Multiple properties    |
| 119 | 2013 | Wheelright et al | A systematic review of health-related quality of life instruments in patients with cancer cachexia                                                                                                                           | Studies on the quality of all available validated instruments to measure HRQoL in a particular population | Both                 | More than two instruments | Multiple properties    |
| 120 | 2013 | Yang et al       | An assessment of validity and responsiveness of generic measures of health-related quality of life in hearing impairment.                                                                                                    | Studies on the quality of all available validated instruments to measure HRQoL in a particular population | Generic              | More than two instruments | Multiple properties    |
| 121 | 2014 | Anthony et al    | Considering quality of life for children with cancer: a systematic review of patient-reported outcome measures and the development of a conceptual model                                                                     | Studies on the quality of all available validated instruments to measure HRQoL in a particular population | Both                 | More than two instruments | One specific property  |
| 122 | 2014 | Aspden et al     | Quality-of-life measures for use within care homes: a systematic review of their measurement properties.                                                                                                                     | Studies on the quality of all available validated instruments to measure HRQoL in a particular population | Both                 | More than two instruments | Multiple properties    |
| 123 | 2014 | Balioussis et al | Identifying and classifying quality of life tools for assessing spasticity after spinal cord injury.                                                                                                                         | Studies on the quality of all available validated instruments to measure HRQoL in a particular population | Both                 | More than two instruments | Multiple properties    |
| 124 | 2014 | Brazier et al    | A systematic review, psychometric analysis and qualitative assessment of generic preference-based measures of health in mental health populations and the estimation of mapping functions from widely used specific measures | Studies on the quality of a selection of instruments to measure HRQoL in a particular population          | Generic              | More than two instruments | Multiple properties    |

|    | ID  | Year | Author             | Title                                                                                                                                                            | Type of review                                                                                            | Instruments assessed | Number Instruments            | Measurement Properties |
|----|-----|------|--------------------|------------------------------------------------------------------------------------------------------------------------------------------------------------------|-----------------------------------------------------------------------------------------------------------|----------------------|-------------------------------|------------------------|
| 1  |     |      |                    |                                                                                                                                                                  |                                                                                                           |                      |                               |                        |
| 2  | 125 | 2014 | Chiu et al         | Comparison of three shortened questionnaires for assessment of quality of life in advanced cancer.                                                               | Studies on the quality of a selection of instruments to measure HRQoL in a particular population          | Disease-specific     | More than two instruments     | Multiple properties    |
| 3  |     |      |                    |                                                                                                                                                                  |                                                                                                           |                      |                               |                        |
| 4  | 126 | 2014 | Chow et al         | Comparison of the EORTC QLQ-BN20 and the FACT-Br quality of life questionnaires for patients with primary brain cancers: a literature review.                    | Studies on the quality of a selection of instruments to measure HRQoL in a particular population          | Disease-specific     | Comparison of two instruments | Multiple properties    |
| 5  | 127 | 2014 | Garin et al        | Assessing health-related quality of life in patients with heart failure: a systematic, standardized comparison of available measures.                            | Studies on the quality of a selection of instruments to measure HRQoL in a particular population          | Disease-specific     | More than two instruments     | Multiple properties    |
| 6  |     |      |                    |                                                                                                                                                                  |                                                                                                           |                      |                               |                        |
| 7  | 128 | 2014 | Gilchrist et al    | Assessment of the quality of measures of child oral health-related quality of life.                                                                              | Studies on the quality of a selection of instruments to measure HRQoL in a particular population          | Generic              | More than two instruments     | Multiple properties    |
| 8  |     |      |                    |                                                                                                                                                                  |                                                                                                           |                      |                               |                        |
| 9  | 129 | 2014 | Grubbs et al       | A review of quality of life measures in dry eye questionnaires.                                                                                                  | Studies on the quality of all available validated instruments to measure HRQoL in a particular population | Both                 | More than two instruments     | Multiple properties    |
| 10 | 130 | 2014 | Gupta et al        | The COPD assessment test: a systematic review.                                                                                                                   | Studies on the quality of one instrument to measure HRQoL in a particular population                      | Disease-specific     | One instrument                | Multiple properties    |
| 11 |     |      |                    |                                                                                                                                                                  |                                                                                                           |                      |                               |                        |
| 12 | 131 | 2014 | Hawkins et al      | A Systematic Review of Functional and Quality of Life Assessment after Major Lower Extremity Amputation                                                          | Studies on the quality of all available validated instruments to measure HRQoL in a particular population | Both                 | More than two instruments     | Multiple properties    |
| 13 | 132 | 2014 | Hewison et al      | An evaluative review of questionnaires recommended for the assessment of quality of life and symptom severity in women with urinary incontinence.                | Studies on the quality of all available validated instruments to measure HRQoL in a particular population | Both                 | More than two instruments     | Multiple properties    |
| 14 |     |      |                    |                                                                                                                                                                  |                                                                                                           |                      |                               |                        |
| 15 | 133 | 2014 | Ikeda et al        | Assessment of quality of life in children and youth with autism spectrum disorder: a critical review.                                                            | Studies on the quality of all available validated instruments to measure HRQoL in a particular population | Both                 | More than two instruments     | Multiple properties    |
| 16 |     |      |                    |                                                                                                                                                                  |                                                                                                           |                      |                               |                        |
| 17 | 134 | 2014 | Jardine et al      | Self-reported quality of life of young children with conditions from early infancy: a systematic review.                                                         | Studies on the quality of all available validated instruments to measure HRQoL in a particular population | Both                 | More than two instruments     | One specific property  |
| 18 |     |      |                    |                                                                                                                                                                  |                                                                                                           |                      |                               |                        |
| 19 | 135 | 2014 | Kuspinar et al     | A review of the psychometric properties of generic utility measures in multiple sclerosis.                                                                       | Studies on the quality of all available validated instruments to measure HRQoL in a particular population | Generic              | More than two instruments     | Multiple properties    |
| 20 | 136 | 2014 | Lee et al          | Measurement properties of rheumatoid arthritis-specific quality-of-life questionnaires: Systematic review of the literature.                                     | Studies on the quality of a selection of instruments to measure HRQoL in a particular population          | Disease-specific     | More than two instruments     | Multiple properties    |
| 21 |     |      |                    |                                                                                                                                                                  |                                                                                                           |                      |                               |                        |
| 22 | 137 | 2014 | Lieu et al         | Pediatric quality of life in children with otolaryngologic disease: what inventories are available and what is still needed?                                     | Studies on the quality of all available validated instruments to measure HRQoL in a particular population | Both                 | More than two instruments     | Multiple properties    |
| 23 |     |      |                    |                                                                                                                                                                  |                                                                                                           |                      |                               |                        |
| 24 | 138 | 2014 | Longworth et al    | Use of generic and condition-specific measures of health-related quality of life in NICE decision-making: a systematic review, statistical modelling and survey. | Studies on the quality of all available validated instruments to measure HRQoL in a particular population | Both                 | More than two instruments     | Multiple properties    |
| 25 | 139 | 2014 | Makai et al        | Quality of life instruments for economic evaluations in health and social care for older people: A systematic review.                                            | Studies on the quality of a selection of instruments to measure HRQoL in a particular population          | Generic              | More than two instruments     | Multiple properties    |
| 26 |     |      |                    |                                                                                                                                                                  |                                                                                                           |                      |                               |                        |
| 27 | 140 | 2014 | Niu et al          | Health-related quality of life in women with breast cancer: a literature-based review of psychometric properties of breast cancer-specific measures.             | Studies on the quality of a selection of instruments to measure HRQoL in a particular population          | Disease-specific     | More than two instruments     | Multiple properties    |
| 28 |     |      |                    |                                                                                                                                                                  |                                                                                                           |                      |                               |                        |
| 29 | 141 | 2014 | Salvilla et al     | Disease-specific health-related quality of life instruments for IgE-mediated food allergy                                                                        | Studies on the quality of a selection of instruments to measure HRQoL in a particular population          | Disease-specific     | More than two instruments     | Multiple properties    |
| 30 | 142 | 2014 | Schmidt et al      | Assessing quality of life in patients with prostate cancer: a systematic and standardized comparison of available instruments.                                   | Studies on the quality of a selection of instruments to measure HRQoL in a particular population          | Disease-specific     | More than two instruments     | Multiple properties    |
| 31 |     |      |                    |                                                                                                                                                                  |                                                                                                           |                      |                               |                        |
| 32 | 143 | 2014 | Smith et al        | Most domains of the European Organisation for Research and Treatment of Cancer Quality of Life Questionnaire C30 are reliable.                                   | Studies on the quality of one instrument to measure HRQoL in a particular population                      | Disease-specific     | One instrument                | One specific property  |
| 33 |     |      |                    |                                                                                                                                                                  |                                                                                                           |                      |                               |                        |
| 34 | 144 | 2014 | Souza et al        | Tools used for evaluation of Brazilian children's quality of life                                                                                                | Studies on the quality of all available validated instruments to measure HRQoL in a particular population | Generic              | More than two instruments     | Multiple properties    |
| 35 | 145 | 2014 | Swigris et al      | The psychometric properties of the St George's Respiratory Questionnaire (SGRQ) in patients with idiopathic pulmonary fibrosis: a literature review.             | Studies on the quality of one instrument to measure HRQoL in a particular population                      | Disease-specific     | One instrument                | Multiple properties    |
| 36 |     |      |                    |                                                                                                                                                                  |                                                                                                           |                      |                               |                        |
| 37 | 146 | 2014 | Timmerman et al    | Psychometric characteristics of health-related quality-of-life questionnaires in oropharyngeal dysphagia.                                                        | Studies on the quality of a selection of instruments to measure HRQoL in a particular population          | Disease-specific     | More than two instruments     | Multiple properties    |
| 38 | 147 | 2014 | Treanor & Donnelly | A methodological review of the Short Form Health Survey 36 (SF-36) and its derivatives among breast cancer survivors                                             | Studies on the quality of a selection of instruments to measure HRQoL in a particular population          | Generic              | More than two instruments     | Multiple properties    |
| 39 |     |      |                    |                                                                                                                                                                  |                                                                                                           |                      |                               |                        |
| 40 | 148 | 2014 | Watt et al         | Assessing health-related quality of life in patients with benign non-toxic goitre                                                                                | Studies on the quality of all available validated instruments to measure HRQoL in a particular population | Both                 | More than two instruments     | Multiple properties    |
| 41 |     |      |                    |                                                                                                                                                                  |                                                                                                           |                      |                               |                        |
| 42 | 149 | 2014 | Wolpe et al        | Assessing the impact of urinary incontinence on quality of life: systematic review of instruments in Portuguese.                                                 | Studies on the quality of a selection of instruments to measure HRQoL in a particular population          | Disease-specific     | More than two instruments     | Multiple properties    |



| ID  | Year | Author                 | Title                                                                                                                                                                                     | Type of review                                                                                            | Instruments assessed | Number Instruments        | Measurement Properties |
|-----|------|------------------------|-------------------------------------------------------------------------------------------------------------------------------------------------------------------------------------------|-----------------------------------------------------------------------------------------------------------|----------------------|---------------------------|------------------------|
| 150 | 2015 | Alrubaiy et al         | Systematic review of health-related quality of life measures for inflammatory bowel disease                                                                                               | Studies on the quality of a selection of instruments to measure HRQoL in a particular population          | Disease-specific     | More than two instruments | Multiple properties    |
| 151 | 2015 | Aspesberro et al       | Health-related quality of life following pediatric critical illness.                                                                                                                      | Studies on the quality of all available validated instruments to measure HRQoL in a particular population | Both                 | More than two instruments | Multiple properties    |
| 152 | 2015 | Bédard et al           | Systematic review of vision-related quality of life questionnaires for older institutionalised seniors with dementia                                                                      | Studies on the quality of one instrument to measure HRQoL in a particular population                      | Disease-specific     | One instrument            | Multiple properties    |
| 153 | 2015 | Bowling et al          | Quality of life in dementia: a systematically conducted narrative review of dementia-specific measurement scales.                                                                         | Studies on the quality of a selection of instruments to measure HRQoL in a particular population          | Disease-specific     | More than two instruments | Multiple properties    |
| 154 | 2015 | Conijn et al           | Assessing the quality of available patient reported outcome measures for intermittent claudication: a systematic review using the COSMIN checklist.                                       | Studies on the quality of a selection of instruments to measure HRQoL in a particular population          | Disease-specific     | More than two instruments | Multiple properties    |
| 155 | 2015 | de Climens et al       | Review of patient-reported outcome instruments measuring health-related quality of life and satisfaction in patients with type 2 diabetes treated with oral therapy.                      | Studies on the quality of all available validated instruments to measure HRQoL in a particular population | Both                 | More than two instruments | Multiple properties    |
| 156 | 2015 | Dronavalli & Thompson  | A systematic review of measurement tools of health and well-being for evaluating community-based interventions.                                                                           | Studies on the quality of all available validated instruments to measure HRQoL in a particular population | Both                 | More than two instruments | Multiple properties    |
| 157 | 2015 | Hamoen et al           | Measuring health-related quality of life in men with prostate cancer: A systematic review of the most used questionnaires and their validity.                                             | Studies on the quality of all available validated instruments to measure HRQoL in a particular population | Both                 | More than two instruments | Multiple properties    |
| 158 | 2015 | Hu et al               | How Quality of Life as Patient-Reported Outcome Has Been Studied for Rheumatoid Arthritis in Chinese-Speaking Population                                                                  | Studies on the quality of all available validated instruments to measure HRQoL in a particular population | Both                 | More than two instruments | Multiple properties    |
| 159 | 2015 | Janssens et al         | Measurement properties of multidimensional patient-reported outcome measures in neurodisability: a systematic review of evaluation studies.                                               | Studies on the quality of all available validated instruments to measure HRQoL in a particular population | Generic              | More than two instruments | Multiple properties    |
| 160 | 2015 | Launois et al          | Health-related quality-of-life scales specific for chronic venous disorders of the lower limbs.                                                                                           | Studies on the quality of a selection of instruments to measure HRQoL in a particular population          | Disease-specific     | More than two instruments | Multiple properties    |
| 161 | 2015 | Monticone et al        | Measurement properties of translated versions of the Scoliosis Research Society-22 Patient Questionnaire, SRS-22: A systematic review.                                                    | Studies on the quality of one instrument to measure HRQoL in a particular population                      | Disease-specific     | One instrument            | Multiple properties    |
| 162 | 2015 | Nguyen et al           | EORTC QLQ-BR23 and FACT-B for the assessment of quality of life in patients with breast cancer: a literature review.                                                                      | Studies on the quality of a selection of instruments to measure HRQoL in a particular population          | Disease-specific     | More than two instruments | Multiple properties    |
| 163 | 2015 | Oliveira et al         | Evaluation of cross-cultural adaptation and measurement properties of breast cancer-specific quality-of-life questionnaires: A systematic review.                                         | Studies on the quality of a selection of instruments to measure HRQoL in a particular population          | Disease-specific     | More than two instruments | Multiple properties    |
| 164 | 2015 | Polinder et al         | Health-related quality of life after TBI: a systematic review of study design, instruments, measurement properties, and outcome.                                                          | Studies on the quality of all available validated instruments to measure HRQoL in a particular population | Both                 | More than two instruments | Multiple properties    |
| 165 | 2015 | Taghavi et al          | Health-related quality of life in polycystic ovary syndrome patients: A systematic review.                                                                                                | Studies on the quality of one instrument to measure HRQoL in a particular population                      | Disease-specific     | One instrument            | Multiple properties    |
| 166 | 2015 | Wong et al             | Systematic review recommends the European Organization for Research and Treatment of Cancer colorectal cancer-specific module for measuring quality of life in colorectal cancer patients | Studies on the quality of all available validated instruments to measure HRQoL in a particular population | Both                 | More than two instruments | Multiple properties    |
| 167 | 2016 | Algar et al            | Measuring the quality of life and well-being of people with dementia: A review of observational measures.                                                                                 | Studies on the quality of all available validated instruments to measure HRQoL in a particular population | Both                 | More than two instruments | Multiple properties    |
| 168 | 2016 | Bryant et al           | A Systematic Review of Psychometric Properties of Health-Related Quality-of-Life and Symptom Instruments in Adult Acute Leukemia Survivors.                                               | Studies on the quality of all available validated instruments to measure HRQoL in a particular population | Both                 | More than two instruments | Multiple properties    |
| 169 | 2016 | Coombes et al          | Health-related quality-of-life outcome measures in paediatric palliative care: A systematic review of psychometric properties and feasibility of use.                                     | Studies on the quality of all available validated instruments to measure HRQoL in a particular population | Both                 | More than two instruments | Multiple properties    |
| 170 | 2016 | Dichter et al          | Linguistic validation and reliability properties are weak investigated of most dementia-specific quality of life measurements-a systematic review                                         | Studies on the quality of a selection of instruments to measure HRQoL in a particular population          | Disease-specific     | More than two instruments | Multiple properties    |
| 171 | 2016 | Ganesh et al           | Comparison of the FACT-C, EORTC QLQ-CR38, and QLQ-CR29 quality of life questionnaires for patients with colorectal cancer: a literature review.                                           | Studies on the quality of a selection of instruments to measure HRQoL in a particular population          | Generic              | More than two instruments | Multiple properties    |
| 172 | 2016 | Gutiérrez-Vargas et al | Instruments to measure the quality of life in patients with oral mucositis undergoing oncological treatment: a systematic review of the literature.                                       | Studies on the quality of all available validated instruments to measure HRQoL in a particular population | Generic              | More than two instruments | Multiple properties    |
| 173 | 2016 | Hand et al             | Measuring health-related quality of life in adults with chronic conditions in primary care settings: Critical review of concepts and 3 tools                                              | Studies on the quality of all available validated instruments to measure HRQoL in a particular population | Generic              | More than two instruments | Multiple properties    |
| 174 | 2016 | Heinl et al            | Measurement properties of adult quality of life measurement instruments for eczema: a systematic review                                                                                   | Studies on the quality of a selection of instruments to measure HRQoL in a particular population          | Disease-specific     | More than two instruments | Multiple properties    |

| ID  | Year | Author          | Title                                                                                                                                                                                                                                                                                                                     | Type of review                                                                                            | Instruments assessed | Number Instruments            | Measurement Properties |
|-----|------|-----------------|---------------------------------------------------------------------------------------------------------------------------------------------------------------------------------------------------------------------------------------------------------------------------------------------------------------------------|-----------------------------------------------------------------------------------------------------------|----------------------|-------------------------------|------------------------|
| 175 | 2016 | Kotecha et al   | Patient-Reported Outcomes for Quality of Life Assessment in Atrial Fibrillation: A Systematic Review of Measurement Properties.                                                                                                                                                                                           | Studies on the quality of a selection of instruments to measure HRQoL in a particular population          | Disease-specific     | More than two instruments     | Multiple properties    |
| 176 | 2016 | Lee et al       | A systematic review of measurement properties of the instruments measuring health-related quality of life in patients with irritable bowel syndrome.                                                                                                                                                                      | Studies on the quality of a selection of instruments to measure HRQoL in a particular population          | Disease-specific     | More than two instruments     | Multiple properties    |
| 177 | 2016 | Maratia et al   | Assessing health-related quality of life in patients with breast cancer: a systematic and standardized comparison of available instruments using the EMPRO tool.                                                                                                                                                          | Studies on the quality of all available validated instruments to measure HRQoL in a particular population | Both                 | More than two instruments     | Multiple properties    |
| 178 | 2016 | Mestre et al    | Rating scales for behavioral symptoms in Huntington's disease: Critique and recommendations.                                                                                                                                                                                                                              | Studies on the quality of all available validated instruments to measure HRQoL in a particular population | Both                 | More than two instruments     | Multiple properties    |
| 179 | 2016 | Spinou et al    | The validity of health-related quality of life questionnaires in bronchiectasis: a systematic review and meta-analysis                                                                                                                                                                                                    | Studies on the quality of all available validated instruments to measure HRQoL in a particular population | Both                 | More than two instruments     | Multiple properties    |
| 180 | 2016 | Tapia et al     | Health-Related Quality-of-Life Instruments for Pediatric Patients with Diverse Facial Deformities: A Systematic Literature Review                                                                                                                                                                                         | Studies on the quality of a selection of instruments to measure HRQoL in a particular population          | Both                 | More than two instruments     | Multiple properties    |
| 181 | 2016 | Wong et al      | A systematic review of quality of thyroid-specific health related quality of life instruments recommends ThyPRO for patients with benign thyroid diseases                                                                                                                                                                 | Studies on the quality of a selection of instruments to measure HRQoL in a particular population          | Disease-specific     | More than two instruments     | Multiple properties    |
| 182 | 2016 | Woo et al       | Comparison of the EORTC STO-22 and the FACT-Ga quality of life questionnaires for patients with gastric cancer.                                                                                                                                                                                                           | Studies on the quality of a selection of instruments to measure HRQoL in a particular population          | Generic              | Comparison of two instruments | Multiple properties    |
| 183 | 2017 | Ahmadi et al    | Acceptability, reliability, and validity of the Stroke and Aphasia Quality of Life Scale-39 (SAQOL-39) across languages: A systematic review.                                                                                                                                                                             | Studies on the quality of a selection of instruments to measure HRQoL in a particular population          | Disease-specific     | More than two instruments     | Multiple properties    |
| 184 | 2017 | Baghdadli et al | Measurement properties of screening and diagnostic tools for autism spectrum adults of mean normal intelligence: A systematic review.                                                                                                                                                                                     | Studies on the quality of a selection of instruments to measure HRQoL in a particular population          | Disease-specific     | More than two instruments     | Multiple properties    |
| 185 | 2017 | Best et al      | Identifying and classifying quality of life tools for neurogenic bladder function after spinal cord injury: A systematic review.                                                                                                                                                                                          | Studies on the quality of all available validated instruments to measure HRQoL in a particular population | Both                 | More than two instruments     | Multiple properties    |
| 186 | 2017 | Chen et al      | Inflammatory bowel disease-specific health-related quality of life instruments: a systematic review of measurement properties.                                                                                                                                                                                            | Studies on the quality of a selection of instruments to measure HRQoL in a particular population          | Disease-specific     | More than two instruments     | Multiple properties    |
| 187 | 2017 | Frew et al      | Disease-specific health related quality of life patient reported outcome measures in Genodermatoses: a systematic review and critical evaluation.                                                                                                                                                                         | Studies on the quality of a selection of instruments to measure HRQoL in a particular population          | Disease-specific     | More than two instruments     | Multiple properties    |
| 188 | 2017 | Heaney et al    | A review of the psychometric properties and use of the Rheumatoid Arthritis Quality of Life Questionnaire (RaQoL) in clinical research                                                                                                                                                                                    | Studies on the quality of one instrument to measures HRQoL in a particular population                     | Disease-specific     | One instrument                | Multiple properties    |
| 189 | 2017 | Heinl et al     | Measurement properties of quality-of-life measurement instruments for infants, children and adolescents with eczema: a systematic review.                                                                                                                                                                                 | Studies on the quality of a selection of instruments to measure HRQoL in a particular population          | Both                 | More than two instruments     | Multiple properties    |
| 190 | 2017 | Kandel et al    | Patient-reported Outcomes for Assessment of Quality of Life in Refractive Error: A Systematic Review.                                                                                                                                                                                                                     | Studies on the quality of all available validated instruments to measure HRQoL in a particular population | Both                 | More than two instruments     | Multiple properties    |
| 191 | 2017 | Kao et al       | Scoping Review of Pediatric Tonsillectomy Quality of Life Assessment Instruments                                                                                                                                                                                                                                          | Studies on the quality of all available validated instruments to measure HRQoL in a particular population | Both                 | More than two instruments     | Multiple properties    |
| 192 | 2017 | Khan et al      | Health Status and Quality of Life in Tuberculosis: Systematic Review of Study Design, Instruments, Measuring Properties and Outcomes.                                                                                                                                                                                     | Studies on the quality of a selection of instruments to measure HRQoL in a particular population          | Disease-specific     | More than two instruments     | Multiple properties    |
| 193 | 2017 | Kwan et al      | A systematic review of quality-of-life domains and items relevant to patients with spondyloarthritis                                                                                                                                                                                                                      | Studies on the quality of a selection of instruments to measure HRQoL in a particular population          | Disease-specific     | More than two instruments     | One specific property  |
| 194 | 2017 | Limpberg et al  | Health-related quality of life questionnaires in individuals with haemophilia: a systematic review of their measurement properties                                                                                                                                                                                        | Studies on the quality of all available validated instruments to measure HRQoL in a particular population | Both                 | More than two instruments     | Multiple properties    |
| 195 | 2017 | Lucendo et al   | Systematic review: health-related quality of life in children and adults with eosinophilic oesophagitis-instruments for measurement and determinant factors. Systematic review: health-related quality of life in children and adults with eosinophilic oesophagitis-instruments for measurement and determinant factors. | Studies on the quality of all available validated instruments to measure HRQoL in a particular population | Both                 | More than two instruments     | Multiple properties    |
| 196 | 2017 | Page et al      | Instruments measuring the disease-specific quality of life of family carers of people with neurodegenerative diseases: a systematic review.                                                                                                                                                                               | Studies on the quality of a selection of instruments to measure HRQoL in a particular population          | Disease-specific     | More than two instruments     | Multiple properties    |
| 197 | 2017 | Poku et al      | Systematic review assessing the measurement properties of patient-reported outcomes for venous leg ulcers.                                                                                                                                                                                                                | Studies on the quality of all available validated instruments to measure HRQoL in a particular population | Both                 | More than two instruments     | Multiple properties    |
| 198 | 2017 | Roydhouse et al | Systematic review of caregiver responses for patient health-related quality of life in adult cancer care.                                                                                                                                                                                                                 | Studies on the quality of all available validated instruments to measure HRQoL in a particular population | Both                 | More than two instruments     | One specific property  |

| ID  | Year | Author               | Title                                                                                                                                                                                                                              | Type of review                                                                                            | Instruments assessed | Number Instruments            | Measurement Properties |
|-----|------|----------------------|------------------------------------------------------------------------------------------------------------------------------------------------------------------------------------------------------------------------------------|-----------------------------------------------------------------------------------------------------------|----------------------|-------------------------------|------------------------|
| 199 | 2017 | Strada et al         | Measuring quality of life in opioid-dependent people: a systematic review of assessment instruments.                                                                                                                               | Studies on the quality of all available validated instruments to measure HRQoL in a particular population | Both                 | More than two instruments     | Multiple properties    |
| 200 | 2017 | Sullivan et al       | Assessing quality of life of patients with hypospadias: A systematic review of validated patient-reported outcome instruments.                                                                                                     | Studies on the quality of all available validated instruments to measure HRQoL in a particular population | Both                 | More than two instruments     | Multiple properties    |
| 201 | 2017 | Tang et al           | Assessing quality of life in diabetes: II - Deconstructing measures into a simple framework.                                                                                                                                       | Studies on the quality of a selection of instruments to measure HRQoL in a particular population          | Disease-specific     | More than two instruments     | Multiple properties    |
| 202 | 2017 | Tax et al            | Measuring health-related quality of life in cervical cancer patients: a systematic review of the most used questionnaires and their validity.                                                                                      | Studies on the quality of a selection of instruments to measure HRQoL in a particular population          | Disease-specific     | Comparison of two instruments | Multiple properties    |
| 203 | 2017 | Xin & McIntosh       | Assessment of the construct validity and responsiveness of preference-based quality of life measures in people with Parkinson's: a systematic review                                                                               | Studies on the quality of all available validated instruments to measure HRQoL in a particular population | Both                 | More than two instruments     | Multiple properties    |
| 204 | 2018 | Aber et al           | Themes that Determine Quality of Life in Patients with Peripheral Arterial Disease: A Systematic Review                                                                                                                            | Studies on the quality of all available validated instruments to measure HRQoL in a particular population | Both                 | More than two instruments     | One specific property  |
| 205 | 2018 | Chiarotto et al      | Evidence on the measurement properties of health-related quality of life instruments is largely missing in patients with low back pain, a systematic review.                                                                       | Studies on the quality of all available validated instruments to measure HRQoL in a particular population | Generic              | More than two instruments     | Multiple properties    |
| 206 | 2018 | Cornelissen et al    | Quality of Life Questionnaires in Breast Cancer-Related Lymphedema Patients: Review of the Literature                                                                                                                              | Studies on the quality of all available validated instruments to measure HRQoL in a particular population | Both                 | More than two instruments     | One specific property  |
| 207 | 2018 | de Vries et al       | Recommendations on the most suitable quality-of-life measurement instruments for bariatric and body contouring surgery: a systematic review.                                                                                       | Studies on the quality of a selection of instruments to measure HRQoL in a particular population          | Disease-specific     | More than two instruments     | Multiple properties    |
| 208 | 2018 | Dow et al            | How best to assess quality of life in informal carers of people with dementia: A systematic review of existing outcome measures                                                                                                    | Studies on the quality of all available validated instruments to measure HRQoL in a particular population | Both                 | More than two instruments     | Multiple properties    |
| 209 | 2018 | Grobet et al         | Application and measurement properties of EQ-5D to measure quality of life in patients with upper extremity orthopaedic disorders: a systematic literature review.                                                                 | Studies on the quality of one instrument to measure HRQoL in a particular population                      | Generic              | One instrument                | Multiple properties    |
| 210 | 2018 | Haywood et al        | Assessing health-related quality of life (HRQoL) in survivors of out-of-hospital cardiac arrest: A systematic review of patient-reported outcome measures                                                                          | Studies on the quality of all available validated instruments to measure HRQoL in a particular population | Both                 | More than two instruments     | Multiple properties    |
| 211 | 2018 | Luan et al           | A Review of Studies of Quality of Life for Chinese-Speaking Patients with Ischemic Heart Disease                                                                                                                                   | Studies on the quality of a selection of instruments to measure HRQoL in a particular population          | Both                 | More than two instruments     | Multiple properties    |
| 212 | 2018 | Mason et al          | Evaluating patient-reported outcome measures (PROMs) for bladder cancer: a systematic review using the Consensus-based Standards for the selection of health Measurement Instruments (COSMIN)                                      | Studies on the quality of all available validated instruments to measure HRQoL in a particular population | Both                 | More than two instruments     | Multiple properties    |
| 213 | 2018 | Mohammed et al       | Pharmaceutical care and health related quality of life outcomes over the past 25 years: Have we measured dimensions that really matter?                                                                                            | Studies on the quality of all available validated instruments to measure HRQoL in a particular population | Both                 | More than two instruments     | One specific property  |
| 214 | 2018 | Mpundu-Kaambwa et al | A review of preference-based measures for the assessment of quality of life in children and adolescents with cerebral palsy.                                                                                                       | Studies on the quality of a selection of instruments to measure HRQoL in a particular population          | Both                 | More than two instruments     | Multiple properties    |
| 215 | 2018 | Pollo et al          | Evaluation Instruments for Quality of Life Related to Melasma: An Integrative Review.                                                                                                                                              | Studies on the quality of one instrument to measure HRQoL in a particular population                      | Disease-specific     | One instrument                | Multiple properties    |
| 216 | 2018 | Tian & Cao           | Systematic review of the psychometric properties of disease-specific, quality-of-life questionnaires for patients with hepatobiliary or pancreatic cancers                                                                         | Studies on the quality of a selection of instruments to measure HRQoL in a particular population          | Disease-specific     | More than two instruments     | Multiple properties    |
| 217 | 2018 | van Ierssel et al    | Identifying the concepts contained within health-related quality of life outcome measures in concussion research using the International Classification of Functioning, Disability, and Health as a reference: a systematic review | Studies on the quality of a selection of instruments to measure HRQoL in a particular population          | Disease-specific     | More than two instruments     | One specific property  |
| 218 | 2018 | van Roij et al       | Measuring health-related quality of life in patients with advanced cancer: a systematic review of self-administered measurement instruments.                                                                                       | Studies on the quality of all available validated instruments to measure HRQoL in a particular population | Both                 | More than two instruments     | Multiple properties    |
| 219 | 2018 | Yarlas et al         | Psychometric validation of the SF-36® Health Survey in ulcerative colitis: results from a systematic literature review                                                                                                             | Studies on the quality of one instrument to measure HRQoL in a particular population                      | Generic              | One instrument                | Multiple properties    |
| 220 | 2018 | Yazdani et al        | Psychometric Properties of Quality of Life Assessment Tools in Morbid Obesity: A Review of Literature.                                                                                                                             | Studies on the quality of all available validated instruments to measure HRQoL in a particular population | Both                 | More than two instruments     | Multiple properties    |
| 221 | 2018 | Zaror et al          | Assessing oral health-related quality of life in children and adolescents : a systematic review and standardized comparison of available instruments                                                                               | Studies on the quality of all available validated instruments to measure HRQoL in a particular population | Both                 | More than two instruments     | Multiple properties    |
| 222 | 2018 | Hettiarachchi et al  | Pediatric Quality of Life Instruments in Oral Health Research: A Systematic Review                                                                                                                                                 | Studies on the quality of all available validated instruments to measure HRQoL in a particular population | Both                 | More than two instruments     | Multiple properties    |

| ID  | Year | Author              | Title                                                                                                                                                                                                                     | Type of review                                                                                            | Instruments assessed | Number Instruments        | Measurement Properties |
|-----|------|---------------------|---------------------------------------------------------------------------------------------------------------------------------------------------------------------------------------------------------------------------|-----------------------------------------------------------------------------------------------------------|----------------------|---------------------------|------------------------|
| 223 | 2019 | Balk et al.         | Psychometric properties of functional, ambulatory, and quality of life instruments in lower limb amputees: a systematic review                                                                                            | Studies on the quality of all available validated instruments to measure HRQoL in a particular population | Both                 | More than two instruments | Multiples properties   |
| 224 | 2019 | Belayneh et al.     | A systematic review of the psychometric properties of the cross-cultural adaptations and translations of the prolapse quality of life questionnaire                                                                       | Studies on the quality of one instrument to measures HRQoL in a particular population                     | Disease-specific     | One instrument            | Multiples properties   |
| 225 | 2019 | Bull et al.         | Systematic review: measurement properties of patient-reported outcome measures evaluated with childhood brain tumor survivors or other acquired brain injury                                                              | Studies on the quality of all available validated instruments to measure HRQoL in a particular population | Both                 | More than two instruments | Multiples properties   |
| 226 | 2019 | Choukou et al.      | Identifying and classifying quality of life tools for assessing neurogenic bowel dysfunction after spinal cord injury                                                                                                     | Studies on the quality of all available validated instruments to measure HRQoL in a particular population | Both                 | More than two instruments | Multiples properties   |
| 227 | 2019 | Daliya et al.       | A systematic review of patient reported outcome measures (PROMs) and quality of life reporting in patients undergoing laparoscopic cholecystectomy                                                                        | Studies on the quality of all available validated instruments to measure HRQoL in a particular population | Both                 | More than two instruments | Multiples properties   |
| 228 | 2019 | Gabes et al.        | Measurement properties of quality-of-life outcome measures for children and adults with eczema: An updated systematic review                                                                                              | Studies on the quality of all available validated instruments to measure HRQoL in a particular population | Both                 | More than two instruments | Multiples properties   |
| 229 | 2019 | Gondivkar et al.    | Assessment of oral health-related quality of life instruments for oral submucous fibrosis: A systematic review using the COnsensus-based Standards for the selection of health Measurement Instruments (COSMIN) checklist | Studies on the quality of all available validated instruments to measure HRQoL in a particular population | Both                 | More than two instruments | Multiples properties   |
| 230 | 2019 | Hasanvand et al.    | A Critical Review of Instruments Measuring the Quality of Life of Cancer Patients in Iranian Studies and Their Psychometrics Properties                                                                                   | Studies on the quality of all available validated instruments to measure HRQoL in a particular population | Both                 | More than two instruments | Multiples properties   |
| 231 | 2019 | Hughes et al.       | Psychometric properties and feasibility of use of dementia specific quality of life instruments for use in care settings: a systematic review                                                                             | Studies on the quality of a selection of instruments to measure HRQoL in a particular population          | Disease-specific     | More than two instruments | Multiple properties    |
| 232 | 2019 | Hunt et al.         | Quality of life in older adults after traumatic brain injury: a systematic review                                                                                                                                         | Studies on the quality of all available validated instruments to measure HRQoL in a particular population | Both                 | More than two instruments | Multiples properties   |
| 233 | 2019 | Kamilu et al.       | Quality of life assessment scales in polio survivors: a scoping review                                                                                                                                                    | Studies on the quality of all available validated instruments to measure HRQoL in a particular population | Both                 | More than two instruments | Multiples properties   |
| 234 | 2019 | Lamsal et al.       | Generic preference-based health-related quality of life in children with neurodevelopmental disorders: a scoping review                                                                                                   | Studies on the quality of a selection of instruments to measure HRQoL in a particular population          | Generic              | More than two instruments | Multiples properties   |
| 235 | 2019 | Moshki et al.       | The content comparison of health-related quality of life measures in heart failure based on the international classification of functioning, disability, and health: a systematic review                                  | Studies on the quality of a selection of instruments to measure HRQoL in a particular population          | Disease-specific     | More than two instruments | One specific property  |
| 236 | 2019 | Speyer et al.       | "Measurement properties of self-report questionnaires on health related quality of life and functional health status in dysphonia: a systematic review using the COSMIN taxonomy"                                         | Studies on the quality of all available validated instruments to measure HRQoL in a particular population | Both                 | More than two instruments | Multiple properties    |
| 237 | 2019 | van der Hout et al. | Measuring health-related quality of life in colorectal cancer patients: systematic review of measurement properties of the EORTC QLQ-CR29                                                                                 | Studies on the quality of one instrument to measures HRQoL in a particular population                     | Generic              | One instrument            | Multiple properties    |
| 238 | 2019 | Vasconcelos et al.  | Quality of Life in Women with Defecatory Dysfunctions: Systematic Review of Questionnaires Validated in the Portuguese Language                                                                                           | Studies on the quality of a selection of instruments to measure HRQoL in a particular population          | Disease-specific     | More than two instruments | Multiple properties    |
| 239 | 2020 | Crudgington et al.  | Epilepsy-specific patient-reported outcome measures of children's health related quality of life: a systematic review of measurement properties                                                                           | Studies on the quality of a selection of instruments to measure HRQoL in a particular population          | Disease-specific     | More than two instruments | Multiples properties   |
| 240 | 2020 | Furtado et al.      | Cross-cultural adaptations and measurement properties of the WORC(Western Ontario rotator cuff index): a systematic review                                                                                                | Studies on the quality of one instrument to measures HRQoL in a particular population                     | Disease-specific     | One instrument            | Multiples properties   |
| 241 | 2020 | Jones et al.        | A feasibility assessment of functioning and quality of life patient reported outcome measures in adult epilepsy clinics. A systematic review                                                                              | Studies on the quality of all available validated instruments to measure HRQoL in a particular population | Both                 | More than two instruments | Multiples properties   |
| 242 | 2020 | Killian et al.      | Measurement of health-related quality of life in pediatric organ transplantation recipients: a systematic review of the PedsQL transplant module                                                                          | Studies on the quality of one instrument to measures HRQoL in a particular population                     | Disease-specific     | One instrument            | Multiples properties   |

Note: The concept "Both" is referred to generic and disease-specific instruments.

| ID  | Year | Author                 | Title                                                                                                                                                                          | Type of review                                                                                            | Instruments assessed | Number Instruments        | Measurement Properties |
|-----|------|------------------------|--------------------------------------------------------------------------------------------------------------------------------------------------------------------------------|-----------------------------------------------------------------------------------------------------------|----------------------|---------------------------|------------------------|
| 243 | 2020 | Losada-Puente          | A systematic review of the assessment of quality of life in adolescents                                                                                                        | Studies on the quality of a selection of instruments to measure HRQoL in a particular population          | Disease-specific     | More than two instruments | Multiple properties    |
| 244 | 2020 | Moller et al.          | Specific measures of quality of life in patients with multimorbidity in primary healthcare: a systematic review on patient-reported outcomes measures' adequacy of measurement | Studies on the quality of one instrument to measure HRQoL in a particular population                      | Disease-specific     | More than two instruments | Multiple properties    |
| 245 | 2020 | Qian et al.            | Measurement properties of commonly used generic preference-based measures in East and South-East Asia: a systematic review                                                     | Studies on the quality of a selection of instruments to measure HRQoL in general population               | Generic              | More than two instruments | Multiple properties    |
| 246 | 2020 | Santana-Berlanga et al | Instruments to measure quality of life in institutionalised older adults: systematic review                                                                                    | Studies on the quality of all available validated instruments to measure HRQoL in a particular population | Both                 | More than two instruments | Multiple properties    |

Note: The concept "Both" is referred to generic and disease-specific instruments.

For peer review only

## REFERENCES

1. Barbosa T, Gavião M. Oral health-related quality of life in children: Part III. Is there agreement between parents in rating their children's oral health-related quality of life? A systematic review. *Int J Dent Hyg*. 2008;6(2):108–13.
2. Basra MKA, Fenech R, Gatt RM, Salek MS, Finlay AY. The Dermatology Life Quality Index 1994-2007: A comprehensive review of validation data and clinical results. *Br J Dermatol*. 2008;159(5):997–1035.
3. Carabin H, Sonleitner N, Keesee M, Shinault K. Quality of life measurement tools for people living with HIV/AIDS. *J HIV/AIDS Soc Serv*. 2008;7(1):71–82.
4. Chassany O, Holtmann G, Malagelada J, Gebauer U, Doerfler H, Devault K. Systematic review: health-related quality of life (HRQOL) questionnaires in gastro-oesophageal reflux disease. *Aliment Pharmacol Ther*. 2008;27(11):1053–70.
5. El Achhab Y, Nejjar C, Chikri M, Lyoussi B. Disease-specific health-related quality of life instruments among adults diabetic: A systematic review. *Diabetes Res Clin Pract*. 2008;80(2):171–84.
6. Finger RP, Fleckenstein M, Holz FG, Scholl HPN. Quality of life in age-related macular degeneration: a review of available vision-specific psychometric tools. *Qual Life Res*. 2008;17(4):559–74.
7. Franic DM, Bothe AK. Psychometric Evaluation of Condition-Specific Instruments Used to Assess Health-Related Quality of Life, Attitudes, and Related Constructs in Stuttering. *Am J Speech*. 2008;17(1):60–80.
8. Janssens L, Gorter JW, Ketelaar M, Kramer WLM, Holtslag HR. Health-related quality-of-life measures for long-term follow-up in children after major trauma. *Qual Life Res*. 2008;17(5):701–13.
9. Klassen AF, Stotland MA, Skarsgard ED, Pusic AL. Clinical research in pediatric plastic surgery and systematic review of quality-of-life questionnaires. *Clin Plast Surg*. 2008;35:251–7.
10. Kluivers KB, Riphagen I, Vierhout ME, Brölmann HAM, de Vet HCW. Systematic review on recovery specific quality-of-life instruments. *Surgery*. 2008;143(2):206–15.
11. Langham S, Maggi M, Schulman C, Quinton R, Uhl-Hochgraeber K. Health-related quality of life instruments in studies of adult men with testosterone deficiency syndrome: A critical assessment. *J Sex Med*. 2008;5(12):2842–52.
12. Pearce NJM, Sanson-Fisher R, Campbell HS. Measuring quality of life in cancer survivors: a methodological review of existing scales. *Psychooncology*. 2008;17(7):629–40.
13. Price MA, Hill CD, Williams VS, Morlock RJ, Leewenkamp O, Patterson T. Measures of functional status and quality-of-life in schizophrenia. *Curr Psychiatry Rev*. 2008;4(1):28–38.
14. Quittner AL, Modi A, Cruz I. Systematic review of health-related quality of life measures for children with respiratory conditions. *Paediatr Respir Rev*. 2008;9(3):220–32.
15. Reaney MD, Martin C, Speight J. Understanding and Assessing the Impact of Alcoholism on Quality of Life. *Patient*. 2008;1(3):151–63.
16. Schlarman J, Metzger-Blau S, Schnepf W, Schlarman JG, Metzger-Blau S, Schnepf W, et al. The use of health-related quality of life (HRQOL) in children and adolescents as an outcome criterion to evaluate family oriented support for young carers in Germany: an integrative review of the literature. *BMC Public Health*. 2008;8(1):414.
17. Solans M, Pane S, Estrada M-D, Serra-Sutton V, Berra S, Herdman M, et al. Health-related quality of life measurement in children and adolescents: A systematic review of generic and disease-specific instruments. *Value Heal*. 2008;11(4):742–64.
18. Tschiesner U, Rogers SN, Harréus U, Berghaus A, Cieza A. Content comparison of quality of life questionnaires used in head and neck cancer based on the international classification of functioning, disability and health: A systematic review. *Eur Arch Oto-Rhino-Laryngology*. 2008;265(6):627–37.
19. Upton P, Lawford J, Eiser C. Parent-child agreement across child health-related quality of life instruments: a review of the literature. *Qual Life Res*. 2008;17(6):895–913.
20. Davies N. Measuring health-related. *Nurs Stand*. 2009;23(30):42–50.
21. Derrett S, Black J, Herbison GP. Outcome after injury-a systematic literature search of studies using the EQ-5D. *J Trauma*. 2009;67(4):883–90.
22. Epton J, Harris R, Jenkinson C. Quality of life in amyotrophic lateral sclerosis/motor neuron disease: a structured review. *Amyotroph Lateral Scler*. 2009;10(1):15–26.
23. Fitzsimmons D, Gilbert J, Howse F, Young T, Arraras JI, Brédart A, et al. A systematic review of the use and validation of health-related quality of life instruments in older cancer patients. *Eur J Cancer*. 2009;45(1):19–32.
24. Garin O, Ferrer M, Pont À, Rué M, Kotzeva A, Wiklund I, et al. Disease-specific health-related quality of life questionnaires for heart failure: A systematic review with meta-analyses. *Qual Life Res*. 2009;18(1):71–85.
25. Garvie PA, Lawford J, Banet MS, West RL. Quality of life measurement in paediatric and adolescent populations with HIV: A review of the literature. *Childcare, Heal Dev*. 2009;35(4):440–53.
26. Guo N, Marra F, Marra CA. Measuring health-related quality of life in tuberculosis: a systematic review. *Health Qual Life Outcomes*. 2009;7:14.
27. Jay CL, Butt Z, Ladner DP, Skaro AI, Abecassis MM. A review of quality of life instruments used in liver transplantation. *J Hepatol*. 2009;51(5):949–59.
28. Speight J, Reaney MD, Barnard KD. Not all roads lead to Rome-a review of quality of life measurement in adults with diabetes. *Diabet Med*. 2009;26(4):315–27.
29. Street J, Berven S, Fisher C, Ryken T. Health Related Quality of Life Assessment in Metastatic Disease of the Spine. *Spine (Phila Pa 1976)*. 2009;34(Supplement):S128–34.
30. Waters E, Davis E, Ronen GM, Rosenbaum P, Livingston M, Saigal S. Quality of life instruments for children and adolescents with neurodisabilities: How to choose the appropriate instrument. Vol. 51, *Developmental Medicine & Child Neurology*. 2009. p. 660–9.



31. Wettergren L, Kettis-Lindblad Å, Sprangers M, Ring L. The use, feasibility and psychometric properties of an individualised quality-of-life instrument: A systematic review of the SEIQoL-DW. *Qual Life Res.* 2009;18(6):737–46.
32. Albers G, Echteld MA, de Vet HCW, Onwuteaka-Philipsen BD, van der Linden MHM, Deliens L. Evaluation of quality-of-life measures for use in palliative care: a systematic review. *Palliat Med.* 2010;24(1):17–37.
33. Branski RC, Cukier-Blaj S, Pusic A, Cano SJ, Klassen A, Mener D, et al. Measuring quality of life in dysphonic patients: a systematic review of content development in patient-reported outcomes measures. *J Voice.* 2010;23(2):193–8.
34. Bronsard V, Paul C, Prey S, Puzenat E, Gourraud P-A, Aractingi S, et al. What are the best outcome measures for assessing quality of life in plaque type psoriasis? A systematic review of the literature. *J Eur Acad Dermatology Venereol.* 2010;24 Suppl 2:17–22.
35. Carlon S, Shields N, Yong K, Gilmore R, Sakzewski L, Boyd R. A systematic review of the psychometric properties of Quality of Life measures for school aged children with cerebral palsy. *BMC Pediatr.* 2010;10:81.
36. Chen CM, Cano SJ, Klassen AF, King T, McCarthy C, Cordeiro PG, et al. Measuring Quality of Life in Oncologic Breast Surgery: A Systematic Review of Patient-Reported Outcome Measures. *Breast J.* 2010;16(6):587–97.
37. Danquah FVN, Wasserman J, Meininger J, Bergstrom N. Quality of life measures for patients on hemodialysis: a review of psychometric properties. *Nephrol Nurs J.* 2010;37(3):255–69; quiz 270.
38. Forhan M, Vrkljan B, MacDermid J. A systematic review of the quality of psychometric evidence supporting the use of an obesity-specific quality of life measure for use with persons who have class III obesity: Diagnostic in Obesity and Complications. *Obes Rev.* 2010;11(3):222–8.
39. Hill MR, Noonan VK, Sakakibara BM, Miller WC, SCIRE. Quality of life instruments and definitions in individuals with spinal cord injury: A systematic review. *Spinal Cord.* 2010;48(6):438–50.
40. Kamalski DM, Hoekstra CE, van Zanten BG, Grolman W, Rovers MM. Measuring disease-specific health-related quality of life to evaluate treatment outcomes in tinnitus patients: a systematic review. *Otolaryngol Neck Surg.* 2010;143(2):181–5.
41. Klassen AF, Strohm SJ, Maurice-Stam H, Grootenhuis MA. Quality of life questionnaires for children with cancer and childhood cancer survivors: a review of the development of available measures. *Support Care Cancer.* 2010 Sep;18(9):1207–17.
42. Kwon BE, Kim GY, Son YJ, Roh YS, You MA. Quality of life of women with urinary incontinence: a systematic literature review. *Int Neurourol J.* 2010;14(3):133–8.
43. Luckett T, King M, Butow P, Friedlander M, Paris T. Assessing health-related quality of life in gynecologic oncology: a systematic review of questionnaires and their ability to detect clinically important differences and change. *Int J Gynecol Cancer.* 2010;20(4):664–84.
44. Palfreyman SJ, Shackley P, Brazier JE. Assessing current health-related quality of life questionnaires administered to patients with venous ulcers: Can they be used in economic evaluations? Vol. 19, *Journal of Clinical Nursing.* 2010. p. 892–7.
45. Palfreyman SJ, Tod AM, Brazier JE, Michaels JA, SJ P, AM T, et al. A systematic review of health-related quality of life instruments used for people with venous ulcers: an assessment of their suitability and psychometric properties. *J Clin Nurs.* 2010;19(19–20):2673–703.
46. Passarelli P, Stefano SC, Blay SL. Validity Studies of Quality of Life Instruments for Eating Disorders. *J Nerv Ment Dis.* 2010;198(12):854–9.
47. Riordain RN, McCreary C. The use of quality of life measures in oral medicine: A review of the literature. *Oral Dis.* 2010;16(5):419–30.
48. Speight J, Howarth A. Quality of life in restless legs syndrome: A systematic review of clinical trials and a critical review of instruments. Vol. 3, *The Patient.* 2010. p. 185–203.
49. Street J, Lenehan B, Berven S, Fisher C. Introducing a New Health-Related Quality of Life Outcome Tool for Metastatic Disease of the Spine. *Spine (Phila Pa 1976).* 2010;35(14):1377–86.
50. Zeng YC, Ching SSY, Loke AY. Quality of life measurement in women with cervical cancer: implications for Chinese cervical cancer survivors. Vol. 8, *Health and Quality of Life Outcomes.* 2010. p. 30.
51. Carlton J, Kaltenthaler E. Amblyopia and quality of life: a systematic review. *Eye.* 2011;25(4):403–13.
52. Carlton J, Kaltenthaler E. Health-related quality of life measures (HRQoL) in patients with amblyopia and strabismus: A systematic review. *Br J Ophthalmol.* 2011;95(3):325–30.
53. da Silva SA, Passos SRL, Carballo MT, Figueiró M. Quality of Life Assessment after Acute Coronary Syndrome : Systematic Review. *Arq Bras Cardiol.* 2011;97(6):526–40.
54. Eckstein DA, Wu RL, Akinbiyi T, Silver L, Taub PJ. Measuring Quality of Life in Cleft Lip and Palate Patients. *Plast Reconstr Surg.* 2011;128(5):518e–526e.
55. Fayed N, Schiariti V, Bostan C, Cieza A, Klassen A. Health status and QOL instruments used in childhood cancer research: deciphering conceptual content using World Health Organization definitions. *Qual Life Res.* 2011;20(8):1247–58.
56. Glover C, Banks P, Carson A, Martin CR, Duffy T. Understanding and Assessing the Impact of Alcoholism on Quality of Life. *Patient.* 2011;4(1):10–30.
57. González-Consuegra RV, Verdú J. Quality of life in people with venous leg ulcers: An integrative review. *J Adv Nurs.* 2011;67(5):926–44.
58. Hounsome N, Orrell M, Edwards RT. EQ-5D as a quality of life measure in people with dementia and their carers: evidence and key issues. *Value Heal.* 2011;14(2):390–9.
59. Janssen MF, Lubetkin EI, Sekhobo JP, Pickard AS. The use of the EQ-5D preference-based health status measure in adults with Type 2 diabetes mellitus. *Diabet Med.* 2011;28(4):395–413.
60. Kowal-Bielecka O, Avouac J, Pittrow D, Huscher D, Behrens F, Denton CP, et al. Analysis of the validation status of quality of life and functional disability measures in pulmonary arterial hypertension related to systemic sclerosis: Results of a systematic literature analysis by the expert panel on outcomes measures in pulmonary art. *J Rheumatol.* 2011;38(11):2419–27.
61. Lien K, Zeng L, Nguyen J, Cramarossa G, Culleton S, Caissie A, et al. Comparison of the EORTC QLQ-C15-PAL and the FACIT-Pal for assessment of quality of life in patients with advanced cancer. *Expert Rev Pharmacoecon Outcomes Res.* 2011;11(5):541–6.



- 1 62. Lockett T, King MT, Butow PN, Oguchi M, Rankin N, Price MA, et al. Choosing between the EORTC QLQ-C30 and FACT-G for measuring health-related quality of life in cancer clinical research: Issues, evidence and recommendations. *Ann Oncol*. 2011;22(10):2179–90.
- 2 63. Mordiffi SZ, Kin YW, NK EA. Quality of life tools for adult patients with cancer undergoing chemotherapy: a systematic review. *JBI*. 2011;9(57):2482–532.
- 3 64. Noyes J, Edwards RT. EQ-5D for the assessment of health-related quality of life and resource allocation in children: A systematic methodological review. *Value Heal*. 2011;14(8):1117–29.
- 4 65. Papaioannou D, Brazier J, Parry G. How valid and responsive are generic health status measures, such as EQ-5D and SF-36, in Schizophrenia? A systematic review. *Value Heal*. 2011;14(6):907–20.
- 5 66. Reavey PL, Klassen AF, Cano SJ, McCarthy C, Scott A, Rubin JP, et al. Measuring quality of life and patient satisfaction after body contouring: a systematic review of patient-reported outcome measures. *Aesthetic Surg J*. 2011;31(7):807–13.
- 6 67. Schiariti V, Fayed N, Cieza A, Klassen A, O'Donnell M. Content comparison of health-related quality of life measures for cerebral palsy based on the International Classification of Functioning. Vol. 33, *Disability and Rehabilitation*. Informa Healthcare; 2011. p. 1330–9.
- 7 68. Tayyem R, Ali A, Atkinson J, Martin CR. Analysis of Health-Related Quality-of-Life Instruments Measuring the Impact of Bariatric Surgery. *Patient*. 2011;4(2):73–87.
- 8 69. Whitehurst DGT, Bryan S, Lewis M. Systematic review and empirical comparison of contemporaneous EQ-5D and SF-6D group mean scores. *Med Decis Making*. 2011;31(6):E34–44.
- 9 70. Wilson JR, Hashimoto RE, Dettori JR, Fehlings MG. Spinal cord injury and quality of life: a systematic review of outcome measures. *Evid Based Spine Care J*. 2011;2(1):37–44.
- 10 71. Bhatt JK, Thomas S, Nanjan MJ. Health outcome measures for diabetes mellitus: A review. Vol. 7, *Applied Research in Quality of Life*. Springer; 2012. p. 413–43.
- 11 72. Chopra I, Kamal KM. A systematic review of quality of life instruments in long-term breast cancer survivors. *Health Qual Life Outcomes*. 2012;10(1):1–15.
- 12 73. Cormier JN, Cromwell DD, Ross MI. Health-related quality of life in patients with melanoma: overview of instruments and outcomes. *Dermatol Clin*. 2012;30(2):245–54.
- 13 74. Correia FR, De Carlo MMR do P. Evaluation of quality of life in a palliative care context: an integrative literature review. *Rev Lat Am Enfermagem*. 2012;20(2):401–10.
- 14 75. Gräske J, Fischer T, Kuhlmeier A, Wolf-Ostermann K. Dementia-Specific Quality of Life Instruments and Their Appropriateness in Shared-Housing Arrangements-A Literature Study. *Geriatr Nurs (Minneapolis)*. 2012;33(3):204–16.
- 15 76. Ho AL, Scott AM, Klassen AF, Cano SJ, Pusic AL, Van Laeken N. Measuring Quality of Life and Patient Satisfaction in Facial Paralysis Patients. *Plast Reconstr Surg*. 2012 Jul;130(1):91–9.
- 16 77. Hogg FRA, Peach G, Price P, Thompson MM, Hinchliffe RJ. Measures of health-related quality of life in diabetes-related foot disease: A systematic review. *Diabetologia*. 2012;55(3):552–65.
- 17 78. Luquiens A, Reynaud M, Falissard B, Aubin HJ. Quality of life among alcohol-dependent patients: How satisfactory are the available instruments? A systematic review. Vol. 125, *Drug and Alcohol Dependence*. 2012. p. 192–202.
- 18 79. Madureira MM, Ciconelli RM, Pereira RMR. Quality of life measurements in patients with osteoporosis and fractures. *Clinics*. 2012;67(11):1315–20.
- 19 80. Milne A, Johnson JA, Tennant M, Rudniski C, Dryden DM. Measuring Health-Related Quality of Life for Patients With Diabetic Retinopathy. *Technol Assess*. 2012;267–309.
- 20 81. Ojo B, Genden EM, Teng MS, Milbury K, Misisukiewicz KJ, Badr H. A systematic review of head and neck cancer quality of life assessment instruments. *Oral Oncol*. 2012;48(10):92–937.
- 21 82. Popovic M, Nguyen J, Chen E, Di Giovanni J, Zeng L, Chow E. Comparison of the EORTC QLQ-BM22 and the FACT-BP for assessment of quality of life in cancer patients with bone metastases. *Expert Rev Pharmacoeconomics Outcomes Res*. 2012;12(2):213–9.
- 22 83. Quintanilla-Dieck L, Litvack JR, Made JC, Smith TL. Comparison of disease-specific quality-of-life instruments in the assessment of chronic rhinosinusitis. *Int Forum Allergy Rhinol*. 2012;2(6):437–43.
- 23 84. Rajmil L, Roizen M, Psy AU, Hidalgo-Rasmussen C, Fernandez G, Dapuerto JJ. Health-related quality of life measurement in children and adolescents in Ibero-American countries, 2000 to 2010. *Value Heal*. 2012;15(2):312–22.
- 24 85. Shin H, Shin HS. Measurement of quality of life in menopausal women: a systematic review. *West J Nurs Res*. 2012;34(4):475–503.
- 25 86. Smith SC, Lamping DL, Maclaine GDH. Measuring health-related quality of life in diabetic peripheral neuropathy: a systematic review. *Diabetes Res Clin Pract*. 2012;96(3):261–70.
- 26 87. Tosh J, Brazier J, Evans P, Longworth L. A review of generic preference-based measures of health-related quality of life in visual disorders. *Value Heal*. 2012;15(1):118–27.
- 27 88. Townsend-White C, Pham ANT, Vassos M V. Review: a systematic review of quality of life measures for people with intellectual disabilities and challenging behaviours. *J Intellect Disabil Res*. 2012;56(3):270–84.
- 28 89. Walker H, Tulloch L, Martin C. Are they worth it? A systematic review of QOL instruments for use with mentally disordered offenders who have a diagnosis of psychosis. Vol. 14, *The British Journal of Forensic Practice*. 2012. p. 252–68.
- 29 90. Whitehurst DGT, Noonan VK, Dvorak MFS, Bryan S. A review of preference-based health-related quality of life questionnaires in spinal cord injury research. *Spinal Cord*. 2012;50(9):646–54.
- 30 91. Yip WK, Mordiffi SZ, Ang E. Reliability, validity and feasibility of quality of life instruments for adult patients with cancer undergoing chemotherapy: Result from a systematic review. *Int J Evid Based Healthc*. 2012;10(1):27–52.
- 31 92. Al Sayah F, Ishaque S, Lau D, Johnson JA. Health related quality of life measures in Arabic speaking populations: A systematic review on cross-cultural adaptation and measurement properties. *Qual Life Res*. 2013;22(1):213–29.

93. Basra MKA, Gada V, Ungaro S, Finlay AY, Salek SM. Infants' Dermatitis Quality of Life Index: a decade of experience of validation and clinical application. *Br J Dermatol*. 2013;169(4):760–8.
94. Castelino M, Abbott J, McElhone K, Teh LS. Comparison of the psychometric properties of health-related quality of life measures used in adults with systemic lupus erythematosus: A review of the literature. *Rheumatology*. 2013;52(4):684–96.
95. Chandratre P, Roddy E, Clarson L, Richardson J, Hider SL, Mallen CD. Health-related quality of life in gout: A systematic review. *Rheumatology*. 2013;52(11):2031–40.
96. Chow MYK, Morrow AM, Cooper Robbins SC, Leask J. Condition-specific quality of life questionnaires for caregivers of children with pediatric conditions: A systematic review. *Qual Life Res*. 2013;22(8):2183–200.
97. Davis S, Wailoo A. A review of the psychometric performance of the EQ-5D in people with urinary incontinence. *Health Qual Life Outcomes*. 2013;11:20.
98. de Almeida JR, Witterick IJ, Gullane PJ, Gentili F, Lohfeld L, Ringash J, et al. Quality of life instruments for skull base pathology: Systematic review and methodologic appraisal. *Head Neck*. 2013;36(10):1391.
99. Djan R, Penington A. A systematic review of questionnaires to measure the impact of appearance on quality of life for head and neck cancer patients. *J Plast Reconstr Aesthetic Surg*. 2013;66(5):647–59.
100. Gakhar H, Kamalli A, Holodniy M. Health-related Quality of Life Assessment after Antiretroviral Therapy: A Review of the Literature. *Drugs*. 2013;73(7):651–72.
101. Hitzig SL, Balioussis C, Nussbaum E, McGillivray CF, Catharine Craven B, Noreau L. Identifying and classifying quality-of-life tools for assessing pressure ulcers after spinal cord injury. *J Spinal Cord Med*. 2013;36(6):600–15.
102. Jabir S. Assessing Improvement in Quality of Life and Patient Satisfaction following Body Contouring Surgery in Patients with Massive Weight Loss: A Critical Review of Outcome Measures Employed. *Plast Surg Int*. 2013;
103. Lee EH, Klassen AF, Nehal KS, Cano SJ, Waters J, Pusic AL. A systematic review of patient-reported outcome instruments of nonmelanoma skin cancer in the dermatologic population. *J Am Acad Dermatol*. 2013;69(2):e59–67.
104. Levterova BA, Dimitrova DD, Levterov GE, Dragova EA. Instruments for Disease-Specific Quality-of-Life Measurement in Patients with Type 2 Diabetes Mellitus - A Systematic Review / Инструменты Для Оценки Специфического Качества Жизни Пациентов, Больных Сахарным Диабетом Типа 2. *Folia Med (Plovdiv)*. 2013;55(1):83–92.
105. Li C, Tsoi EWS, Zhang AL, Chen S, Wang CKJ. Psychometric properties of self-reported quality of life measures for people with intellectual disabilities: A systematic review. Vol. 25, *Journal of Developmental and Physical Disabilities*. Springer; 2013. p. 253–70.
106. Lin FJ, Longworth L, Pickard AS. Evaluation of content on EQ-5D as compared to disease-specific utility measures. *Qual Life Res*. 2013;22(4):853–74.
107. Mitera G, Zeiadin N, Sahgal A, Finkelstein J, Chow E, Loblaw A. Quality of life measures used in radiation therapy trials for patients with Metastatic Spinal Cord Compression (MSCC). In: *Advanced Cancer*. 2013. p. 97–106.
108. Mogos MF, August EM, Salinas-Miranda AA, Sultan DH, Salihi HM. A Systematic Review of Quality of Life Measures in Pregnant and Postpartum Mothers. *Appl Res Qual Life*. 2013;8(2):219–50.
109. Mousavi SA, Masoumi SZ, Keramat A, Pooralajal J, Shobeiri F, Abbas Mousavi S, et al. Assessment of Questionnaires Measuring Quality of Life in Infertile Couples: A Systematic Review. *J Reprod Infertil*. 2013 Jul;14(3):110–9.
110. Moyle W, Murfield JE. Health-related quality of life in older people with severe dementia: challenges for measurement and management. *Expert Rev Pharmacoeconomics Outcomes Res*. 2013;13(1):109–22.
111. Muzzatti B, Annunziata MA. Assessing quality of life in long-term cancer survivors: a review of available tools. *Support Care Cancer*. 2013;21(11):3143–52.
112. Paltzer J, Barker E, Witt WP. Measuring the health-related quality of life (HRQoL) of young children in resource-limited settings: a review of existing measures. *Qual Life Res*. 2013;22(6):1177–87.
113. Perales J, Cosco TD, Stephan BCM, Haro JM, Brayne C. Health-related quality-of-life instruments for Alzheimer's disease and mixed dementia. *Int Psychogeriatrics*. 2013;25(5):691–706.
114. Pusic AL, Cemal Y, Albornoz C, Klassen A, Cano S, Sulimanoff I, et al. Quality of life among breast cancer patients with lymphedema: A systematic review of patient-reported outcome instruments and outcomes. *J Cancer Surviv*. 2013;7(1):83–92.
115. Roncada C, Mattiello R, Pitrez PM, Sarria EE. Specific instruments to assess quality of life in children and adolescents with asthma. *J Pediatr (Rio J)*. 2013;89(3):217–25.
116. Salek MS, Jung S, Brincat-Ruffini LA, MacFarlane L, Lewis-Jones MS, Basra MKA, et al. Clinical experience and psychometric properties of the Children's Dermatology Life Quality Index (CDLQI), 1995-2012. *Br J Dermatol*. 2013;169(4):734–59.
117. Testart J, Richieri R, Caqueo-Urizar A, Lancon C, Auquier P, Boyer L. Quality of life and other outcome measures in caregivers of patients with schizophrenia. *Expert Rev Pharmacoeconomics Outcomes Res*. 2013;13(5):641–9.
118. Weldam SWM, Schuurmans MJ, Liu R, Lammers JWW. Evaluation of Quality of Life instruments for use in COPD care and research: A systematic review. *Int J Nurs Stud*. 2013;50(5):688–707.
119. Wheelwright S, Darlington A-S, Hopkinson JB, Fitzsimmons D, White A, Johnson CD. A systematic review of health-related quality of life instruments in patients with cancer cachexia. *Support Care Cancer*. 2013;21(9):2625–36.
120. Yang Y, Longworth L, Brazier J. An assessment of validity and responsiveness of generic measures of health-related quality of life in hearing impairment. Vol. 22, *Quality of Life Research*. 2013. p. 2813–28.
121. Anthony SJ, Selkirk E, Sung L, Klaassen RJ, Dix D, Scheinmann K, et al. Considering quality of life for children with cancer: a systematic review of patient-reported outcome measures and the development of a conceptual model. *Qual Life Res*. 2014;23(3):771–89.
122. Aspden T, Bradshaw SA, Playford ED, Riazi A. Quality-of-life measures for use within care homes: A systematic review of their measurement properties. *Age Ageing*. 2014;43(5):596–603.
123. Balioussis C, Hitzig S, Flett H, Noreau L, Craven B. Identifying and Classifying Quality of Life Tools for Assessing Spasticity After Spinal Cord Injury. *Top Spinal Cord Inj Rehabil*. 2014;20(3):208–24.

124. Brazier J, Connell J, Papaioannou D, Mukuria C, Mulhern B, Peasgood T, et al. A systematic review, psychometric analysis and qualitative assessment of generic preference-based measures of health in mental health populations and the estimation of mapping functions from widely used specific measures. *Health Technol Assess (Rockv)*. 2014;18(34):1–188.
125. Chiu L, Chiu N, Chow E, Cella D, Beaumont JL, Lam H, et al. Comparison of Three Shortened Questionnaires for Assessment of Quality of Life in Advanced Cancer. *J Palliat Med*. 2014;17(8):918–23.
126. Chow R, Lao N, Popovic M, Chow E, Cella D, Beaumont J, et al. Comparison of the EORTC QLQ-BN20 and the FACT-Br quality of life questionnaires for patients with primary brain cancers: a literature review. *Support Care Cancer*. 2014;22(9):2593–8.
127. Garin O, Herdman M, Vilagut G, Ferrer M, Ribera A, Rajmil L, et al. Assessing health-related quality of life in patients with heart failure: a systematic, standardized comparison of available measures. *Heart Fail Rev*. 2014;19(3):359–67.
128. Gilchrist F, Rodd H, Deery C, Marshman Z. Assessment of the quality of measures of child oral health-related quality of life. *BMC Oral Health*. 2014;14:40.
129. Grubbs JR, Tolleson-Rinehart S, Huynh K, Davis RM. A review of Quality of Life Measures in Dry Eye Questionnaires. 2014;33(2):215–8.
130. Gupta N, Pinto LM, Morogan A, Bourbeau J. The COPD assessment test: a systematic review. *Eur Respir J*. 2014;44(4):873–84.
131. Hawkins AT, Henry AJ, Crandell DM, Nguyen LL. A systematic review of functional and quality of life assessment after major lower extremity amputation. *Ann Vasc Surg*. 2014;28(3):763–80.
132. Hewison A, Mccaughan D, Watt I. An evaluative review of questionnaires recommended for the assessment of quality of life and symptom severity in women with urinary incontinence. *J Clin Nurs*. 2014;23(21–22):2998–3011.
133. Ikeda E, Hinckson E, Krageloh C. Assessment of quality of life in children and youth with autism spectrum disorder: a critical review. *Qual Life Res*. 2014;23(4):1069–85.
134. Jardine J, Glinianaia S V, McConachie H, Embleton ND, Rankin J. Self-reported quality of life of young children with conditions from early infancy: a systematic review. *Pediatrics*. 2014;134(4):e1129–48.
135. Kuspinar A, Mayo NE. A review of the psychometric properties of generic utility measures in multiple sclerosis. Vol. 32, *Pharmacoeconomics*. Springer; 2014. p. 759–73.
136. Lee J, Kim SH, Moon SH, Lee EH. Measurement properties of rheumatoid arthritis-specific quality-of-life questionnaires: systematic review of the literature. *Qual Life Res*. 2014;23(10):2779–91.
137. Lieu JEC, Chalivendra V, Ead B. Pediatric quality of life in children with otolaryngologic disease: what inventories are available and what is still needed? *Curr Opin Otolaryngol Head Neck Surg*. 2014;22(6):506–20.
138. Longworth L, Yang Y, Young T, Mulhern B, Hernández Alava M, Mukuria C, et al. Use of generic and condition-specific measures of health-related quality of life in NICE decision-making: A systematic review, statistical modelling and survey. *Health Technol Assess (Rockv)*. 2014;18(9):1–224.
139. Makai P, Brouwer WBF, Koopmanschap MA, Stolk EA, Nieboer AP. Quality of life instruments for economic evaluations in health and social care for older people: a systematic review. *Soc Sci Med*. 2014;102:83–93.
140. Niu H-Y, Niu C-Y, Wang J-H, Zhang Y, He P. Health-related quality of life in women with breast cancer: a literature-based review of psychometric properties of breast cancer-specific measures. *Asian Pacific J Cancer Prev*. 2014;15(8):3533–6.
141. Salvilla SA, Dubois AEJ, Flokstra-De Blok BMJ, Panesar SS, Worth A, Patel S, et al. Disease-specific health-related quality of life instruments for IgE-mediated food allergy. *Allergy*. 2014;69(7):834–44.
142. Schmidt S, Garin O, Pardo Y, Valderas JM, Alonso J, Rebollo P, et al. Assessing quality of life in patients with prostate cancer: a systematic and standardized comparison of available instruments. *Qual Life Res*. 2014 Oct;23(8):2169–81.
143. Smith AB, Cocks K, Taylor M, Parry D. Most domains of the European Organisation for Research and Treatment of Cancer Quality of Life Questionnaire C30 are reliable. *J Clin Epidemiol*. 2014;67(8):952–7.
144. Souza JGS, Pamponet MA, Souza TCS, Pereira AR, Souza AGS, Martins AME d. BL. Tools used for evaluation of Brazilian children’s quality of life. *Rev Paul Pediatr*. 2014;32(2):272–8.
145. Swigris JJ, Esser D, Conoscenti CS, Brown KK. The psychometric properties of the St George’s Respiratory Questionnaire (SGRQ) in patients with idiopathic pulmonary fibrosis: a literature review. *Health Qual Life Outcomes*. 2014;12:124.
146. Timmerman AA, Speyer R, Heijnen BJ, Klijn-Zwijenberg IR. Psychometric characteristics of health-related quality-of-life questionnaires in oropharyngeal dysphagia. *Dysphagia*. 2014;29(2):183–98.
147. Watt T, Cramon P, Frenzl DM, Ware JE. Assessing health-related quality of life in patients with benign non-toxic goitre. *Best Pract Res Clin Endocrinol Metab*. 2014;28(4):559–75.
148. Wolpe RE, Toriy AM, da Silveira GF, Cardoso FL, Sperandio FF. Assessing the impact of urinary incontinence on quality of life: systematic review of instruments in Portuguese. *Man Ther Posturology Rehabil J*. 2014;12(1):273–80.
149. Alrubaiy L, Rikaby I, Dodds P, Hutchings HA, Williams JG. Systematic review of health-related quality of life measures for inflammatory bowel disease. *J Crohn’s Colitis*. 2015;9(3):284–92.
150. Aspesberro F, Mangione-Smith R, Zimmerman JJ. Health-related quality of life following pediatric critical illness. *Intensive Care Med*. 2015;41(7):1235–46.
151. Bédard E, Kergoat HH, Kergoat M-J, Leclerc B-S, Bedard E, Kergoat HH, et al. Systematic review of vision-related quality of life questionnaires for older institutionalised seniors with dementia. *Ophthalmic Physiol Opt*. 2015;35(4):377–87.
152. Bowling A, Rowe G, Adams S, Sands P, Samsi K, Crane M, et al. Quality of life in dementia: a systematically conducted narrative review of dementia-specific measurement scales. *Aging Ment Health*. 2015;19(1):13–31.
153. Conijn AP, Jens S, Terwee CB, Breek JC, Koelemay MJW. Assessing the quality of available patient reported outcome measures for intermittent claudication: a systematic review using the COSMIN checklist. *Eur J Vasc Endovasc Surg*. 2015;49(3):316–34.
154. de Climens AR, Tunceli K, Arnould B, Germain N, Iglay K, Norquist J, et al. Review of patient-reported outcome instruments measuring health-related quality of life and satisfaction in patients with type 2 diabetes treated with oral therapy. *Curr Med Res Opin*. 2015 Apr;31(4):643–65.

155. Dronavalli M, Thompson SC. A systematic review of measurement tools of health and well-being for evaluating community-based interventions. Vol. 69, *Journal of Epidemiology and Community Health*. 2015. p. 805–15.
156. Hamoen EJJ, De Rooij M, Witjes JA, Barentsz JO, Rovers MM. Measuring health-related quality of life in men with prostate cancer: A systematic review of the most used questionnaires and their validity. *Urol Oncol*. 2015;33(2):69.e19-69.e28.
157. Hu H, Luan L, Li S-C. How Quality of Life as Patient-Reported Outcome Has Been Studied for Rheumatoid Arthritis in Chinese-Speaking Population. *Value Heal Reg Issues*. 2015;6:98–102.
158. Janssens A, Rogers M, Gumm R, Jenkinson C, Tennant A, Logan S, et al. Measurement properties of multidimensional patient-reported outcome measures in neurodisability: a systematic review of evaluation studies. *Dev Med Child Neurol*. 2015;58(5):437–51.
159. Launois R. Health-related quality-of-life scales specific for chronic venous disorders of the lower limbs. *J Vasc Surg Venous Lymphat Disord*. 2015;3(2):219-227.e3.
160. Monticone M, Nava C, Leggero V, Rocca B, Salvaderi S, Ferrante S, et al. Measurement properties of translated versions of the Scoliosis Research Society-22 Patient Questionnaire, SRS-22: a systematic review. *Qual Life Res*. 2015;24(8):1981–98.
161. Nguyen J, Popovic M, Chow E, Cella D, Beaumont JL, Chu D, et al. EORTC QLQ-BR23 and FACT-B for the assessment of quality of life in patients with breast cancer: A literature review. *J Comp Eff Res*. 2015;4(2):157–66.
162. Oliveira IS, da Cunha Menezes Costa L, Fagundes FRC, Cabral CMN. Evaluation of cross-cultural adaptation and measurement properties of breast cancer-specific quality-of-life questionnaires: a systematic review. *Qual Life Res*. 2015;24(5):1179–95.
163. Polinder S, Haagsma JA, van Klaveren D, Steyerberg EW, van Beeck EF. Health-related quality of life after TBI: a systematic review of study design, instruments, measurement properties, and outcome. *Popul Health Metr*. 2015;13:4.
164. Taghavi SA, Bazarganipour F, Montazeri A, Kazemnejad A, Chaman R, Khosravi A. Health-related quality of life in polycystic ovary syndrome patients: A systematic review. *Iran J Reprod Med*. 2015;13(8):473–82.
165. Treanor C, Donnelly M. A methodological review of the Short Form Health Survey 36 (SF-36) and its derivatives among breast cancer survivors. *Qual Life Res*. 2015;24(2):339–62.
166. Wong CKH, Chen J, Yu CLY, Sham M, Lam CLK. Systematic review recommends the European Organization for Research and Treatment of Cancer colorectal cancer-specific module for measuring quality of life in colorectal cancer patients. *J Clin Epidemiol*. 2015;68(3):266–78.
167. Algar K, Woods RT, Windle G. Measuring the quality of life and well-being of people with dementia: A review of observational measures. *Dementia*. 2016;15(4):832–57.
168. Bryant AL, Walton A, Shaw-Kokot J, Mayer DK, Reeve BB. A systematic review of psychometric properties of health-related quality-of-life and symptom instruments in adult acute leukemia survivors. *Cancer Nurs*. 2016;39(5):375–82.
169. Coombes LH, Wiseman T, Lucas G, Sangha A, Murtagh FE. Health-related quality-of-life outcome measures in paediatric palliative care: A systematic review of psychometric properties and feasibility of use. *Palliat Med*. 2016;30(10):935–49.
170. Dichter MN, Schwab CGG, Meyer G, Bartholomeyczik S, Halek M. Linguistic validation and reliability properties are weak investigated of most dementia-specific quality of life measurements - A systematic review. *J Clin Epidemiol*. 2016;70:233–45.
171. Ganesh V, Agarwal A, Popovic M, Cella D, McDonald R, Vuong S, et al. Comparison of the FACT-C, EORTC QLQ-CR38, and QLQ-CR29 quality of life questionnaires for patients with colorectal cancer: a literature review. *Support Care Cancer*. 2016;24(8):3661–8.
172. Gutiérrez-Vargas R, Díaz-García ML, Villasis-Keever MÁ, Portilla-Robertson J, Zapata-Tárres M. Instruments to measure the quality of life in patients with oral mucositis undergoing oncological treatment: a systematic review of the literature. *Bol Med Hosp Infant Mex*. 2016;73(6):457–66.
173. Hand C. Measuring health-related quality of life in adults with chronic conditions in primary care settings. *Canadian Family Physician*. *Can Fam Physician*. 2016;62(7):375–83.
174. Heindl D, Prinsen CAC, Deckert S, Chalmers JR, Drucker AM, Ofenloch R, et al. Measurement properties of adult quality-of-life measurement instruments for eczema: a systematic review. *Allergy*. 2016;71(3):358–70.
175. Kotecha D, Ahmed A, Calvert M, Lencioni M, Terwee CB, Lane DA. Patient-Reported Outcomes for Quality of Life Assessment in Atrial Fibrillation: A Systematic Review of Measurement Properties. *PLoS One*. 2016;11(11):e0165790.
176. Lee J, Lee E-H, Moon SH. A systematic review of measurement properties of the instruments measuring health-related quality of life in patients with irritable bowel syndrome. *Qual Life Res*. 2016;25(12):2985–95.
177. Maratia S, Cedillo S, Rejas J. Assessing health-related quality of life in patients with breast cancer: a systematic and standardized comparison of available instruments using the EMPRO tool. *Qual Life Res*. 2016;25(10):2467–80.
178. Mestre TA, van Duijn E, Davis AM, Bachoud-Lévi AC, Busse M, Anderson KE, et al. Rating scales for behavioral symptoms in Huntington's disease: Critique and recommendations. *Mov Disord*. 2016;31(10):1466–78.
179. Spinou A, Fragkos KC, Lee KK, Elston C, Siegert RJ, Loebinger MR, et al. The validity of health-related quality of life questionnaires in bronchiectasis: a systematic review and meta-analysis. *Thorax*. 2016;71(8):683–94.
180. Tapia VJ, Epstein S, Tolmach OS, Hassan AS, Chung NN, Gosman AA. Health-related quality-of-life instruments for pediatric patients with diverse facial deformities: A systematic literature review. *Plast Reconstr Surg*. 2016;138(1):175–87.
181. Wong CKH, Lang BHH, Lam CLK. A systematic review of quality of thyroid-specific health-related quality-of-life instruments recommends ThyPRO for patients with benign thyroid diseases. *J Clin Epidemiol*. 2016;78:63–72.
182. Woo A, Fu T, Popovic M, Chow E, Cella D, Wong CS, et al. Comparison of the EORTC STO-22 and the FACT-Ga quality of life questionnaires for patients with gastric cancer. *Ann Palliat Med*. 2016;5(1):13–21.
183. Ahmadi A, Tohidast SA, Mansuri B, Kamali M, Krishnan G. Acceptability, reliability, and validity of the Stroke and Aphasia Quality of Life Scale-39 (SAQOL-39) across languages: a systematic review. *Clin Rehabil*. 2017;31(9):1201–14.
184. Baghdadli A, Russet F, Mottron L. Measurement properties of screening and diagnostic tools for autism spectrum adults of mean normal intelligence: A systematic review. *Eur Psychiatry*. 2017;44:104–24.
185. Best KL, Ethans K, Craven BC, Noreau L, Hitzig SL. Identifying and classifying quality of life tools for neurogenic bladder function after spinal cord injury: A systematic review. *J Spinal Cord Med*. 2017;40(5):505–29.

186. Chen X-L, Zhong L-H, Wen Y, Liu T-W, Li X-Y, Hou Z-K, et al. Inflammatory bowel disease-specific health-related quality of life instruments: a systematic review of measurement properties. *Health Qual Life Outcomes*. 2017;15(1):177.
187. Frew JW, Davidson M, Murrell DF. Disease-specific health related quality of life patient reported outcome measures in Genodermatoses: a systematic review and critical evaluation. *Orphanet J Rare Dis*. 2017;12(1):189.
188. Heaney A, Stepanous J, Rouse M, McKenna SP. A review of the psychometric properties and use of the rheumatoid arthritis quality of life questionnaire (RaQoL) in clinical research. *Curr Rheumatol Rev*. 2017;13(3):197–205.
189. Heintl D, Prinsen CAC, Sach T, Drucker AM, Ofenloch R, Flohr C, et al. Measurement properties of quality-of-life measurement instruments for infants, children and adolescents with eczema: a systematic review. *Br J Dermatol*. 2017;176(4):878–89.
190. Kandel H, Khadka J, Goggin M, Pesudovs K. Patient-reported Outcomes for Assessment of Quality of Life in Refractive Error: A Systematic Review. *Optom Vis Sci*. 2017;94(12):1102–19.
191. Kao SS, Peters MDJ, Ooi EH. Pediatric tonsillectomy quality of life assessment instruments: A scoping review protocol. *Laryngoscope*. 2017;127:2399–406.
192. Khan S, Tangiisuran B, Imtiaz A, Zainal H. Health Status and Quality of Life in Tuberculosis: Systematic Review of Study Design, Instruments, Measuring Properties and Outcomes. *Heal Sci J*. 2017;11(1):1–10.
193. Kwan YH, Fong W, Tan VIC, Lui NL, Malhotra R, Østbye T, et al. A systematic review of quality-of-life domains and items relevant to patients with spondyloarthritis. *Semin Arthritis Rheum*. 2017;47(2):175–82.
194. Limperg PF, Terwee CB, Young NL, Price VE, Gouw SC, Peters M, et al. Health-related quality of life questionnaires in individuals with haemophilia: a systematic review of their measurement properties. *Haemophilia*. 2017;23(4):497–510.
195. Lucendo AJ, Arias-González L, Molina-Infante J, Arias Á. Systematic review: health-related quality of life in children and adults with eosinophilic oesophagitis-instruments for measurement and determinant factors. *Aliment Pharmacol Ther*. 2017;
196. Page TE, Farina N, Brown A, Daley S, Bowling A, Basset T, et al. Instruments measuring the disease-specific quality of life of family carers of people with neurodegenerative diseases: A systematic review. *BMJ Open*. 2017;7(3).
197. Poku E, Aber A, Phillips P, Essat M, Buckley Woods H, Palfreyman S, et al. Systematic review assessing the measurement properties of patient-reported outcomes for venous leg ulcers. *BJS open*. 2017;1(5):138–47.
198. Roydhouse J, Wilson I b. Systematic review of caregiver responses for patient health-related quality of life in adult cancer care. *Qual Life Res*. 2017;68(8):1925–54.
199. Strada L, Vanderplasschen W, Buchholz A, Schulte B, Muller AE, Verthein U, et al. Measuring quality of life in opioid-dependent people: a systematic review of assessment instruments. *Qual Life Res*. 2017;26:3187–200.
200. Sullivan KJ, Hunter Z, Andrioli V, Guerra L, Leonard M, Klassen A, et al. Assessing quality of life of patients with hypospadias: A systematic review of validated patient-reported outcome instruments. *J Pediatr Urol*. 2017;13(1):19–27.
201. Tang TS, Yusuf FLA, Polonsky WH, Fisher L. Assessing quality of life in diabetes: II – Deconstructing measures into a simple framework. *Diabetes Res Clin Pract*. 2017;126:286–302.
202. Tax C, Steenbergen ME, Zusterzeel PLM, Bekkers RLM, Rovers MM. Measuring health-related quality of life in cervical cancer patients: a systematic review of the most used questionnaires and their validity. *BMC Med Res Methodol*. 2017;17(1):15.
203. Xin Y, Mcintosh E. Assessment of the construct validity and responsiveness of preference-based quality of life measures in people with Parkinson's: a systematic review. *Qual Life Res*. 2017;26(1):1–23.
204. Aber A, Lumley E, Phillips P, Woods HB, Jones G, Michaels J. Themes that Determine Quality of Life in Patients with Peripheral Arterial Disease: A Systematic Review. *Patient*. 2018;11(5):489–502.
205. Chiarotto A, Terwee CB, Kamper SJ, Boers M, Ostelo RW. Evidence on the measurement properties of health-related quality of life instruments is largely missing in patients with low back pain, a systematic review. *J Clin Epidemiol*. 2018;102:23–7.
206. Cornelissen AJ, Kool M, Keuter XH, Hetus EM, Grzymala AAP de, van der Hulst RR, et al. Concerning Quality of Life Questionnaires in Breast Cancer-Related Lymphedema Patients: Review of the Literature by Cornelissen et al. *Lymphat Res Biol*. 2018;16(2):134–9.
207. de Vries CEE, Kalf MC, Prinsen CAC, Coulman KD, den Haan C, Welbourn R, et al. Recommendations on the most suitable quality-of-life measurement instruments for bariatric and body contouring surgery: a systematic review. *Obes Rev*. 2018;19(10):1395–411.
208. Dow J, Robinson J, Robalino S, Finch T, McColl E, Robinson L. How best to assess quality of life in informal carers of people with dementia; A systematic review of existing outcome measures. *PLoS One*. 2018;13(3).
209. Grobet C, Marks M, Tecklenburg L, Audige L. Application and measurement properties of EQ-5D to measure quality of life in patients with upper extremity orthopaedic disorders: a systematic literature review. *Arch Orthop Trauma Surg*. 2018;138:953–61.
210. Haywood KL, Pearson N, Morrison LJ, Castrén M, Lilja G, Perkins GD. Assessing health-related quality of life (HRQoL) in survivors of out-of-hospital cardiac arrest: A systematic review of patient-reported outcome measures. *Resuscitation*. 2018;123:22–37.
211. Luan L, Hu H, Li S-C. A Review of Studies of Quality of Life for Chinese-Speaking Patients with Ischemic Heart Disease. *Value Heal Reg Issues*. 2018;15:82–90.
212. Mason SJ, Catto JWF, Downing A, Bottomley SE, Glaser AW, Wright P. Evaluating patient-reported outcome measures (PROMs) for bladder cancer: a systematic review using the COnsensus-based Standards for the selection of health Measurement Instruments (COSMIN) checklist. *BJU Int*. 2018;
213. Mohammed MA, Moles RJ, Chen TF. Pharmaceutical care and health related quality of life outcomes over the past 25 years: Have we measured dimensions that really matter? *Int J Clin Pharm*. 2018;40(1):3–14.
214. Mpundu-Kaambwa C, Chen G, Huynh E, Russo R, Ratcliffe J. A review of preference-based measures for the assessment of quality of life in children and adolescents with cerebral palsy. *Qual Life Res*. 2018;27(7):1781–99.
215. Pollo CF, Meneguín S, Miot HA. Evaluation Instruments for Quality of Life Related to Melasma: An Integrative Review. *Clinics*. 2018;73:e65.
216. Tian L, Cao XY. Systematic review of the psychometric properties of disease-specific, quality-of-life questionnaires for patients with hepatobiliary or pancreatic cancers. *Japan J Nurs Sci*. 2018;15(2):99–112.



- 1 217. van Ierssel J, Sveistrup H, Marshall S. Identifying the concepts contained within health-related quality of life outcome measures in concussion research using the International Classification of Functioning, Disability, and Health as a reference: a systematic review. *Qual Life Res.* 2018;27(12):3071–86.
- 2 218. van Rooij J, Fransen H, van de Poll-Franse L, Zijlstra M, Raijmakers N. Measuring health-related quality of life in patients with advanced cancer: a systematic review of self-administered measurement instruments. *Qual Life Res.* 2018;27(8):1937–55.
- 3 219. Yarlus A, Bayliss M, Cappelleri JC, Maher S, Bushmakina AG, Chen LA, et al. Psychometric validation of the SF-36® Health Survey in ulcerative colitis: results from a systematic literature review. *Qual Life Res.* 2018;27(2):273–80.
- 4 220. Yazdani N, Sharif F, Elahi N, Ebadi A, Hosseini SV. Psychometric Properties of Quality of Life Assessment Tools in Morbid Obesity: A Review of Literature. *J Evidence-based Care.* 2018;7(4):7–21.
- 5 221. Zaror C, Pardo Y, Espinoza-Espinoza G, Pont A, Munoz-Millan P, Martinez-Zapata MJ, et al. Assessing oral health-related quality of life in children and adolescents: a systematic review and standardized comparison of available instruments. *Clin Oral Investig.* 2018;
- 6 222. Hettiarachchi RM, Kularatna S, Byrnes J, Scuffham PA. Pediatric Quality of Life Instruments in Oral Health Research: A Systematic Review. *Value Heal.* 2019;22(1):129–35.
- 7 223. Balk, E. M., Gazula, A., Markozannes, G., Kimmel, H. J., Saldanha, I. J., Trikalinos, T. A., & Resnik, L. J. (2019). Psychometric Properties of Functional , Ambulatory , and Quality of Life Instruments in Lower Limb Amputees : A Systematic Review. *Archives of Physical Medicine and Rehabilitation*, 100(12), 2354–2370. <https://doi.org/10.1016/j.apmr.2019.02.015>
- 8 224. Belayneh, T. (2019). A systematic review of the psychometric properties of the cross-cultural adaptations and translations of the Prolapse Quality of Life ( P-QoL ) questionnaire. *Belayneh Abebaw Gebeyu Mulat Adefris Guri Rortveit*, 30, 1989–2000. <https://doi.org/10.1007/s00192-019-03920-1>
- 9 225. Bull, K. S., Hornsey, S., Kennedy, C. R., Darlington, A.-S. E., Grootenhuis, M. A., Hargrave, D., Liossi, C., Jonathan, P., Walker, D. A., & Morris, C. (2019). Systematic review: measurement properties of patient reported outcome measures evaluated with childhood brain tumor survivors or other acquired brain injury. *Neuro-Oncology Practice*, December. <https://doi.org/10.1093/nop/npz064>
- 10 226. Choukou, M.-A., Best, K. L., Catharine, B., & Hitzig, S. L. (2019). Identifying and Classifying Quality of Life Tools for Assessing Neurogenic Bowel Dysfunction After Spinal Cord Injury. *Spinal Cord Injury Rehabilitation*, 25(1), 1–22. <https://doi.org/10.1310/sci18-00019>
- 11 227. Daliya, P., Gemmill, E. H., Lobo, D. N., & Parsons, S. L. (2019). A systematic review of patient reported outcome measures ( PROMs ) and quality of life reporting in patients undergoing laparoscopic cholecystectomy. *Hepatobiliary Surgery and Nutrition*, 8(3), 228–245. <https://doi.org/10.21037/hbsn.2019.03.16>
- 12 228. Gabes, M., Tischer, C., & Apfelbacher, C. (2020). Measurement properties of quality - of - life outcome measures for children and adults with eczema : An updated systematic review. *Pediatric Allergy and Immunology*, 31, 66–77. <https://doi.org/10.1111/pai.13120>
- 13 229. Gondivkar, S. M., Bhowate, R. R., Gadgil, A. R., Sarode, S. C., & Gondivkar, R. S. (2019). Assessment of oral health-related quality of life instruments for oral submucous fi brosis : A systematic review using the COnsensus-based Standards for the selection of health Measurement Instruments ( COSMIN ) checklist. *Oral Oncology*, 93(January), 39–45. <https://doi.org/10.1016/j.oraloncology.2019.04.009>
- 14 230. Hasanvand, S., Rassouli, M., Mandegari, Z., & Salmani, N. (2019). A Critical Review of Instruments Measuring the Quality of Life of Cancer Patients in Iranian Studies and Their Psychometrics Properties. *Asian Pacific Journal of Cancer Prevention*, 20, 333–343. <https://doi.org/10.31557/APJCP.2019.20.2.333>
- 15 231. Hughes LJ, Farina N, Page TE, Tabet N, Banerjee S. Psychometric properties and feasibility of use of dementia specific quality of life instruments for use in care settings: a systematic review. *Int Psychogeriatrics.* 2019;1–15.
- 16 232. Hunt, C., Zahid, S., Ennis, N., Michalak, A., Masanic, C., Vaidyanath, C., Bhalerao, S., Cusimano, M. D., Baker, A., & Hunt, C. (2019). Quality of life measures in older adults after traumatic brain injury : a systematic review. *Quality of Life Research*, 28(12), 3137–3151. <https://doi.org/10.1007/s11136-019-02297-4>
- 17 233. Kamilu, S., Heather, S., Aldersey, M., Fayed, N., Kaka, B., & Okyere, C. (2019). Quality of life assessment scales in polio survivors : a scoping review. *Quality of Life Research*, 28(9), 2341–2357. <https://doi.org/10.1007/s11136-019-02185-x>
- 18 234. Lamsal, R., Finlay, B., Whitehurst, D. G. T., & Zwicker, J. D. (2019). Generic preference-based health-related quality of life in children with neurodevelopmental disorders : a scoping review. *Development Medicine and Child Neurology*, 169–177. <https://doi.org/10.1111/dmen.14301>
- 19 235. Moshki, M., Khajavi, A., Vakilian, F., Minaee, S., & Hashemizadeh, H. (2019). The content comparison of health-related quality of life measures in heart failure based on the international classification of functioning , disability , and health : a systematic review. *Tabriz University of Medical Sciences*, 11(3), 167–175. <https://doi.org/10.15171/jcvtr.2019.29>
- 20 236. Speyer R, Kim JH, Doma K, Chen YW, Denman D, Phyland D, et al. Measurement properties of self-report questionnaires on health-related quality of life and functional health status in dysphonia: a systematic review using the COSMIN taxonomy. *Qual Life Res.* 2019;28(2):283–96.
- 21 237. van der Hout A, Neijenhuis KI, Jansen F, van Uden-Kraan C, Aaronson NK, Groenvold M, et al. Supportive Care in Cancer Measuring Health-Related Quality of Life in Colorectal Cancer Patients : Systematic Review of Measurement Properties of the EORTC QLQ-CR29. *Support Care Cancer.* 2019;
- 22 238. Vasconcelos Neto JA, Vasconcelos CTM, Karbage SAL, Farias HDCDAR, Machado SGDM, Saboia DM. Quality of Life in Women with Defecatory Dysfunctions: Systematic Review of Questionnaires Validated in the Portuguese Language. *Rev Bras Ginecol e Obstet.* 2019;41(3):191–8.

- 1  
2 239 Crudgington, H., Pal, D. K., Rogers, M., Morris, C., & Morris, H. (2020). Epilepsy-specific patient-reported outcome measures of children ' s health-related quality of life : A systematic review of measurement properties. *Epilepsia*, 61, 230–248.  
3 <https://doi.org/10.1111/epi.16430>
- 4 240 Furtado, R., Macdermid, J. C., Nazari, G., Bryant, D. M., Faber, K. J., & Athwal, G. S. (2020). Cross-cultural adaptations and measurement properties of the WORC (Western Ontario rotator cuff index ): a systematic review. *Health and Quality of Life Outcomes*, 9, 1–9. <https://doi.org/10.1186/s12955-020-1276-9>
- 5  
6 241 Jones, F. J. S., Ezzeddine, F. L., Herman, S. T., Buchhalter, J., Fureman, B., & Moura, L. M. V. R. (2020). A feasibility assessment of functioning and quality-of-life patient-reported outcome measures in adult epilepsy clinics : A systematic review. *Epilepsy & Behavior*, 102, 106704. <https://doi.org/10.1016/j.yebeh.2019.106704>
- 7  
8 242 Killian, M. O., Triplett, K. N., Masood, S. S., Boehler, J., & Mayersohn, G. S. (2020). Measurement of health - related quality of life in pediatric organ transplantation recipients : a systematic review of the PedsQL transplant module. *Quality of Life Research*, 29(5), 1137–1146. <https://doi.org/10.1007/s11136-019-02398-0>
- 9  
10 243 Losada-Puente, L., Araujo, A. M., & Muñoz-Cantero, J. M. (2020). A Systematic Review of the Assessment of Quality of Life in Adolescents. *Social Indicators Research*, 147(3), 1039–1057. <https://doi.org/10.1007/s11205-019-02171-3>
- 11 244 Møller, A., Bissenbakker, K. H., Arreskov, A. B., & Brodersen, J. (2020). Specific Measures of Quality of Life in Patients with Multimorbidity in Primary Healthcare : A Systematic Review on Patient-Reported Outcome Measures ' Adequacy of Measurement. *Patient Related Outcome Measures*, 11, 1–10. <https://doi.org/10.2147/PROM.S226576>
- 12  
13 245 Qian, X., Lee, R., Tan, Y., Hsiang, L., & Nan, C. (2020). Measurement Properties of Commonly Used Generic Preference - Based Measures in East and South - East Asia : A Systematic Review. *Pharmacoeconomics*, 38(2), 159–170. <https://doi.org/10.1007/s40273-019-00854-w>
- 14  
15 246 Santana-Berlanga, N. R., Porcel-Gálvez, A. M., Botello-Hermosa, A., & Barrientos-Trigo, S. (2020). Instruments to measure quality of life in institutionalised older adults : Systematic review. *Geriatric Nursing*, 000. <https://doi.org/10.1016/j.gerinurse.2020.01.018>
- 16  
17  
18  
19  
20  
21  
22  
23  
24  
25  
26  
27  
28  
29  
30  
31  
32  
33  
34  
35  
36  
37  
38  
39  
40  
41  
42  
43  
44  
45  
46



## Supplementary File S3. Tools to assess measurement properties.

**<sup>1</sup>Consensus-based Standards for the selection of health Measurement Instruments (COSMIN) (2010, 2018)**

|                                                         |                                                                                                                                                                                                                                                                                                                                                                                                                |
|---------------------------------------------------------|----------------------------------------------------------------------------------------------------------------------------------------------------------------------------------------------------------------------------------------------------------------------------------------------------------------------------------------------------------------------------------------------------------------|
| 1. Reliability                                          | The degree to which an instrument is free from random error.                                                                                                                                                                                                                                                                                                                                                   |
| 1.1. Internal consistency                               | The degree of the interrelatedness among the items. <i>In COSMIN (2018) internal consistency is derived from internal structure evaluation.</i>                                                                                                                                                                                                                                                                |
| 1.2. Reliability                                        | Scores for patients who have not changed are the same for repeated measurement under several conditions                                                                                                                                                                                                                                                                                                        |
| 1.3. Measurement error                                  | The systematic and random error of a patient's score that is not attributed to true changes in the construct to be measured                                                                                                                                                                                                                                                                                    |
| 2. Validity                                             | The degree to which a Health Related-Patient Reported Outcome (HR-PRO) instrument measures the construct(s) it purports to measure. <i>Concept with major changes in COSMIN (2018) the definition and classification changed to content, structural, cross-cultural validity/measurement invariance, criterion, and hypothesis testing for construct validity (convergent, discriminative or known groups)</i> |
| 2.1. Content (including Face validity)                  | The degree to which the content of an HR-PRO instrument is an adequate reflection of the construct to be measured (or looks as though the items are an adequate reflection)                                                                                                                                                                                                                                    |
| 2.2. Construct (Structural, Hypothesis, Cross-cultural) | The degree to which the scores of an HR-PRO instrument are an adequate reflection of the dimensionality of the construct to be measured. Scores of an HR-PRO instrument are consistent with hypotheses. Performance of the items on a translated or culturally adapted HR-PRO instrument is an adequate reflection of the performance of the items of the original version of the HR-PRO instrument            |
| 2.3. Criterion                                          | The degree to which the scores of an HR-PRO instrument are an adequate reflection of a "gold standard"                                                                                                                                                                                                                                                                                                         |
| 3. Responsiveness                                       | The instrument's ability to detect change over time in the construct to be measured                                                                                                                                                                                                                                                                                                                            |
| 4. Interpretability                                     | The degree to which one can assign easily understood meaning to an instrument's quantitative scores. <i>A complementary attribute, not a measurement property in COSMIN (2018), plus feasibility</i>                                                                                                                                                                                                           |

**<sup>2</sup>Quality Criteria for Measurement Properties (Terwee et al. 2007)**

|                              |                                                                                                                                                                                                        |
|------------------------------|--------------------------------------------------------------------------------------------------------------------------------------------------------------------------------------------------------|
| 1. Content validity          | The extent to which the domain of interest is comprehensively sampled by the items in the questionnaire                                                                                                |
| 2. Internal consistency      | The extent to which items in a (sub)scale are inter correlated, thus measuring the same construct                                                                                                      |
| 3. Criterion validity        | The extent to which scores on a particular questionnaire relate to a gold standard                                                                                                                     |
| 4. Construct validity        | The extent to which scores on a particular questionnaire relate to other measures in a manner that is consistent with theoretically derived hypotheses concerning the concepts that are being measured |
| 5. Reproducibility           |                                                                                                                                                                                                        |
| 5.1. Agreement               | The extent which the scores on repeated measures are close to each other (absolute measurement error)                                                                                                  |
| 5.2. Reliability             | The extent to which patients can be distinguish from each other (relative measurement error)                                                                                                           |
| 6. Responsiveness            | The ability of a questionnaire to detect clinically important changes over time                                                                                                                        |
| 7. Floor and ceiling effects | The number of respondents who achieved the lowest or highest possible score                                                                                                                            |
| 8. Interpretability          | The degree to which one can assign qualitative meaning to quantitative scores                                                                                                                          |

**<sup>3</sup>Attributes and Criteria to assess Health Status and Quality of Life Instruments (1996, 2002)**

|                                         |                                                                                                                                                                                                         |
|-----------------------------------------|---------------------------------------------------------------------------------------------------------------------------------------------------------------------------------------------------------|
| 1. Conceptual and measurement model     | The rationale for a description of the concepts and the populations that a measure is intended to assess and the expected relationship between these concepts                                           |
| 2. Reliability                          | The degree to which an instrument is free from random error                                                                                                                                             |
| 2.1. Internal consistency               | The precision of a scale, homogeneity (inter correlations) of items at one point in time                                                                                                                |
| 2.2. Reproducibility                    | Stability of an instrument over time (test-retest) and inter-rater agreement                                                                                                                            |
| 3. Validity                             | The degree to which the instrument measures what it purports to measure.                                                                                                                                |
| 3.1. Content validity                   | The domain of an instrument is appropriate relative to its intended use                                                                                                                                 |
| 3.2. Construct-related validity         | Interpretation of scores based on theoretical implications associated with the construct to be measured                                                                                                 |
| 3.3. Criterion-related validity         | The extent to which scores of the instrument are related to a criterion measure (gold standard).                                                                                                        |
| 4. Responsiveness                       | The instrument's ability to detect change overtime                                                                                                                                                      |
| 5. Interpretability                     | The degree to which one can assign easily understood meaning to an instrument's quantitative scores                                                                                                     |
| 6. Respondent and administrative burden | The time, effort, and other demands placed on those to whom the instrument is administered (respondent burden) or on those who administer the instrument (administrative burden)                        |
| 7. Administration/Accessible forms      | Data collection method, including self-report, interviewer-administered, trained observer rating, computer-assisted interviewer-administered, performance-based measures. Accommodations (e.g. Braille) |
| 8. Cultural and language adaptations    | Assessment of conceptual and linguistic equivalence.                                                                                                                                                    |

<sup>1</sup>Prinsen C, Mokkink L, Bouter L, et al. COSMIN guideline for systematic reviews of Patient-Reported Outcome Measures. *Qual Life Res.* 2018;0(0):1-11. doi:10.1007/s11136-018-1798-3. Mokkink L, Terwee C, Patrick D, et al. The COSMIN study reached international consensus on taxonomy, terminology, and definitions of measurement properties for health-related patient-reported outcomes. *J Clin Epidemiol.* 2010;63(7):737-745. doi:10.1016/j.jclinepi.2010.02.006. <sup>2</sup>Terwee C, Bot S, de Boer M, et al. Quality criteria were proposed for measurement properties of health status questionnaires. *J Clin Epidemiol.* 2007;60(1):34-42. doi:10.1016/j.jclinepi.2006.03.012. <sup>3</sup>Lohr KN, Aaronson NK, Alonso J, Burnam MA, Patrick DL, Perrin EB, et al. Evaluating quality-of-life and health status instruments: Development of scientific review criteria. *Clin Ther.* 1996;18(5):979-92. Aaronson N, Alonso J, Burnam A, et al. Assessing health status and quality-of-life instruments and review criteria. *Qual Life Res.* 2002;11(3):193-215.

## Supplementary File S3. Continue

**<sup>4</sup>Health Status Measures in Economic Evaluation (1999, 2017)**

|      |                                                 |                                                                                                                                                                                             |
|------|-------------------------------------------------|---------------------------------------------------------------------------------------------------------------------------------------------------------------------------------------------|
| 1.   | Practicality                                    | Time to complete the instrument. Response rate. Rate of completion                                                                                                                          |
| 2.   | Reliability                                     | The degree to which an instrument is free from random error                                                                                                                                 |
| 2.1. | Test-retest                                     | Ability to reproduce results over repeated measurements with the minimum amount of random error                                                                                             |
| 2.2. | Inter-rater                                     | Reliability between places of administration                                                                                                                                                |
| 3.   | Validity                                        | Dimensions covered. Items relevant for population. Ability of an instrument to reflect known or expected differences and changes in health to reflect preferences.                          |
| 3.1. | Descriptive validity (Content, Face, Construct) |                                                                                                                                                                                             |
| 3.2. | Valuation                                       | Values used. Main assumptions of the model and how well the preferences of the patients and decision makers are likely to conform to these assumptions.                                     |
| 3.3. | Empirical                                       | Evidence regarding whether or not a measure could generate values which reflect people's preferences using revealed preferences; stated preferences or hypothetical preferences as criteria |

**<sup>5</sup>Guidance for Industry patient-reported outcomes measures (2006, 2009)**

|      |                                                                                                    |                                                                                                                                                                                                                     |
|------|----------------------------------------------------------------------------------------------------|---------------------------------------------------------------------------------------------------------------------------------------------------------------------------------------------------------------------|
| 1.   | Conceptual model                                                                                   | Conceptual framework.                                                                                                                                                                                               |
| 2.   | Administration/Accessible forms                                                                    | Data collection method, including self-report or interviewer, format and scoring. Adaptations for children and adolescents, patients cognitively impaired, or unable to communicate, culture and language subgroups |
| 3.   | Respondent/Administrator Burden                                                                    | Length, formatting, font size, instructions for items, privacy, time, need for physical support in responding.                                                                                                      |
| 4.   | Reliability                                                                                        |                                                                                                                                                                                                                     |
| 4.1. | Test retest                                                                                        | Stability of scores over time when no change has occurred in the concept of interest                                                                                                                                |
| 4.2. | Internal consistency                                                                               | Whether the items in a domain are inter correlated, as evidenced by an internal consistency statistic                                                                                                               |
| 4.3. | Inter interviewer reproducibility                                                                  | Agreement between responses when the PRO is administered by two or more different interviewers                                                                                                                      |
| 5.   | Validity                                                                                           |                                                                                                                                                                                                                     |
| 5.1. | Content validity                                                                                   | Whether items and response options are relevant and are comprehensive measures of the domain or concept                                                                                                             |
| 5.2. | Construct validity (Hypotheses testing, including discriminant, convergent, known groups validity) | Ability to measure the concept. Whether relationships among items, domains, and concepts conform to what is predicted by the conceptual framework for the PRO instrument itself and its validation hypotheses       |
| 6.   | Criterion                                                                                          | Scores of a PRO instrument are related to a known gold standard. When the gold standard is not possible to be evaluated, criterion measure assesses sensitivity specificity, and predictive values                  |
| 7.   | Responsiveness. Ability to detect change                                                           | Evidence that the instrument is equally sensitive to gains and losses in the measurement concept and to change at all points within the entire range expected for the clinical trial population                     |

**<sup>6</sup>Evaluating patient-based outcomes measures for use in clinical trials (1998) (Fitzpatrick's criteria)**

|        |                                        |                                                                                                                                                                                                                 |
|--------|----------------------------------------|-----------------------------------------------------------------------------------------------------------------------------------------------------------------------------------------------------------------|
| 1.     | Reliability                            | The extent to which the instrument is free from random error and may be considered as the amount of a score that is a signal rather than noise                                                                  |
| 1.1.   | Internal consistency                   | The extent to which individual items in a questionnaire scale measure the same construct (homogeneity of items in the scale)                                                                                    |
| 1.2.   | Reproducibility (test retest)          | Whether and instrument yields the same results on repeated applications, when respondents have not changed on the domain being measured. Stability of the questionnaire over time                               |
| 2.     | Validity                               | The extent to which it measures what it purports to measure                                                                                                                                                     |
| 2.1.   | Criterion and Predictive validity      | When a new measure correlates with other measures generally accepted as a more accurate variable. When the new measure correlates with future values of the criterion variable                                  |
| 2.2.   | Face and content validity              | Face validity refers to what an item appears to measure based on its manifest content. Content validity refers to how well a measurement battery covers important parts of the health components to be measured |
| 2.3.   | Construct validity                     | A health status measure is intended to assess a postulated underlying construct.                                                                                                                                |
| 2.3.1. | Convergent validity                    | Correlations are expected to be strongest with the most related constructs                                                                                                                                      |
| 2.3.2. | Discriminant validity                  | Correlations are expected to be weakest with most distally related constructs                                                                                                                                   |
| 2.3.3. | Internal structure                     | A set of assumed relationships between underlying constructs                                                                                                                                                    |
| 2.3.4. | Validity for specific purposes         | Measures need to be assessed for health status, personal preferences and utilities, and social values.                                                                                                          |
| 3.     | Responsiveness (sensitivity to change) | Ability to detect changes over time. Effect size, sensitivity and specificity of scores.                                                                                                                        |
| 4.     | Precision                              | How precise are the distinctions between levels of health and illness (sensitivity). Format categories.                                                                                                         |
| 5.     | Interpretability                       | How meaningful are the scores from an instrument                                                                                                                                                                |
| 6.     | Acceptability                          | Evidence of acceptability is associated with high response rates. Respondent burden.                                                                                                                            |
| 7.     | Cultural applicability                 | Rigorous translation can by itself establish the appropriateness of an instrument                                                                                                                               |
| 8.     | Feasibility                            | Impact of different patient-based outcome measures upon staff and researchers. Administrator burden.                                                                                                            |

**<sup>7</sup>International Classification of Functioning (ICF) & International Classification of Functioning for Children and Youth (ICFCY) (2019)**

|    |                  |                                    |
|----|------------------|------------------------------------|
| 1. | Content validity | Health and Health-related domains. |
|----|------------------|------------------------------------|

<sup>4</sup> Brazier J, Deverill M, Green C, Harper R, Booth A. A review of the use of health status measures in economic evaluation. *Health Technol Assess (Rockv)*. 1999;3(9). Brazier J, Ara R, Rowen D, Chevrou-Severac H. A Review of Generic Preference-Based Measures for Use in Cost-Effectiveness Models. *Pharmacoeconomics*. 2017;35(s1):21-31. doi:10.1007/s40273-017-0545-x. <sup>5</sup>Department of Health and Human Services. Guidance for Industry Patient-Reported Outcome Measures: Use in Medical Product Development to Support Labeling Claims; draft guidance. *Health Qual Life Outcomes*. 2006;20:1-20. doi:10.1186/1477-7525-4-79. Department of Health and Human Services. Guidance for Industry Patient-Reported Outcome Measures: Use in Medical Product Development to Support Labeling Claims.; 2009. doi:10.1111/j.1524-4733.2009.00609.x. <sup>6</sup>Fitzpatrick R, Davey C, Buxton MJ, Jones DR. Evaluating Patient-Based Outcome Measures for Use in Clinical Trials. Vol 2.; 1998. doi:9812244. <sup>7</sup>World Health Organization. International Classification of Functioning (ICF). [www.who.int/classifications/icf/en/](http://www.who.int/classifications/icf/en/).

## Supplementary File S3. Continue

**<sup>8</sup>Evaluating Measures of Patient Reported Outcomes (EMPRO) (2008)**

|      |                                                                           |                                                                                                                                                                       |
|------|---------------------------------------------------------------------------|-----------------------------------------------------------------------------------------------------------------------------------------------------------------------|
| 1.   | Conceptual and Measurement model                                          | The rationale for description of the concept and the populations that a measure is intended to assess and the relationship between these concepts                     |
| 2.   | Reliability                                                               | The degree to which an instrument is free from random error                                                                                                           |
| 2.1. | Internal consistency                                                      | The precision of a scale, based on the homogeneity of the scale's items at one point in time                                                                          |
| 2.2. | Reproducibility                                                           | The stability of an instrument over time (test retest) and inter-rater agreement at one point in time                                                                 |
| 3.   | Validity (including content, criterion, hypotheses testing and construct) | The degree to which the instrument measures what it purports to measure                                                                                               |
| 4.   | Responsiveness                                                            | The ability to detect change over time                                                                                                                                |
| 5.   | Interpretability                                                          | The degree to which one can assign meaning to an instrument's quantitative scores                                                                                     |
| 6.   | Burden (Respondent/Administrator burden)                                  | Time, effort and other demands placed on the administration of the instrument                                                                                         |
| 7.   | Administration mode                                                       | Data collection method. For each mode of administration, the information about validity, reliability, responsiveness, interpretability and burden should be assessed. |
| 8.   | Cultural and language adaptations                                         | Methods to achieve linguistic equivalence are adequately described and appropriate. Differences from the original are adequately described and appropriate.           |

**<sup>9</sup>Spinal Cord Injury Criteria (2008, 2016)**

|    |                                                                                           |                                                                                                                                                                                                                               |
|----|-------------------------------------------------------------------------------------------|-------------------------------------------------------------------------------------------------------------------------------------------------------------------------------------------------------------------------------|
| 1. | Content                                                                                   | Description. Items. Scale development. Internal structure or subscales                                                                                                                                                        |
| 2. | Administration/Accessible forms                                                           | Data collection method. Items, time, training, burden of administering. Disability adaptation (e.g. Braille)                                                                                                                  |
| 3. | Reliability (test retest, internal consistency)                                           | Degree to which an instrument is consistent or free from random error                                                                                                                                                         |
| 4. | Criterion oriented validity (concurrent, predictive, discriminant, and clinical validity) | Scale predicts other measures of the same construct. Gold standard and/or sensitivity and specificity. Scale distinguish between scores and/ or groups. Clinical utility, also called prescriptive and consequential validity |
| 5. | Responsiveness, sensitivity to change                                                     | Evidence of change in expected direction using methods such as standardized effect sizes                                                                                                                                      |
| 6. | Floor and ceiling effects                                                                 | Floor and ceiling issues can determine whether change is detected or obscured by the measure                                                                                                                                  |
| 7. | Population application (Applicability in SCI groups, languages, norms)                    | Description of use in people with spinal cord injury (vs other people). Information of norms are available. Available in other languages                                                                                      |

**<sup>10</sup>Criteria for Assessing the Tools of Disability Outcomes Research (2000) (Andresen's Tool)**

|     |                                                    |                                                                                                          |
|-----|----------------------------------------------------|----------------------------------------------------------------------------------------------------------|
| 1.  | Conceptual model                                   | Relevant domains are completely covered                                                                  |
| 2.  | Norms, standard values                             | Published data (or public-domain data) are available for both general population and with disabilities   |
| 3.  | Measurement model                                  | Tool captures the detail and breadth of real differences among persons, includes floor/ceiling effects   |
| 4.  | Instrument bias                                    | In practical or statistical terms, individual questions (or scores) are biased for the population        |
| 5.  | Respondent burden                                  | Length and content are acceptable to the intended subjects                                               |
| 6.  | Administrative burden                              | Ease to administer, score and interpret                                                                  |
| 7.  | Reliability (test retest and internal consistency) | Instrument gives a consistent answer                                                                     |
| 8.  | Validity (discriminant, convergent, structure)     | The tool measures what it purports to measure. It distinguish among different levels of mobility         |
| 9.  | Responsiveness                                     | Instrument is sensitive to changes in interventions                                                      |
| 10. | Administration/Accessible forms                    | Data collection method, as interviews, self-administration, computer surveys. Adaptations (e.g. Braille) |
| 11. | Culture/language adaptations                       | Tested versions of the tool for subgroups (including ethnicity, gender, disability)                      |

**<sup>11</sup>CanChild Outcomes Measures (2004)**

|      |                      |                                                                                                                                                                                                                                                                                          |
|------|----------------------|------------------------------------------------------------------------------------------------------------------------------------------------------------------------------------------------------------------------------------------------------------------------------------------|
| 1.   | Focus. Purpose       | Focus of measurement (using the International Classification of Functioning Framework, ICF). Rating attributes measured. List the primary purpose for which the scales have been designed (discriminative, predictive, evaluative, etc.). Describe population. Evaluation of the context |
| 2.   | Clinical utility     | Clarity of instructions, format, time to complete the assessment, administration, scoring and interpretation. Specify whether formal training is required. Cost of the manual and score sheets.                                                                                          |
| 3.   | Scale construction   | Item selection, weighting, level of measurement                                                                                                                                                                                                                                          |
| 4.   | Standardization      | Manual (published, specific procedures for administration, scoring) Norms.                                                                                                                                                                                                               |
| 5.   | Reliability          |                                                                                                                                                                                                                                                                                          |
| 5.1. | Internal consistency | The degree of homogeneity of test items to the attribute being measured. Measured at one point in time                                                                                                                                                                                   |
| 5.2. | Intra/Inter observer | Measures variation within an observer; measures variation between two or more observers                                                                                                                                                                                                  |
| 5.3. | Test retest          | Measures variation in the test over a period of time                                                                                                                                                                                                                                     |
| 6.   | Validity             |                                                                                                                                                                                                                                                                                          |
| 6.1. | Content              | The instrument is comprehensive and fully represents the domain of the characteristics it claims to measure                                                                                                                                                                              |
| 6.2. | Construct            | Measurements of the attribute conform to prior theoretical relationships among characteristics or individuals                                                                                                                                                                            |
| 6.3. | Criterion            | Measurements obtained by the instrument agree with another more accurate instrument (gold standard)                                                                                                                                                                                      |
| 6.4. | Responsiveness       | Ability to detect minimal clinically important change over the time                                                                                                                                                                                                                      |

<sup>8</sup>Valderas JM, Ferrer M, Mendivil J, et al. Development of EMPRO: A tool for the standardized assessment of patient-reported outcome measures. *Value Heal*. 2008;11(4):700-708.

doi:10.1111/j.1524-4733.2007.00309.x. <sup>9</sup>Johnston M V., Graves DE. Towards Guidelines for Evaluation of Measures: An Introduction With Application to Spinal Cord Injury. *J Spinal Cord Med*. 2016;31(1):13-26. doi:10.1080/10790268.2008.11753976. *Spinal Cord. Spinal Cord Injury Rehabilitation Evidence*. <https://scireproject.com>. <sup>10</sup>Andresen EM. Criteria for assessing the tools of disability outcomes research. *Arch Phys Med Rehabil*. 2000;81(12 SUPPL. 2):15-20. doi:10.1053/apmr.2000.20619. <sup>11</sup>Law M. Outcome Measures Rating Form Guidelines.; 2004. Available from: <https://www.canchild.ca/system/tenon/assets/attachments/000/000/371/original/measguid.pdf>

## Supplementary File S3. Continue

<sup>12</sup>Outcomes Measures in Rheumatology Clinical Trials (OMERACT) (2019)

|      |                                           |                                                                                                                                                                                                           |
|------|-------------------------------------------|-----------------------------------------------------------------------------------------------------------------------------------------------------------------------------------------------------------|
| 1.   | Truth                                     |                                                                                                                                                                                                           |
| 1.1. | Face validity (credibility)               | Overall appropriateness of the method to be used for evaluation of the outcome, as assessed by the investigators and clinicians                                                                           |
| 1.2. | Content validity (comprehensiveness)      | Ability of the outcome measure to include or predict all those components of health status that are relevant to the intervention being assessed                                                           |
| 1.3. | Criterion validity (accuracy)             | Ability of the outcome measure to reflect the best available estimate of the true clinical status of the patient. Comparison with the "gold standard"                                                     |
| 1.4. | Construct validity (convergent/divergent) | Ability of the outcome measure to match with the hypothesized expectations of the investigator when compared with other indirect assessments                                                              |
| 2.   | Discrimination                            |                                                                                                                                                                                                           |
| 2.1. | Sensitivity to change over time           | Based on calculation of the standardized response mean (SRM) using repeated measures performed in a given population at 2 different time-points without therapeutic intervention                          |
| 2.2. | Discrimination capacity over treatment    | Based on calculation of effect size (ES) in randomized controlled trials or SRM in open-label trials                                                                                                      |
| 2.3. | Reliability (reproducibility)             | Based on evaluation of intra- and interclass correlations                                                                                                                                                 |
| 3.   | Feasibility                               | The measure's ease of use, cost-effectiveness, availability in different centres, and overall usefulness. Practicalities of using the instrument, as cost, burden, length, translations, equipment needs. |

<sup>13</sup>Testing Standards (1999, 2014)

|      |                                                                                                                     |                                                                                                                                                                                                                                                   |
|------|---------------------------------------------------------------------------------------------------------------------|---------------------------------------------------------------------------------------------------------------------------------------------------------------------------------------------------------------------------------------------------|
| 1.   | Evidences of Validity                                                                                               |                                                                                                                                                                                                                                                   |
| 1.1. | Test Content                                                                                                        | Themes, tasks, format of the items, wording, and processes of administration and scoring                                                                                                                                                          |
| 1.2. | Response Processes                                                                                                  | Cognitive processes engaged in by test takers with consequences in the scores.                                                                                                                                                                    |
| 1.3. | Internal Structure<br>(Dimensionality, Differential item functioning)                                               | The degree to which the relationships among test items and components conform to the construct on which the proposed test score interpretations are based including equivalence of scores among different populations.                            |
| 1.4. | Relations to other variables<br>(Convergent, Discriminant, Criterion, nomological network including responsiveness) | The degree to which relationships with other variables are consistent with expectations derived from theory underlying the construct                                                                                                              |
| 1.5. | Consequences of testing                                                                                             | Value judgement about unintended positive and negative consequences of test use                                                                                                                                                                   |
| 2.   | Reliability                                                                                                         | <i>Revised Standard (2014) also includes Decision consistency/accuracy</i>                                                                                                                                                                        |
| 2.1. | Internal consistency, Test- retest, Alternate forms,<br><i>Scorers Consistency, Decision consistency, Accuracy</i>  | The degree to which an instrument is free from random error. The precision of a scale, homogeneity (inter correlations) of items. Replicability of the testing procedure.                                                                         |
| 3.   | Fairness                                                                                                            | Characteristics of all individuals must be considered throughout all stages of development, administration, scoring, interpretation and use of test. <i>Revised Standards (2014) emphasize the role of the Fairness as a measurement property</i> |
| 4.   | Scales, Norms and Score Comparability                                                                               | Reference points should be documented based on population norms and/or expert criteria. Linking procedures devised to guarantee comparability of different measures of similar constructs should be described                                     |
| 5.   | Test development and revision                                                                                       | Tests and their supporting documents should be periodically reviewed. New forms such as those derived from translation to other languages should be thoroughly tested for equivalence                                                             |

<sup>12</sup> OMERACT. Instrument selection for Core Outcome Measurement Sets. In: OMERACT Handbook [Internet]. 2019. Available from: <https://omeracthandbook.org/handbook>. <sup>13</sup> American Educational Research Association, American Psychological Association, National Council on Measurement in Education. Standards for Educational and Psychological Testing. American Educational Research Association.; 1999. American Educational Research Association, American Psychological Association, National Council on Measurement in Education. Standards for Educational and Psychological Testing. American Educational Research Association; 2014.



# PRISMA 2009 Checklist

| Section/topic                      | #  | Checklist item                                                                                                                                                                                                                                                                                              | Reported on page #  |
|------------------------------------|----|-------------------------------------------------------------------------------------------------------------------------------------------------------------------------------------------------------------------------------------------------------------------------------------------------------------|---------------------|
| <b>TITLE</b>                       |    |                                                                                                                                                                                                                                                                                                             |                     |
| Title                              | 1  | Identify the report as a systematic review, meta-analysis, or both.                                                                                                                                                                                                                                         | Pag 1               |
| <b>ABSTRACT</b>                    |    |                                                                                                                                                                                                                                                                                                             |                     |
| Structured summary                 | 2  | Provide a structured summary including, as applicable: background; objectives; data sources; study eligibility criteria, participants, and interventions; study appraisal and synthesis methods; results; limitations; conclusions and implications of key findings; systematic review registration number. | Pag 2               |
| <b>INTRODUCTION</b>                |    |                                                                                                                                                                                                                                                                                                             |                     |
| Rationale                          | 3  | Describe the rationale for the review in the context of what is already known.                                                                                                                                                                                                                              | Pag 5               |
| Objectives                         | 4  | Provide an explicit statement of questions being addressed with reference to participants, interventions, comparisons, outcomes, and study design (PICOS).                                                                                                                                                  | Pages 5-6           |
| <b>METHODS</b>                     |    |                                                                                                                                                                                                                                                                                                             |                     |
| Protocol and registration          | 5  | Indicate if a review protocol exists, if and where it can be accessed (e.g., Web address), and, if available, provide registration information including registration number.                                                                                                                               | Pag 6               |
| Eligibility criteria               | 6  | Specify study characteristics (e.g., PICOS, length of follow-up) and report characteristics (e.g., years considered, language, publication status) used as criteria for eligibility, giving rationale.                                                                                                      | Pag 6-7             |
| Information sources                | 7  | Describe all information sources (e.g., databases with dates of coverage, contact with study authors to identify additional studies) in the search and date last searched.                                                                                                                                  | Pag 7               |
| Search                             | 8  | Present full electronic search strategy for at least one database, including any limits used, such that it could be repeated.                                                                                                                                                                               | Supplementary File1 |
| Study selection                    | 9  | State the process for selecting studies (i.e., screening, eligibility, included in systematic review, and, if applicable, included in the meta-analysis).                                                                                                                                                   | Pag 6-7             |
| Data collection process            | 10 | Describe method of data extraction from reports (e.g., piloted forms, independently, in duplicate) and any processes for obtaining and confirming data from investigators.                                                                                                                                  | Pag 7               |
| Data items                         | 11 | List and define all variables for which data were sought (e.g., PICOS, funding sources) and any assumptions and simplifications made.                                                                                                                                                                       | Pag 7               |
| Risk of bias in individual studies | 12 | Describe methods used for assessing risk of bias of individual studies (including specification of whether this was done at the study or outcome level), and how this information is to be used in any data synthesis.                                                                                      | No applicable       |
| Summary measures                   | 13 | State the principal summary measures (e.g., risk ratio, difference in means).                                                                                                                                                                                                                               | No applicable       |
| Synthesis of results               | 14 | Describe the methods of handling data and combining results of studies, if done, including measures of consistency (e.g., $I^2$ ) for each meta-analysis.                                                                                                                                                   | No applicable       |





# PRISMA 2009 Checklist

Page 1 of 2

| Section/topic                 | #  | Checklist item                                                                                                                                                                                           | Reported on page #               |
|-------------------------------|----|----------------------------------------------------------------------------------------------------------------------------------------------------------------------------------------------------------|----------------------------------|
| Risk of bias across studies   | 15 | Specify any assessment of risk of bias that may affect the cumulative evidence (e.g., publication bias, selective reporting within studies).                                                             | No applicable                    |
| Additional analyses           | 16 | Describe methods of additional analyses (e.g., sensitivity or subgroup analyses, meta-regression), if done, indicating which were pre-specified.                                                         | No applicable                    |
| <b>RESULTS</b>                |    |                                                                                                                                                                                                          |                                  |
| Study selection               | 17 | Give numbers of studies screened, assessed for eligibility, and included in the review, with reasons for exclusions at each stage, ideally with a flow diagram.                                          | Pag 8 & Fig1(pag. 27)            |
| Study characteristics         | 18 | For each study, present characteristics for which data were extracted (e.g., study size, PICOS, follow-up period) and provide the citations.                                                             | Supplementary File 2             |
| Risk of bias within studies   | 19 | Present data on risk of bias of each study and, if available, any outcome level assessment (see item 12).                                                                                                | No applicable                    |
| Results of individual studies | 20 | For all outcomes considered (benefits or harms), present, for each study: (a) simple summary data for each intervention group (b) effect estimates and confidence intervals, ideally with a forest plot. | No applicable                    |
| Synthesis of results          | 21 | Present results of each meta-analysis done, including confidence intervals and measures of consistency.                                                                                                  | No applicable                    |
| Risk of bias across studies   | 22 | Present results of any assessment of risk of bias across studies (see Item 15).                                                                                                                          | No applicable                    |
| Additional analysis           | 23 | Give results of additional analyses, if done (e.g., sensitivity or subgroup analyses, meta-regression [see Item 16]).                                                                                    | No applicable                    |
| <b>DISCUSSION</b>             |    |                                                                                                                                                                                                          |                                  |
| Summary of evidence           | 24 | Summarize the main findings including the strength of evidence for each main outcome; consider their relevance to key groups (e.g., healthcare providers, users, and policy makers).                     | Pag 13                           |
| Limitations                   | 25 | Discuss limitations at study and outcome level (e.g., risk of bias), and at review-level (e.g., incomplete retrieval of identified research, reporting bias).                                            | Pag 4<br>(Strengths&Limitations) |
| Conclusions                   | 26 | Provide a general interpretation of the results in the context of other evidence, and implications for future research.                                                                                  | Pag 17                           |
| <b>FUNDING</b>                |    |                                                                                                                                                                                                          |                                  |
| Funding                       | 27 | Describe sources of funding for the systematic review and other support (e.g., supply of data); role of funders for the systematic review.                                                               | Pag 1, pag 20                    |

From: Moher D, Liberati A, Tetzlaff J, Altman DG, The PRISMA Group (2009). Preferred Reporting Items for Systematic Reviews and Meta-Analyses: The PRISMA Statement. PLoS Med 6(6): e1000097. doi:10.1371/journal.pmed1000097

For more information, visit: [www.prisma-statement.org](http://www.prisma-statement.org).

For peer review only - <http://bmjopen.bmj.com/site/about/guidelines.xhtml>
