# Supplementary material for: Tools to assess the measurement properties of quality of life instruments: a meta-review
Source: PubMed Central journal article supplement — BMJ Open. 2020 Aug 11;10(8):e036038. doi: 10.1136/bmjopen-2019-036038 (PMC7422655; doi:10.1136/bmjopen-2019-036038), 2020-08-11
Supplement: bmjopen-2019-036038supp002.pdf [file bmjopen-2019-036038supp002.pdf]

## S2. Characteristics and references of studies.

| ID | Year | Author            | Title                                                                                                                                                                                                          | Type of review                                                                                            | Instruments assessed | Number Instruments        | Measurement Properties |
|----|------|-------------------|----------------------------------------------------------------------------------------------------------------------------------------------------------------------------------------------------------------|-----------------------------------------------------------------------------------------------------------|----------------------|---------------------------|------------------------|
| 1  | 2008 | Barbosa & Gaviao  | Oral health-related quality of life in children: Part III. Is there agreement between parents in rating their children's oral health-related quality of life? A systematic review                              | Studies on the quality of all available validated instruments to measure HRQoL in a particular population | Both                 | More than two instruments | One specific property  |
| 2  | 2008 | Basra et al       | The Dermatology Life Quality Index 1994–2007: a comprehensive review of validation data and clinical results                                                                                                   | Studies on the quality of one instrument to measure HRQoL in general population                           | Disease-specific     | One instrument            | Multiple properties    |
| 3  | 2008 | Carabin et al     | Quality of life measurement tools for people living with HIV/AIDS.                                                                                                                                             | Studies on the quality of all available validated instruments to measure HRQoL in a particular population | Both                 | More than two instruments | Multiple properties    |
| 4  | 2008 | Chassany et al    | Systematic review: health-related quality of life (HRQOL) questionnaires in gastro-oesophageal reflux disease.                                                                                                 | Studies on the quality of all available validated instruments to measure HRQoL in a particular population | Both                 | More than two instruments | Multiple properties    |
| 5  | 2008 | El Achhab et al   | Disease-specific health-related quality of life instruments among adults diabetic: a systematic review.                                                                                                        | Studies on the quality of a selection of instruments to measure HRQoL in a particular population          | Disease-specific     | More than two instruments | Multiple properties    |
| 6  | 2008 | Finger et al      | Quality of life in age-related macular degeneration: a review of available vision-specific psychometric tools.                                                                                                 | Studies on the quality of a selection of instruments to measure HRQoL in a particular population          | Disease-specific     | More than two instruments | Multiple properties    |
| 7  | 2008 | Franic & Bothe    | Psychometric evaluation of condition-specific instruments used to assess health-related, quality of life, attitudes, and related constructs in stuttering                                                      | Studies on the quality of a selection of instruments to measure HRQoL in a particular population          | Disease-specific     | More than two instruments | Multiple properties    |
| 8  | 2008 | Janssens et al    | Health-related quality-of-life measures for long-term follow-up in children after major trauma.                                                                                                                | Studies on the quality of all available validated instruments to measure HRQoL in a particular population | Generic              | More than two instruments | Multiple properties    |
| 9  | 2008 | Klassen et al     | Clinical research in Pediatric plastic surgery and Systematic review of quality of life questionnaires                                                                                                         | Studies on the quality of a selection of instruments to measure HRQoL in a particular population          | Disease-specific     | More than two instruments | Multiple properties    |
| 10 | 2008 | Kluivers et al    | Systematic review on recovery specific quality of life instruments                                                                                                                                             | Studies on the quality of a selection of instruments to measure HRQoL in a particular population          | Disease-specific     | More than two instruments | Multiple properties    |
| 11 | 2008 | Langham et al     | Health-related quality of life instruments in studies of adult men with testosterone deficiency syndrome: a critical assessment.                                                                               | Studies on the quality of all available validated instruments to measure HRQoL in a particular population | Both                 | More than two instruments | Multiple properties    |
| 12 | 2008 | Pearce et al      | Measuring quality of life in cancer survivors: a methodological review of existing scales                                                                                                                      | Studies on the quality of a selection of instruments to measure HRQoL in a particular population          | Disease-specific     | More than two instruments | Multiple properties    |
| 13 | 2008 | Price et al       | Measures of functional status and quality-of-life in schizophrenia                                                                                                                                             | Studies on the quality of all available validated instruments to measure HRQoL in a particular population | Both                 | More than two instruments | Multiple properties    |
| 14 | 2008 | Quittner et al    | Systematic review of health-related quality of life measures for children with respiratory conditions.                                                                                                         | Studies on the quality of a selection of instruments to measure HRQoL in a particular population          | Disease-specific     | More than two instruments | Multiple properties    |
| 15 | 2008 | Reaney et al      | Understanding and assessing the impact of alcoholism on quality of life. A systematic review of the content validity of instruments used to assess health related quality of life in alcoholism                | Studies on the quality of all available validated instruments to measure HRQoL in a particular population | Both                 | More than two instruments | One specific property  |
| 16 | 2008 | Schalarman et al  | The use of health-related quality of life (HRQOL) in children and adolescents as an outcome criterion to evaluate family oriented support for young carers in Germany: an integrative review of the literature | Studies on the quality of all available validated instruments to measure HRQoL in a particular population | Generic              | More than two instruments | Multiple properties    |
| 17 | 2008 | Solans et al      | Health-related quality of life measurement in children and adolescents: A systematic review of generic and disease-specific instruments.                                                                       | Studies on the quality of all available validated instruments to measure HRQoL in a particular population | Both                 | More than two instruments | Multiple properties    |
| 18 | 2008 | Tschiesner et al  | Content comparison of quality of life questionnaires used in head and neck cancer based on the international classification of functioning, disability and health: a systematic review.                        | Studies on the quality of a selection of instruments to measure HRQoL in a particular population          | Disease-specific     | More than two instruments | One specific property  |
| 19 | 2008 | Upton et al       | Parent-child agreement across child health-related quality of life instruments: a review of the literature.                                                                                                    | Studies on the quality of all available validated instruments to measure HRQoL in a particular population | Both                 | More than two instruments | Multiple properties    |
| 20 | 2009 | Davies N.         | Measuring health-related quality of life in cancer patients.                                                                                                                                                   | Studies on the quality of all available validated instruments to measure HRQoL in a particular population | Both                 | More than two instruments | Multiple properties    |
| 21 | 2009 | Derret et al      | Outcome after injury-a systematic literature search of studies using the EQ-5D                                                                                                                                 | Studies on the quality of one instrument to measure HRQoL in general population                           | Generic              | One instrument            | Multiple properties    |
| 22 | 2009 | Epton et al       | Quality of life in amyotrophic lateral sclerosis/motor neuron disease: a structured review.                                                                                                                    | Studies on the quality of all available validated instruments to measure HRQoL in a particular population | Both                 | More than two instruments | Multiple properties    |
| 23 | 2009 | Fitzsimmons et al | A systematic review of the use and validation of health-related quality of life instruments in older cancer patients.                                                                                          | Studies on the quality of all available validated instruments to measure HRQoL in a particular population | Both                 | More than two instruments | Multiple properties    |
| 24 | 2009 | Garin et al       | Disease-specific health-related quality of life questionnaires for heart failure: A systematic review with meta-analyses.                                                                                      | Studies on the quality of a selection of instruments to measure HRQoL in a particular population          | Disease-specific     | More than two instruments | Multiple properties    |

| ID | Year | Author              | Title                                                                                                                                                                                                                  | Type of review                                                                                            | Instruments assessed | Number Instruments        | Measurement Properties |
|----|------|---------------------|------------------------------------------------------------------------------------------------------------------------------------------------------------------------------------------------------------------------|-----------------------------------------------------------------------------------------------------------|----------------------|---------------------------|------------------------|
| 25 | 2009 | Garvie et al        | Quality of life measurement in paediatric and adolescent populations with HIV: A review of the literature                                                                                                              | Studies on the quality of all available validated instruments to measure HRQoL in a particular population | Both                 | More than two instruments | Multiple properties    |
| 26 | 2009 | Guo et al           | Measuring health-related quality of life in tuberculosis: a systematic review.                                                                                                                                         | Studies on the quality of all available validated instruments to measure HRQoL in a particular population | Both                 | More than two instruments | Multiple properties    |
| 27 | 2009 | Jay et al           | A review of quality of life instruments used in liver transplantation.                                                                                                                                                 | Studies on the quality of all available validated instruments to measure HRQoL in a particular population | Both                 | More than two instruments | Multiple properties    |
| 28 | 2009 | Speight et al       | Not all roads lead to Rome-a review of quality of life measurement in adults with diabetes.                                                                                                                            | Studies on the quality of all available validated instruments to measure HRQoL in a particular population | Both                 | More than two instruments | Multiple properties    |
| 29 | 2009 | Street et al        | Health related quality of life assessment in metastatic disease of the spine: a systematic review.                                                                                                                     | Studies on the quality of all available validated instruments to measure HRQoL in a particular population | Both                 | More than two instruments | One specific property  |
| 30 | 2009 | Waters et al        | Quality of life instruments for children and adolescents with neurodisabilities: How to choose the appropriate instrument.                                                                                             | Studies on the quality of all available validated instruments to measure HRQoL in a particular population | Both                 | More than two instruments | Multiple properties    |
| 31 | 2009 | Wettergren et al    | The use, feasibility and psychometric properties of an individualised quality-of-life instrument: A systematic review of the SEIQoL-DW.                                                                                | Studies on the quality of one instrument to measure HRQoL in general population                           | Generic              | One instrument            | Multiple properties    |
| 32 | 2010 | Albers et al        | Evaluation of quality-of-life measures for use in palliative care: a systematic review.                                                                                                                                | Studies on the quality of all available validated instruments to measure HRQoL in a particular population | Both                 | More than two instruments | Multiple properties    |
| 33 | 2010 | Branski et al       | Measuring quality of life in dysphonic patients: a systematic review of content development in patient-reported outcomes measures.                                                                                     | Studies on the quality of a selection of instruments to measure HRQoL in a particular population          | Disease-specific     | More than two instruments | Multiple properties    |
| 34 | 2010 | Bronsard et al      | What are the best outcome measures for assessing quality of life in plaque type psoriasis? A systematic review of the literature.                                                                                      | Studies on the quality of all available validated instruments to measure HRQoL in a particular population | Both                 | More than two instruments | Multiple properties    |
| 35 | 2010 | Carlou et al        | A systematic review of the psychometric properties of Quality of life measures for school children with cerebral palsy                                                                                                 | Studies on the quality of a selection of instruments to measure HRQoL in a particular population          | Disease-specific     | More than two instruments | Multiple properties    |
| 36 | 2010 | Chen et al          | Measuring Quality of Life in Oncologic Breast Surgery: A Systematic Review of Patient-Reported Outcome Measures.                                                                                                       | Studies on the quality of all available validated instruments to measure HRQoL in a particular population | Both                 | More than two instruments | Multiple properties    |
| 37 | 2010 | Forhan et al        | A systematic review of the quality of psychometric evidence supporting the use of an obesity-specific quality of life measure for use with persons who have class III obesity: Diagnostic in Obesity and Complications | Studies on the quality of one instrument to measure HRQoL in a particular population                      | Disease-specific     | One instrument            | Multiple properties    |
| 38 | 2010 | Danquah et al       | Quality of life measures for patients on hemodialysis: a review of psychometric properties.                                                                                                                            | Studies on the quality of all available validated instruments to measure HRQoL in a particular population | Both                 | More than two instruments | Multiple properties    |
| 39 | 2010 | Hill et al          | Quality of life instruments and definitions in individuals with spinal cord injury: a systematic review.                                                                                                               | Studies on the quality of all available validated instruments to measure HRQoL in a particular population | Both                 | More than two instruments | Multiple properties    |
| 40 | 2010 | Kamalski et al      | Measuring disease-specific health-related quality of life to evaluate treatment outcomes in tinnitus patients: a systematic review.                                                                                    | Studies on the quality of a selection of instruments to measure HRQoL in a particular population          | Disease-specific     | More than two instruments | Multiple properties    |
| 41 | 2010 | Klassen et al       | Quality of life questionnaires for children with cancer and childhood cancer survivors: a review of the development of available measures                                                                              | Studies on the quality of all available validated instruments to measure HRQoL in a particular population | Both                 | More than two instruments | Multiple properties    |
| 42 | 2010 | Kwon et al          | Quality of life of women with urinary incontinence: a systematic literature review.                                                                                                                                    | Studies on the quality of all available validated instruments to measure HRQoL in a particular population | Both                 | More than two instruments | Multiple properties    |
| 43 | 2010 | Luckett et al       | Assessing health-related quality of life in gynecologic oncology: a systematic review of questionnaires and their ability to detect clinically important differences and change.                                       | Studies on the quality of all available validated instruments to measure HRQoL in a particular population | Both                 | More than two instruments | Multiple properties    |
| 44 | 2010 | Palfreyman et al    | Assessing current health-related quality of life questionnaires administered to patients with venous ulcers: Can they be used in economic evaluations?                                                                 | Studies on the quality of all available validated instruments to measure HRQoL in a particular population | Both                 | More than two instruments | Multiple properties    |
| 45 | 2010 | Palfreyman et al    | A systematic review of health-related quality of life instruments used for people with venous ulcers: an assessment of their suitability and psychometric properties.                                                  | Studies on the quality of all available validated instruments to measure HRQoL in a particular population | Both                 | More than two instruments | Multiple properties    |
| 46 | 2010 | Passarelli et al    | Validity Studies of Quality of Life Instruments for Eating Disorders                                                                                                                                                   | Studies on the quality of a selection of instruments to measure HRQoL in a particular population          | Disease-specific     | More than two instruments | Multiple properties    |
| 47 | 2010 | Riordain & McCreary | The use of quality of life measures in oral medicine: A review of the literature                                                                                                                                       | Studies on the quality of all available validated instruments to measure HRQoL in general population      | Both                 | More than two instruments | Multiple properties    |
| 48 | 2010 | Speight & Howarth   | Quality of life in restless legs syndrome: A systematic review of clinical trials and a critical review of instruments.                                                                                                | Studies on the quality of a selection of instruments to measure HRQoL in a particular population          | Disease-specific     | More than two instruments | Multiple properties    |
| 49 | 2010 | Street et al        | Introducing a New Health Related Quality of Life Outcome tool for metastatic disease of the spine                                                                                                                      | Studies on the quality of all available validated instruments to measure HRQoL in a particular population | Both                 | More than two instruments | One specific property  |

| ID | Year | Author                 | Title                                                                                                                                                                                                              | Type of review                                                                                            | Instruments assessed | Number Instruments            | Measurement Properties |
|----|------|------------------------|--------------------------------------------------------------------------------------------------------------------------------------------------------------------------------------------------------------------|-----------------------------------------------------------------------------------------------------------|----------------------|-------------------------------|------------------------|
| 50 | 2010 | Zeng et al             | Quality of life measurement in women with cervical cancer: implications for Chinese cervical cancer survivors                                                                                                      | Studies on the quality of all available validated instruments to measure HRQoL in a particular population | Both                 | More than two instruments     | Multiple properties    |
| 51 | 2011 | Carlton & Kaltenthaler | Health-related quality of life measures (HRQoL) in patients with amblyopia and strabismus: a systematic review.                                                                                                    | Studies on the quality of a selection of instruments to measure HRQoL in a particular population          | Disease-specific     | More than two instruments     | Multiple properties    |
| 52 | 2011 | Carlton & Kaltenthaler | Amblyopia and quality of life: a systematic review                                                                                                                                                                 | Studies on the quality of all available validated instruments to measure HRQoL in a particular population | Both                 | More than two instruments     | Multiple properties    |
| 53 | 2011 | da Silva et al         | Quality of life assessment after Acute Coronary Syndrome: Systematic Review                                                                                                                                        | Studies on the quality of all available validated instruments to measure HRQoL in a particular population | Both                 | More than two instruments     | Multiple properties    |
| 54 | 2011 | Eckstein et al         | Measuring Quality of Life in Cleft Lip and Palate patients: currently available patient reported outcomes                                                                                                          | Studies on the quality of a selection of instruments to measure HRQoL in a particular population          | Disease-specific     | More than two instruments     | Multiple properties    |
| 55 | 2011 | Fayed et al            | Health status and QOL instruments used in childhood cancer research: deciphering conceptual content using World Health Organization definitions                                                                    | Studies on the quality of all available validated instruments to measure HRQoL in a particular population | Both                 | More than two instruments     | One specific property  |
| 56 | 2011 | Glover et al           | Understanding and assessing the impact of End-Stage renal disease on QOL. A systematic review of the content validity...                                                                                           | Studies on the quality of all available validated instruments to measure HRQoL in a particular population | Both                 | More than two instruments     | One specific property  |
| 57 | 2011 | Hounsome et al         | EQ-5D as a Quality of Life measure in people with dementia and their carers: evidence and key issues                                                                                                               | Studies on the quality of one instrument to measure HRQoL in a particular population                      | Generic              | One instrument                | Multiple properties    |
| 58 | 2011 | Janssen et al          | The use of the EQ-5D preference based health status measure in adults with type 2 diabetes mellitus                                                                                                                | Studies on the quality of one instrument to measure HRQoL in a particular population                      | Generic              | One instrument                | Multiple properties    |
| 59 | 2011 | Kowal- Bielecka        | Analysis of the validation status of WOL and Functional measures in Pulmonary Arterial Hypertension.                                                                                                               | Studies on the quality of a selection of instruments to measure HRQoL in a particular population          | Both                 | Comparison of two instruments | Multiple properties    |
| 60 | 2011 | Lien et al             | Comparison of the EORTC QLQ-C15-PAL and the FACIT-Pal for assessment of quality of life in patients with advanced cancer                                                                                           | Studies on the quality of a selection of instruments to measure HRQoL in a particular population          | Disease-specific     | Comparison of two instruments | One specific property  |
| 61 | 2011 | Luckett et al          | Choosing between the EORTC QLQ-C30 and FACT for measuring health related quality of life in cancer clinical research: issues, evidence and recommendations                                                         | Studies on the quality of a selection of instruments to measure HRQoL in a particular population          | Disease-specific     | Comparison of two instruments | Multiple properties    |
| 62 | 2011 | Mordiffi et al         | Quality of life tools for adult patients with cancer undergoing chemotherapy: a systematic review                                                                                                                  | Studies on the quality of a selection of instruments to measure HRQoL in a particular population          | Disease-specific     | More than two instruments     | Multiple properties    |
| 63 | 2011 | Noyes et al            | EQ-5D for the Assessment of Health-Related Quality of Life and Resource Allocation in Children: A Systematic Methodological Review                                                                                 | Studies on the quality of one instrument to measure HRQoL in a particular population                      | Generic              | One instrument                | Multiple properties    |
| 64 | 2011 | Papaioannou et al      | How valid and responsive are generic health status measures, such as EQ-5D and SF-36, in schizophrenia? A systematic review.                                                                                       | Studies on the quality of a selection of instruments to measure HRQoL in a particular population          | Generic              | More than two instruments     | Multiple properties    |
| 65 | 2011 | Reavey et al           | Measuring quality of life and patient satisfaction after body contouring: a systematic review of patient-reported outcome measures.                                                                                | Studies on the quality of a selection of instruments to measure HRQoL in a particular population          | Disease-specific     | More than two instruments     | Multiple properties    |
| 66 | 2011 | Schiarti et al         | Content comparison of health-related quality of life measures for cerebral palsy based on the International Classification of Functioning Quality of life in people with venous leg ulcers: an integrative review. | Studies on the quality of all available validated instruments to measure HRQoL in a particular population | Both                 | More than two instruments     | One specific property  |
| 67 | 2011 | Tayyem et al           | Analysis of Health-Related quality of life instruments measuring the impact of bariatric surgery: systematic review of instruments and their content validity                                                      | Studies on the quality of all available validated instruments to measure HRQoL in a particular population | Both                 | More than two instruments     | One specific property  |
| 68 | 2011 | Virginia et al         | Quality of life in people with venous leg ulcers: an integrative review                                                                                                                                            | Studies on the quality of all available validated instruments to measure HRQoL in a particular population | Both                 | More than two instruments     | Multiple properties    |
| 69 | 2011 | Whitehurst et al       | Systematic review and empirical comparison of contemporaneous EQ-5D and SF-6D group mean scores                                                                                                                    | Studies on the quality of a selection of instruments to measure HRQoL in general population               | Generic              | Comparison of two instruments | One specific property  |
| 70 | 2011 | Wilson et al           | Spinal cord injury and quality of life: a systematic review of outcome measures                                                                                                                                    | Studies on the quality of all available validated instruments to measure HRQoL in a particular population | Both                 | More than two instruments     | Multiple properties    |
| 71 | 2012 | Bhatt et al            | Health outcome measures for diabetes mellitus: a review                                                                                                                                                            | Studies on the quality of a selection of instruments to measure HRQoL in a particular population          | Disease-specific     | More than two instruments     | Multiple properties    |
| 72 | 2012 | Chopra & Kamal         | A systematic review of quality of life instruments in long-term breast cancer survivors.                                                                                                                           | Studies on the quality of a selection of instruments to measure HRQoL in a particular population          | Disease-specific     | More than two instruments     | Multiple properties    |
| 73 | 2012 | Cormier et al          | Health related quality of life in patients with melanoma. Overview of instruments and outcomes                                                                                                                     | Studies on the quality of all available validated instruments to measure HRQoL in a particular population | Both                 | More than two instruments     | Multiple properties    |
| 74 | 2012 | Correia & De Carlo     | Evaluation of quality of life in a palliative care context: an integrative literature review.                                                                                                                      | Studies on the quality of all available validated instruments to measure HRQoL in a particular population | Both                 | More than two instruments     | Multiple properties    |

| ID | Year | Author               | Title                                                                                                                                                              | Type of review                                                                                            | Instruments assessed | Number Instruments            | Measurement Properties |
|----|------|----------------------|--------------------------------------------------------------------------------------------------------------------------------------------------------------------|-----------------------------------------------------------------------------------------------------------|----------------------|-------------------------------|------------------------|
| 75 | 2012 | Gräske et al         | Dementia-Specific Quality of Life Instruments and Their Appropriateness in Shared-Housing Arrangements--A Literature Study.                                        | Studies on the quality of a selection of instruments to measure HRQoL in a particular population          | Disease-specific     | More than two instruments     | Multiple properties    |
| 76 | 2012 | Ho et al             | Measuring Quality of life and patient satisfaction in facial paralysis patients: a systematic review of patient reported outcome measures                          | Studies on the quality of a selection of instruments to measure HRQoL in a particular population          | Disease-specific     | More than two instruments     | Multiple properties    |
| 77 | 2012 | Hogg et al           | Measures of health related quality of life in diabetes-related foot disease: a systematic review                                                                   | Studies on the quality of all available validated instruments to measure HRQoL in a particular population | Both                 | More than two instruments     | Multiple properties    |
| 78 | 2012 | Luquiens et al       | Quality of life among alcohol-dependent patients: how satisfactory are the available instruments? A systematic review                                              | Studies on the quality of all available validated instruments to measure HRQoL in a particular population | Both                 | More than two instruments     | Multiple properties    |
| 79 | 2012 | Madureira et al      | Quality of life measurements in patients with osteoporosis and fractures                                                                                           | Studies on the quality of all available validated instruments to measure HRQoL in a particular population | Both                 | More than two instruments     | Multiple properties    |
| 80 | 2012 | Milne et al          | Measuring Health-Related Quality of Life for Patients with Diabetic Retinopathy                                                                                    | Studies on the quality of all available validated instruments to measure HRQoL in a particular population | Both                 | More than two instruments     | Multiple properties    |
| 81 | 2012 | Ojo et al            | A Systematic Review of Head and Neck Cancer Quality of Life Assessment Instruments                                                                                 | Studies on the quality of a selection of instruments to measure HRQoL in a particular population          | Disease-specific     | More than two instruments     | Multiple properties    |
| 82 | 2012 | Popovic et al        | Comparison of the EORTC QLQ-BM22 and the FACT-BP for assessment of quality of life in cancer patients with bone metastases                                         | Studies on the quality of a selection of instruments to measure HRQoL in a particular population          | Disease-specific     | Comparison of two instruments | Multiple properties    |
| 83 | 2012 | Quintanilla et al    | Comparison of disease-specific quality of life instruments in the assessment of chronic rhinosinusitis                                                             | Studies on the quality of a selection of instruments to measure HRQoL in a particular population          | Disease-specific     | More than two instruments     | Multiple properties    |
| 84 | 2012 | Rajmil et al         | Health-related quality of life measurement in children and adolescents in Ibero-American countries, 2000 to 2010.                                                  | Studies on the quality of a selection of instruments to measure HRQoL in a particular population          | Both                 | More than two instruments     | Multiple properties    |
| 85 | 2012 | Shin & Shin          | Measurement of quality of life in menopausal women: a systematic review.                                                                                           | Studies on the quality of a selection of instruments to measure HRQoL in a particular population          | Disease-specific     | More than two instruments     | Multiple properties    |
| 86 | 2012 | Smith et al          | Measuring health-related quality of life in diabetic peripheral neuropathy: a systematic review.                                                                   | Studies on the quality of a selection of instruments to measure HRQoL in a particular population          | Disease-specific     | More than two instruments     | Multiple properties    |
| 87 | 2012 | Tosh et al           | A review of generic preference-based measures of health-related quality of life in visual disorders.                                                               | Studies on the quality of all available validated instruments to measure HRQoL in a particular population | Generic              | More than two instruments     | Multiple properties    |
| 88 | 2012 | Townsend-White et al | Review: a systematic review of quality of life measures for people with intellectual disabilities and challenging behaviours                                       | Studies on the quality of all available validated instruments to measure HRQoL in a particular population | Generic              | More than two instruments     | Multiple properties    |
| 89 | 2012 | Walker et al         | Are they worth it? A systematic review of QOL instruments for use with mentally disordered offenders                                                               | Studies on the quality of all available validated instruments to measure HRQoL in a particular population | Both                 | More than two instruments     | Multiple properties    |
| 90 | 2012 | Whitehurst et al     | A review of preference-based health-related quality of life questionnaires in spinal cord injury research.                                                         | Studies on the quality of all available validated instruments to measure HRQoL in a particular population | Generic              | More than two instruments     | Multiple properties    |
| 91 | 2012 | Yip et al            | Reliability, validity and feasibility of quality of life instruments for adult patients with cancer undergoing chemotherapy: Result from a systematic review.      | Studies on the quality of a selection of instruments to measure HRQoL in a particular population          | Disease-specific     | More than two instruments     | Multiple properties    |
| 92 | 2013 | Al Sayah et al       | Health related quality of life measures in Arabic speaking populations: A systematic review on cross-cultural adaptation and measurement properties                | Studies on the quality of all available validated instruments to measure HRQoL in a particular population | Generic              | More than two instruments     | Multiple properties    |
| 93 | 2013 | Basra et al          | Infants' Dermatitis Quality of Life Index: a decade of experience of validation and clinical application.                                                          | Studies on the quality of one instrument to measure HRQoL in a particular population                      | Disease-specific     | One instrument                | Multiple properties    |
| 94 | 2013 | Castelino et al      | Comparison of the psychometric properties of health-related quality of life measures used in adults with systemic lupus erythematosus: a review of the literature. | Studies on the quality of all available validated instruments to measure HRQoL in a particular population | Both                 | More than two instruments     | Multiple properties    |
| 95 | 2013 | Chandratne et al     | Health-related quality of life in gout: a systematic review.                                                                                                       | Studies on the quality of all available validated instruments to measure HRQoL in a particular population | Both                 | More than two instruments     | Multiple properties    |
| 96 | 2013 | Chow et al           | Condition-specific quality of life questionnaires for caregivers of children with pediatric conditions: A systematic review.                                       | Studies on the quality of a selection of instruments to measure HRQoL in a particular population          | Disease-specific     | More than two instruments     | Multiple properties    |
| 97 | 2013 | Davis et al          | A review of the psychometric performance of the EQ-5D in people with urinary incontinence.                                                                         | Studies on the quality of one instrument to measure HRQoL in a particular population                      | Generic              | One instrument                | Multiple properties    |
| 98 | 2013 | de Almeida et al     | Quality of life instruments for skull base pathology: Systematic review and methodologic appraisal                                                                 | Studies on the quality of a selection of instruments to measure HRQoL in a particular population          | Disease-specific     | More than two instruments     | Multiple properties    |
| 99 | 2013 | Djan et al           | A systematic review of questionnaires to measure the impact of appearance on quality of life for head and neck cancer patients.                                    | Studies on the quality of a selection of instruments to measure HRQoL in a particular population          | Both                 | More than two instruments     | Multiple properties    |

| ID  | Year | Author           | Title                                                                                                                                                                                                                        | Type of review                                                                                            | Instruments assessed | Number Instruments        | Measurement Properties |
|-----|------|------------------|------------------------------------------------------------------------------------------------------------------------------------------------------------------------------------------------------------------------------|-----------------------------------------------------------------------------------------------------------|----------------------|---------------------------|------------------------|
| 100 | 2013 | Gakhar et al     | Health-related quality of life assessment after antiretroviral therapy: A review of the literature                                                                                                                           | Studies on the quality of all available validated instruments to measure HRQoL in a particular population | Both                 | More than two instruments | Multiple properties    |
| 101 | 2013 | Hitzig et al     | Identifying and classifying quality-of-life tools for assessing pressure ulcers after spinal cord injury.                                                                                                                    | Studies on the quality of all available validated instruments to measure HRQoL in a particular population | Both                 | More than two instruments | Multiple properties    |
| 102 | 2013 | Jabir et al      | Assessing Improvement in Quality of Life and Patient Satisfaction following Body Contouring Surgery in Patients with Massive Weight Loss: A Critical Review of Outcome Measures Employed.                                    | Studies on the quality of all available validated instruments to measure HRQoL in a particular population | Both                 | More than two instruments | Multiple properties    |
| 103 | 2013 | Lee et al        | A systematic review of patient-reported outcome instruments of nonmelanoma skin cancer in the dermatologic population                                                                                                        | Studies on the quality of a selection of instruments to measure HRQoL in a particular population          | Both                 | More than two instruments | Multiple properties    |
| 104 | 2013 | Levterova et al  | Instruments for disease-specific quality-of-life measurement in patients with type 2 diabetes mellitus—a systematic review.                                                                                                  | Studies on the quality of a selection of instruments to measure HRQoL in a particular population          | Disease-specific     | More than two instruments | Multiple properties    |
| 105 | 2013 | Li et al         | Psychometric properties of self-reported quality of life measures for people with intellectual disabilities: A systematic review.                                                                                            | Studies on the quality of all available validated instruments to measure HRQoL in a particular population | Both                 | More than two instruments | Multiple properties    |
| 106 | 2013 | Lin et al        | Evaluation of content on EQ-5D as compared to disease-specific utility measures.                                                                                                                                             | Studies on the quality of a selection of instruments to measure HRQoL in a particular population          | Both                 | More than two instruments | One specific property  |
| 107 | 2013 | Mitera et al     | Quality of life measures used in radiation therapy trials for patients with metastatic spinal cord compression (MSCC)                                                                                                        | Studies on the quality of all available validated instruments to measure HRQoL in a particular population | Both                 | More than two instruments | Multiple properties    |
| 108 | 2013 | Mogos et al      | A Systematic Review of Quality of Life Measures in Pregnant and Postpartum Mothers.                                                                                                                                          | Studies on the quality of all available validated instruments to measure HRQoL in a particular population | Both                 | More than two instruments | Multiple properties    |
| 109 | 2013 | Mousavi et al    | Assessment of Questionnaires Measuring Quality of Life in Infertile Couples: A Systematic Review.                                                                                                                            | Studies on the quality of all available validated instruments to measure HRQoL in a particular population | Both                 | More than two instruments | One specific property  |
| 110 | 2013 | Moyle et al      | Health-related quality of life in older people with severe dementia: challenges for measurement and management                                                                                                               | Studies on the quality of all available validated instruments to measure HRQoL in a particular population | Both                 | More than two instruments | Multiple properties    |
| 111 | 2013 | Muzzatti et al   | Assessing quality of life in long-term cancer survivors: a review of available tools.                                                                                                                                        | Studies on the quality of all available validated instruments to measure HRQoL in a particular population | Both                 | More than two instruments | Multiple properties    |
| 112 | 2013 | Paltzer et al    | Measuring the health-related quality of life (HRQoL) of young children in resource-limited settings: a review of existing measures.                                                                                          | Studies on the quality of all available validated instruments to measure HRQoL in a particular population | Both                 | More than two instruments | One specific property  |
| 113 | 2013 | Perales et al    | Health-related quality-of-life instruments for Alzheimer's disease and mixed dementia.                                                                                                                                       | Studies on the quality of a selection of instruments to measure HRQoL in a particular population          | Disease-specific     | More than two instruments | Multiple properties    |
| 114 | 2013 | Pusic et al      | Quality of life among breast cancer patients with lymphedema: A systematic review of patient-reported outcome instruments and outcomes.                                                                                      | Studies on the quality of all available validated instruments to measure HRQoL in a particular population | Both                 | More than two instruments | Multiple properties    |
| 115 | 2013 | Roncada et al    | Specific instruments to assess quality of life in children and adolescents with asthma.                                                                                                                                      | Studies on the quality of all available validated instruments to measure HRQoL in a particular population | Disease-specific     | More than two instruments | Multiple properties    |
| 116 | 2013 | Salek et al      | Clinical experience and psychometric properties of the Children's Dermatology Life Quality Index (CDLQI), 1995-2012                                                                                                          | Studies on the quality of one instrument to measure HRQoL in a particular population                      | Disease-specific     | One instrument            | Multiple properties    |
| 117 | 2013 | Testart et al    | Quality of life and other outcome measures in caregivers of patients with schizophrenia                                                                                                                                      | Studies on the quality of all available validated instruments to measure HRQoL in a particular population | Both                 | More than two instruments | Multiple properties    |
| 118 | 2013 | Weldam et al     | Evaluation of Quality of Life instruments for use in COPD care and research: A systematic review.                                                                                                                            | Studies on the quality of all available validated instruments to measure HRQoL in a particular population | Both                 | More than two instruments | Multiple properties    |
| 119 | 2013 | Wheelright et al | A systematic review of health-related quality of life instruments in patients with cancer cachexia                                                                                                                           | Studies on the quality of all available validated instruments to measure HRQoL in a particular population | Both                 | More than two instruments | Multiple properties    |
| 120 | 2013 | Yang et al       | An assessment of validity and responsiveness of generic measures of health-related quality of life in hearing impairment.                                                                                                    | Studies on the quality of all available validated instruments to measure HRQoL in a particular population | Generic              | More than two instruments | Multiple properties    |
| 121 | 2014 | Anthony et al    | Considering quality of life for children with cancer: a systematic review of patient-reported outcome measures and the development of a conceptual model                                                                     | Studies on the quality of all available validated instruments to measure HRQoL in a particular population | Both                 | More than two instruments | One specific property  |
| 122 | 2014 | Aspden et al     | Quality-of-life measures for use within care homes: a systematic review of their measurement properties.                                                                                                                     | Studies on the quality of all available validated instruments to measure HRQoL in a particular population | Both                 | More than two instruments | Multiple properties    |
| 123 | 2014 | Balioussis et al | Identifying and classifying quality of life tools for assessing spasticity after spinal cord injury.                                                                                                                         | Studies on the quality of all available validated instruments to measure HRQoL in a particular population | Both                 | More than two instruments | Multiple properties    |
| 124 | 2014 | Brazier et al    | A systematic review, psychometric analysis and qualitative assessment of generic preference-based measures of health in mental health populations and the estimation of mapping functions from widely used specific measures | Studies on the quality of a selection of instruments to measure HRQoL in a particular population          | Generic              | More than two instruments | Multiple properties    |

| ID  | Year | Author             | Title                                                                                                                                                            | Type of review                                                                                            | Instruments assessed | Number Instruments            | Measurement Properties |
|-----|------|--------------------|------------------------------------------------------------------------------------------------------------------------------------------------------------------|-----------------------------------------------------------------------------------------------------------|----------------------|-------------------------------|------------------------|
| 125 | 2014 | Chiu et al         | Comparison of three shortened questionnaires for assessment of quality of life in advanced cancer.                                                               | Studies on the quality of a selection of instruments to measure HRQoL in a particular population          | Disease-specific     | More than two instruments     | Multiple properties    |
| 126 | 2014 | Chow et al         | Comparison of the EORTC QLQ-BN20 and the FACT-Br quality of life questionnaires for patients with primary brain cancers: a literature review.                    | Studies on the quality of a selection of instruments to measure HRQoL in a particular population          | Disease-specific     | Comparison of two instruments | Multiple properties    |
| 127 | 2014 | Garin et al        | Assessing health-related quality of life in patients with heart failure: a systematic, standardized comparison of available measures.                            | Studies on the quality of a selection of instruments to measure HRQoL in a particular population          | Disease-specific     | More than two instruments     | Multiple properties    |
| 128 | 2014 | Gilchrist et al    | Assessment of the quality of measures of child oral health-related quality of life.                                                                              | Studies on the quality of a selection of instruments to measure HRQoL in a particular population          | Generic              | More than two instruments     | Multiple properties    |
| 129 | 2014 | Grubbs et al       | A review of quality of life measures in dry eye questionnaires.                                                                                                  | Studies on the quality of all available validated instruments to measure HRQoL in a particular population | Both                 | More than two instruments     | Multiple properties    |
| 130 | 2014 | Gupta et al        | The COPD assessment test: a systematic review.                                                                                                                   | Studies on the quality of one instrument to measure HRQoL in a particular population                      | Disease-specific     | One instrument                | Multiple properties    |
| 131 | 2014 | Hawkins et al      | A Systematic Review of Functional and Quality of Life Assessment after Major Lower Extremity Amputation                                                          | Studies on the quality of all available validated instruments to measure HRQoL in a particular population | Both                 | More than two instruments     | Multiple properties    |
| 132 | 2014 | Hewison et al      | An evaluative review of questionnaires recommended for the assessment of quality of life and symptom severity in women with urinary incontinence.                | Studies on the quality of all available validated instruments to measure HRQoL in a particular population | Both                 | More than two instruments     | Multiple properties    |
| 133 | 2014 | Ikeda et al        | Assessment of quality of life in children and youth with autism spectrum disorder: a critical review.                                                            | Studies on the quality of all available validated instruments to measure HRQoL in a particular population | Both                 | More than two instruments     | Multiple properties    |
| 134 | 2014 | Jardine et al      | Self-reported quality of life of young children with conditions from early infancy: a systematic review.                                                         | Studies on the quality of all available validated instruments to measure HRQoL in a particular population | Both                 | More than two instruments     | One specific property  |
| 135 | 2014 | Kuspinar et al     | A review of the psychometric properties of generic utility measures in multiple sclerosis.                                                                       | Studies on the quality of all available validated instruments to measure HRQoL in a particular population | Generic              | More than two instruments     | Multiple properties    |
| 136 | 2014 | Lee et al          | Measurement properties of rheumatoid arthritis-specific quality-of-life questionnaires: Systematic review of the literature.                                     | Studies on the quality of a selection of instruments to measure HRQoL in a particular population          | Disease-specific     | More than two instruments     | Multiple properties    |
| 137 | 2014 | Lieu et al         | Pediatric quality of life in children with otolaryngologic disease: what inventories are available and what is still needed?                                     | Studies on the quality of all available validated instruments to measure HRQoL in a particular population | Both                 | More than two instruments     | Multiple properties    |
| 138 | 2014 | Longworth et al    | Use of generic and condition-specific measures of health-related quality of life in NICE decision-making: a systematic review, statistical modelling and survey. | Studies on the quality of all available validated instruments to measure HRQoL in a particular population | Both                 | More than two instruments     | Multiple properties    |
| 139 | 2014 | Makai et al        | Quality of life instruments for economic evaluations in health and social care for older people: A systematic review.                                            | Studies on the quality of a selection of instruments to measure HRQoL in a particular population          | Generic              | More than two instruments     | Multiple properties    |
| 140 | 2014 | Niu et al          | Health-related quality of life in women with breast cancer: a literature-based review of psychometric properties of breast cancer-specific measures.             | Studies on the quality of a selection of instruments to measure HRQoL in a particular population          | Disease-specific     | More than two instruments     | Multiple properties    |
| 141 | 2014 | Salvilla et al     | Disease-specific health-related quality of life instruments for IgE-mediated food allergy                                                                        | Studies on the quality of a selection of instruments to measure HRQoL in a particular population          | Disease-specific     | More than two instruments     | Multiple properties    |
| 142 | 2014 | Schmidt et al      | Assessing quality of life in patients with prostate cancer: a systematic and standardized comparison of available instruments.                                   | Studies on the quality of a selection of instruments to measure HRQoL in a particular population          | Disease-specific     | More than two instruments     | Multiple properties    |
| 143 | 2014 | Smith et al        | Most domains of the European Organisation for Research and Treatment of Cancer Quality of Life Questionnaire C30 are reliable.                                   | Studies on the quality of one instrument to measure HRQoL in a particular population                      | Disease-specific     | One instrument                | One specific property  |
| 144 | 2014 | Souza et al        | Tools used for evaluation of Brazilian children's quality of life                                                                                                | Studies on the quality of all available validated instruments to measure HRQoL in a particular population | Generic              | More than two instruments     | Multiple properties    |
| 145 | 2014 | Swigris et al      | The psychometric properties of the St George's Respiratory Questionnaire (SGRQ) in patients with idiopathic pulmonary fibrosis: a literature review.             | Studies on the quality of one instrument to measure HRQoL in a particular population                      | Disease-specific     | One instrument                | Multiple properties    |
| 146 | 2014 | Timmerman et al    | Psychometric characteristics of health-related quality-of-life questionnaires in oropharyngeal dysphagia.                                                        | Studies on the quality of a selection of instruments to measure HRQoL in a particular population          | Disease-specific     | More than two instruments     | Multiple properties    |
| 147 | 2014 | Treanor & Donnelly | A methodological review of the Short Form Health Survey 36 (SF-36) and its derivatives among breast cancer survivors                                             | Studies on the quality of a selection of instruments to measure HRQoL in a particular population          | Generic              | More than two instruments     | Multiple properties    |
| 148 | 2014 | Watt et al         | Assessing health-related quality of life in patients with benign non-toxic goitre                                                                                | Studies on the quality of all available validated instruments to measure HRQoL in a particular population | Both                 | More than two instruments     | Multiple properties    |
| 149 | 2014 | Wolpe et al        | Assessing the impact of urinary incontinence on quality of life: systematic review of instruments in Portuguese.                                                 | Studies on the quality of a selection of instruments to measure HRQoL in a particular population          | Disease-specific     | More than two instruments     | Multiple properties    |



| ID  | Year | Author                 | Title                                                                                                                                                                                     | Type of review                                                                                            | Instruments assessed | Number Instruments        | Measurement Properties |
|-----|------|------------------------|-------------------------------------------------------------------------------------------------------------------------------------------------------------------------------------------|-----------------------------------------------------------------------------------------------------------|----------------------|---------------------------|------------------------|
| 150 | 2015 | Alrubaiy et al         | Systematic review of health-related quality of life measures for inflammatory bowel disease                                                                                               | Studies on the quality of a selection of instruments to measure HRQoL in a particular population          | Disease-specific     | More than two instruments | Multiple properties    |
| 151 | 2015 | Aspesberro et al       | Health-related quality of life following pediatric critical illness.                                                                                                                      | Studies on the quality of all available validated instruments to measure HRQoL in a particular population | Both                 | More than two instruments | Multiple properties    |
| 152 | 2015 | Bédard et al           | Systematic review of vision-related quality of life questionnaires for older institutionalised seniors with dementia                                                                      | Studies on the quality of one instrument to measure HRQoL in a particular population                      | Disease-specific     | One instrument            | Multiple properties    |
| 153 | 2015 | Bowling et al          | Quality of life in dementia: a systematically conducted narrative review of dementia-specific measurement scales.                                                                         | Studies on the quality of a selection of instruments to measure HRQoL in a particular population          | Disease-specific     | More than two instruments | Multiple properties    |
| 154 | 2015 | Conijn et al           | Assessing the quality of available patient reported outcome measures for intermittent claudication: a systematic review using the COSMIN checklist.                                       | Studies on the quality of a selection of instruments to measure HRQoL in a particular population          | Disease-specific     | More than two instruments | Multiple properties    |
| 155 | 2015 | de Climens et al       | Review of patient-reported outcome instruments measuring health-related quality of life and satisfaction in patients with type 2 diabetes treated with oral therapy.                      | Studies on the quality of all available validated instruments to measure HRQoL in a particular population | Both                 | More than two instruments | Multiple properties    |
| 156 | 2015 | Dronavalli & Thompson  | A systematic review of measurement tools of health and well-being for evaluating community-based interventions.                                                                           | Studies on the quality of all available validated instruments to measure HRQoL in a particular population | Both                 | More than two instruments | Multiple properties    |
| 157 | 2015 | Hamoen et al           | Measuring health-related quality of life in men with prostate cancer: A systematic review of the most used questionnaires and their validity.                                             | Studies on the quality of all available validated instruments to measure HRQoL in a particular population | Both                 | More than two instruments | Multiple properties    |
| 158 | 2015 | Hu et al               | How Quality of Life as Patient-Reported Outcome Has Been Studied for Rheumatoid Arthritis in Chinese-Speaking Population                                                                  | Studies on the quality of all available validated instruments to measure HRQoL in a particular population | Both                 | More than two instruments | Multiple properties    |
| 159 | 2015 | Janssens et al         | Measurement properties of multidimensional patient-reported outcome measures in neurodisability: a systematic review of evaluation studies.                                               | Studies on the quality of all available validated instruments to measure HRQoL in a particular population | Generic              | More than two instruments | Multiple properties    |
| 160 | 2015 | Launois et al          | Health-related quality-of-life scales specific for chronic venous disorders of the lower limbs.                                                                                           | Studies on the quality of a selection of instruments to measure HRQoL in a particular population          | Disease-specific     | More than two instruments | Multiple properties    |
| 161 | 2015 | Monticone et al        | Measurement properties of translated versions of the Scoliosis Research Society-22 Patient Questionnaire, SRS-22: A systematic review.                                                    | Studies on the quality of one instrument to measure HRQoL in a particular population                      | Disease-specific     | One instrument            | Multiple properties    |
| 162 | 2015 | Nguyen et al           | EORTC QLQ-BR23 and FACT-B for the assessment of quality of life in patients with breast cancer: a literature review.                                                                      | Studies on the quality of a selection of instruments to measure HRQoL in a particular population          | Disease-specific     | More than two instruments | Multiple properties    |
| 163 | 2015 | Oliveira et al         | Evaluation of cross-cultural adaptation and measurement properties of breast cancer-specific quality-of-life questionnaires: A systematic review.                                         | Studies on the quality of a selection of instruments to measure HRQoL in a particular population          | Disease-specific     | More than two instruments | Multiple properties    |
| 164 | 2015 | Polinder et al         | Health-related quality of life after TBI: a systematic review of study design, instruments, measurement properties, and outcome.                                                          | Studies on the quality of all available validated instruments to measure HRQoL in a particular population | Both                 | More than two instruments | Multiple properties    |
| 165 | 2015 | Taghavi et al          | Health-related quality of life in polycystic ovary syndrome patients: A systematic review.fit                                                                                             | Studies on the quality of one instrument to measure HRQoL in a particular population                      | Disease-specific     | One instrument            | Multiple properties    |
| 166 | 2015 | Wong et al             | Systematic review recommends the European Organization for Research and Treatment of Cancer colorectal cancer-specific module for measuring quality of life in colorectal cancer patients | Studies on the quality of all available validated instruments to measure HRQoL in a particular population | Both                 | More than two instruments | Multiple properties    |
| 167 | 2016 | Algar et al            | Measuring the quality of life and well-being of people with dementia: A review of observational measures.                                                                                 | Studies on the quality of all available validated instruments to measure HRQoL in a particular population | Both                 | More than two instruments | Multiple properties    |
| 168 | 2016 | Bryant et al           | A Systematic Review of Psychometric Properties of Health-Related Quality-of-Life and Symptom Instruments in Adult Acute Leukemia Survivors.                                               | Studies on the quality of all available validated instruments to measure HRQoL in a particular population | Both                 | More than two instruments | Multiple properties    |
| 169 | 2016 | Coombes et al          | Health-related quality-of-life outcome measures in paediatric palliative care: A systematic review of psychometric properties and feasibility of use.                                     | Studies on the quality of all available validated instruments to measure HRQoL in a particular population | Both                 | More than two instruments | Multiple properties    |
| 170 | 2016 | Dichter et al          | Linguistic validation and reliability properties are weak investigated of most dementia-specific quality of life measurements-a systematic review                                         | Studies on the quality of a selection of instruments to measure HRQoL in a particular population          | Disease-specific     | More than two instruments | Multiple properties    |
| 171 | 2016 | Ganesh et al           | Comparison of the FACT-C, EORTC QLQ-CR38, and QLQ-CR29 quality of life questionnaires for patients with colorectal cancer: a literature review.                                           | Studies on the quality of a selection of instruments to measure HRQoL in a particular population          | Generic              | More than two instruments | Multiple properties    |
| 172 | 2016 | Gutiérrez-Vargas et al | Instruments to measure the quality of life in patients with oral mucositis undergoing oncological treatment: a systematic review of the literature.                                       | Studies on the quality of all available validated instruments to measure HRQoL in a particular population | Generic              | More than two instruments | Multiple properties    |
| 173 | 2016 | Hand et al             | Measuring health-related quality of life in adults with chronic conditions in primary care settings: Critical review of concepts and 3 tools                                              | Studies on the quality of all available validated instruments to measure HRQoL in a particular population | Generic              | More than two instruments | Multiple properties    |
| 174 | 2016 | Heinl et al            | Measurement properties of adult quality of life measurement instruments for eczema: a systematic review                                                                                   | Studies on the quality of a selection of instruments to measure HRQoL in a particular population          | Disease-specific     | More than two instruments | Multiple properties    |

| ID  | Year | Author          | Title                                                                                                                                                                                                                                                                                                                     | Type of review                                                                                            | Instruments assessed | Number Instruments            | Measurement Properties |
|-----|------|-----------------|---------------------------------------------------------------------------------------------------------------------------------------------------------------------------------------------------------------------------------------------------------------------------------------------------------------------------|-----------------------------------------------------------------------------------------------------------|----------------------|-------------------------------|------------------------|
| 175 | 2016 | Kotecha et al   | Patient-Reported Outcomes for Quality of Life Assessment in Atrial Fibrillation: A Systematic Review of Measurement Properties.                                                                                                                                                                                           | Studies on the quality of a selection of instruments to measure HRQoL in a particular population          | Disease-specific     | More than two instruments     | Multiple properties    |
| 176 | 2016 | Lee et al       | A systematic review of measurement properties of the instruments measuring health-related quality of life in patients with irritable bowel syndrome.                                                                                                                                                                      | Studies on the quality of a selection of instruments to measure HRQoL in a particular population          | Disease-specific     | More than two instruments     | Multiple properties    |
| 177 | 2016 | Maratia et al   | Assessing health-related quality of life in patients with breast cancer: a systematic and standardized comparison of available instruments using the EMPRO tool.                                                                                                                                                          | Studies on the quality of all available validated instruments to measure HRQoL in a particular population | Both                 | More than two instruments     | Multiple properties    |
| 178 | 2016 | Mestre et al    | Rating scales for behavioral symptoms in Huntington's disease: Critique and recommendations.                                                                                                                                                                                                                              | Studies on the quality of all available validated instruments to measure HRQoL in a particular population | Both                 | More than two instruments     | Multiple properties    |
| 179 | 2016 | Spinou et al    | The validity of health-related quality of life questionnaires in bronchiectasis: a systematic review and meta-analysis                                                                                                                                                                                                    | Studies on the quality of all available validated instruments to measure HRQoL in a particular population | Both                 | More than two instruments     | Multiple properties    |
| 180 | 2016 | Tapia et al     | Health-Related Quality-of-Life Instruments for Pediatric Patients with Diverse Facial Deformities: A Systematic Literature Review                                                                                                                                                                                         | Studies on the quality of a selection of instruments to measure HRQoL in a particular population          | Both                 | More than two instruments     | Multiple properties    |
| 181 | 2016 | Wong et al      | A systematic review of quality of thyroid-specific health related quality of life instruments recommends ThyPRO for patients with benign thyroid diseases                                                                                                                                                                 | Studies on the quality of a selection of instruments to measure HRQoL in a particular population          | Disease-specific     | More than two instruments     | Multiple properties    |
| 182 | 2016 | Woo et al       | Comparison of the EORTC STO-22 and the FACT-Ga quality of life questionnaires for patients with gastric cancer.                                                                                                                                                                                                           | Studies on the quality of a selection of instruments to measure HRQoL in a particular population          | Generic              | Comparison of two instruments | Multiple properties    |
| 183 | 2017 | Ahmadi et al    | Acceptability, reliability, and validity of the Stroke and Aphasia Quality of Life Scale-39 (SAQOL-39) across languages: A systematic review.                                                                                                                                                                             | Studies on the quality of a selection of instruments to measure HRQoL in a particular population          | Disease-specific     | More than two instruments     | Multiple properties    |
| 184 | 2017 | Baghdadli et al | Measurement properties of screening and diagnostic tools for autism spectrum adults of mean normal intelligence: A systematic review.                                                                                                                                                                                     | Studies on the quality of a selection of instruments to measure HRQoL in a particular population          | Disease-specific     | More than two instruments     | Multiple properties    |
| 185 | 2017 | Best et al      | Identifying and classifying quality of life tools for neurogenic bladder function after spinal cord injury: A systematic review.                                                                                                                                                                                          | Studies on the quality of all available validated instruments to measure HRQoL in a particular population | Both                 | More than two instruments     | Multiple properties    |
| 186 | 2017 | Chen et al      | Inflammatory bowel disease-specific health-related quality of life instruments: a systematic review of measurement properties.                                                                                                                                                                                            | Studies on the quality of a selection of instruments to measure HRQoL in a particular population          | Disease-specific     | More than two instruments     | Multiple properties    |
| 187 | 2017 | Frew et al      | Disease-specific health related quality of life patient reported outcome measures in Genodermatoses: a systematic review and critical evaluation.                                                                                                                                                                         | Studies on the quality of a selection of instruments to measure HRQoL in a particular population          | Disease-specific     | More than two instruments     | Multiple properties    |
| 188 | 2017 | Heaney et al    | A review of the psychometric properties and use of the Rheumatoid Arthritis Quality of Life Questionnaire (RaQoL) in clinical research                                                                                                                                                                                    | Studies on the quality of one instrument to measure HRQoL in a particular population                      | Disease-specific     | One instrument                | Multiple properties    |
| 189 | 2017 | Heinl et al     | Measurement properties of quality-of-life measurement instruments for infants, children and adolescents with eczema: a systematic review.                                                                                                                                                                                 | Studies on the quality of a selection of instruments to measure HRQoL in a particular population          | Both                 | More than two instruments     | Multiple properties    |
| 190 | 2017 | Kandel et al    | Patient-reported Outcomes for Assessment of Quality of Life in Refractive Error: A Systematic Review.                                                                                                                                                                                                                     | Studies on the quality of all available validated instruments to measure HRQoL in a particular population | Both                 | More than two instruments     | Multiple properties    |
| 191 | 2017 | Kao et al       | Scoping Review of Pediatric Tonsillectomy Quality of Life Assessment Instruments                                                                                                                                                                                                                                          | Studies on the quality of all available validated instruments to measure HRQoL in a particular population | Both                 | More than two instruments     | Multiple properties    |
| 192 | 2017 | Khan et al      | Health Status and Quality of Life in Tuberculosis: Systematic Review of Study Design, Instruments, Measuring Properties and Outcomes.                                                                                                                                                                                     | Studies on the quality of a selection of instruments to measure HRQoL in a particular population          | Disease-specific     | More than two instruments     | Multiple properties    |
| 193 | 2017 | Kwan et al      | A systematic review of quality-of-life domains and items relevant to patients with spondyloarthritis                                                                                                                                                                                                                      | Studies on the quality of a selection of instruments to measure HRQoL in a particular population          | Disease-specific     | More than two instruments     | One specific property  |
| 194 | 2017 | Limpberg et al  | Health-related quality of life questionnaires in individuals with haemophilia: a systematic review of their measurement properties                                                                                                                                                                                        | Studies on the quality of all available validated instruments to measure HRQoL in a particular population | Both                 | More than two instruments     | Multiple properties    |
| 195 | 2017 | Lucendo et al   | Systematic review: health-related quality of life in children and adults with eosinophilic oesophagitis-instruments for measurement and determinant factors. Systematic review: health-related quality of life in children and adults with eosinophilic oesophagitis-instruments for measurement and determinant factors. | Studies on the quality of all available validated instruments to measure HRQoL in a particular population | Both                 | More than two instruments     | Multiple properties    |
| 196 | 2017 | Page et al      | Instruments measuring the disease-specific quality of life of family carers of people with neurodegenerative diseases: a systematic review.                                                                                                                                                                               | Studies on the quality of a selection of instruments to measure HRQoL in a particular population          | Disease-specific     | More than two instruments     | Multiple properties    |
| 197 | 2017 | Poku et al      | Systematic review assessing the measurement properties of patient-reported outcomes for venous leg ulcers.                                                                                                                                                                                                                | Studies on the quality of all available validated instruments to measure HRQoL in a particular population | Both                 | More than two instruments     | Multiple properties    |
| 198 | 2017 | Roydhouse et al | Systematic review of caregiver responses for patient health-related quality of life in adult cancer care.                                                                                                                                                                                                                 | Studies on the quality of all available validated instruments to measure HRQoL in a particular population | Both                 | More than two instruments     | One specific property  |



| ID  | Year | Author               | Title                                                                                                                                                                                                                              | Type of review                                                                                            | Instruments assessed | Number Instruments            | Measurement Properties |
|-----|------|----------------------|------------------------------------------------------------------------------------------------------------------------------------------------------------------------------------------------------------------------------------|-----------------------------------------------------------------------------------------------------------|----------------------|-------------------------------|------------------------|
| 199 | 2017 | Strada et al         | Measuring quality of life in opioid-dependent people: a systematic review of assessment instruments.                                                                                                                               | Studies on the quality of all available validated instruments to measure HRQoL in a particular population | Both                 | More than two instruments     | Multiple properties    |
| 200 | 2017 | Sullivan et al       | Assessing quality of life of patients with hypospadias: A systematic review of validated patient-reported outcome instruments.                                                                                                     | Studies on the quality of all available validated instruments to measure HRQoL in a particular population | Both                 | More than two instruments     | Multiple properties    |
| 201 | 2017 | Tang et al           | Assessing quality of life in diabetes: II - Deconstructing measures into a simple framework.                                                                                                                                       | Studies on the quality of a selection of instruments to measure HRQoL in a particular population          | Disease-specific     | More than two instruments     | Multiple properties    |
| 202 | 2017 | Tax et al            | Measuring health-related quality of life in cervical cancer patients: a systematic review of the most used questionnaires and their validity.                                                                                      | Studies on the quality of a selection of instruments to measure HRQoL in a particular population          | Disease-specific     | Comparison of two instruments | Multiple properties    |
| 203 | 2017 | Xin & McIntosh       | Assessment of the construct validity and responsiveness of preference-based quality of life measures in people with Parkinson's: a systematic review                                                                               | Studies on the quality of all available validated instruments to measure HRQoL in a particular population | Both                 | More than two instruments     | Multiple properties    |
| 204 | 2018 | Aber et al           | Themes that Determine Quality of Life in Patients with Peripheral Arterial Disease: A Systematic Review                                                                                                                            | Studies on the quality of all available validated instruments to measure HRQoL in a particular population | Both                 | More than two instruments     | One specific property  |
| 205 | 2018 | Chiarotto et al      | Evidence on the measurement properties of health-related quality of life instruments is largely missing in patients with low back pain, a systematic review.                                                                       | Studies on the quality of all available validated instruments to measure HRQoL in a particular population | Generic              | More than two instruments     | Multiple properties    |
| 206 | 2018 | Cornelissen et al    | Quality of Life Questionnaires in Breast Cancer-Related Lymphedema Patients: Review of the Literature                                                                                                                              | Studies on the quality of all available validated instruments to measure HRQoL in a particular population | Both                 | More than two instruments     | One specific property  |
| 207 | 2018 | de Vries et al       | Recommendations on the most suitable quality-of-life measurement instruments for bariatric and body contouring surgery: a systematic review.                                                                                       | Studies on the quality of a selection of instruments to measure HRQoL in a particular population          | Disease-specific     | More than two instruments     | Multiple properties    |
| 208 | 2018 | Dow et al            | How best to assess quality of life in informal carers of people with dementia; A systematic review of existing outcome measures                                                                                                    | Studies on the quality of all available validated instruments to measure HRQoL in a particular population | Both                 | More than two instruments     | Multiple properties    |
| 209 | 2018 | Grobet et al         | Application and measurement properties of EQ-5D to measure quality of life in patients with upper extremity orthopaedic disorders: a systematic literature review.                                                                 | Studies on the quality of one instrument to measure HRQoL in a particular population                      | Generic              | One instrument                | Multiple properties    |
| 210 | 2018 | Haywood et al        | Assessing health-related quality of life (HRQoL) in survivors of out-of-hospital cardiac arrest: A systematic review of patient-reported outcome measures                                                                          | Studies on the quality of all available validated instruments to measure HRQoL in a particular population | Both                 | More than two instruments     | Multiple properties    |
| 211 | 2018 | Luan et al           | A Review of Studies of Quality of Life for Chinese-Speaking Patients with Ischemic Heart Disease                                                                                                                                   | Studies on the quality of a selection of instruments to measure HRQoL in a particular population          | Both                 | More than two instruments     | Multiple properties    |
| 212 | 2018 | Mason et al          | Evaluating patient-reported outcome measures (PROMs) for bladder cancer: a systematic review using the COnsensus-based Standards for the selection of health Measurement Instruments (COSMIN)                                      | Studies on the quality of all available validated instruments to measure HRQoL in a particular population | Both                 | More than two instruments     | Multiple properties    |
| 213 | 2018 | Mohammed et al       | Pharmaceutical care and health related quality of life outcomes over the past 25 years: Have we measured dimensions that really matter?                                                                                            | Studies on the quality of all available validated instruments to measure HRQoL in a particular population | Both                 | More than two instruments     | One specific property  |
| 214 | 2018 | Mpundu-Kaambwa et al | A review of preference-based measures for the assessment of quality of life in children and adolescents with cerebral palsy.                                                                                                       | Studies on the quality of a selection of instruments to measure HRQoL in a particular population          | Both                 | More than two instruments     | Multiple properties    |
| 215 | 2018 | Pollo et al          | Evaluation Instruments for Quality of Life Related to Melasma: An Integrative Review.                                                                                                                                              | Studies on the quality of one instrument to measure HRQoL in a particular population                      | Disease-specific     | One instrument                | Multiple properties    |
| 216 | 2018 | Tian & Cao           | Systematic review of the psychometric properties of disease-specific, quality-of-life questionnaires for patients with hepatobiliary or pancreatic cancers                                                                         | Studies on the quality of a selection of instruments to measure HRQoL in a particular population          | Disease-specific     | More than two instruments     | Multiple properties    |
| 217 | 2018 | van Ierssel et al    | Identifying the concepts contained within health-related quality of life outcome measures in concussion research using the International Classification of Functioning, Disability, and Health as a reference: a systematic review | Studies on the quality of a selection of instruments to measure HRQoL in a particular population          | Disease-specific     | More than two instruments     | One specific property  |
| 218 | 2018 | van Roij et al       | Measuring health-related quality of life in patients with advanced cancer: a systematic review of self-administered measurement instruments.                                                                                       | Studies on the quality of all available validated instruments to measure HRQoL in a particular population | Both                 | More than two instruments     | Multiple properties    |
| 219 | 2018 | Yarlas et al         | Psychometric validation of the SF-36®Health Survey in ulcerative colitis: results from a systematic literature review                                                                                                              | Studies on the quality of one instrument to measure HRQoL in a particular population                      | Generic              | One instrument                | Multiple properties    |
| 220 | 2018 | Yazdani et al        | Psychometric Properties of Quality of Life Assessment Tools in Morbid Obesity: A Review of Literature.                                                                                                                             | Studies on the quality of all available validated instruments to measure HRQoL in a particular population | Both                 | More than two instruments     | Multiple properties    |
| 221 | 2018 | Zaror et al          | Assessing oral health-related quality of life in children and adolescents : a systematic review and standardized comparison of available instruments                                                                               | Studies on the quality of all available validated instruments to measure HRQoL in a particular population | Both                 | More than two instruments     | Multiple properties    |
| 222 | 2018 | Hettiarachchi et al  | Pediatric Quality of Life Instruments in Oral Health Research: A Systematic Review                                                                                                                                                 | Studies on the quality of all available validated instruments to measure HRQoL in a particular population | Both                 | More than two instruments     | Multiple properties    |

| ID  | Year | Author              | Title                                                                                                                                                                                                                  | Type of review                                                                                            | Instruments assessed | Number Instruments        | Measurement Properties |
|-----|------|---------------------|------------------------------------------------------------------------------------------------------------------------------------------------------------------------------------------------------------------------|-----------------------------------------------------------------------------------------------------------|----------------------|---------------------------|------------------------|
| 223 | 2019 | Balk et al.         | Psychometric properties of functional, ambulatory, and quality of life instruments in lower limb amputees: a systematic review                                                                                         | Studies on the quality of all available validated instruments to measure HRQoL in a particular population | Both                 | More than two instruments | Multiples properties   |
| 224 | 2019 | Belayneh et al.     | A systematic review of the psychometric properties of the cross-cultural adaptations and translations of the prolapse quality of life questionnaire                                                                    | Studies on the quality of one instrument to measures HRQoL in a particular population                     | Disease-specific     | One instrument            | Multiples properties   |
| 225 | 2019 | Bull et al.         | Systematic review: measurement properties of patient-reported outcome measures evaluated with childhood brain tumor survivors or other acquired brain injury                                                           | Studies on the quality of all available validated instruments to measure HRQoL in a particular population | Both                 | More than two instruments | Multiples properties   |
| 226 | 2019 | Choukou et al.      | Identifying and classifying quality of life tools for assessing neurogenic bowel dysfunction after spinal cord injury                                                                                                  | Studies on the quality of all available validated instruments to measure HRQoL in a particular population | Both                 | More than two instruments | Multiples properties   |
| 227 | 2019 | Daliya et al.       | A systematic review of patient reported outcome measures (PROMs) and quality of life reporting in patients undergoing laparoscopic cholecystectomy                                                                     | Studies on the quality of all available validated instruments to measure HRQoL in a particular population | Both                 | More than two instruments | Multiples properties   |
| 228 | 2019 | Gabes et al.        | Measurement properties of quality-of-life outcome measures for children and adults with eczema: An updated systematic review                                                                                           | Studies on the quality of all available validated instruments to measure HRQoL in a particular population | Both                 | More than two instruments | Multiples properties   |
| 229 | 2019 | Gondivkar et al.    | Assessment of oral health-related quality of life instruments for oral submucous fibrosis: A systematic review using the COSMIN-based Standards for the selection of health Measurement Instruments (COSMIN) checklist | Studies on the quality of all available validated instruments to measure HRQoL in a particular population | Both                 | More than two instruments | Multiples properties   |
| 230 | 2019 | Hasanvand et al.    | A Critical Review of Instruments Measuring the Quality of Life of Cancer Patients in Iranian Studies and Their Psychometrics Properties                                                                                | Studies on the quality of all available validated instruments to measure HRQoL in a particular population | Both                 | More than two instruments | Multiples properties   |
| 231 | 2019 | Hughes et al.       | Psychometric properties and feasibility of use of dementia specific quality of life instruments for use in care settings: a systematic review                                                                          | Studies on the quality of a selection of instruments to measure HRQoL in a particular population          | Disease-specific     | More than two instruments | Multiple properties    |
| 232 | 2019 | Hunt et al.         | Quality of life in older adults after traumatic brain injury: a systematic review                                                                                                                                      | Studies on the quality of all available validated instruments to measure HRQoL in a particular population | Both                 | More than two instruments | Multiples properties   |
| 233 | 2019 | Kamilu et al.       | Quality of life assessment scales in polio survivors: a scoping review                                                                                                                                                 | Studies on the quality of all available validated instruments to measure HRQoL in a particular population | Both                 | More than two instruments | Multiples properties   |
| 234 | 2019 | Lamsal et al.       | Generic preference-based health-related quality of life in children with neurodevelopmental disorders: a scoping review                                                                                                | Studies on the quality of a selection of instruments to measure HRQoL in a particular population          | Generic              | More than two instruments | Multiples properties   |
| 235 | 2019 | Moshki et al.       | The content comparison of health-related quality of life measures in heart failure based on the international classification of functioning, disability, and health: a systematic review                               | Studies on the quality of a selection of instruments to measure HRQoL in a particular population          | Disease-specific     | More than two instruments | One specific property  |
| 236 | 2019 | Speyer et al.       | "Measurement properties of self-report questionnaires on health related quality of life and functional health status in dysphonia: a systematic review using the COSMIN taxonomy"                                      | Studies on the quality of all available validated instruments to measure HRQoL in a particular population | Both                 | More than two instruments | Multiple properties    |
| 237 | 2019 | van der Hout et al. | Measuring health-related quality of life in colorectal cancer patients: systematic review of measurement properties of the EORTC QLQ-CR29                                                                              | Studies on the quality of one instrument to measures HRQoL in a particular population                     | Generic              | One instrument            | Multiple properties    |
| 238 | 2019 | Vasconcelos et al.  | Quality of Life in Women with Defecatory Dysfunctions: Systematic Review of Questionnaires Validated in the Portuguese Language                                                                                        | Studies on the quality of a selection of instruments to measure HRQoL in a particular population          | Disease-specific     | More than two instruments | Multiple properties    |
| 239 | 2020 | Crudgington et al.  | Epilepsy-specific patient-reported outcome measures of children's health related quality of life: a systematic review of measurement properties                                                                        | Studies on the quality of a selection of instruments to measure HRQoL in a particular population          | Disease-specific     | More than two instruments | Multiples properties   |
| 240 | 2020 | Furtado et al.      | Cross-cultural adaptations and measurement properties of the WORC (Western Ontario rotator cuff index): a systematic review                                                                                            | Studies on the quality of one instrument to measures HRQoL in a particular population                     | Disease-specific     | One instrument            | Multiples properties   |
| 241 | 2020 | Jones et al.        | A feasibility assessment of functioning and quality of life patient reported outcome measures in adult epilepsy clinics. A systematic review                                                                           | Studies on the quality of all available validated instruments to measure HRQoL in a particular population | Both                 | More than two instruments | Multiples properties   |
| 242 | 2020 | Killian et al.      | Measurement of health-related quality of life in pediatric organ transplantation recipients: a systematic review of the PedsQL transplant module                                                                       | Studies on the quality of one instrument to measures HRQoL in a particular population                     | Disease-specific     | One instrument            | Multiples properties   |

Note: The concept "Both" is referred to generic and disease-specific instruments.

| ID  | Year | Author                 | Title                                                                                                                                                                          | Type of review                                                                                            | Instruments assessed | Number Instruments        | Measurement Properties |
|-----|------|------------------------|--------------------------------------------------------------------------------------------------------------------------------------------------------------------------------|-----------------------------------------------------------------------------------------------------------|----------------------|---------------------------|------------------------|
| 243 | 2020 | Losada-Puente          | A systematic review of the assessment of quality of life in adolescents                                                                                                        | Studies on the quality of a selection of instruments to measure HRQoL in a particular population          | Disease-specific     | More than two instruments | Multiples properties   |
| 244 | 2020 | Moller et al.          | Specific measures of quality of life in patients with multimorbidity in primary healthcare: a systematic review on patient-reported outcomes measures' adequacy of measurement | Studies on the quality of one instrument to measure HRQoL in a particular population                      | Disease-specific     | More than two instruments | Multiples properties   |
| 245 | 2020 | Qian et al.            | Measurement properties of commonly used generic preference-based measures in East and South-East Asia: a systematic review                                                     | Studies on the quality of a selection of instruments to measure HRQoL in general population               | Generic              | More than two instruments | Multiples properties   |
| 246 | 2020 | Santana-Berlanga et al | Instruments to measure quality of life in institutionalised older adults: systematic review                                                                                    | Studies on the quality of all available validated instruments to measure HRQoL in a particular population | Both                 | More than two instruments | Multiples properties   |

Note: The concept "Both" is referred to generic and disease-specific instruments.

## REFERENCES

1. Barbosa T, Gavião M. Oral health-related quality of life in children: Part III. Is there agreement between parents in rating their children's oral health-related quality of life? A systematic review. *Int J Dent Hyg*. 2008;6(2):108–13.
2. Basra MKA, Fenech R, Gatt RM, Salek MS, Finlay AY. The Dermatology Life Quality Index 1994-2007: A comprehensive review of validation data and clinical results. *Br J Dermatol*. 2008;159(5):997–1035.
3. Carabin H, Sonleitner N, Keesee M, Shinault K. Quality of life measurement tools for people living with HIV/AIDS. *J HIV/AIDS Soc Serv*. 2008;7(1):71–82.
4. Chassany O, Holtmann G, Malagelada J, Gebauer U, Doerfler H, Devault K. Systematic review: health-related quality of life (HRQOL) questionnaires in gastro-oesophageal reflux disease. *Aliment Pharmacol Ther*. 2008;27(11):1053–70.
5. El Achhab Y, Nejari C, Chikri M, Lyoussi B. Disease-specific health-related quality of life instruments among adults diabetic: A systematic review. *Diabetes Res Clin Pract*. 2008;80(2):171–84.
6. Finger RP, Fleckenstein M, Holz FG, Scholl HPN. Quality of life in age-related macular degeneration: a review of available vision-specific psychometric tools. *Qual Life Res*. 2008;17(4):559–74.
7. Franic DM, Bothe AK. Psychometric Evaluation of Condition-Specific Instruments Used to Assess Health-Related Quality of Life, Attitudes, and Related Constructs in Stuttering. *Am J Speech*. 2008;17(1):60–80.
8. Janssens L, Gorter JW, Ketelaar M, Kramer WLM, Holtslag HR. Health-related quality-of-life measures for long-term follow-up in children after major trauma. *Qual Life Res*. 2008;17(5):701–13.
9. Klassen AF, Stotland MA, Skarsgard ED, Pusic AL. Clinical research in pediatric plastic surgery and systematic review of quality-of-life questionnaires. *Clin Plast Surg*. 2008;35:251–7.
10. Kluivers KB, Riphagen I, Vierhout ME, Brölmann HAM, de Vet HCW. Systematic review on recovery specific quality-of-life instruments. *Surgery*. 2008;143(2):206–15.
11. Langham S, Maggi M, Schulman C, Quinton R, Uhl-Hochgraeber K. Health-related quality of life instruments in studies of adult men with testosterone deficiency syndrome: A critical assessment. *J Sex Med*. 2008;5(12):2842–52.
12. Pearce NJM, Sanson-Fisher R, Campbell HS. Measuring quality of life in cancer survivors: a methodological review of existing scales. *Psychooncology*. 2008;17(7):629–40.
13. Price MA, Hill CD, Williams VS, Morlock RJ, Leewenkamp O, Patterson T. Measures of functional status and quality-of-life in schizophrenia. *Curr Psychiatry Rev*. 2008;4(1):28–38.
14. Quitner AL, Modi A, Cruz I. Systematic review of health-related quality of life measures for children with respiratory conditions. *Paediatr Respir Rev*. 2008;9(3):220–32.
15. Reaney MD, Martin C, Speight J. Understanding and Assessing the Impact of Alcoholism on Quality of Life. *Patient*. 2008;1(3):151–63.
16. Schlarmann J, Metzging-Blau S, Schnepf W, Schlarmann JG, Metzging-Blau S, Schnepf W, et al. The use of health-related quality of life (HRQOL) in children and adolescents as an outcome criterion to evaluate family oriented support for young carers in Germany: an integrative review of the literature. *BMC Public Health*. 2008;8(1):414.
17. Solans M, Pane S, Estrada M-D, Serra-Sutton V, Berra S, Herdman M, et al. Health-related quality of life measurement in children and adolescents: A systematic review of generic and disease-specific instruments. *Value Heal*. 2008;11(4):742–64.
18. Tschiesner U, Rogers SN, Harrés U, Berghaus A, Cieza A. Content comparison of quality of life questionnaires used in head and neck cancer based on the international classification of functioning, disability and health: A systematic review. *Eur Arch Oto-Rhino-Laryngology*. 2008;265(6):627–37.
19. Upton P, Lawford J, Eiser C. Parent-child agreement across child health-related quality of life instruments: a review of the literature. *Qual Life Res*. 2008;17(6):895–913.
20. Davies N. Measuring health-related. *Nurs Stand*. 2009;23(30):42–50.
21. Derrett S, Black J, Herbison GP. Outcome after injury-a systematic literature search of studies using the EQ-5D. *J Trauma*. 2009;67(4):883–90.
22. Epton J, Harris R, Jenkinson C. Quality of life in amyotrophic lateral sclerosis/motor neuron disease: a structured review. *Amyotroph Lateral Scler*. 2009;10(1):15–26.
23. Fitzsimmons D, Gilbert J, Howse F, Young T, Arrarras JI, Brédart A, et al. A systematic review of the use and validation of health-related quality of life instruments in older cancer patients. *Eur J Cancer*. 2009;45(1):19–32.
24. Garin O, Ferrer M, Pont À, Rué M, Kotzeva A, Wiklund I, et al. Disease-specific health-related quality of life questionnaires for heart failure: A systematic review with meta-analyses. *Qual Life Res*. 2009;18(1):71–85.
25. Garvie PA, Lawford J, Banet MS, West RL. Quality of life measurement in paediatric and adolescent populations with HIV: A review of the literature. *Childcare, Heal Dev*. 2009;35(4):440–53.
26. Guo N, Marra F, Marra CA. Measuring health-related quality of life in tuberculosis: a systematic review. *Health Qual Life Outcomes*. 2009;7:14.
27. Jay CL, Butt Z, Ladner DP, Skaro AI, Abecassis MM. A review of quality of life instruments used in liver transplantation. *J Hepatol*. 2009;51(5):949–59.
28. Speight J, Reaney MD, Barnard KD. Not all roads lead to Rome-a review of quality of life measurement in adults with diabetes. *Diabet Med*. 2009;26(4):315–27.
29. Street J, Berven S, Fisher C, Ryken T. Health Related Quality of Life Assessment in Metastatic Disease of the Spine. *Spine (Phila Pa 1976)*. 2009;34(Supplement):S128–34.
30. Waters E, Davis E, Ronen GM, Rosenbaum P, Livingston M, Saigal S. Quality of life instruments for children and adolescents with neurodisabilities: How to choose the appropriate instrument. Vol. 51, *Developmental Medicine & Child Neurology*. 2009. p. 660–9.

31. Wettergren L, Kettis-Lindblad Å, Sprangers M, Ring L. The use, feasibility and psychometric properties of an individualised quality-of-life instrument: A systematic review of the SEIQoL-DW. *Qual Life Res.* 2009;18(6):737–46.
32. Albers G, Echteld MA, de Vet HCW, Onwuteaka-Philipsen BD, van der Linden MHM, Deliens L. Evaluation of quality-of-life measures for use in palliative care: a systematic review. *Palliat Med.* 2010;24(1):17–37.
33. Branski RC, Cukier-Blaj S, Pusic A, Cano SJ, Klassen A, Mener D, et al. Measuring quality of life in dysphonic patients: a systematic review of content development in patient-reported outcomes measures. *J Voice.* 2010;23(2):193–8.
34. Bronsard V, Paul C, Prey S, Puzenat E, Gourraud P-A, Aractingi S, et al. What are the best outcome measures for assessing quality of life in plaque type psoriasis? A systematic review of the literature. *J Eur Acad Dermatol Venereol.* 2010;24 Suppl 2:17–22.
35. Carlon S, Shields N, Yong K, Gilmore R, Sakzewski L, Boyd R. A systematic review of the psychometric properties of Quality of Life measures for school aged children with cerebral palsy. *BMC Pediatr.* 2010;10:81.
36. Chen CM, Cano SJ, Klassen AF, King T, McCarthy C, Cordeiro PG, et al. Measuring Quality of Life in Oncologic Breast Surgery: A Systematic Review of Patient-Reported Outcome Measures. *Breast J.* 2010;16(6):587–97.
37. Danquah FVN, Wasserman J, Meininger J, Bergstrom N. Quality of life measures for patients on hemodialysis: a review of psychometric properties. *Nephrol Nurs J.* 2010;37(3):255–69; quiz 270.
38. Forhan M, Vrkljan B, MacDermid J. A systematic review of the quality of psychometric evidence supporting the use of an obesity-specific quality of life measure for use with persons who have class III obesity: Diagnostic in Obesity and Complications. *Obes Rev.* 2010;11(3):222–8.
39. Hill MR, Noonan VK, Sakakibara BM, Miller WC, SCIRE. Quality of life instruments and definitions in individuals with spinal cord injury: A systematic review. *Spinal Cord.* 2010;48(6):438–50.
40. Kamalski DM, Hoekstra CE, van Zanten BG, Grolman W, Rovers MM. Measuring disease-specific health-related quality of life to evaluate treatment outcomes in tinnitus patients: a systematic review. *Otolaryngol Neck Surg.* 2010;143(2):181–5.
41. Klassen AF, Strohm SJ, Maurice-Stam H, Grootenhuis MA. Quality of life questionnaires for children with cancer and childhood cancer survivors: a review of the development of available measures. *Support Care Cancer.* 2010 Sep;18(9):1207–17.
42. Kwon BE, Kim GY, Son YJ, Roh YS, You MA. Quality of life of women with urinary incontinence: a systematic literature review. *Int Neurourol J.* 2010;14(3):133–8.
43. Luckett T, King M, Butow P, Friedlander M, Paris T. Assessing health-related quality of life in gynecologic oncology: a systematic review of questionnaires and their ability to detect clinically important differences and change. *Int J Gynecol Cancer.* 2010;20(4):664–84.
44. Palfreyman SJ, Shackley P, Brazier JE. Assessing current health-related quality of life questionnaires administered to patients with venous ulcers: Can they be used in economic evaluations? Vol. 19, *Journal of Clinical Nursing.* 2010. p. 892–7.
45. Palfreyman SJ, Tod AM, Brazier JE, Michaels JA, SJ P, AM T, et al. A systematic review of health-related quality of life instruments used for people with venous ulcers: an assessment of their suitability and psychometric properties. *J Clin Nurs.* 2010;19(19–20):2673–703.
46. Passarelli P, Stefano SC, Blay SL. Validity Studies of Quality of Life Instruments for Eating Disorders. *J Nerv Ment Dis.* 2010;198(12):854–9.
47. Riordain RN, McCreary C. The use of quality of life measures in oral medicine: A review of the literature. *Oral Dis.* 2010;16(5):419–30.
48. Speight J, Howarth A. Quality of life in restless legs syndrome: A systematic review of clinical trials and a critical review of instruments. Vol. 3, *The Patient.* 2010. p. 185–203.
49. Street J, Lenehan B, Berven S, Fisher C. Introducing a New Health-Related Quality of Life Outcome Tool for Metastatic Disease of the Spine. *Spine (Phila Pa 1976).* 2010;35(14):1377–86.
50. Zeng YC, Ching SSY, Loke AY. Quality of life measurement in women with cervical cancer: implications for Chinese cervical cancer survivors. Vol. 8, *Health and Quality of Life Outcomes.* 2010. p. 30.
51. Carlton J, Kaltenthaler E. Amblyopia and quality of life: a systematic review. *Eye.* 2011;25(4):403–13.
52. Carlton J, Kaltenthaler E. Health-related quality of life measures (HRQoL) in patients with amblyopia and strabismus: A systematic review. *Br J Ophthalmol.* 2011;95(3):325–30.
53. da Silva SA, Passos SRL, Carballo MT, Figueiró M. Quality of Life Assessment after Acute Coronary Syndrome : Systematic Review. *Arq Bras Cardiol.* 2011;97(6):526–40.
54. Eckstein DA, Wu RL, Akinbiyi T, Silver L, Taub PJ. Measuring Quality of Life in Cleft Lip and Palate Patients. *Plast Reconstr Surg.* 2011;128(5):518e-526e.
55. Fayed N, Schiariti V, Bostan C, Cieza A, Klassen A. Health status and QOL instruments used in childhood cancer research: deciphering conceptual content using World Health Organization definitions. *Qual Life Res.* 2011;20(8):1247–58.
56. Glover C, Banks P, Carson A, Martin CR, Duffy T. Understanding and Assessing the Impact of Alcoholism on Quality of Life. *Patient.* 2011;4(1):10–30.
57. González-Consuegra RV, Verdú J. Quality of life in people with venous leg ulcers: An integrative review. *J Adv Nurs.* 2011;67(5):926–44.
58. Hounsone N, Orrell M, Edwards RT. EQ-5D as a quality of life measure in people with dementia and their carers: evidence and key issues. *Value Heal.* 2011;14(2):390–9.
59. Janssen MF, Lubetkin EI, Sekhobo JP, Pickard AS. The use of the EQ-5D preference-based health status measure in adults with Type 2 diabetes mellitus. *Diabet Med.* 2011;28(4):395–413.
60. Kowal-Bielecka O, Avouac J, Pittrow D, Huscher D, Behrens F, Denton CP, et al. Analysis of the validation status of quality of life and functional disability measures in pulmonary arterial hypertension related to systemic sclerosis: Results of a systematic literature analysis by the expert panel on outcomes measures in pulmonary art. *J Rheumatol.* 2011;38(11):2419–27.
61. Lien K, Zeng L, Nguyen J, Cramarossa G, Culleton S, Caissie A, et al. Comparison of the EORTC QLQ-C15-PAL and the FACIT-Pal for assessment of quality of life in patients with advanced cancer. *Expert Rev Pharmacoecon Outcomes Res.* 2011;11(5):541–6.

62. Luckett T, King MT, Butow PN, Oguchi M, Rankin N, Price MA, et al. Choosing between the EORTC QLQ-C30 and FACT-G for measuring health-related quality of life in cancer clinical research: Issues, evidence and recommendations. *Ann Oncol*. 2011;22(10):2179–90.
63. Mordiffi SZ, Kin YW, NK EA. Quality of life tools for adult patients with cancer undergoing chemotherapy: a systematic review. *JBI*. 2011;9(57):2482–532.
64. Noyes J, Edwards RT. EQ-5D for the assessment of health-related quality of life and resource allocation in children: A systematic methodological review. *Value Heal*. 2011;14(8):1117–29.
65. Papaioannou D, Brazier J, Parry G. How valid and responsive are generic health status measures, such as EQ-5D and SF-36, in Schizophrenia? A systematic review. *Value Heal*. 2011;14(6):907–20.
66. Reavey PL, Klassen AF, Cano SJ, McCarthy C, Scott A, Rubin JP, et al. Measuring quality of life and patient satisfaction after body contouring: a systematic review of patient-reported outcome measures. *Aesthetic Surg J*. 2011;31(7):807–13.
67. Schiariti V, Fayed N, Cieza A, Klassen A, O'Donnell M. Content comparison of health-related quality of life measures for cerebral palsy based on the International Classification of Functioning. Vol. 33, *Disability and Rehabilitation*. Informa Healthcare; 2011. p. 1330–9.
68. Tayyem R, Ali A, Atkinson J, Martin CR. Analysis of Health-Related Quality-of-Life Instruments Measuring the Impact of Bariatric Surgery. *Patient*. 2011;4(2):73–87.
69. Whitehurst DGT, Bryan S, Lewis M. Systematic review and empirical comparison of contemporaneous EQ-5D and SF-6D group mean scores. *Med Decis Making*. 2011;31(6):E34–44.
70. Wilson JR, Hashimoto RE, Dettori JR, Fehlings MG. Spinal cord injury and quality of life: a systematic review of outcome measures. *Evid Based Spine Care J*. 2011;2(1):37–44.
71. Bhatt JK, Thomas S, Nanjan MJ. Health outcome measures for diabetes mellitus: A review. Vol. 7, *Applied Research in Quality of Life*. Springer; 2012. p. 413–43.
72. Chopra I, Kamal KM. A systematic review of quality of life instruments in long-term breast cancer survivors. *Health Qual Life Outcomes*. 2012;10(1):1–15.
73. Cormier JN, Cromwell DD, Ross MI. Health-related quality of life in patients with melanoma: overview of instruments and outcomes. *Dermatol Clin*. 2012;30(2):245–54.
74. Correia FR, De Carlo MMR do P. Evaluation of quality of life in a palliative care context: an integrative literature review. *Rev Lat Am Enfermagem*. 2012;20(2):401–10.
75. Gräske J, Fischer T, Kuhlmeier A, Wolf-Ostermann K. Dementia-Specific Quality of Life Instruments and Their Appropriateness in Shared-Housing Arrangements-A Literature Study. *Geriatr Nurs (Minneapolis)*. 2012;33(3):204–16.
76. Ho AL, Scott AM, Klassen AF, Cano SJ, Pusic AL, Van Laeken N. Measuring Quality of Life and Patient Satisfaction in Facial Paralysis Patients. *Plast Reconstr Surg*. 2012 Jul;130(1):91–9.
77. Hogg FRA, Peach G, Price P, Thompson MM, Hinchliffe RJ. Measures of health-related quality of life in diabetes-related foot disease: A systematic review. *Diabetologia*. 2012;55(3):552–65.
78. Luquiens A, Reynaud M, Falissard B, Aubin HJ. Quality of life among alcohol-dependent patients: How satisfactory are the available instruments? A systematic review. Vol. 125, *Drug and Alcohol Dependence*. 2012. p. 192–202.
79. Madureira MM, Ciconelli RM, Pereira RMR. Quality of life measurements in patients with osteoporosis and fractures. *Clinics*. 2012;67(11):1315–20.
80. Milne A, Johnson JA, Tennant M, Rudniski C, Dryden DM. Measuring Health-Related Quality of Life for Patients With Diabetic Retinopathy. *Technol Assess*. 2012;267–309.
81. Ojo B, Genden EM, Teng MS, Milbury K, Misisukiewicz KJ, Badr H. A systematic review of head and neck cancer quality of life assessment instruments. *Oral Oncol*. 2012;48(10):92–937.
82. Popovic M, Nguyen J, Chen E, Di Giovanni J, Zeng L, Chow E. Comparison of the EORTC QLQ-BM22 and the FACT-BP for assessment of quality of life in cancer patients with bone metastases. *Expert Rev Pharmacoeconomics Outcomes Res*. 2012;12(2):213–9.
83. Quintanilla-Dieck L, Litvack JR, Made JC, Smith TL. Comparison of disease-specific quality-of-life instruments in the assessment of chronic rhinosinusitis. *Int Forum Allergy Rhinol*. 2012;2(6):437–43.
84. Rajmil L, Roizen M, Psy AU, Hidalgo-Rasmussen C, Fernandez G, Daputo JJ. Health-related quality of life measurement in children and adolescents in Ibero-American countries, 2000 to 2010. *Value Heal*. 2012;15(2):312–22.
85. Shin H, Shin HS. Measurement of quality of life in menopausal women: a systematic review. *West J Nurs Res*. 2012;34(4):475–503.
86. Smith SC, Lamping DL, Maclaine GDH. Measuring health-related quality of life in diabetic peripheral neuropathy: a systematic review. *Diabetes Res Clin Pract*. 2012;96(3):261–70.
87. Tosh J, Brazier J, Evans P, Longworth L. A review of generic preference-based measures of health-related quality of life in visual disorders. *Value Heal*. 2012;15(1):118–27.
88. Townsend-White C, Pham ANT, Vassos M V. Review: a systematic review of quality of life measures for people with intellectual disabilities and challenging behaviours. *J Intellect Disabil Res*. 2012;56(3):270–84.
89. Walker H, Tulloch L, Martin C. Are they worth it? A systematic review of QOL instruments for use with mentally disordered offenders who have a diagnosis of psychosis. Vol. 14, *The British Journal of Forensic Practice*. 2012. p. 252–68.
90. Whitehurst DGT, Noonan VK, Dvorak MFS, Bryan S. A review of preference-based health-related quality of life questionnaires in spinal cord injury research. *Spinal Cord*. 2012;50(9):646–54.
91. Yip WK, Mordiffi SZ, Ang E. Reliability, validity and feasibility of quality of life instruments for adult patients with cancer undergoing chemotherapy: Result from a systematic review. *Int J Evid Based Healthc*. 2012;10(1):27–52.
92. Al Sayah F, Ishaque S, Lau D, Johnson JA. Health related quality of life measures in Arabic speaking populations: A systematic review on cross-cultural adaptation and measurement properties. *Qual Life Res*. 2013;22(1):213–29.



93. Basra MKA, Gada V, Ungaro S, Finlay AY, Salek SM. Infants' Dermatitis Quality of Life Index: a decade of experience of validation and clinical application. *Br J Dermatol.* 2013;169(4):760–8.
94. Castellino M, Abbott J, McElhone K, Teh LS. Comparison of the psychometric properties of health-related quality of life measures used in adults with systemic lupus erythematosus: A review of the literature. *Rheumatology.* 2013;52(4):684–96.
95. Chandratre P, Roddy E, Clarson L, Richardson J, Hider SL, Mallen CD. Health-related quality of life in gout: A systematic review. *Rheumatology.* 2013;52(11):2031–40.
96. Chow MYK, Morrow AM, Cooper Robbins SC, Leask J. Condition-specific quality of life questionnaires for caregivers of children with pediatric conditions: A systematic review. *Qual Life Res.* 2013;22(8):2183–200.
97. Davis S, Wailoo A. A review of the psychometric performance of the EQ-5D in people with urinary incontinence. *Health Qual Life Outcomes.* 2013;11:20.
98. de Almeida JR, Witterick IJ, Gullane PJ, Gentili F, Lohfeld L, Ringash J, et al. Quality of life instruments for skull base pathology: Systematic review and methodologic appraisal. *Head Neck.* 2013;36(10):1391.
99. Djan R, Penington A. A systematic review of questionnaires to measure the impact of appearance on quality of life for head and neck cancer patients. *J Plast Reconstr Aesthetic Surg.* 2013;66(5):647–59.
100. Gakhar H, Kamalli A, Holodniy M. Health-related Quality of Life Assessment after Antiretroviral Therapy: A Review of the Literature. *Drugs.* 2013;73(7):651–72.
101. Hitzig SL, Balioussis C, Nussbaum E, McGillivray CF, Catharine Craven B, Noreau L. Identifying and classifying quality-of-life tools for assessing pressure ulcers after spinal cord injury. *J Spinal Cord Med.* 2013;36(6):600–15.
102. Jabir S. Assessing Improvement in Quality of Life and Patient Satisfaction following Body Contouring Surgery in Patients with Massive Weight Loss: A Critical Review of Outcome Measures Employed. *Plast Surg Int.* 2013;
103. Lee EH, Klassen AF, Nehal KS, Cano SJ, Waters J, Pusic AL. A systematic review of patient-reported outcome instruments of nonmelanoma skin cancer in the dermatologic population. *J Am Acad Dermatol.* 2013;69(2):e59–67.
104. Levterova BA, Dimitrova DD, Levterov GE, Dragova EA. Instruments for Disease-Specific Quality-of-Life Measurement in Patients with Type 2 Diabetes Mellitus - A Systematic Review / Инструменты Для Оценки Специфического Качества Жизни Пациентов, Больных Сахарным Диабетом Типа 2. *Folia Med (Plovdiv).* 2013;55(1):83–92.
105. Li C, Tsoi EWS, Zhang AL, Chen S, Wang CKJ. Psychometric properties of self-reported quality of life measures for people with intellectual disabilities: A systematic review. Vol. 25, *Journal of Developmental and Physical Disabilities.* Springer; 2013. p. 253–70.
106. Lin FJ, Longworth L, Pickard AS. Evaluation of content on EQ-5D as compared to disease-specific utility measures. *Qual Life Res.* 2013;22(4):853–74.
107. Mitera G, Zeiadin N, Sahgal A, Finkelstein J, Chow E, Loblaw A. Quality of life measures used in radiation therapy trials for patients with Metastatic Spinal Cord Compression (MSCC). In: *Advanced Cancer.* 2013. p. 97–106.
108. Mogos MF, August EM, Salinas-Miranda AA, Sultan DH, Salihu HM. A Systematic Review of Quality of Life Measures in Pregnant and Postpartum Mothers. *Appl Res Qual Life.* 2013;8(2):219–50.
109. Mousavi SA, Masoumi SZ, Keramat A, Pooralajal J, Shobeiri F, Abbas Mousavi S, et al. Assessment of Questionnaires Measuring Quality of Life in Infertile Couples: A Systematic Review. *J Reprod Infertil.* 2013 Jul;14(3):110–9.
110. Moyle W, Murfield JE. Health-related quality of life in older people with severe dementia: challenges for measurement and management. *Expert Rev Pharmacoeconomics Outcomes Res.* 2013;13(1):109–22.
111. Muzzatti B, Annunziata MA. Assessing quality of life in long-term cancer survivors: a review of available tools. *Support Care Cancer.* 2013;21(11):3143–52.
112. Paltzer J, Barker E, Witt WP. Measuring the health-related quality of life (HRQoL) of young children in resource-limited settings: a review of existing measures. *Qual Life Res.* 2013;22(6):1177–87.
113. Perales J, Cosco TD, Stephan BCM, Haro JM, Brayne C. Health-related quality-of-life instruments for Alzheimer's disease and mixed dementia. *Int Psychogeriatrics.* 2013;25(5):691–706.
114. Pusic AL, Cemal Y, Albornoz C, Klassen A, Cano S, Sulimanoff I, et al. Quality of life among breast cancer patients with lymphedema: A systematic review of patient-reported outcome instruments and outcomes. *J Cancer Surviv.* 2013;7(1):83–92.
115. Roncada C, Mattiello R, Pitrez PM, Sarria EE. Specific instruments to assess quality of life in children and adolescents with asthma. *J Pediatr (Rio J).* 2013;89(3):217–25.
116. Salek MS, Jung S, Brincat-Ruffini LA, MacFarlane L, Lewis-Jones MS, Basra MKA, et al. Clinical experience and psychometric properties of the Children's Dermatology Life Quality Index (CDLQI), 1995-2012. *Br J Dermatol.* 2013;169(4):734–59.
117. Testart J, Richieri R, Caqueo-Urizar A, Lancon C, Auquier P, Boyer L. Quality of life and other outcome measures in caregivers of patients with schizophrenia. *Expert Rev Pharmacoeconomics Outcomes Res.* 2013;13(5):641–9.
118. Weldam SWM, Schuurmans MJ, Liu R, Lammers JWJ. Evaluation of Quality of Life instruments for use in COPD care and research: A systematic review. *Int J Nurs Stud.* 2013;50(5):688–707.
119. Wheelwright S, Darlington A-S, Hopkinson JB, Fitzsimmons D, White A, Johnson CD. A systematic review of health-related quality of life instruments in patients with cancer cachexia. *Support Care Cancer.* 2013;21(9):2625–36.
120. Yang Y, Longworth L, Brazier J. An assessment of validity and responsiveness of generic measures of health-related quality of life in hearing impairment. Vol. 22, *Quality of Life Research.* 2013. p. 2813–28.
121. Anthony SJ, Selkirk E, Sung L, Klaassen RJ, Dix D, Scheinemann K, et al. Considering quality of life for children with cancer: a systematic review of patient-reported outcome measures and the development of a conceptual model. *Qual Life Res.* 2014;23(3):771–89.
122. Aspden T, Bradshaw SA, Playford ED, Riazi A. Quality-of-life measures for use within care homes: A systematic review of their measurement properties. *Age Ageing.* 2014;43(5):596–603.
123. Balioussis C, Hitzig S, Flett H, Noreau L, Craven B. Identifying and Classifying Quality of Life Tools for Assessing Spasticity After Spinal Cord Injury. *Top Spinal Cord Inj Rehabil.* 2014;20(3):208–24.

124. Brazier J, Connell J, Papaioannou D, Mukuria C, Mulhern B, Peasgood T, et al. A systematic review, psychometric analysis and qualitative assessment of generic preference-based measures of health in mental health populations and the estimation of mapping functions from widely used specific measures. *Health Technol Assess (Rockv)*. 2014;18(34):1–188.
125. Chiu L, Chiu N, Chow E, Cella D, Beaumont JL, Lam H, et al. Comparison of Three Shortened Questionnaires for Assessment of Quality of Life in Advanced Cancer. *J Palliat Med*. 2014;17(8):918–23.
126. Chow R, Lao N, Popovic M, Chow E, Cella D, Beaumont J, et al. Comparison of the EORTC QLQ-BN20 and the FACT-Br quality of life questionnaires for patients with primary brain cancers: a literature review. *Support Care Cancer*. 2014;22(9):2593–8.
127. Garin O, Herdman M, Vilagut G, Ferrer M, Ribera A, Rajmil L, et al. Assessing health-related quality of life in patients with heart failure: a systematic, standardized comparison of available measures. *Heart Fail Rev*. 2014;19(3):359–67.
128. Gilchrist F, Rodd H, Deery C, Marshman Z. Assessment of the quality of measures of child oral health-related quality of life. *BMC Oral Health*. 2014;14:40.
129. Grubbs JR, Tolleson-Rinehart S, Huynh K, Davis RM. A review of Quality of Life Measures in Dry Eye Questionnaires. 2014;33(2):215–8.
130. Gupta N, Pinto LM, Morogan A, Bourbeau J. The COPD assessment test: a systematic review. *Eur Respir J*. 2014;44(4):873–84.
131. Hawkins AT, Henry AJ, Crandell DM, Nguyen LL. A systematic review of functional and quality of life assessment after major lower extremity amputation. *Ann Vasc Surg*. 2014;28(3):763–80.
132. Hewison A, Mccaughan D, Watt I. An evaluative review of questionnaires recommended for the assessment of quality of life and symptom severity in women with urinary incontinence. *J Clin Nurs*. 2014;23(21–22):2998–3011.
133. Ikeda E, Hincson E, Krageloh C. Assessment of quality of life in children and youth with autism spectrum disorder: a critical review. *Qual Life Res*. 2014;23(4):1069–85.
134. Jardine J, Glinianaia S V, McConachie H, Embleton ND, Rankin J. Self-reported quality of life of young children with conditions from early infancy: a systematic review. *Pediatrics*. 2014;134(4):e1129–48.
135. Kuspinar A, Mayo NE. A review of the psychometric properties of generic utility measures in multiple sclerosis. Vol. 32, *Pharmacoeconomics*. Springer; 2014. p. 759–73.
136. Lee J, Kim SH, Moon SH, Lee EH. Measurement properties of rheumatoid arthritis-specific quality-of-life questionnaires: systematic review of the literature. *Qual Life Res*. 2014;23(10):2779–91.
137. Lieu JEC, Chalivendra V, Ead B. Pediatric quality of life in children with otolaryngologic disease: what inventories are available and what is still needed? *Curr Opin Otolaryngol Head Neck Surg*. 2014;22(6):506–20.
138. Longworth L, Yang Y, Young T, Mulhern B, Hernández Alava M, Mukuria C, et al. Use of generic and condition-specific measures of health-related quality of life in NICE decision-making: A systematic review, statistical modelling and survey. *Health Technol Assess (Rockv)*. 2014;18(9):1–224.
139. Makai P, Brouwer WBF, Koopmanschap MA, Stolk EA, Nieboer AP. Quality of life instruments for economic evaluations in health and social care for older people: a systematic review. *Soc Sci Med*. 2014;102:83–93.
140. Niu H-Y, Niu C-Y, Wang J-H, Zhang Y, He P. Health-related quality of life in women with breast cancer: a literature-based review of psychometric properties of breast cancer-specific measures. *Asian Pacific J Cancer Prev*. 2014;15(8):3533–6.
141. Salvilla SA, Dubois AEJ, Flokstra-De Blok BMJ, Panesar SS, Worth A, Patel S, et al. Disease-specific health-related quality of life instruments for IgE-mediated food allergy. *Allergy*. 2014;69(7):834–44.
142. Schmidt S, Garin O, Pardo Y, Valderas JM, Alonso J, Rebollo P, et al. Assessing quality of life in patients with prostate cancer: a systematic and standardized comparison of available instruments. *Qual Life Res*. 2014 Oct;23(8):2169–81.
143. Smith AB, Cocks K, Taylor M, Parry D. Most domains of the European Organisation for Research and Treatment of Cancer Quality of Life Questionnaire C30 are reliable. *J Clin Epidemiol*. 2014;67(8):952–7.
144. Souza JGS, Pamponet MA, Souza TCS, Pereira AR, Souza AGS, Martins AME d. BL. Tools used for evaluation of Brazilian children's quality of life. *Rev Paul Pediatr*. 2014;32(2):272–8.
145. Swigris JJ, Esser D, Conoscenti CS, Brown KK. The psychometric properties of the St George's Respiratory Questionnaire (SGRQ) in patients with idiopathic pulmonary fibrosis: a literature review. *Health Qual Life Outcomes*. 2014;12:124.
146. Timmerman AA, Speyer R, Heijnen BJ, Klijn-Zwijenberg IR. Psychometric characteristics of health-related quality-of-life questionnaires in oropharyngeal dysphagia. *Dysphagia*. 2014;29(2):183–98.
147. Watt T, Cramon P, Frenzl DM, Ware JE. Assessing health-related quality of life in patients with benign non-toxic goitre. *Best Pract Res Clin Endocrinol Metab*. 2014;28(4):559–75.
148. Wolpe RE, Toriy AM, da Silveira GF, Cardoso FL, Sperandio FF. Assessing the impact of urinary incontinence on quality of life: systematic review of instruments in Portuguese. *Man Ther Posturology Rehabil J*. 2014;12(1):273–80.
149. Alrubaiy L, Rikaby I, Dodds P, Hutchings HA, Williams JG. Systematic review of health-related quality of life measures for inflammatory bowel disease. *J Crohn's Colitis*. 2015;9(3):284–92.
150. Aspesberro F, Mangione-Smith R, Zimmerman JJ. Health-related quality of life following pediatric critical illness. *Intensive Care Med*. 2015;41(7):1235–46.
151. Bédard E, Kergoat HH, Kergoat M-J, Leclerc B-S, Bedard E, Kergoat HH, et al. Systematic review of vision-related quality of life questionnaires for older institutionalised seniors with dementia. *Ophthalmic Physiol Opt*. 2015;35(4):377–87.
152. Bowling A, Rowe G, Adams S, Sands P, Samsi K, Crane M, et al. Quality of life in dementia: a systematically conducted narrative review of dementia-specific measurement scales. *Aging Ment Health*. 2015;19(1):13–31.
153. Conijn AP, Jens S, Terwee CB, Breek JC, Koelemay MJW. Assessing the quality of available patient reported outcome measures for intermittent claudication: a systematic review using the COSMIN checklist. *Eur J Vasc Endovasc Surg*. 2015;49(3):316–34.
154. de Climens AR, Tunceli K, Arnould B, Germain N, Iglay K, Norquist J, et al. Review of patient-reported outcome instruments measuring health-related quality of life and satisfaction in patients with type 2 diabetes treated with oral therapy. *Curr Med Res Opin*. 2015 Apr;31(4):643–65.

155. Dronavalli M, Thompson SC. A systematic review of measurement tools of health and well-being for evaluating community-based interventions. Vol. 69, *Journal of Epidemiology and Community Health*. 2015. p. 805–15.
156. Hamoen EHJ, De Rooij M, Witjes JA, Barentsz JO, Rovers MM. Measuring health-related quality of life in men with prostate cancer: A systematic review of the most used questionnaires and their validity. *Urol Oncol*. 2015;33(2):69.e19-69.e28.
157. Hu H, Luan L, Li S-C. How Quality of Life as Patient-Reported Outcome Has Been Studied for Rheumatoid Arthritis in Chinese-Speaking Population. *Value Heal Reg Issues*. 2015;6:98–102.
158. Janssens A, Rogers M, Gumm R, Jenkinson C, Tennant A, Logan S, et al. Measurement properties of multidimensional patient-reported outcome measures in neurodisability: a systematic review of evaluation studies. *Dev Med Child Neurol*. 2015;58(5):437–51.
159. Launois R. Health-related quality-of-life scales specific for chronic venous disorders of the lower limbs. *J Vase Surg Venous Lymphat Disord*. 2015;3(2):219-227.e3.
160. Monticone M, Nava C, Leggero V, Rocca B, Salvaderi S, Ferrante S, et al. Measurement properties of translated versions of the Scoliosis Research Society-22 Patient Questionnaire, SRS-22: a systematic review. *Qual Life Res*. 2015;24(8):1981–98.
161. Nguyen J, Popovic M, Chow E, Cella D, Beaumont JL, Chu D, et al. EORTC QLQ-BR23 and FACT-B for the assessment of quality of life in patients with breast cancer: A literature review. *J Comp Eff Res*. 2015;4(2):157–66.
162. Oliveira IS, da Cunha Menezes Costa L, Fagundes FRC, Cabral CMN. Evaluation of cross-cultural adaptation and measurement properties of breast cancer-specific quality-of-life questionnaires: a systematic review. *Qual Life Res*. 2015;24(5):1179–95.
163. Polinder S, Haagsma JA, van Klaveren D, Steyerberg EW, van Beeck EF. Health-related quality of life after TBI: a systematic review of study design, instruments, measurement properties, and outcome. *Popul Health Metr*. 2015;13:4.
164. Taghavi SA, Bazarganipour F, Montazeri A, Kazemnejad A, Chaman R, Khosravi A. Health-related quality of life in polycystic ovary syndrome patients: A systematic review. *Iran J Reprod Med*. 2015;13(8):473–82.
165. Treanor C, Donnelly M. A methodological review of the Short Form Health Survey 36 (SF-36) and its derivatives among breast cancer survivors. *Qual Life Res*. 2015;24(2):339–62.
166. Wong CKH, Chen J, Yu CLY, Sham M, Lam CLK. Systematic review recommends the European Organization for Research and Treatment of Cancer colorectal cancer-specific module for measuring quality of life in colorectal cancer patients. *J Clin Epidemiol*. 2015;68(3):266–78.
167. Algar K, Woods RT, Windle G. Measuring the quality of life and well-being of people with dementia: A review of observational measures. *Dementia*. 2016;15(4):832–57.
168. Bryant AL, Walton A, Shaw-Kokot J, Mayer DK, Reeve BB. A systematic review of psychometric properties of health-related quality-of-life and symptom instruments in adult acute leukemia survivors. *Cancer Nurs*. 2016;39(5):375–82.
169. Coombes LH, Wiseman T, Lucas G, Sangha A, Murtagh FE. Health-related quality-of-life outcome measures in paediatric palliative care: A systematic review of psychometric properties and feasibility of use. *Palliat Med*. 2016;30(10):935–49.
170. Dichter MN, Schwab CGG, Meyer G, Bartholomeyczik S, Halek M. Linguistic validation and reliability properties are weak investigated of most dementia-specific quality of life measurements - A systematic review. *J Clin Epidemiol*. 2016;70:233–45.
171. Ganesh V, Agarwal A, Popovic M, Cella D, McDonald R, Vuong S, et al. Comparison of the FACT-C, EORTC QLQ-CR38, and QLQ-CR29 quality of life questionnaires for patients with colorectal cancer: a literature review. *Support Care Cancer*. 2016;24(8):3661–8.
172. Gutiérrez-Vargas R, Díaz-García ML, Villasis-Keever MÁ, Portilla-Robertson J, Zapata-Tárres M. Instruments to measure the quality of life in patients with oral mucositis undergoing oncological treatment: a systematic review of the literature. *Bol Med Hosp Infant Mex*. 2016;73(6):457–66.
173. Hand C. Measuring health-related quality of life in adults with chronic conditions in primary care settings. *Canadian Family Physician*. *Can Fam Physician*. 2016;62(7):375–83.
174. Heint D, Prinsen CAC, Deckert S, Chalmers JR, Drucker AM, Ofenloch R, et al. Measurement properties of adult quality-of-life measurement instruments for eczema: a systematic review. *Allergy*. 2016;71(3):358–70.
175. Kotecha D, Ahmed A, Calvert M, Lencioni M, Terwee CB, Lane DA. Patient-Reported Outcomes for Quality of Life Assessment in Atrial Fibrillation: A Systematic Review of Measurement Properties. *PLoS One*. 2016;11(11):e0165790.
176. Lee J, Lee E-H, Moon SH. A systematic review of measurement properties of the instruments measuring health-related quality of life in patients with irritable bowel syndrome. *Qual Life Res*. 2016;25(12):2985–95.
177. Maratia S, Cedillo S, Rejas J. Assessing health-related quality of life in patients with breast cancer: a systematic and standardized comparison of available instruments using the EMPRO tool. *Qual Life Res*. 2016;25(10):2467–80.
178. Mestre TA, van Duijn E, Davis AM, Bachoud-Lévi AC, Busse M, Anderson KE, et al. Rating scales for behavioral symptoms in Huntington's disease: Critique and recommendations. *Mov Disord*. 2016;31(10):1466–78.
179. Spinou A, Fragkos KC, Lee KK, Elston C, Siegert RJ, Loebinger MR, et al. The validity of health-related quality of life questionnaires in bronchiectasis: a systematic review and meta-analysis. *Thorax*. 2016;71(8):683–94.
180. Tapia VJ, Epstein S, Tolmach OS, Hassan AS, Chung NN, Gosman AA. Health-related quality-of-life instruments for pediatric patients with diverse facial deformities: A systematic literature review. *Plast Reconstr Surg*. 2016;138(1):175–87.
181. Wong CKH, Lang BHH, Lam CLK. A systematic review of quality of thyroid-specific health-related quality-of-life instruments recommends ThyPRO for patients with benign thyroid diseases. *J Clin Epidemiol*. 2016;78:63–72.
182. Woo A, Fu T, Popovic M, Chow E, Cella D, Wong CS, et al. Comparison of the EORTC STO-22 and the FACT-Ga quality of life questionnaires for patients with gastric cancer. *Ann Palliat Med*. 2016;5(1):13–21.
183. Ahmadi A, Tohidast SA, Mansuri B, Kamali M, Krishnan G. Acceptability, reliability, and validity of the Stroke and Aphasia Quality of Life Scale-39 (SAQOL-39) across languages: a systematic review. *Clin Rehabil*. 2017;31(9):1201–14.
184. Baghdadli A, Russet F, Mottion L. Measurement properties of screening and diagnostic tools for autism spectrum adults of mean normal intelligence: A systematic review. *Eur Psychiatry*. 2017;44:104–24.
185. Best KL, Ethans K, Craven BC, Noreau L, Hitzig SL. Identifying and classifying quality of life tools for neurogenic bladder function after spinal cord injury: A systematic review. *J Spinal Cord Med*. 2017;40(5):505–29.

186. Chen X-L, Zhong L-H, Wen Y, Liu T-W, Li X-Y, Hou Z-K, et al. Inflammatory bowel disease-specific health-related quality of life instruments: a systematic review of measurement properties. *Health Qual Life Outcomes*. 2017;15(1):177.
187. Frew JW, Davidson M, Murrell DF. Disease-specific health related quality of life patient reported outcome measures in Genodermatoses: a systematic review and critical evaluation. *Orphanet J Rare Dis*. 2017;12(1):189.
188. Heaney A, Stepanous J, Rouse M, McKenna SP. A review of the psychometric properties and use of the rheumatoid arthritis quality of life questionnaire (RaQoL) in clinical research. *Curr Rheumatol Rev*. 2017;13(3):197–205.
189. Heint D, Prinsen CAC, Sach T, Drucker AM, Ofenloch R, Flohr C, et al. Measurement properties of quality-of-life measurement instruments for infants, children and adolescents with eczema: a systematic review. *Br J Dermatol*. 2017;176(4):878–89.
190. Kandel H, Khadka J, Goggin M, Pesudovs K. Patient-reported Outcomes for Assessment of Quality of Life in Refractive Error: A Systematic Review. *Optom Vis Sci*. 2017;94(12):1102–19.
191. Kao SS, Peters MDJ, Ooi EH. Pediatric tonsillectomy quality of life assessment instruments: A scoping review protocol. *Laryngoscope*. 2017;127:2399–406.
192. Khan S, Tangiisuran B, Imtiaz A, Zainal H. Health Status and Quality of Life in Tuberculosis: Systematic Review of Study Design, Instruments, Measuring Properties and Outcomes. *Heal Sci J*. 2017;11(1):1–10.
193. Kwan YH, Fong W, Tan VIC, Lui NL, Malhotra R, Østbye T, et al. A systematic review of quality-of-life domains and items relevant to patients with spondyloarthritis. *Semin Arthritis Rheum*. 2017;47(2):175–82.
194. Limperg PF, Terwee CB, Young NL, Price VE, Gouw SC, Peters M, et al. Health-related quality of life questionnaires in individuals with haemophilia: a systematic review of their measurement properties. *Haemophilia*. 2017;23(4):497–510.
195. Lucendo AJ, Arias-González L, Molina-Infante J, Arias Á. Systematic review: health-related quality of life in children and adults with eosinophilic oesophagitis-instruments for measurement and determinant factors. *Aliment Pharmacol Ther*. 2017;
196. Page TE, Farina N, Brown A, Daley S, Bowling A, Basset T, et al. Instruments measuring the disease-specific quality of life of family carers of people with neurodegenerative diseases: A systematic review. *BMJ Open*. 2017;7(3).
197. Poku E, Aber A, Phillips P, Essat M, Buckley Woods H, Palfreyman S, et al. Systematic review assessing the measurement properties of patient-reported outcomes for venous leg ulcers. *BJS open*. 2017;1(5):138–47.
198. Roydhouse J, Wilson I b. Systematic review of caregiver responses for patient health- related quality of life in adult cancer care. *Qual Life Res*. 2017;68(8):1925–54.
199. Strada L, Vanderplasschen W, Buchholz A, Schulte B, Muller AE, Verthein U, et al. Measuring quality of life in opioid-dependent people: a systematic review of assessment instruments. *Qual Life Res*. 2017;26:3187–200.
200. Sullivan KJ, Hunter Z, Andrioli V, Guerra L, Leonard M, Klassen A, et al. Assessing quality of life of patients with hypospadias: A systematic review of validated patient-reported outcome instruments. *J Pediatr Urol*. 2017;13(1):19–27.
201. Tang TS, Yusuf FLA, Polonsky WH, Fisher L. Assessing quality of life in diabetes: II – Deconstructing measures into a simple framework. *Diabetes Res Clin Pract*. 2017;126:286–302.
202. Tax C, Steenberg ME, Zusterzeel PLM, Bekkers RLM, Rovers MM. Measuring health-related quality of life in cervical cancer patients: a systematic review of the most used questionnaires and their validity. *BMC Med Res Methodol*. 2017;17(1):15.
203. Xin Y, Mcintosh E. Assessment of the construct validity and responsiveness of preference-based quality of life measures in people with Parkinson’s: a systematic review. *Qual Life Res*. 2017;26(1):1–23.
204. Aber A, Lumley E, Phillips P, Woods HB, Jones G, Michaels J. Themes that Determine Quality of Life in Patients with Peripheral Arterial Disease: A Systematic Review. *Patient*. 2018;11(5):489–502.
205. Chiarotto A, Terwee CB, Kamper SJ, Boers M, Ostelo RW. Evidence on the measurement properties of health-related quality of life instruments is largely missing in patients with low back pain, a systematic review. *J Clin Epidemiol*. 2018;102:23–7.
206. Cornelissen AJ, Kool M, Keuter XH, Hetus EM, Grzymala AAP de, van der Hulst RR, et al. Concerning Quality of Life Questionnaires in Breast Cancer-Related Lymphedema Patients: Review of the Literature by Cornelissen et al. *Lymphat Res Biol*. 2018;16(2):134–9.
207. de Vries CEE, Kalff MC, Prinsen CAC, Coulman KD, den Haan C, Welbourn R, et al. Recommendations on the most suitable quality-of-life measurement instruments for bariatric and body contouring surgery: a systematic review. *Obes Rev*. 2018;19(10):1395–411.
208. Dow J, Robinson J, Robalino S, Finch T, McColl E, Robinson L. How best to assess quality of life in informal carers of people with dementia; A systematic review of existing outcome measures. *PLoS One*. 2018;13(3).
209. Grobet C, Marks M, Tecklenburg L, Audige L. Application and measurement properties of EQ-5D to measure quality of life in patients with upper extremity orthopaedic disorders: a systematic literature review. *Arch Orthop Trauma Surg*. 2018;138:953–61.
210. Haywood KL, Pearson N, Morrison LJ, Castrén M, Lilja G, Perkins GD. Assessing health-related quality of life (HRQoL) in survivors of out-of-hospital cardiac arrest: A systematic review of patient-reported outcome measures. *Resuscitation*. 2018;123:22–37.
211. Luan L, Hu H, Li S-C. A Review of Studies of Quality of Life for Chinese-Speaking Patients with Ischemic Heart Disease. *Value Heal Reg Issues*. 2018;15:82–90.
212. Mason SJ, Catto JWF, Downing A, Bottomley SE, Glaser AW, Wright P. Evaluating patient-reported outcome measures (PROMs) for bladder cancer: a systematic review using the COnsensus-based Standards for the selection of health Measurement INstruments (COSMIN) checklist. *BJU Int*. 2018;
213. Mohammed MA, Moles RJ, Chen TF. Pharmaceutical care and health related quality of life outcomes over the past 25 years: Have we measured dimensions that really matter? *Int J Clin Pharm*. 2018;40(1):3–14.
214. Mpundu-Kaambwa C, Chen G, Huynh E, Russo R, Ratcliffe J. A review of preference-based measures for the assessment of quality of life in children and adolescents with cerebral palsy. *Qual Life Res*. 2018;27(7):1781–99.
215. Pollo CF, Meneguín S, Miot HA. Evaluation Instruments for Quality of Life Related to Melasma: An Integrative Review. *Clinics*. 2018;73:e65.
216. Tian L, Cao XY. Systematic review of the psychometric properties of disease-specific, quality-of-life questionnaires for patients with hepatobiliary or pancreatic cancers. *Japan J Nurs Sci*. 2018;15(2):99–112.

217. van Ierssel J, Sveistrup H, Marshall S. Identifying the concepts contained within health-related quality of life outcome measures in concussion research using the International Classification of Functioning, Disability, and Health as a reference: a systematic review. *Qual Life Res.* 2018;27(12):3071–86.
218. van Roij J, Fransen H, van de Poll-Franse L, Zijlstra M, Raijmakers N. Measuring health-related quality of life in patients with advanced cancer: a systematic review of self-administered measurement instruments. *Qual Life Res.* 2018;27(8):1937–55.
219. Yarlus A, Bayliss M, Cappelleri JC, Maher S, Bushmakina AG, Chen LA, et al. Psychometric validation of the SF-36® Health Survey in ulcerative colitis: results from a systematic literature review. *Qual Life Res.* 2018;27(2):273–90.
220. Yazdani N, Sharif F, Elahi N, Ebadi A, Hosseini SV. Psychometric Properties of Quality of Life Assessment Tools in Morbid Obesity: A Review of Literature. *J Evidence-based Care.* 2018;7(4):7–21.
221. Zaror C, Pardo Y, Espinoza-Espinoza G, Pont A, Munoz-Millan P, Martinez-Zapata MJ, et al. Assessing oral health-related quality of life in children and adolescents: a systematic review and standardized comparison of available instruments. *Clin Oral Investig.* 2018;
222. Hettiarachchi RM, Kularatna S, Byrnes J, Scuffham PA. Pediatric Quality of Life Instruments in Oral Health Research: A Systematic Review. *Value Heal.* 2019;22(1):129–35.
223. Balk, E. M., Gazula, A., Markozannes, G., Kimmel, H. J., Saldanha, I. J., Trikalinos, T. A., & Resnik, L. J. (2019). Psychometric Properties of Functional , Ambulatory , and Quality of Life Instruments in Lower Limb Amputees : A Systematic Review. *Archives of Physical Medicine and Rehabilitation*, 100(12), 2354–2370. <https://doi.org/10.1016/j.apmr.2019.02.015>
224. Belayneh, T. (2019). A systematic review of the psychometric properties of the cross-cultural adaptations and translations of the Prolapse Quality of Life ( P-QoL ) questionnaire. *Belayneh Abebaw Gebeyu Mulat Adefris Guri Rortveit*, 30, 1989–2000. <https://doi.org/10.1007/s00192-019-03920-1>
225. Bull, K. S., Hornsey, S., Kennedy, C. R., Darlington, A.-S. E., Grootenhuys, M. A., Hargrave, D., Liossi, C., Jonathan, P., Walker, D. A., & Morris, C. (2019). Systematic review: measurement properties of patient reported outcome measures evaluated with childhood brain tumor survivors or other acquired brain injury. *Neuro-Oncology Practice*, December. <https://doi.org/10.1093/nop/npz064>
226. Choukou, M.-A., Best, K. L., Catharine, B., & Hitzig, S. L. (2019). Identifying and Classifying Quality of Life Tools for Assessing Neurogenic Bowel Dysfunction After Spinal Cord Injury. *Spinal Cord Injury Rehabilitation*, 25(1), 1–22. <https://doi.org/10.1310/sci18-00019>
227. Daliya, P., Gemmill, E. H., Lobo, D. N., & Parsons, S. L. (2019). A systematic review of patient reported outcome measures ( PROMs ) and quality of life reporting in patients undergoing laparoscopic cholecystectomy. *Hepatobiliary Surgery and Nutrition*, 8(3), 228–245. <https://doi.org/10.21037/hbsn.2019.03.16>
228. Gabes, M., Tischer, C., & Apfelbacher, C. (2020). Measurement properties of quality - of - life outcome measures for children and adults with eczema : An updated systematic review. *Pediatric Allergy and Immunology*, 31, 66–77. <https://doi.org/10.1111/pai.13120>
229. Gondivkar, S. M., Bhowate, R. R., Gadgil, A. R., Sarode, S. C., & Gondivkar, R. S. (2019). Assessment of oral health-related quality of life instruments for oral submucous fibrosis : A systematic review using the COnsensus-based Standards for the selection of health Measurement Instruments ( COSMIN ) checklist. *Oral Oncology*, 93(January), 39–45. <https://doi.org/10.1016/j.oraloncology.2019.04.009>
230. Hasanvand, S., Rassouli, M., Mandegari, Z., & Salmani, N. (2019). A Critical Review of Instruments Measuring the Quality of Life of Cancer Patients in Iranian Studies and Their Psychometrics Properties. *Asian Pacific Journal of Cancer Prevention*, 20, 333–343. <https://doi.org/10.31557/APJCP.2019.20.2.333>
231. Hughes LJ, Farina N, Page TE, Tabet N, Banerjee S. Psychometric properties and feasibility of use of dementia specific quality of life instruments for use in care settings: a systematic review. *Int Psychogeriatrics.* 2019;1–15.
232. Hunt, C., Zahid, S., Ennis, N., Michalak, A., Masanic, C., Vaidyanath, C., Bhalerao, S., Cusimano, M. D., Baker, A., & Hunt, C. (2019). Quality of life measures in older adults after traumatic brain injury : a systematic review. *Quality of Life Research*, 28(12), 3137–3151. <https://doi.org/10.1007/s11136-019-02297-4>
233. Kamilu, S., Heather, S., Aldersey, M., Fayed, N., Kaka, B., & Okyere, C. (2019). Quality of life assessment scales in polio survivors : a scoping review. *Quality of Life Research*, 28(9), 2341–2357. <https://doi.org/10.1007/s11136-019-02185-x>
234. Lamsal, R., Finlay, B., Whitehurst, D. G. T., & Zwicker, J. D. (2019). Generic preference-based health-related quality of life in children with neurodevelopmental disorders : a scoping review. *Development Medicine and Child Neurology*, 169–177. <https://doi.org/10.1111/dmcn.14301>
235. Moshki, M., Khajavi, A., Vakilian, F., Minaee, S., & Hashemizadeh, H. (2019). The content comparison of health-related quality of life measures in heart failure based on the international classification of functioning , disability , and health : a systematic review. *Tabriz University of Medical Sciences*, 11(3), 167–175. <https://doi.org/10.15171/jcvtr.2019.29>
236. Speyer R, Kim JH, Doma K, Chen YW, Denman D, Phyland D, et al. Measurement properties of self-report questionnaires on health-related quality of life and functional health status in dysphonia: a systematic review using the COSMIN taxonomy. *Qual Life Res.* 2019;28(2):283–96.
237. van der Hout A, Neijenhuis KI, Jansen F, van Uden-Kraan C, Aaronson NK, Groenvold M, et al. Supportive Care in Cancer Measuring Health-Related Quality of Life in Colorectal Cancer Patients : Systematic Review of Measurement Properties of the EORTC QLQ-CR29. *Support Care Cancer.* 2019;
238. Vasconcelos Neto JA, Vasconcelos CTM, Karbage SAL, Farias HDCCAR, Machado SGDM, Saboia DM. Quality of Life in Women with Defecatory Dysfunctions: Systematic Review of Questionnaires Validated in the Portuguese Language. *Rev Bras Ginecol e Obstet.* 2019;41(3):191–8.

- 239 Crudgington, H., Pal, D. K., Rogers, M., Morris, C., & Morris, H. (2020). Epilepsy-specific patient-reported outcome measures of children ' s health-related quality of life : A systematic review of measurement properties. *Epilepsia*, 61, 230–248. <https://doi.org/10.1111/epi.16430>
- 240 Furtado, R., Macdermid, J. C., Nazari, G., Bryant, D. M., Faber, K. J., & Athwal, G. S. (2020). Cross-cultural adaptations and measurement properties of the WORC (Western Ontario rotator cuff index ) : a systematic review. *Health and Quality of Life Outcomes*, 9, 1–9. <https://doi.org/10.1186/s12955-020-1276-9>
- 241 Jones, F. J. S., Ezzeddine, F. L., Herman, S. T., Buchhalter, J., Fureman, B., & Moura, L. M. V. R. (2020). A feasibility assessment of functioning and quality-of-life patient-reported outcome measures in adult epilepsy clinics : A systematic review. *Epilepsy & Behavior*, 102, 106704. <https://doi.org/10.1016/j.yebeh.2019.106704>
- 242 Killian, M. O., Triplett, K. N., Masood, S. S., Boehler, J., & Mayersohn, G. S. (2020). Measurement of health - related quality of life in pediatric organ transplantation recipients : a systematic review of the PedsQL transplant module. *Quality of Life Research*, 29(5), 1137–1146. <https://doi.org/10.1007/s11136-019-02398-0>
- 243 Losada-Puente, L., Araujo, A. M., & Muñoz-Cantero, J. M. (2020). A Systematic Review of the Assessment of Quality of Life in Adolescents. *Social Indicators Research*, 147(3), 1039–1057. <https://doi.org/10.1007/s11205-019-02171-3>
- 244 Møller, A., Bissenbakker, K. H., Arreskov, A. B., & Brodersen, J. (2020). Specific Measures of Quality of Life in Patients with Multimorbidity in Primary Healthcare : A Systematic Review on Patient-Reported Outcome Measures ' Adequacy of Measurement. *Patient Related Outcome Measures*, 11, 1–10. <https://doi.org/10.2147/PROM.S226576>
- 245 Qian, X., Lee, R., Tan, Y., Hsiang, L., & Nan, C. (2020). Measurement Properties of Commonly Used Generic Preference - Based Measures in East and South - East Asia : A Systematic Review. *PharmacoEconomics*, 38(2), 159–170. <https://doi.org/10.1007/s40273-019-00854-w>
- 246 Santana-Berlanga, N. R., Porcel-Gálvez, A. M., Botello-Hermosa, A., & Barrientos-Trigo, S. (2020). Instruments to measure quality of life in institutionalised older adults : Systematic review. *Geriatric Nursing*, 000. <https://doi.org/10.1016/j.gerinurse.2020.01.018>
